# Supplementary material
Source: Research Square preprint supplement (doi:10.21203/rs.3.rs-9087008/v1)
Supplement: Supplementary file 1 [file 8509915234c69e4d01e7ca8e.docx]

**Table S1** Target polyphenols. CAS number, molecular mass, retention time and MS/MS transitions.

| **Polyphenols** | **CAS** | **Molecular mass  (g·mol-1 )** | **Retention time (min)** | **Precursor ion (m/z)** |
| --- | --- | --- | --- | --- |
| Gallic acid | 149-91-7 | 170.1 | 2.35 | 169.0 |
| 2,4,6-trihydroxybenzoic acid | 71989-93-0 | 188.1 | 3.37 | 168.9 |
| Gallocatechin | 970-73-0 | 306.3 | 3.80 | 305.0 |
| 3,4-dihydroxybenzoic acid | 99-50-3 | 154.1 | 3.88 | 152.9 |
| 2,4-dihydroxybenzoic acid | 89-86-1 | 154.1 | 4.41 | 153.0 |
| 2,5-dihydroxybenzoic acid | 490-79-9 |  | 4.44 | 153.0 |
| Caftaric acid | 67879-58-7 | 312.2 | 4.48 | 310.9 |
| 2,5-dihydroxybenzaldehyde | 1194-98-5 | 138.1 | 4.63 | 136.9 |
| 3,4-dihydroxybenzaldehyde | 139-85-5 | 138.1 | 4.64 | 136.9 |
| 3-hydroxybenzoic acid | 99-06-9 | 138.1 | 5.15 | 137.0 |
| 4-hydroxybenzoic acid | 99-96-7 | 138.1 | 5.18 | 137.0 |
| Procyanidin B1 | 20315-25-7 | 578.5 | 5.30 | 577.0 |
| Catechin | 18829-70-4 | 290.3 | 5.34 | 289.0 |
| 2,6-dihydroxybenzoic acid | 303-07-1 | 154.1 | 5.54 | 153.0 |
| 3,5-dihydroxybenzoic acid | 99-10-5 | 154.1 | 5.54 | 153.0 |
| 3-hydroxybenzaldehyde | 100-83-4 | 122.1 | 5.67 | 121.0 |
| 4-hydroxybenzaldehyde | 123-08-0 | 122.1 | 5.67 | 121.0 |
| 3,4-dimethoxybenzoic acid | 93-07-2 | 1820 | 603 | 1829 |
| Procyanidin B2 | 29106-49-8 | 5785 | 610 | 5770 |
| Chlorogenic acid | 327-97-9 | 3543 | 612 | 3530 |
| Ampelopsin | 27200-12-0 | 32025 | 620 | 3190 |
| Caffeic acid | 331-39-5 | 1802 | 650 | 1788 |
| Procyanidin C1 | 37064-30-5 | 8668 | 652 | 5770 |
| Epicatechin | 35323-91-2 | 2903 | 656 | 2890 |
| Epigallocatechingallate | 989-51-5 | 4584 | 679 | 4571 |
| Procyanidin A1 | 12798-56-0 | 5765 | 680 | 5770 |
| Gallocatechingallate | 84650-60-2 | 4584 | 729 | 4571 |
| Procyanidin A2 | 41743-41-3 | 5765 | 732 | 5770 |
| Orientine | 28608-75-5 | 4484 | 738 | 4771 |
| 7-hydroxycoumarin | 93-35-6 | 1621 | 780 | 1629 |
| 4-hydroxycinnamic acid | 501-98-4 | 1642 | 789 | 1630 |
| Epicatechingallate | 1257-08-5 | 4424 | 792 | 4411 |
| Polidatin | 27208-80-6 | 3904 | 798 | 3891 |
| Taxifolin | 480-18-2 | 30425 | 806 | 3030 |
| Catechingallate | 130405-40-2 | 4423 | 812 | 4411 |
| 3,4-dimethoxybenzaldehyde | 120-14-9 | 1662 | 833 | 1670 |
| Trans-ferulic acid | 537-98-4 | 1942 | 892 | 1928 |
| 4-methoxybenzaldehyde | 123-11-5 | 1361 | 911 | 1369 |
| Resveratrol | 501-36-0 | 22807 | 931 | 2271 |
| Robinetin | 490-31-3 | 30223 | 950 | 3012 |
| Quercetin-3-glucuronide | 22688-79-5 | 4784 | 954 | 4790 |
| Quercetin-3-rutinoside | 153-18-4 | 6105 | 972 | 6091 |
| Quercetin-3-glucoside | 482-35-9 | 4634 | 975 | 4650 |
| Myricetin | 529-44-2 | 3182 | 1009 | 3190 |
| Ellagic acid | 476-66-4 | 30219 | 1021 | 3010 |
| Rosmarinic acid | 20283-92-5 | 3603 | 1037 | 3590 |
| 3,4,5-trimethoxycinnamic acid | 90-50-6 | 2382 | 1113 | 2390 |
| Astragalin | 480-10-4 | 4484 | 1116 | 4470 |
| 3,5-dimethoxybenzaldehyde | 7311-34-4 | 1662 | 1126 | 1671 |
| Fisetin | 528-48-3 | 2862 | 1150 | 2850 |
| Daidzein | 486-66-8 | 2542 | 1153 | 2530 |
| Epsilon-viniferin | 62218-08-0 | 4545 | 1182 | 4551 |
| Quercetine | 117-39-5 | 3022 | 1183 | 3030 |
| Naringenin | 67604-48-2 | 2722 | 1189 | 2720 |
| Luteolin | 491-70-3 | 2862 | 1217 | 2850 |
| Kaempferol | 520-18-3 | 2862 | 1235 | 2850 |
| Isorhamnetin | 480-19-3 | 3163 | 1252 | 3170 |
| Diosmetin | 520-34-3 | 30026 | 1264 | 2990 |
| Apigenin | 520-36-5 | 2702 | 1263 | 2690 |
| Chrysin | 480-40-0 | 2542 | 1324 | 2531 |

**Section S1.** Statistical study parameters via Metaboanalyst 6.0

The data underwent a preprocessing procedure that included a low-variance filter applied using the interquartile range (IQR), removing the 10% of variables with the lowest variability. Subsequently, the data were median-normalized and scaled using Pareto scaling (mean-centered and divided by the square root of each variable’s standard deviation).

After preprocessing, several statistical approaches were applied to explore and discriminate patterns within the dataset. First, Principal Component Analysis (PCA) was performed to assess the overall structure of the data. Group separation was then evaluated using Partial Least Squares–Discriminant Analysis (PLS-DA). Discriminant variables among groups were identified through one-way ANOVA.

Model quality was assessed using a five-component evaluation, selecting PC1 and PC2 as the dimensions with the highest discriminative ability. The goodness-of-fit (R²Y) and predictive ability (Q²) parameters were calculated to evaluate the robustness and reliability of the generated models.

Additionally, heatmaps were constructed using the normalized data, applying autoscaling for variable standardization. Hierarchical clustering was conducted using Euclidean distance as the dissimilarity measure and Ward’s linkage method as the clustering algorithm.

| 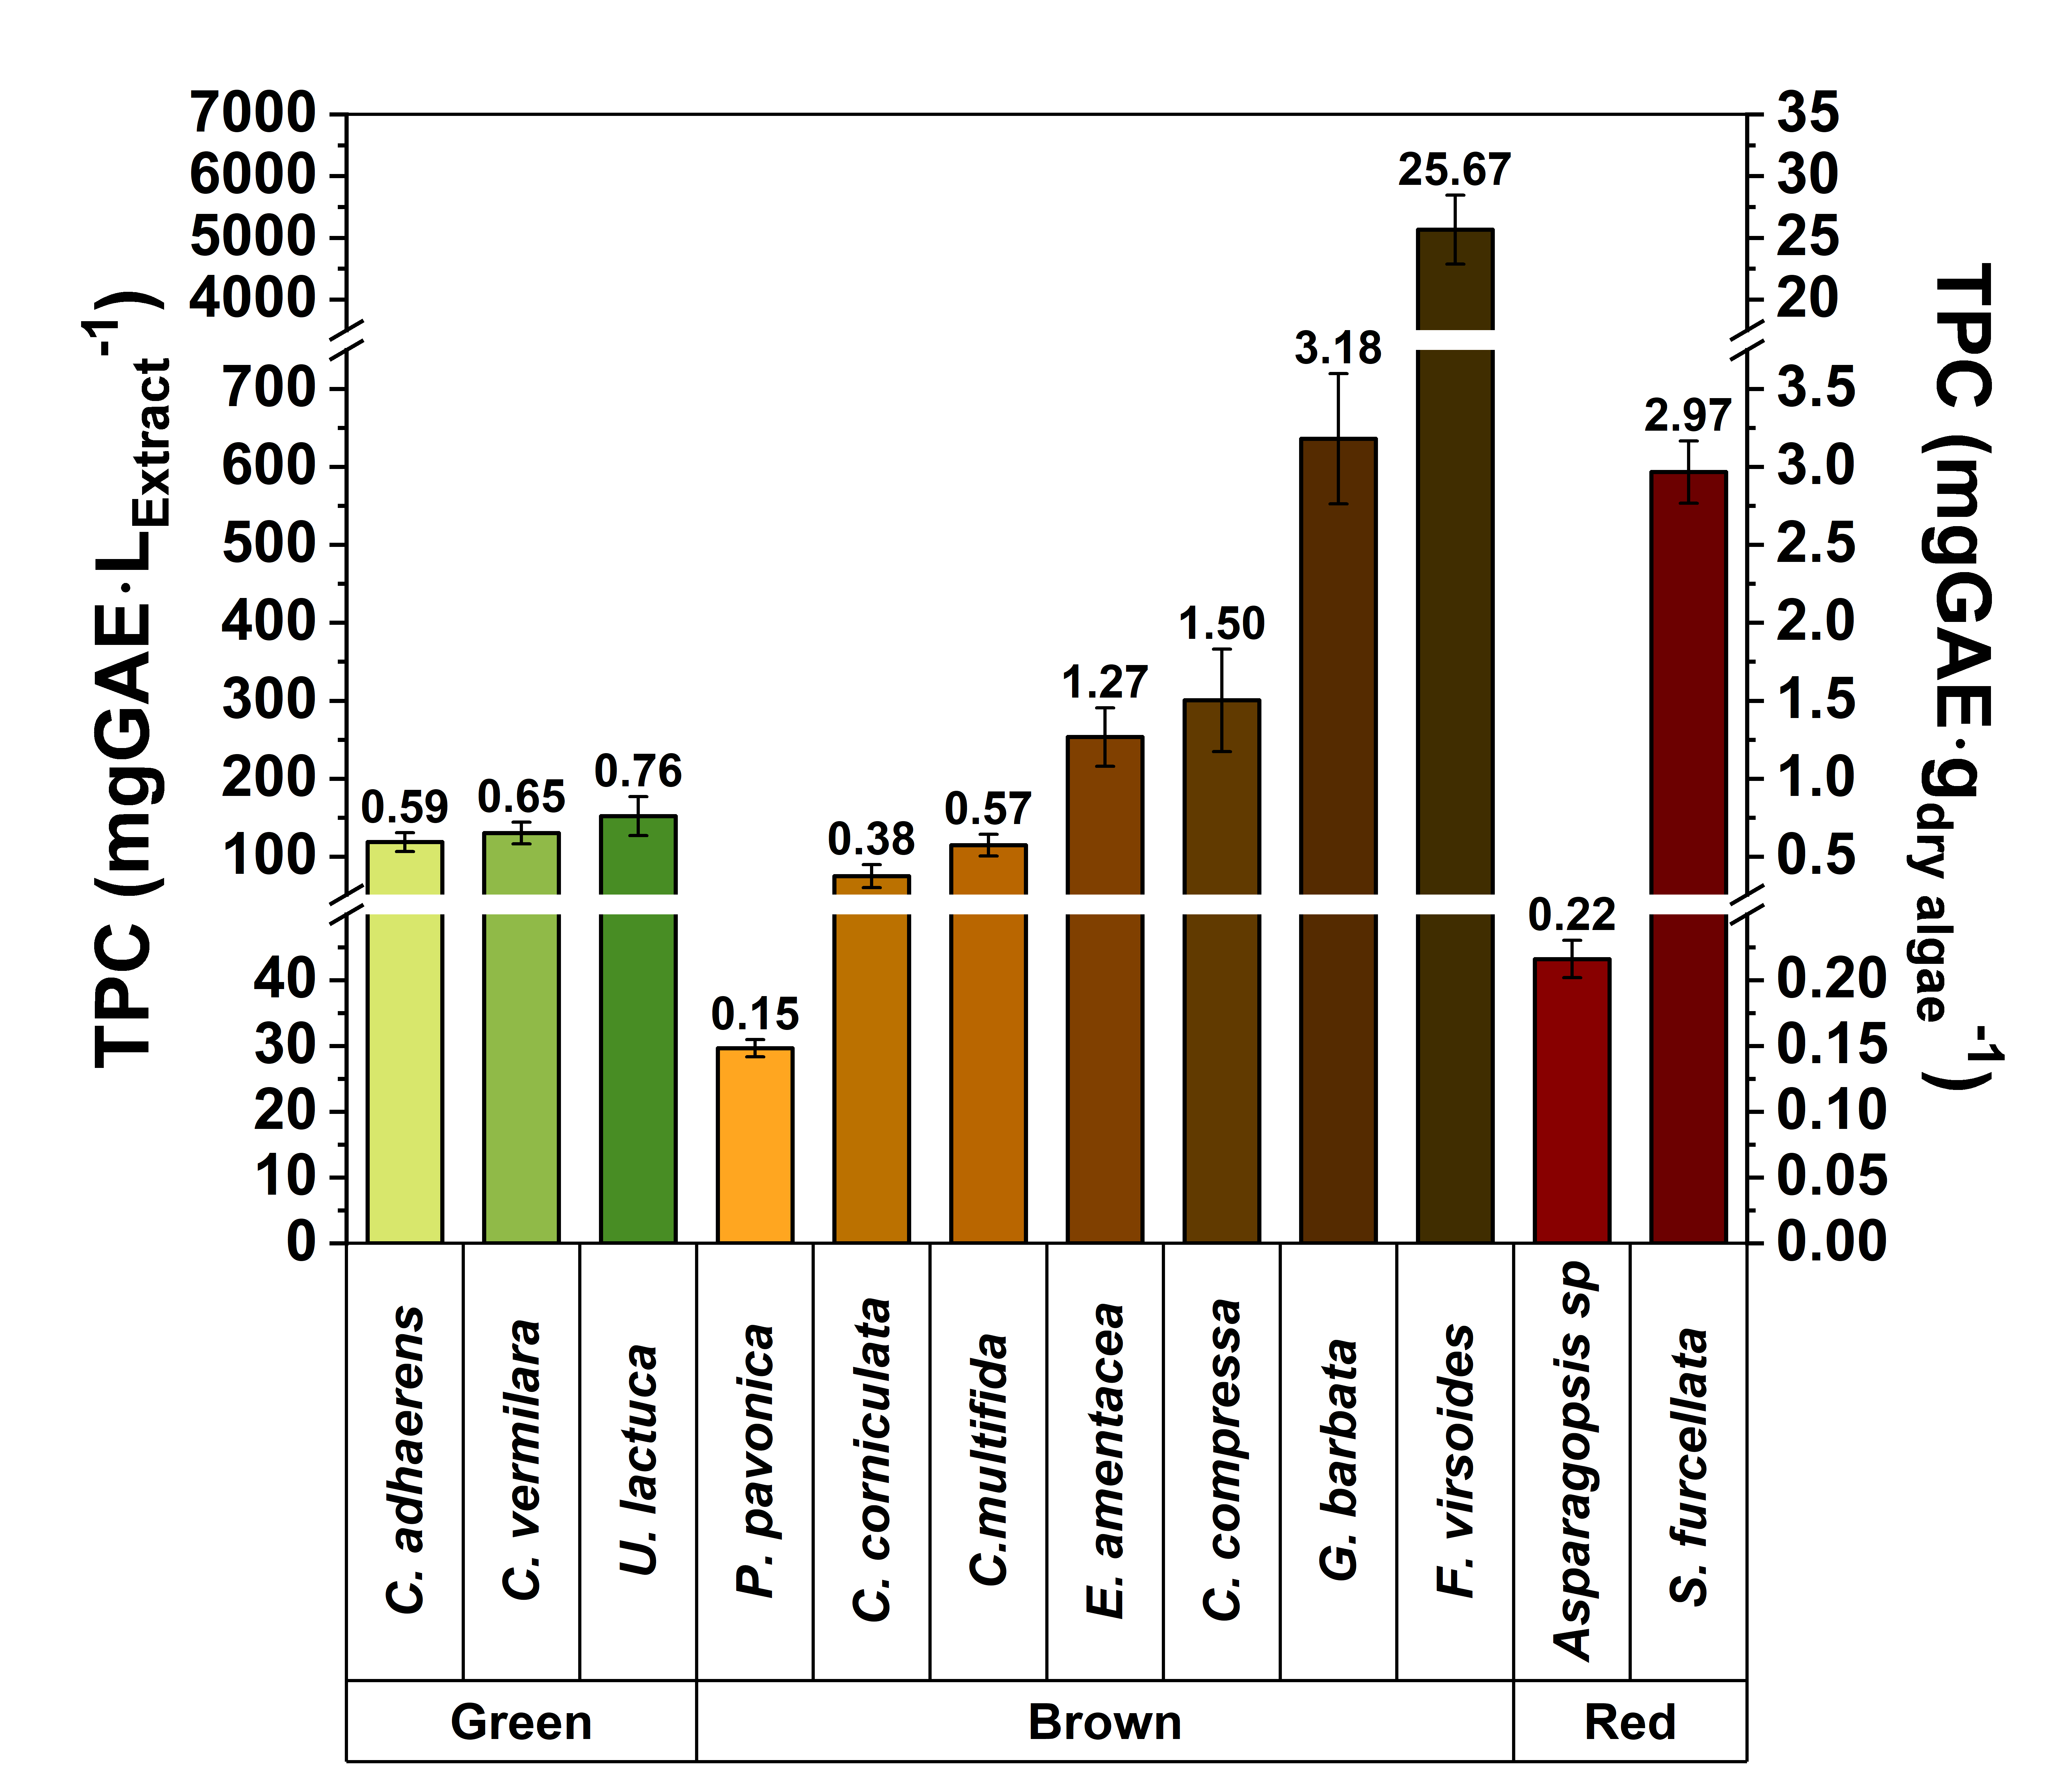 | 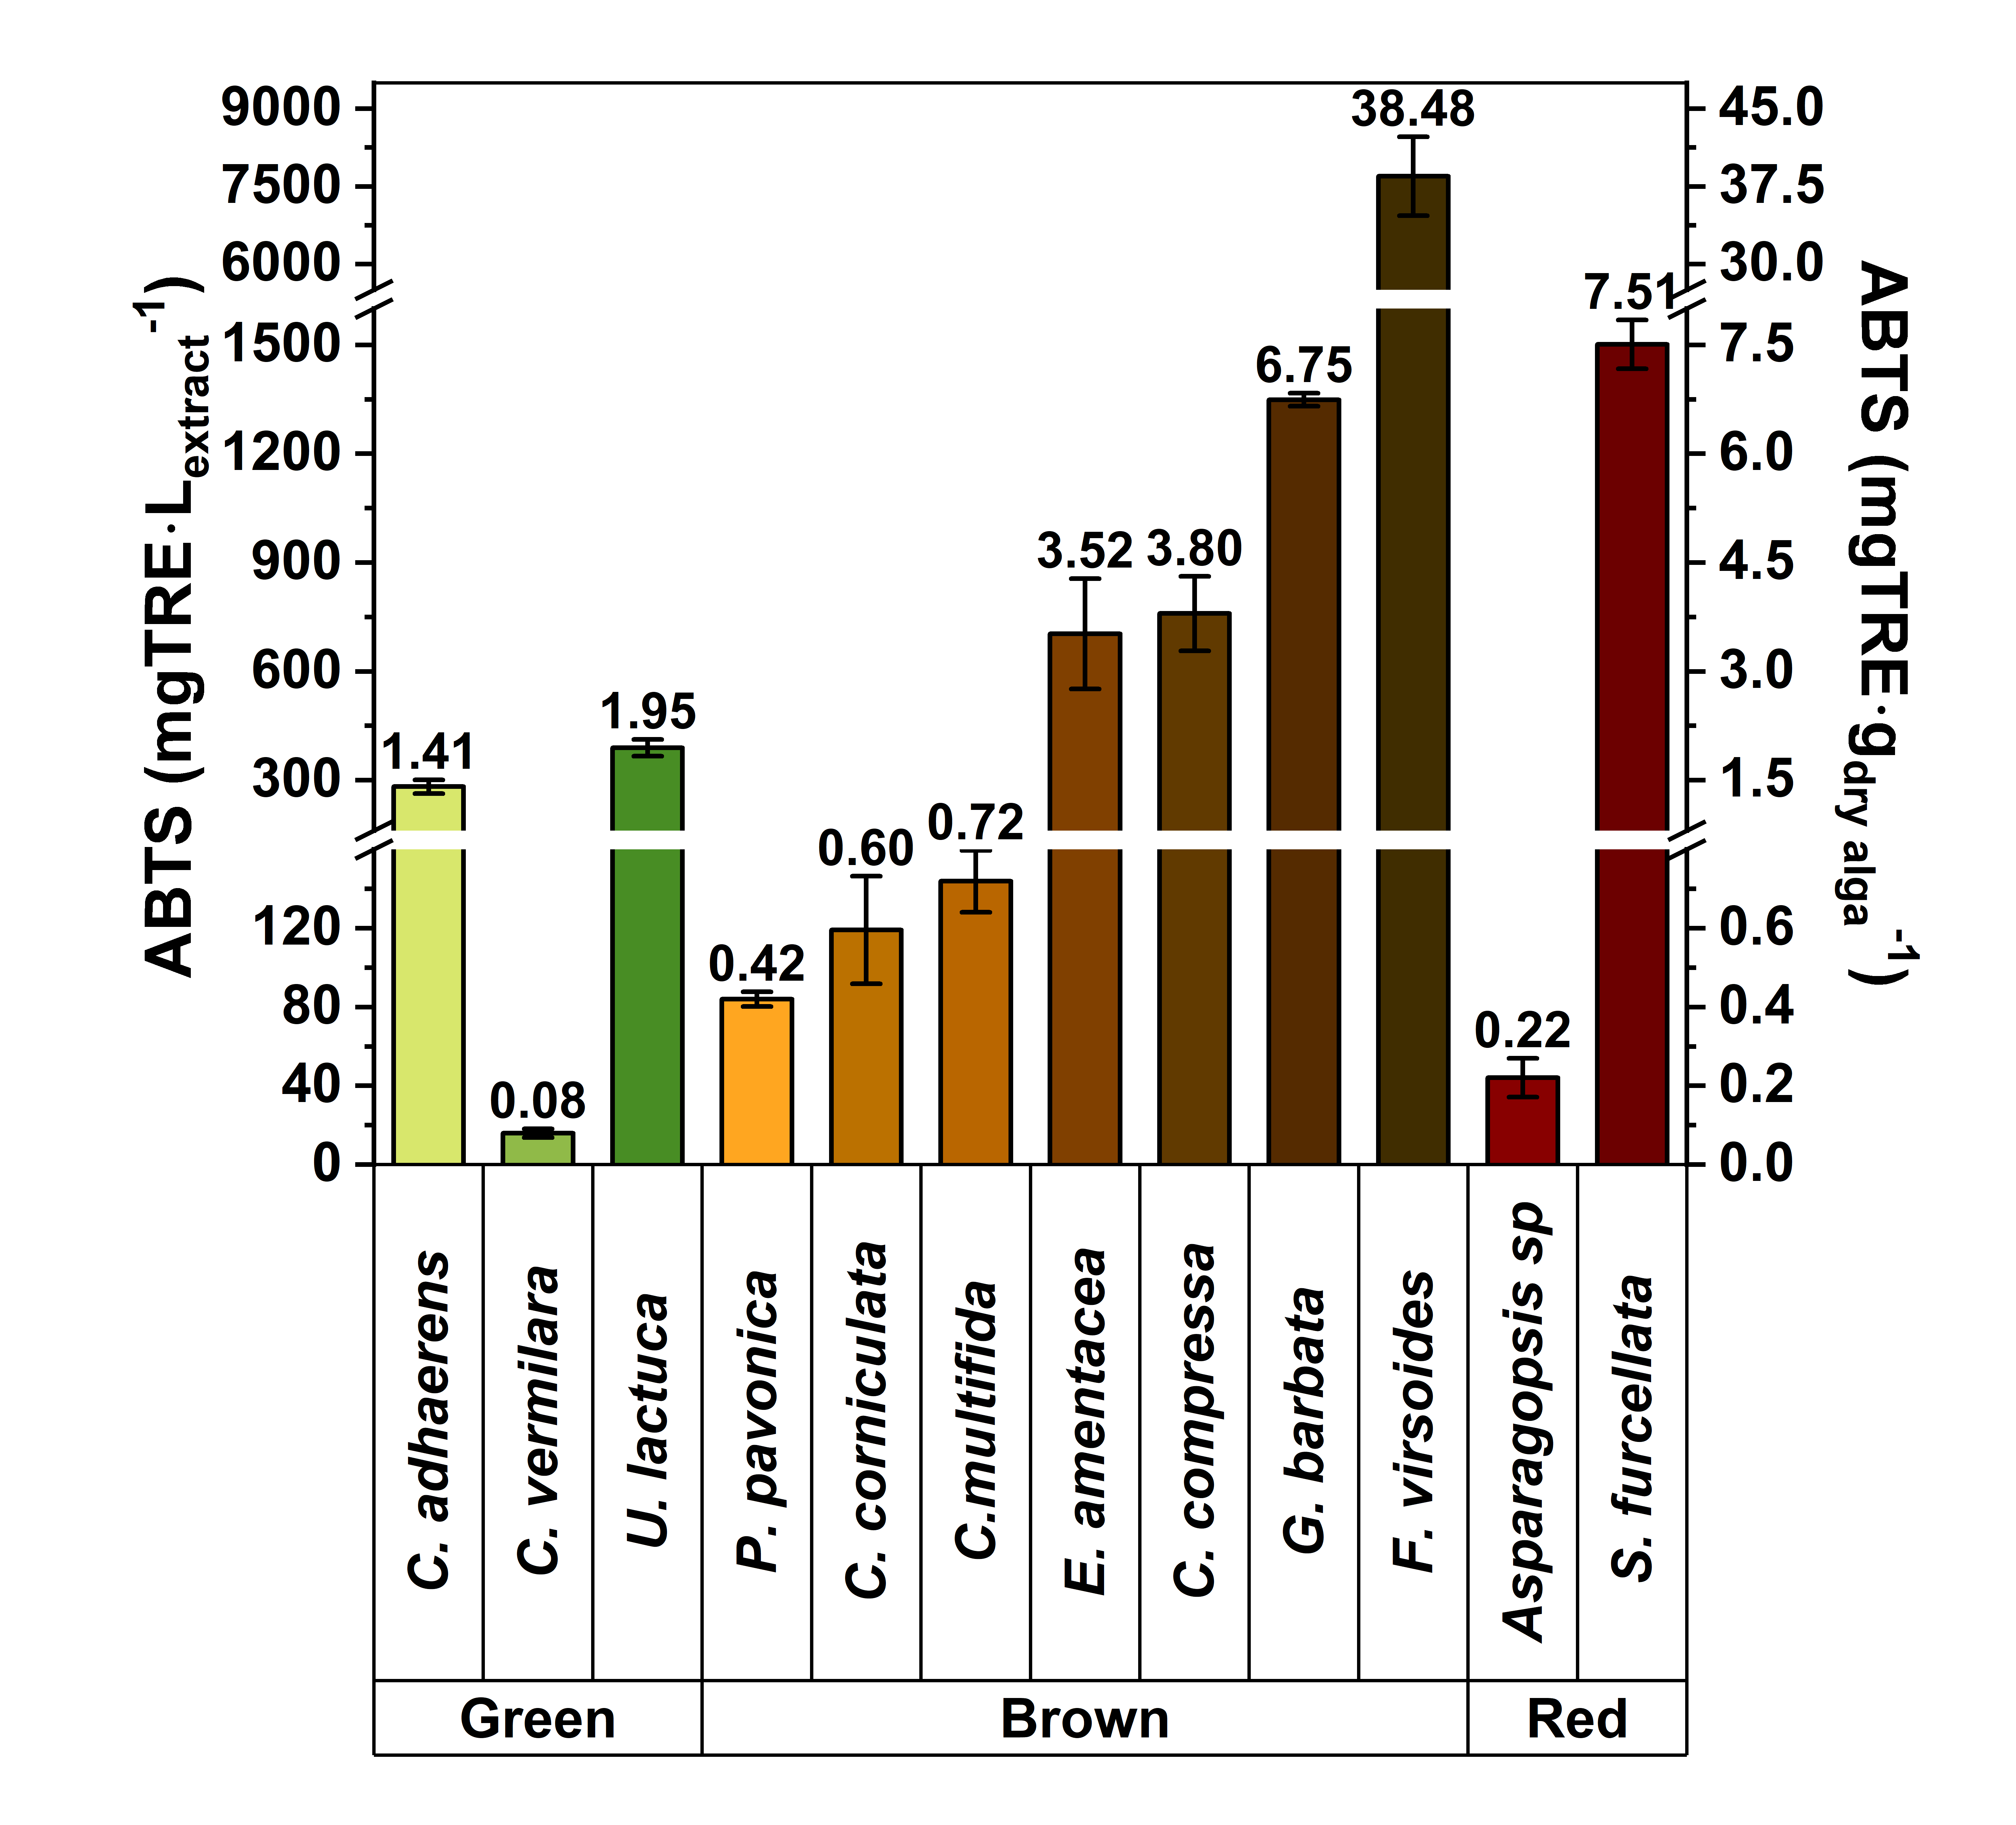 |
| --- | --- |
| (A) | (B) |
| 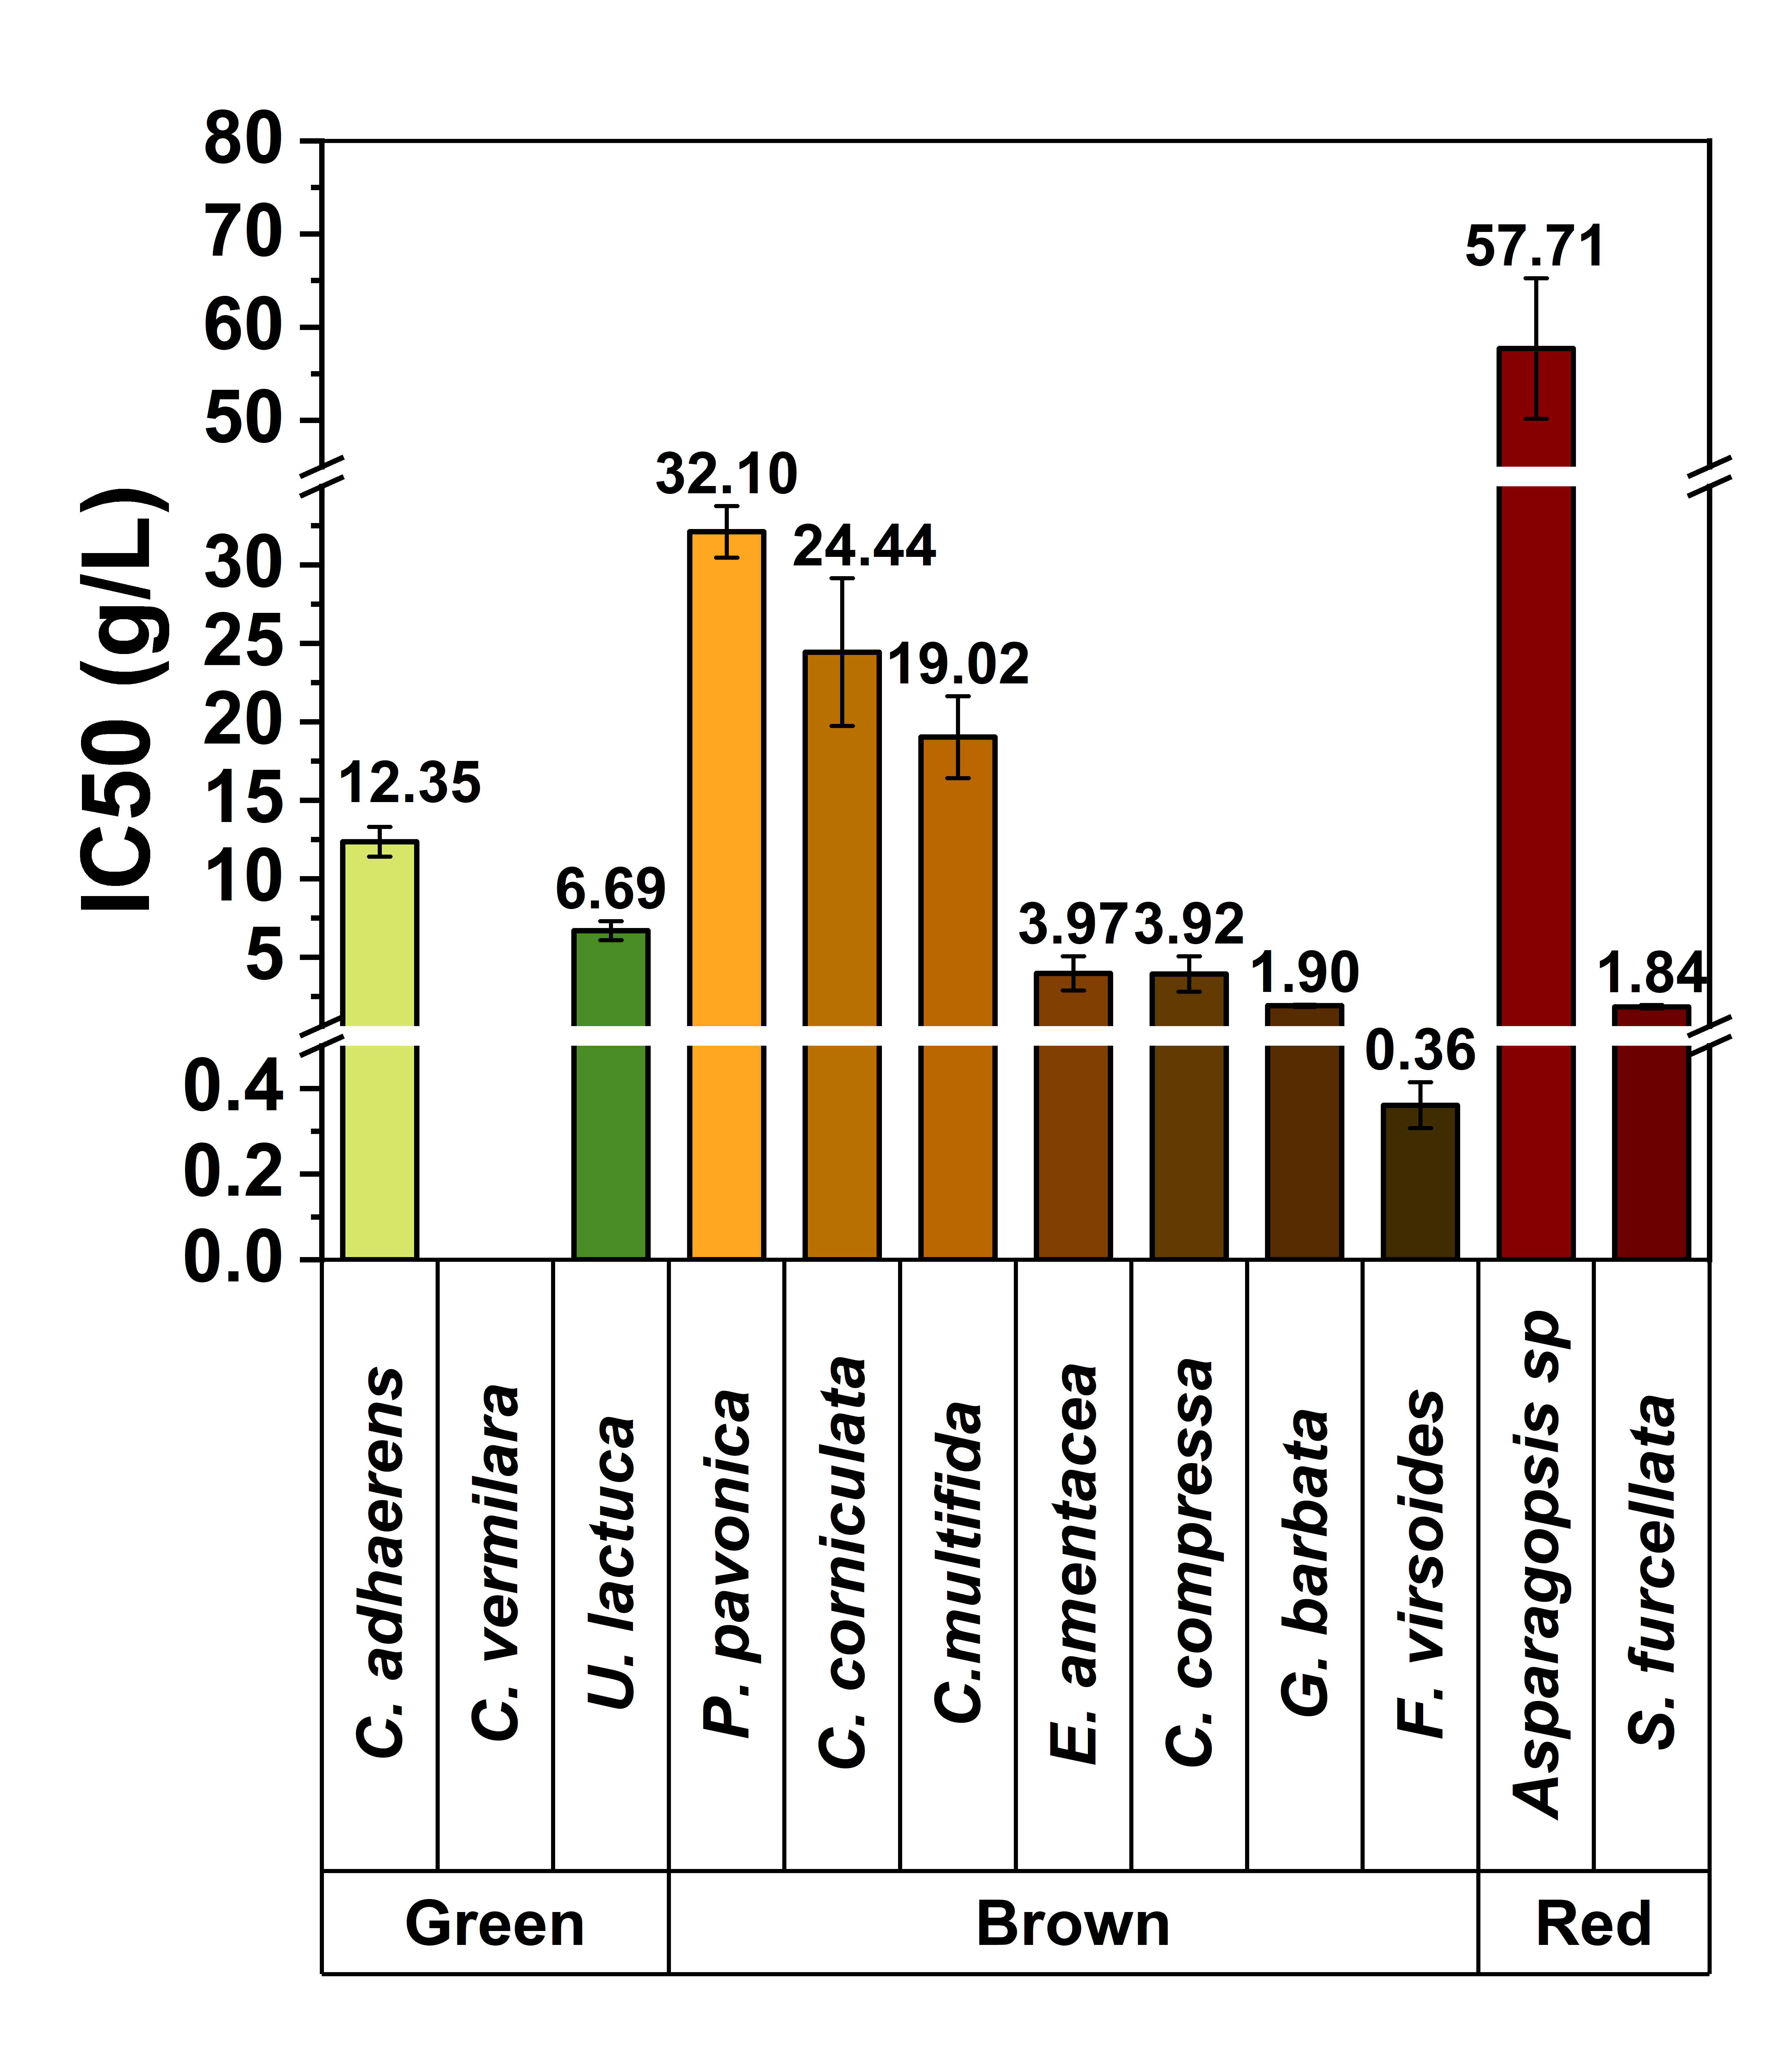 | |
| (C) | |

**Fig. S1** Comparative evaluation of (A) total phenolic content (TPC), (B) antioxidant capacity (ABTS assay), and (C) inhibitory concentration (IC₅₀) in macroalgae extracts obtained by MSPD with ethanol/water (50:50, v/v).
