# Supplementary material
Source: Research Square preprint supplement (doi:10.21203/rs.3.rs-9087008/v1)
Supplement: Supplementary file 2 [file fa5c9fd508f9561cebac2945.xlsx]

## Sheet: BUCKET TABLE
Bucket label	Mass (mDA)	RT (min)	[M+H]- (m/z)	GONGOLARIA_BARBATA_BROWN_NA_REP_1_MSPD_NEG_AUTOMSMS_7_1_14819	GONGOLARIA_BARBATA_BROWN_NA_REP_1_MSPD_NEG_AUTOMSMS_7_2_14820	GONGOLARIA_BARBATA_BROWN_NA_REP_1_MSPD_NEG_AUTOMSMS_7_3_14821	GONGOLARIA_BARBATA_BROWN_NA_REP_2_MSPD_NEG_AUTOMSMS_8_1_14822	GONGOLARIA_BARBATA_BROWN_NA_REP_2_MSPD_NEG_AUTOMSMS_8_2_14823	GONGOLARIA_BARBATA_BROWN_NA_REP_2_MSPD_NEG_AUTOMSMS_8_3_14824	GONGOLARIA_BARBATA_BROWN_NA_REP_3_MSPD_NEG_AUTOMSMS_9_1_14825	GONGOLARIA_BARBATA_BROWN_NA_REP_3_MSPD_NEG_AUTOMSMS_9_2_14826	GONGOLARIA_BARBATA_BROWN_NA_REP_3_MSPD_NEG_AUTOMSMS_9_3_14827	ERICARIA_AMENTACEA_BROWN_NA_REP_1_MSPD_NEG_AUTOMSMS_10_1_14829	ERICARIA_AMENTACEA_BROWN_NA_REP_1_MSPD_NEG_AUTOMSMS_10_2_14830	ERICARIA_AMENTACEA_BROWN_NA_REP_1_MSPD_NEG_AUTOMSMS_10_3_14831	ERICARIA_AMENTACEA_BROWN_NA_REP_2_MSPD_NEG_AUTOMSMS_11_1_14832	ERICARIA_AMENTACEA_BROWN_NA_REP_2_MSPD_NEG_AUTOMSMS_11_2_14833	ERICARIA_AMENTACEA_BROWN_NA_REP_2_MSPD_NEG_AUTOMSMS_11_3_14834	ERICARIA_AMENTACEA_BROWN_NA_REP_3_MSPD_NEG_AUTOMSMS_12_1_14835	ERICARIA_AMENTACEA_BROWN_NA_REP_3_MSPD_NEG_AUTOMSMS_12_2_14836	ERICARIA_AMENTACEA_BROWN_NA_REP_3_MSPD_NEG_AUTOMSMS_12_3_14837	ULVA_LACTUCA_GREEN_ZONE9_REP_1_MSPD_NEG_AUTOMSMS_13_1_14839	ULVA_LACTUCA_GREEN_ZONE9_REP_1_MSPD_NEG_AUTOMSMS_13_2_14840	ULVA_LACTUCA_GREEN_ZONE9_REP_1_MSPD_NEG_AUTOMSMS_13_3_14841	ULVA_LACTUCA_GREEN_ZONE9_REP_2_MSPD_NEG_AUTOMSMS_14_1_14842	ULVA_LACTUCA_GREEN_ZONE9_REP_2_MSPD_NEG_AUTOMSMS_14_2_14843	ULVA_LACTUCA_GREEN_ZONE9_REP_2_MSPD_NEG_AUTOMSMS_14_3_14844	ULVA_LACTUCA_GREEN_ZONE9_REP_3_MSPD_NEG_AUTOMSMS_15_1_14845	ULVA_LACTUCA_GREEN_ZONE9_REP_3_MSPD_NEG_AUTOMSMS_15_2_14846	ULVA_LACTUCA_GREEN_ZONE9_REP_3_MSPD_NEG_AUTOMSMS_15_3_14847	CYSTOSEIRA_COMPRESSA_BROWN_NA_REP_1_MSPD_NEG_AUTOMSMS_16_1_14849	CYSTOSEIRA_COMPRESSA_BROWN_NA_REP_1_MSPD_NEG_AUTOMSMS_16_2_14850	CYSTOSEIRA_COMPRESSA_BROWN_NA_REP_1_MSPD_NEG_AUTOMSMS_16_3_14851	CYSTOSEIRA_COMPRESSA_BROWN_NA_REP_2_MSPD_NEG_AUTOMSMS_17_1_14852	CYSTOSEIRA_COMPRESSA_BROWN_NA_REP_2_MSPD_NEG_AUTOMSMS_17_2_14853	CYSTOSEIRA_COMPRESSA_BROWN_NA_REP_2_MSPD_NEG_AUTOMSMS_17_3_14854	CYSTOSEIRA_COMPRESSA_BROWN_NA_REP_3_MSPD_NEG_AUTOMSMS_18_1_14855	CYSTOSEIRA_COMPRESSA_BROWN_NA_REP_3_MSPD_NEG_AUTOMSMS_18_2_14856	CYSTOSEIRA_COMPRESSA_BROWN_NA_REP_3_MSPD_NEG_AUTOMSMS_18_3_14857	CUTLEIRA_MULTIFIDA_BROWN_ZONE22_REP_1_MSPD_NEG_AUTOMSMS_19_1_14859	CUTLEIRA_MULTIFIDA_BROWN_ZONE22_REP_1_MSPD_NEG_AUTOMSMS_19_2_14860	CUTLEIRA_MULTIFIDA_BROWN_ZONE22_REP_1_MSPD_NEG_AUTOMSMS_19_3_14861	CUTLEIRA_MULTIFIDA_BROWN_ZONE22_REP_2_MSPD_NEG_AUTOMSMS_20_1_14862	CUTLEIRA_MULTIFIDA_BROWN_ZONE22_REP_2_MSPD_NEG_AUTOMSMS_20_2_14863	CUTLEIRA_MULTIFIDA_BROWN_ZONE22_REP_2_MSPD_NEG_AUTOMSMS_20_3_14864	CUTLEIRA_MULTIFIDA_BROWN_ZONE22_REP_3_MSPD_NEG_AUTOMSMS_21_1_14865	CUTLEIRA_MULTIFIDA_BROWN_ZONE22_REP_3_MSPD_NEG_AUTOMSMS_21_2_14866	CUTLEIRA_MULTIFIDA_BROWN_ZONE22_REP_3_MSPD_NEG_AUTOMSMS_21_3_14867	CODIUM_VERMILARA_GREEN_NA_REP_1_MSPD_NEG_AUTOMSMS_22_1_14869
SPECIE				G. barbata	G. barbata	G. barbata	G. barbata	G. barbata	G. barbata	G. barbata	G. barbata	G. barbata	E. amentacea	E. amentacea	E. amentacea	E. amentacea	E. amentacea	E. amentacea	E. amentacea	E. amentacea	E. amentacea	U. lactuca	U. lactuca	U. lactuca	U. lactuca	U. lactuca	U. lactuca	U. lactuca	U. lactuca	U. lactuca	C. compressa	C. compressa	C. compressa	C. compressa	C. compressa	C. compressa	C. compressa	C. compressa	C. compressa	C. multifida	C. multifida	C. multifida	C. multifida	C. multifida	C. multifida	C. multifida	C. multifida	C. multifida	C. vermilara
COLOR				02-BROWN	02-BROWN	02-BROWN	02-BROWN	02-BROWN	02-BROWN	02-BROWN	02-BROWN	02-BROWN	02-BROWN	02-BROWN	02-BROWN	02-BROWN	02-BROWN	02-BROWN	02-BROWN	02-BROWN	02-BROWN	01-GREEN	01-GREEN	01-GREEN	01-GREEN	01-GREEN	01-GREEN	01-GREEN	01-GREEN	01-GREEN	02-BROWN	02-BROWN	02-BROWN	02-BROWN	02-BROWN	02-BROWN	02-BROWN	02-BROWN	02-BROWN	02-BROWN	02-BROWN	02-BROWN	02-BROWN	02-BROWN	02-BROWN	02-BROWN	02-BROWN	02-BROWN	01-GREEN
1	205.98716	0.4	204.98	0	148	0	0	0	0	0	0	0	0	0	0	0	0	0	0	0	0	0	0	244	0	446	0	0	0	0	0	0	0	0	0	0	0	0	0	0	0	0	0	240	0	0	0	0	0
2	161.98208	0.69	160.975	7206	8188	9562	7798	8092	8076	7912	8876	8116	4750	4982	4324	5176	5054	5012	6384	5724	5984	13098	13726	13704	11654	10414	12386	10018	10268	10346	3912	7940	8552	8596	8844	8714	9028	9286	9056	9864	9630	8796	6894	7482	7294	9012	10044	8320	7066
3	169.03854	0.83	168.031	162	216	586	450	362	568	416	378	0	1716	1706	1678	2096	1922	1724	2230	2122	2032	398	202	562	396	222	304	318	144	262	960	890	1076	1012	444	538	1190	922	1158	704	674	896	920	950	1024	834	902	800	0
4	311.97757	1.02	310.97	6966	6900	8828	7474	7494	7776	8096	7478	8276	6476	6594	7018	5650	5748	5840	7906	7772	7060	0	0	0	0	0	0	0	0	0	17858	19058	21382	18336	17962	18822	15914	17558	18766	1820	264	1652	1498	1406	1388	1636	1962	1728	260
5	494.05600	1.03	493.049	3470	2970	3034	3270	3446	2900	2764	2944	3200	2282	2896	2650	2598	2208	2340	2894	2884	3222	0	0	0	0	0	0	0	0	0	10862	11872	11352	10460	10442	11678	11670	11486	11994	412	0	0	0	0	0	302	386	0	0
6	135.88852	1.03	134.881	5688	6182	6416	6686	7108	6342	7680	8110	6652	7618	8904	6716	6704	6724	6456	7778	7416	7414	4240	4626	4618	5112	4994	5538	5744	6304	6144	6392	5306	5550	5150	5680	4794	5454	5664	5178	8214	7776	8460	7928	7394	8034	9292	10028	10304	16876
7	132.89486	1.06	131.888	9774	9296	9606	10238	9320	10098	11070	13772	11594	11952	15792	11328	9548	10312	10302	11550	10800	10756	6950	7022	7120	8434	8294	8950	8408	9876	8318	8710	7544	8606	8688	8618	7794	7950	8070	8420	13460	13994	13292	11304	11688	11820	14294	14932	14240	26458
8	305.77189	1.07	304.765	0	472	0	0	0	0	0	0	0	0	0	0	0	0	0	0	0	230	0	0	0	0	0	0	0	0	0	2706	1498	528	296	370	1318	1334	1336	992	0	0	0	984	0	1096	1814	0	1268	12686
9	303.77428	1.08	302.767	0	0	0	0	0	0	0	0	0	0	0	0	0	0	0	0	0	0	0	0	0	0	0	0	0	0	0	962	1148	870	0	0	0	0	0	0	0	0	0	0	620	0	0	0	0	12686
10	269.89442	1.09	268.887	0	0	0	0	0	0	0	0	0	268	462	152	0	172	194	510	0	478	17910	14978	14988	3778	3534	2508	2962	2548	2358	0	0	0	0	0	0	0	0	0	658	402	758	754	1088	472	562	710	0	924
11	662.18474	1.09	661.177	0	0	0	0	0	0	0	0	0	0	0	0	0	0	0	0	0	0	0	0	0	0	0	0	0	0	0	0	0	0	0	0	0	0	0	0	256	0	0	0	0	0	0	0	0	0
12	239.79836	1.09	238.791	610	670	822	706	506	682	604	728	712	1048	1742	1202	1080	1152	1122	1030	986	920	322	446	276	236	366	436	252	124	226	334	162	0	260	240	200	0	0	130	5810	4858	5516	4194	4280	4452	5362	10774	5588	800
13	309.73372	1.09	308.726	0	0	0	0	0	0	0	0	0	0	0	0	0	0	0	0	0	0	0	0	0	0	0	0	0	0	0	0	0	0	0	0	0	0	0	0	0	0	0	0	0	0	0	0	0	0
14	401.61877	1.1	400.611	0	0	0	0	0	0	0	0	0	0	0	0	126	0	0	0	0	0	0	0	0	0	0	0	0	0	0	0	0	0	0	0	0	0	0	0	0	0	0	0	0	0	0	0	0	0
15	259.86443	1.11	258.857	0	0	0	0	0	0	0	0	0	0	0	0	0	0	0	0	0	0	5320	10010	6388	5978	4688	4764	5872	5150	5294	0	0	0	0	0	0	0	0	0	0	0	0	386	0	1152	684	870	1300	0
16	357.66891	1.11	356.662	0	0	0	0	0	0	0	0	0	0	0	0	0	0	0	0	0	0	0	0	0	0	0	0	0	0	0	0	0	0	0	0	0	0	0	0	0	0	0	0	0	0	0	0	0	0
17	341.98914	1.11	169.987	1480	1152	0	1214	290	0	0	510	0	812	1258	1206	1214	496	0	0	0	1170	3494	3042	4746	1620	1080	0	0	272	344	0	280	380	0	400	304	284	154	0	694	1168	1402	660	372	296	238	186	218	0
18	223.82117	1.13	222.814	0	0	950	934	0	0	1548	0	1412	1658	3692	1616	0	1346	1236	2136	1800	1914	2468	3930	3202	2718	2604	4068	2468	2338	2538	924	680	770	0	638	732	878	872	856	16746	25930	31854	12552	23912	27012	27662	34498	31198	19260
19	210.95557	1.13	209.948	0	0	0	0	0	0	0	0	0	0	0	0	280	0	0	0	0	0	0	1102	8600	5376	7906	4974	62720	71844	91944	0	0	0	0	0	0	0	0	0	0	0	0	0	0	0	0	0	0	3324
20	217.89927	1.14	107.942	0	0	0	0	0	0	0	0	0	0	0	0	0	0	0	0	0	0	0	0	0	3046	2984	2538	3354	3166	3642	0	0	0	0	0	0	0	0	0	0	0	0	98	0	0	0	116	0	0
21	158.91318	1.15	157.906	566	520	644	606	710	536	644	1192	1110	2348	2058	148	3678	3414	3856	2562	2682	2706	566	3672	14776	9666	11684	8310	22700	26444	26920	138	0	258	320	256	214	222	0	138	1030	1106	1574	1028	768	1060	4572	4016	4998	31304
22	226.81885	1.16	225.812	474	478	528	396	378	540	670	1024	684	670	1530	594	656	164	464	834	796	868	1608	2350	1336	1234	1076	1560	1232	1206	1112	370	292	280	340	398	642	386	388	492	7214	6814	7530	6248	6232	5844	8256	8878	8818	5442
23	445.56772	1.16	444.56	0	0	0	0	0	0	0	0	0	0	0	0	0	0	0	0	0	0	0	0	0	0	0	0	0	0	0	0	0	0	0	0	0	0	0	0	0	0	0	0	0	0	0	0	0	0
24	212.95400	1.16	211.947	0	0	0	0	0	0	0	326	0	0	0	0	0	0	0	256	0	0	0	0	1602	0	0	0	10764	10700	14168	0	0	0	0	0	0	0	0	0	196	0	0	0	0	178	0	0	0	1594
25	285.87839	1.17	284.871	0	0	0	0	0	0	0	0	0	0	0	0	0	160	0	260	172	186	70	0	0	3088	3104	164	3264	3364	3086	0	0	0	0	0	0	0	0	0	0	0	0	0	0	424	0	0	0	0
26	447.56575	1.17	446.558	0	0	0	0	0	0	0	0	0	0	0	0	0	0	0	0	0	0	0	0	0	0	0	0	0	0	0	0	0	0	0	0	0	0	0	0	0	0	0	0	0	0	0	0	0	0
27	167.93832	1.18	166.931	0	154	0	0	0	0	0	0	0	0	156	108	0	158	0	0	216	0	4280	3292	4316	3332	4612	4252	3964	3770	3602	112	266	0	192	160	136	0	0	0	164	0	0	0	0	0	306	146	254	260
28	320.74297	1.18	319.736	138	0	0	0	80	220	120	172	0	0	94	0	0	0	0	78	0	46	0	372	330	126	0	174	142	148	0	0	0	42	0	0	0	0	0	0	1982	1574	1740	1246	948	1222	1394	2252	1320	352
29	325.73420	1.18	324.727	0	564	316	0	424	0	522	734	0	344	428	314	194	168	162	252	0	258	254	722	262	0	378	256	200	0	0	0	0	0	232	328	248	300	188	502	1742	1280	1590	1298	1574	1578	1636	2110	2312	0
30	317.74509	1.19	316.738	0	0	0	0	0	0	0	0	0	0	0	0	0	0	0	0	0	0	218	0	404	158	0	236	206	258	150	0	0	0	0	0	0	0	0	0	0	0	0	0	0	0	1576	2706	0	252
31	493.55354	1.2	492.546	0	0	0	0	0	0	0	0	0	0	0	0	0	0	0	0	0	0	0	0	0	0	0	0	0	0	0	0	0	0	0	0	0	0	0	0	0	0	0	0	0	0	0	0	0	0
32	279.92331	1.21	278.916	0	0	0	0	0	166	0	0	0	0	0	0	228	0	242	0	212	0	8686	2590	0	0	0	568	0	0	0	0	0	0	218	0	0	0	0	124	0	0	0	0	0	0	0	0	0	0
33	192.41936	1.22	191.412	0	0	0	0	0	0	0	0	74	0	0	0	0	0	0	0	0	0	0	0	0	0	0	0	0	0	0	0	0	0	0	0	0	0	0	0	0	0	0	0	0	0	0	0	0	0
34	532.05893	1.23	531.052	0	322	0	232	0	0	0	0	0	0	0	0	352	0	0	0	0	0	0	0	0	0	0	0	0	0	0	0	0	0	0	0	0	0	0	0	0	0	0	0	0	0	264	0	0	0
35	134.05392	1.23	133.047	1578	1684	1560	0	0	0	0	0	0	0	0	0	0	0	0	0	0	0	3074	2306	1906	628	2002	1700	1854	1112	1266	0	0	0	0	0	0	0	0	0	1384	1206	776	1282	1288	1074	1496	1166	1154	404
36	236.84931	1.24	235.842	176	452	216	374	568	118	540	0	518	1146	854	890	434	868	572	932	710	842	6510	6922	6952	144	3462	2776	2732	2652	2588	144	144	0	0	0	0	0	366	198	8194	8278	7680	7638	7738	7416	5702	4498	5664	6054
37	498.07846	1.26	497.071	274	0	0	0	0	0	436	0	0	0	0	0	0	0	0	0	0	0	0	0	0	0	0	0	0	0	0	0	0	0	0	0	0	0	0	0	0	0	0	0	0	0	0	0	0	0
38	397.66379	1.27	396.657	0	0	0	0	268	0	0	550	192	0	0	0	0	0	0	0	0	0	0	0	0	0	0	0	0	0	0	208	0	0	0	0	0	436	0	0	0	206	0	386	0	0	0	470	0	0
39	192.24011	1.28	191.233	0	0	0	0	0	0	0	0	0	0	0	370	0	0	952	0	0	0	0	0	0	0	0	0	0	0	0	0	0	0	0	0	0	0	0	0	0	154	0	0	0	0	0	0	0	0
40	135.05233	1.29	134.045	296	1006	0	0	1522	1570	1412	1116	1450	1120	1106	1446	1700	1838	338	2152	2740	2334	10056	8500	8886	7238	7378	7436	6774	6320	6424	1506	1264	1416	1744	2036	2378	1480	1884	1748	1574	1592	1072	1800	1712	1366	1364	1460	1416	1186
41	311.96296	1.3	310.956	0	0	0	0	0	0	0	0	0	0	304	0	0	0	0	0	0	0	0	0	0	0	1072	1114	1288	1124	1218	0	0	0	0	0	0	0	0	0	0	0	0	0	0	0	0	0	0	0
42	349.67773	1.3	348.67	0	0	0	0	0	0	0	0	0	0	0	0	0	0	0	54	0	0	0	0	0	0	0	0	0	0	0	0	0	0	0	0	0	0	0	0	0	0	0	0	0	0	0	0	0	0
43	342.01041	1.31	341.003	1330	1142	1570	1258	1366	1286	1254	1310	1326	1226	1042	1152	1460	1536	1564	1344	1712	1430	800	618	440	322	0	0	0	0	0	496	744	690	818	926	692	358	528	474	546	0	328	0	402	478	0	256	0	0
44	303.07279	1.31	302.066	904	886	868	958	1040	1258	858	998	912	1626	1514	1594	2164	2246	1966	1652	1820	1596	3116	3412	3484	2708	2330	2328	2866	3152	2656	1744	1204	1536	1420	1570	1588	1186	1754	1478	3082	2166	2342	2916	2140	2478	2322	2228	2024	4394
45	303.68971	1.34	302.682	0	0	0	0	0	0	0	0	0	0	0	0	0	0	0	0	0	0	0	98	0	68	0	460	230	200	0	0	0	0	0	0	0	0	0	0	0	0	0	0	0	0	0	0	0	0
46	325.76837	1.34	324.761	0	0	0	0	0	0	0	0	0	0	0	0	0	0	0	0	0	0	48	0	0	72	120	0	0	0	104	0	0	0	0	0	0	0	0	0	0	390	0	652	0	0	0	454	344	4106
47	351.67557	1.36	350.668	0	0	0	0	0	0	0	0	0	0	0	0	0	0	0	0	0	0	0	0	0	0	0	0	0	0	294	0	0	0	0	0	0	0	0	0	0	0	0	0	0	0	0	0	0	0
48	146.05593	1.36	145.049	1802	1846	1910	1726	1732	1990	1578	1640	1570	2338	2194	2470	2398	2420	2176	2346	1974	2262	13614	12586	9946	9016	9242	7674	7108	7090	7262	1112	1202	1392	1220	1442	1486	1216	1096	1272	8088	7522	7568	7212	7466	7222	7984	7984	8374	0
49	503.98991	1.37	502.983	0	0	0	0	0	0	0	0	0	0	0	0	0	156	0	0	0	0	0	0	0	0	0	0	0	0	0	0	0	0	0	0	0	0	0	0	0	0	0	0	0	0	0	0	0	0
50	115.99488	1.38	114.988	0	0	0	0	0	0	0	0	0	0	0	0	0	0	0	0	0	0	0	0	0	0	0	0	0	0	0	0	0	0	0	0	0	0	0	0	0	0	0	0	0	0	0	0	0	0
51	273.96549	1.38	272.958	722	984	944	508	0	1114	0	0	0	596	912	0	870	0	0	0	1184	0	296	0	246	0	0	0	0	0	0	272	0	198	328	0	0	0	0	0	0	0	0	0	0	0	0	0	0	0
52	348.12599	1.38	347.119	860	1026	1200	1304	1222	1652	968	692	1022	654	456	0	380	360	470	660	550	610	0	0	0	0	0	0	0	0	0	0	0	0	1306	0	1254	0	0	0	0	0	264	0	0	0	0	0	0	0
53	598.04896	1.39	597.042	0	0	0	0	0	0	404	386	0	0	1952	0	0	322	436	0	1322	0	0	0	0	0	0	0	0	0	0	0	0	0	0	0	0	0	0	0	192	0	0	0	0	0	0	0	0	0
54	401.15409	1.4	400.147	1584	1492	1472	1156	1570	1430	1856	1424	1448	8662	7778	8594	14882	16722	16442	10170	10646	10558	0	0	0	350	0	318	0	404	0	1320	1358	0	1642	1312	1416	1402	1298	1524	420	374	512	272	330	0	358	208	336	0
55	247.99780	1.4	246.991	388	0	0	0	7294	7700	8310	6012	6194	716	0	1148	0	1596	1804	1746	1530	1678	720	46536	11454	6772	5934	5158	5964	5050	5826	1228	2464	6942	4332	3222	2384	0	1586	0	1326	1168	1194	1370	0	974	890	986	790	342
56	642.25713	1.42	641.25	0	0	0	0	0	0	0	0	0	478	322	700	676	1018	276	262	246	0	0	0	0	0	0	0	0	0	0	0	0	0	0	0	0	0	0	0	0	0	0	0	0	0	0	0	0	0
57	615.13979	1.42	614.133	784	0	966	0	846	814	0	922	902	4392	4540	0	5218	1794	3786	3510	3224	3620	0	0	0	0	0	0	0	0	0	0	224	0	0	0	0	324	0	0	0	0	0	0	0	0	0	0	0	0
58	501.63982	1.42	500.633	0	126	0	0	0	0	0	0	0	0	0	0	0	0	176	0	0	0	0	0	0	0	0	0	0	0	0	0	0	0	0	0	0	0	0	0	0	0	0	0	0	0	0	0	0	5618
59	577.18455	1.44	576.177	654	768	514	778	820	718	944	926	842	8602	10146	9026	7332	7390	7584	5804	6306	5978	0	0	0	0	0	0	0	0	0	112	0	0	318	406	370	256	0	324	0	0	0	0	0	0	0	0	0	0
60	807.15958	1.45	806.152	0	150	0	0	0	0	0	0	0	2802	3586	0	2442	2026	2328	1914	1920	2016	0	0	0	0	0	0	0	0	0	0	0	0	0	0	0	0	0	0	0	0	0	0	0	0	0	0	150	0
61	176.03092	1.46	175.024	1118	1100	1124	1294	1200	1406	1230	1392	1460	780	478	838	770	712	406	0	0	760	16750	10898	8172	4080	6484	5874	5124	4006	4038	580	678	874	800	740	680	810	614	596	622	744	538	792	828	510	524	530	596	0
62	283.71879	1.47	282.712	0	0	0	0	0	0	0	0	0	0	0	0	0	0	0	0	0	0	0	0	0	0	0	0	0	0	0	0	0	0	0	0	0	0	0	0	0	0	0	0	0	0	0	0	0	0
63	277.72531	1.48	276.718	0	0	0	0	0	0	0	0	0	0	0	0	0	0	0	0	0	0	0	0	0	0	0	0	0	0	0	0	0	0	0	0	0	0	0	0	0	0	0	0	0	0	0	0	0	0
64	202.80811	1.49	201.801	1602	1180	1080	0	1096	994	0	952	0	1234	1726	1508	1418	1404	1570	1106	1090	1210	236	634	584	392	496	214	336	0	0	1790	0	0	1254	1206	1386	0	1320	1268	1516	1282	1782	1326	1522	1266	1300	0	1224	0
65	79.92380	1.51	78.9165	1726	1636	0	1352	0	1276	1380	1432	0	0	0	0	0	0	0	0	0	0	3030	2318	2152	2110	2304	0	1184	2284	1980	0	0	0	0	0	1128	1286	0	934	0	0	0	0	0	0	0	0	1006	980
66	273.80105	1.52	272.794	0	0	0	0	0	118	0	0	0	0	166	0	0	0	0	0	0	0	0	0	0	0	0	0	0	0	0	0	0	0	0	0	0	0	0	0	0	0	0	0	96	0	164	0	0	7588
67	287.93786	1.55	286.931	7880	7612	6940	9078	8234	8036	10000	9764	9662	5340	5454	5050	7086	4728	4074	6282	6110	6402	0	0	0	0	0	0	0	0	0	1504	2070	2052	2548	2206	2654	2052	2194	2244	1556	1632	1670	0	932	0	1054	1306	1158	0
68	703.21186	1.57	702.205	192	0	0	0	0	0	0	0	0	3368	0	0	1926	1998	0	0	2514	0	0	0	0	0	0	0	0	0	0	0	0	0	0	0	0	0	0	0	0	0	0	0	0	0	0	0	0	0
69	817.24252	1.58	816.235	0	136	0	0	0	0	0	0	0	0	0	0	0	0	0	0	244	0	0	0	0	0	0	0	0	0	0	0	0	0	0	0	0	0	0	0	0	0	0	0	0	0	0	0	0	0
70	586.13743	1.58	585.13	274	0	0	0	0	0	0	224	0	0	0	0	0	0	410	326	0	0	0	0	0	0	0	0	0	0	0	0	0	0	0	0	0	0	0	0	0	0	0	0	0	0	0	0	0	0
71	358.11094	1.59	357.104	0	0	0	0	0	0	0	0	0	0	0	0	0	0	0	0	0	0	0	0	0	0	0	0	0	0	0	0	0	0	0	0	0	184	0	0	0	462	130	266	0	0	0	0	216	0
72	581.21546	1.59	580.208	0	0	0	0	0	0	0	0	0	0	74	0	0	0	0	0	0	0	0	0	0	0	0	0	0	0	0	0	0	0	0	0	0	0	0	0	0	0	0	0	0	0	0	0	0	0
73	328.10050	1.6	327.093	0	438	0	0	0	0	368	0	0	0	0	0	202	0	0	0	0	0	144	0	0	120	0	0	0	0	0	0	0	0	0	0	0	552	0	0	0	0	0	0	0	0	0	0	0	0
74	551.20630	1.6	550.199	0	0	0	0	0	0	0	0	0	0	0	0	0	0	0	0	0	0	236	0	0	0	0	0	0	0	0	0	0	102	0	0	292	0	0	0	0	0	0	0	0	0	0	0	0	0
75	689.20186	1.6	688.195	0	0	0	0	0	0	0	0	108	0	0	0	0	0	0	0	0	0	0	0	0	0	0	0	0	0	0	0	0	0	0	0	0	0	0	0	0	0	0	0	0	0	0	0	0	0
76	541.16660	1.62	540.159	0	0	0	0	112	0	0	0	0	0	0	0	0	426	0	506	0	192	0	0	0	0	0	0	0	0	0	186	0	0	0	0	0	0	0	0	0	0	0	0	0	0	0	0	0	0
77	646.19514	1.63	645.188	0	0	0	0	0	0	0	0	0	232	356	382	0	0	0	0	0	0	0	0	0	0	0	0	0	0	0	0	0	0	112	0	0	0	0	0	0	102	0	0	0	0	0	0	0	0
78	536.15793	1.64	535.151	0	0	0	0	0	0	0	0	0	612	440	578	244	148	0	0	332	0	0	0	0	0	0	0	344	0	0	0	0	0	0	0	0	0	0	0	0	0	0	0	0	0	0	0	0	0
79	817.25744	1.65	816.25	0	0	0	0	0	0	0	0	0	0	0	0	0	0	0	0	0	0	0	0	0	0	0	0	182	0	0	0	0	0	0	0	0	0	0	0	72	0	0	0	0	0	0	0	0	0
80	884.35085	1.67	883.344	0	0	0	0	0	0	0	0	0	0	138	0	0	0	0	0	0	162	0	0	0	0	0	0	0	0	0	0	0	0	0	0	0	0	0	0	0	0	0	0	76	0	0	0	0	0
81	653.23602	1.67	652.229	0	0	0	0	0	0	0	0	0	0	0	474	810	0	0	0	528	0	0	0	186	0	0	0	0	0	0	0	0	0	0	0	0	0	0	0	0	0	0	136	88	0	0	0	0	124
82	263.94630	1.67	262.939	0	0	0	0	188	0	0	0	0	0	0	0	0	0	0	0	0	0	0	0	0	0	0	0	0	0	0	0	0	0	0	0	100	0	0	0	0	0	0	0	0	0	0	0	0	0
83	770.32702	1.69	769.32	0	0	0	0	0	0	0	0	0	0	0	1194	0	0	0	0	0	0	0	0	152	0	0	0	0	0	0	0	0	0	0	0	0	0	0	0	0	0	0	0	0	0	0	0	0	0
84	729.29772	1.69	728.29	0	0	0	0	0	0	0	0	0	0	0	0	0	0	0	0	0	0	0	0	0	0	0	0	0	0	0	0	0	0	0	0	0	0	0	0	0	0	0	0	0	0	0	0	0	0
85	729.28746	1.7	728.28	0	0	0	0	0	0	0	0	0	0	0	0	408	486	0	0	0	58	0	0	0	0	0	0	0	0	0	0	0	0	0	0	0	0	0	0	0	0	0	0	0	0	0	0	0	0
86	568.21723	1.71	567.21	0	0	0	0	0	0	0	0	0	0	0	0	358	0	0	170	456	0	0	0	0	0	0	0	0	0	0	0	0	0	0	0	0	0	0	0	0	0	0	0	0	0	0	0	0	0
87	636.01585	1.71	635.009	714	0	756	988	1132	1032	0	1450	1540	12936	10620	11754	4436	5226	5578	8396	8960	8174	0	0	0	0	0	0	0	0	0	0	0	0	0	0	0	0	0	0	0	0	0	0	0	0	0	0	0	0
88	546.17830	1.73	545.171	0	0	0	0	0	0	0	0	0	0	0	0	0	0	184	148	0	0	0	0	0	0	0	0	0	0	0	0	0	0	0	0	0	0	0	0	0	0	0	0	0	0	0	0	0	0
89	186.05177	1.76	185.044	996	440	690	910	884	0	670	850	0	0	254	152	938	208	304	358	0	0	312	762	436	370	436	352	350	576	442	522	138	170	406	356	394	426	266	190	458	752	392	500	582	286	322	468	570	0
90	703.21868	1.78	702.211	118	0	0	0	262	0	0	0	0	376	406	0	332	330	0	298	0	0	0	0	0	0	0	182	0	136	0	0	0	0	0	0	0	0	0	0	0	0	0	0	0	0	0	0	0	0
91	651.98732	1.81	650.98	0	0	654	1112	1220	928	0	1348	1552	11118	8678	0	5846	5310	5904	6592	6810	6942	0	0	0	0	0	0	0	316	0	0	0	0	0	0	178	0	0	0	140	208	0	0	172	0	0	0	166	0
92	440.15305	1.83	439.146	0	0	0	0	0	0	0	0	0	0	0	0	0	0	0	0	0	0	0	0	0	0	0	0	0	0	0	0	0	0	0	108	0	0	0	0	0	0	0	0	0	0	0	0	0	0
93	127.90949	1.84	126.902	1118	0	1192	1744	0	1440	1472	1444	1664	0	0	0	0	0	0	0	0	0	0	0	0	5396	2606	2368	4992	3280	3160	1490	1456	1614	2196	2086	1928	1592	1812	1846	0	0	860	1002	1028	0	0	0	898	400
94	129.04034	1.85	128.033	1186	0	1288	1788	1550	1448	1468	1292	0	3284	2362	0	3166	2148	3464	2640	2752	2658	1020	0	0	0	304	0	0	0	0	0	0	3670	0	1704	0	0	3866	0	268	0	326	0	0	0	0	0	0	0
95	355.06925	1.87	354.062	0	346	214	0	0	478	0	0	400	622	510	352	556	454	526	576	528	0	0	0	0	0	1198	1468	1054	1594	0	398	276	332	0	424	326	274	380	310	0	0	0	0	60	0	346	186	0	0
96	104.00872	1.9	103.001	5022	4460	5680	9280	9084	8298	9606	7202	5766	3618	3270	3208	5730	4366	4402	4900	4814	4126	0	1534	648	0	0	0	586	658	522	2038	1972	2058	2314	4182	2294	1832	2266	2012	2996	2194	2276	1840	2364	1714	1886	1710	2434	0
97	60.01991	1.91	59.0126	0	2480	2664	3530	3232	2644	0	2732	2836	2116	2332	1900	2672	2238	2214	2456	2408	2536	0	0	0	0	0	0	0	482	0	1428	2252	1050	1420	1548	1480	1434	1546	1454	1602	2006	2070	1670	1644	1790	1888	0	0	152
98	388.06678	1.92	387.06	0	0	0	0	0	0	0	0	0	0	0	0	0	0	0	0	0	0	0	0	0	0	0	0	0	0	0	0	0	0	0	0	0	0	0	0	0	0	0	230	264	0	0	194	224	0
99	230.00309	1.92	228.996	0	0	0	0	0	0	0	0	0	0	0	0	0	0	0	0	0	0	0	0	0	0	0	0	0	0	0	0	0	0	0	0	0	0	0	296	324	0	0	0	0	0	0	0	0	0
100	317.74603	1.96	316.739	0	0	0	0	0	0	0	0	0	214	0	0	0	0	0	0	0	0	0	0	1796	2230	3014	3252	2636	2130	1930	0	0	0	0	0	0	0	0	0	0	0	0	0	0	0	0	0	0	186
101	347.06325	1.96	346.056	0	258	470	0	344	0	0	316	612	0	158	286	290	226	258	482	336	216	1570	0	1600	994	1450	1308	1236	1310	0	594	0	0	0	0	0	660	1548	0	0	0	2434	0	2392	0	0	1088	0	430
102	210.95520	1.98	209.948	0	0	0	0	0	0	0	0	0	0	0	0	0	0	0	0	0	0	0	0	1272	0	148	0	0	0	0	0	0	0	0	0	0	0	0	0	0	0	80	0	0	0	0	136	0	0
103	211.01326	2.01	210.006	240	182	280	60	148	122	0	228	258	2978	2690	3420	5430	4806	4800	9412	10058	9344	312	276	250	0	130	0	178	0	0	0	1182	1504	1504	0	1200	1056	616	950	118	0	194	230	0	0	0	0	0	0
104	220.05695	2.04	219.05	0	0	0	0	0	0	0	0	0	3750	0	0	0	6338	0	0	8670	0	308	0	0	432	0	0	0	0	0	0	0	0	0	0	0	0	0	0	0	1612	1648	0	1348	1554	1676	0	0	0
105	821.99976	2.11	820.992	0	0	0	0	0	0	0	0	0	0	0	372	0	0	0	0	0	0	0	0	0	0	0	0	0	0	0	0	0	0	0	0	0	0	0	0	0	0	0	0	0	0	0	0	0	0
106	704.21367	2.11	703.206	0	0	0	0	0	0	0	0	0	0	0	0	232	0	0	0	0	172	0	0	0	0	0	0	0	0	0	0	0	0	0	0	0	0	0	0	0	0	0	0	0	0	0	0	0	0
107	637.49414	2.14	317.74	0	0	0	0	0	0	0	0	0	0	0	0	0	0	0	0	0	134	0	0	0	0	0	0	0	0	0	0	0	0	0	0	0	0	0	0	68	0	0	0	0	0	0	0	0	0
108	636.40040	2.25	317.193	0	0	0	0	0	0	0	0	0	1546	0	1724	0	0	0	1562	0	0	0	0	0	0	0	0	0	0	0	0	0	0	0	0	352	0	0	0	0	0	0	0	0	0	0	0	0	0
109	614.02314	2.25	613.016	0	0	0	0	0	0	0	0	0	0	0	0	0	0	0	0	0	212	0	0	0	0	0	0	0	0	0	0	0	0	0	120	0	0	0	0	0	0	0	0	0	0	0	112	0	0
110	416.02961	2.27	415.022	0	0	0	0	0	0	0	0	0	480	500	876	338	324	360	464	442	630	0	1134	0	3212	3334	2750	3256	3426	2796	0	0	0	124	0	0	190	266	0	312	360	626	728	760	0	584	986	770	0
111	422.00709	2.28	421	1712	2410	2130	3078	3084	3276	3516	4790	3868	0	0	0	0	0	0	3336	0	0	0	164	0	0	572	400	0	416	0	0	0	0	416	376	366	0	0	148	394	234	250	218	0	208	374	410	0	0
112	798.16876	2.3	797.161	0	0	0	0	0	0	0	0	0	0	0	0	0	0	0	0	0	0	0	0	0	0	0	0	206	0	0	0	0	0	0	0	0	0	0	0	0	0	0	0	0	0	0	0	0	0
113	319.06457	2.32	318.057	2890	2858	2792	3194	3120	3088	2752	3956	3502	0	0	0	8084	8154	8738	15864	16490	16476	4506	4578	4496	4012	3800	3624	3286	2898	3574	1824	2070	1650	2150	2888	2076	1592	1994	1888	4246	5286	3300	5898	5318	3394	4758	3496	3770	534
114	318.74871	2.33	317.741	0	0	0	0	0	0	0	0	0	0	0	0	0	0	0	82	52	0	0	0	0	0	0	0	0	0	0	0	0	0	0	0	0	0	0	0	0	0	0	0	0	0	0	0	0	0
115	320.06090	2.34	319.054	2056	1880	2186	2428	2616	1950	2176	2328	2198	0	0	9874	5220	5616	5094	6414	8784	9142	3150	2592	2636	2792	2750	2286	2300	1992	2212	1154	1222	1116	1286	1252	1236	0	1264	0	2586	3124	2768	3102	2474	3074	2584	2632	2732	0
116	954.16986	2.36	953.163	0	0	0	0	0	0	0	0	0	0	0	0	0	0	0	0	0	0	0	0	0	0	0	0	0	0	0	0	0	0	0	0	0	0	0	0	0	0	0	0	0	0	0	0	0	0
117	976.16271	2.52	975.155	0	0	0	0	0	0	0	0	0	0	80	0	0	0	0	0	0	0	0	0	0	0	0	0	0	0	0	0	0	0	0	0	0	0	0	0	0	0	0	0	0	0	0	0	0	0
118	60.02045	2.54	59.0132	0	1602	1732	0	0	0	0	0	0	0	0	0	1246	0	1408	0	0	990	0	0	798	0	634	424	0	640	0	0	614	682	0	0	0	0	0	1154	0	0	0	590	0	0	882	0	914	0
119	104.00863	2.54	103.001	1664	4064	1640	3172	3278	2576	1512	1198	1220	1408	1528	1404	2380	3060	1278	1756	1098	2962	0	284	486	314	204	384	514	460	228	0	0	0	1118	1532	1144	0	0	0	578	0	0	0	498	0	476	448	0	0
120	317.74589	2.55	316.739	0	0	0	0	0	0	0	0	0	0	0	0	0	0	0	0	0	0	0	1896	0	0	0	0	578	466	358	0	0	0	0	0	0	0	0	0	0	0	0	0	0	0	0	0	0	0
121	954.17781	2.6	953.171	0	0	0	0	0	0	0	0	0	0	0	0	0	0	0	0	0	0	0	0	0	78	0	0	0	122	0	0	0	0	0	0	0	0	0	0	0	0	0	0	0	0	0	0	0	0
122	976.20200	2.63	975.195	0	0	0	0	0	0	0	0	0	0	0	0	0	0	0	0	0	0	0	0	0	86	0	0	0	0	0	0	0	0	0	0	0	0	0	0	0	0	0	0	0	0	0	0	0	0
123	136.03481	2.65	135.028	3766	5552	4720	5858	5946	5844	5456	5178	5552	1580	1548	1764	1580	1462	1692	1586	1434	1644	1468	2132	1744	0	0	1142	1116	0	1426	4492	5328	5906	6824	7020	7406	7116	6996	6268	968	0	0	718	0	492	0	0	694	0
124	210.95516	2.71	209.948	0	0	0	0	0	0	0	0	0	0	0	0	0	0	0	0	0	0	1186	204	0	0	0	0	0	0	0	0	0	0	0	0	0	0	0	0	0	0	0	150	0	160	202	0	0	23970
125	95.93029	2.79	94.923	10334	10562	11730	10850	13530	11728	11594	11492	11356	4536	5200	5050	6512	5834	6706	7010	5968	5706	0	0	526	90	184	148	146	144	146	6614	5952	5828	6582	7164	6686	7242	7480	7294	2576	2472	2344	1848	2014	1912	3180	3594	3110	34054
126	181.83298	2.8	180.826	0	0	0	0	0	0	0	0	0	0	0	0	0	0	0	0	0	0	0	0	0	0	0	0	0	0	0	0	0	0	0	0	0	0	0	0	0	0	0	0	0	0	0	0	0	0
127	433.95888	2.82	432.952	0	0	0	0	0	0	0	0	0	0	0	0	0	0	0	0	0	0	0	0	0	304	0	0	0	306	0	0	0	0	0	0	0	0	0	0	0	0	0	218	0	0	0	0	0	0
128	674.07699	2.86	673.07	0	200	0	0	0	0	0	0	0	0	0	0	0	0	0	0	0	178	0	164	0	0	0	0	0	0	0	0	0	208	0	0	0	0	0	0	0	0	0	0	0	0	0	0	0	0
129	81.92157	2.87	80.9143	1778	1926	1790	1708	1796	1720	1654	1888	1760	1116	1188	1128	1278	0	1354	1584	1690	1646	1594	1540	0	0	0	0	0	0	0	1422	1474	1360	1634	1622	1654	1516	1346	1624	1506	1572	1402	1410	1344	1278	1238	1366	0	1008
130	341.99289	2.87	340.986	394	346	378	0	0	190	0	0	0	0	904	452	472	288	0	0	282	0	1448	0	1664	1526	660	528	290	484	264	0	0	0	294	168	0	162	0	324	248	556	0	0	132	0	0	0	0	0
131	79.92374	2.98	78.9165	0	1472	1526	1764	1488	1466	1860	1908	1530	1110	1292	1190	1298	0	1110	1476	1582	1918	1528	1196	0	0	0	0	0	472	0	1368	1332	1186	1260	1202	1350	1322	1422	0	1428	1774	1138	0	0	1298	1080	1326	1208	0
132	976.14988	2.99	975.143	0	0	0	0	0	0	0	0	0	0	0	0	0	0	0	0	0	0	0	0	0	0	0	0	0	0	0	0	0	0	0	0	0	0	0	0	0	0	0	0	0	0	0	0	0	0
133	129.89683	3.08	128.89	3666	3756	3008	3700	3414	2908	2964	2912	3246	1272	1298	1250	1372	1512	1424	2096	2086	2130	0	352	0	0	148	178	172	170	198	2774	3502	4106	4882	5362	6058	5878	6924	7784	3130	2626	2866	2574	2702	2446	3582	2860	3890	12626
134	548.04484	3.12	547.038	632	0	0	0	0	428	236	0	0	0	450	1170	0	0	0	0	0	0	0	0	0	0	0	0	0	234	0	0	0	0	0	0	0	0	0	0	0	0	0	0	0	0	0	0	0	0
135	194.03011	3.18	193.023	634	500	746	680	506	770	786	0	450	982	0	1286	0	0	676	1178	0	0	474	232	290	378	0	204	0	186	0	0	0	0	442	0	0	0	342	0	0	362	0	0	286	0	250	0	0	0
136	376.02014	3.19	375.013	0	1478	0	0	0	0	0	674	0	2658	0	2438	1332	2406	0	2472	2232	1982	1006	498	456	0	0	0	0	0	0	0	248	322	336	0	728	434	296	0	0	420	0	396	396	402	430	332	372	432
137	153.99219	3.2	152.985	350	426	412	252	426	398	432	148	352	420	518	382	400	524	396	464	620	0	11326	4286	2996	2088	1298	2116	0	1846	0	262	400	0	198	144	120	0	236	194	230	296	368	664	646	464	296	406	578	432
138	232.00275	3.36	230.995	1110	0	0	0	0	0	0	0	22926	1492	0	10494	0	0	0	0	0	0	2660	3954	2822	2384	1826	1852	1592	1616	1492	0	2788	5372	4408	4742	3840	2256	2402	1890	0	1176	1232	1240	0	0	1102	0	0	478
139	320.06184	3.38	319.055	0	0	0	0	0	584	540	0	744	1738	0	1952	730	848	854	1736	0	1468	1452	2074	0	1106	0	1816	992	0	502	402	366	284	0	0	304	0	0	0	444	564	544	512	750	0	0	498	492	164
140	295.69605	3.48	294.689	0	0	0	0	0	0	0	0	0	0	0	0	0	0	0	0	0	0	0	0	0	0	0	0	0	0	0	0	0	0	0	0	0	0	0	0	0	0	0	0	0	0	0	0	0	0
141	301.93990	3.49	300.933	0	0	0	0	420	380	0	0	122	0	0	0	204	0	150	0	252	0	306	440	622	1006	0	1106	1148	1378	0	0	162	0	0	0	0	0	0	0	164	146	314	0	166	230	254	194	98	0
142	636.12448	3.51	635.117	168	186	0	0	0	0	0	0	0	0	210	0	0	0	0	0	0	206	0	0	0	0	0	0	0	0	0	0	0	0	0	144	0	0	0	0	0	0	0	0	0	0	0	0	0	0
143	305.98940	3.62	304.982	0	0	0	0	0	0	0	0	0	0	0	0	0	0	0	0	0	0	0	0	0	170	168	366	334	204	240	0	0	0	0	0	0	0	0	0	0	0	0	0	0	0	0	0	0	0
144	127.90994	3.68	126.903	1610	1300	0	1452	1594	1900	1662	1914	1708	1436	0	1758	1210	1234	1570	1734	1748	1888	2020	2500	1724	0	1452	1378	0	0	0	2810	2082	2464	3450	3240	3468	3872	3032	3226	0	0	1434	1320	1690	1384	1474	1378	1212	0
145	170.99449	3.71	169.987	0	0	0	0	534	620	860	0	0	896	1366	0	1056	888	0	0	868	0	2914	2152	4376	2580	0	0	0	720	0	0	414	284	522	570	566	414	368	592	602	1130	1424	450	384	94	202	146	0	0
146	623.22023	3.91	622.213	0	0	0	0	0	0	0	0	0	0	0	0	108	0	0	0	0	0	442	12974	3830	2006	1702	1934	0	1606	1272	0	0	0	0	0	0	0	0	0	0	0	0	0	0	0	0	0	0	0
147	242.12586	3.93	241.119	2188	2090	2200	2002	1956	1790	2382	2312	2316	2060	1822	2036	2210	2012	1986	1966	2050	1866	0	0	0	0	0	0	0	0	0	3330	4242	4480	7206	6300	7668	5436	5560	5622	2010	2120	1568	1532	1846	1724	1712	2062	1902	0
148	421.23100	3.94	420.224	0	0	0	0	0	0	0	0	0	0	0	0	0	0	0	0	0	0	11644	11024	13648	11386	12894	13322	12334	12194	13718	0	0	0	0	0	0	0	0	0	0	0	162	0	0	0	0	0	0	0
149	473.19280	3.95	472.186	0	0	0	0	0	0	0	0	0	0	0	0	0	0	0	0	0	0	5486	5466	8598	31482	33738	34254	33554	33200	34298	0	0	0	0	0	0	0	0	0	0	138	0	0	0	0	0	0	0	0
150	411.20238	3.95	410.195	0	0	0	0	0	0	0	0	0	0	0	0	0	0	0	0	0	0	46872	41134	40088	21066	19238	16872	15386	14996	13212	0	0	0	0	0	0	0	0	0	0	0	0	0	0	0	0	0	0	0
151	721.18643	4.07	720.179	0	0	0	0	0	0	0	0	0	0	0	0	0	0	0	0	0	0	0	852	610	1664	1700	1762	1762	1772	742	0	0	0	0	0	0	0	90	0	0	0	0	0	0	0	0	0	0	0
152	172.06894	4.12	85.0272	0	0	0	0	0	0	1450	0	0	0	0	0	0	0	0	0	0	0	0	0	0	0	0	0	0	0	0	0	0	0	0	0	0	0	0	0	0	0	0	0	0	0	0	0	0	0
153	295.69647	4.18	294.689	0	0	0	0	0	0	0	0	0	0	0	0	0	0	0	0	0	0	0	0	0	0	0	0	0	0	0	0	0	0	0	0	0	0	0	0	0	0	0	0	0	0	0	0	0	0
154	197.93068	4.26	196.923	0	54	76	0	0	0	0	152	0	0	0	0	202	152	104	142	0	126	0	0	0	2514	2616	2768	2874	3282	2878	118	0	182	188	200	118	0	0	0	0	0	0	0	166	0	222	182	0	0
155	196.81795	4.37	195.811	2700	1980	1998	1670	1758	1692	1658	1664	1744	3274	2932	3090	2992	2886	2810	2888	2188	2234	5204	5182	5400	2706	2320	2586	2232	0	2094	3528	3300	2568	2450	2566	2780	2386	2670	2160	3452	3130	3080	3176	2972	2968	2952	2578	2628	2214
156	210.95524	4.41	209.948	0	0	0	0	0	0	0	0	0	0	0	0	0	0	84	0	0	0	0	0	98	0	0	0	0	0	0	0	0	0	0	0	0	0	0	0	0	0	0	0	0	0	0	0	0	14096
157	411.97794	4.46	410.971	0	322	0	0	0	0	0	0	0	0	0	0	0	0	0	0	0	0	0	0	0	0	0	0	0	0	0	0	0	0	0	0	0	0	0	0	0	110	138	162	0	0	0	166	0	0
158	232.08603	4.56	231.079	2210	1832	1746	0	2172	1078	1540	2688	2452	4236	3772	3958	6388	5926	5508	5144	5320	5348	2438	2284	2048	1326	1692	1600	1210	1010	1214	4436	4364	4086	5758	5364	5204	5586	5842	5606	10682	11130	11670	11914	11138	11704	14016	13018	14512	3752
159	174.08783	4.57	173.081	3288	2782	3524	3670	3190	3696	3362	3766	4180	8808	8708	8918	5826	5726	5990	6112	6752	6614	14014	11896	13208	10226	10690	11410	11286	9258	10288	1682	2466	1786	2442	2472	2728	2472	2576	2708	18364	17590	19914	17106	16516	15722	19564	18086	20406	6206
160	698.21458	4.57	697.207	0	0	0	0	0	0	0	0	0	0	0	0	0	0	0	0	0	0	0	294	0	0	0	0	242	0	0	0	132	0	0	0	0	0	0	0	0	0	0	0	0	0	0	0	0	0
161	433.95842	4.63	432.951	0	0	0	0	0	0	0	0	0	0	0	0	0	0	0	0	0	0	0	0	0	0	0	0	0	0	0	0	0	0	0	0	0	0	0	0	0	0	0	0	0	0	222	0	0	0
162	109.90702	4.67	108.9	0	0	21078	21622	0	21944	20944	20002	19812	11450	10450	9376	0	0	16770	11968	10712	10388	1014	802	0	368	176	228	252	66	144	0	0	0	0	0	0	0	0	0	6722	5756	5528	5150	3936	4528	5518	6348	6576	0
163	228.09879	4.76	227.092	0	0	0	0	0	0	0	0	0	852	1052	766	864	754	862	916	798	0	6920	3800	2880	4342	4426	3974	3616	3782	3394	0	0	0	0	0	0	0	0	0	10070	10702	9682	11166	11042	10312	10268	10182	11394	322
164	280.05445	4.86	279.047	476	528	550	506	516	594	642	502	634	328	438	390	366	468	524	472	450	658	268	0	0	376	0	366	270	302	556	0	0	716	818	788	960	1010	1038	784	0	0	0	0	0	0	0	0	0	0
165	232.00349	4.87	230.996	1718	0	0	0	0	0	0	25832	27174	1876	0	0	0	0	0	0	0	0	3658	6104	3542	3110	2564	2774	2388	2872	2276	0	2356	4238	3484	3220	2710	1668	1780	1692	2074	1584	1894	1512	1666	1588	1438	1416	1284	522
166	83.95093	5.01	82.9437	0	0	0	0	0	0	0	0	0	0	0	0	0	0	0	0	0	0	0	0	0	0	0	0	0	0	0	0	0	0	0	0	0	0	0	0	0	0	0	0	0	0	0	0	0	130
167	207.98530	5.13	206.978	0	0	0	0	0	0	0	0	0	0	0	0	0	0	0	0	138	0	0	0	0	0	0	0	0	0	0	0	0	0	0	0	86	0	166	0	0	0	0	0	0	0	0	0	0	0
168	197.93005	5.29	196.923	0	0	208	0	0	0	0	132	0	0	186	0	184	0	72	0	134	210	0	0	0	1442	1800	2040	2060	2098	2306	128	120	166	0	156	86	0	130	0	0	0	128	0	0	206	0	218	0	0
169	424.19384	5.35	423.187	286	608	504	602	470	410	542	360	464	534	726	762	690	676	718	670	768	752	2874	2732	2480	2016	2018	2028	0	1230	1730	1120	1182	1192	1370	1286	1128	1250	1194	1236	1812	1806	1942	2572	3022	2686	2130	2160	1964	4646
170	370.01474	5.35	369.007	0	0	0	0	0	0	0	0	0	0	0	0	0	0	0	0	0	0	0	0	0	0	0	0	0	0	0	0	0	0	0	0	0	0	0	0	0	0	0	0	0	0	0	0	0	0
171	186.08786	5.48	185.081	270	612	188	338	284	460	324	546	516	966	982	900	1208	914	1116	914	1056	1130	5488	5500	5436	4246	3770	4194	2782	3462	3840	522	490	524	458	894	474	546	564	484	13732	11614	12782	13968	13746	14342	15242	15436	15566	382
172	83.95083	5.52	82.9436	0	0	0	0	0	0	0	0	0	0	0	0	0	0	0	0	0	0	0	0	0	0	0	0	0	0	0	0	0	0	0	0	0	0	0	0	0	0	0	0	0	0	0	0	0	0
173	365.13547	5.53	364.128	0	0	0	0	0	0	0	0	0	138	0	0	194	0	0	156	316	192	0	0	0	0	0	0	0	0	0	0	0	0	0	0	0	0	0	0	0	0	0	0	0	0	0	0	0	0
174	80.96183	5.54	79.9546	154	236	192	1784	1770	0	0	0	0	0	958	962	0	0	0	888	1054	0	1556	1918	1928	4450	4886	4702	4756	5334	5530	2046	1128	1006	768	526	510	532	430	0	0	850	1122	1060	1448	1392	1312	1198	1430	0
175	208.02002	5.62	207.013	0	0	0	0	0	0	0	0	0	322	0	0	0	0	0	0	0	0	448	0	0	0	0	0	0	0	0	0	0	0	0	0	0	0	0	0	0	0	0	0	0	228	0	0	0	0
176	99.96176	5.68	98.9545	0	528	322	396	348	330	0	250	364	500	0	0	0	590	320	0	0	0	1074	1154	0	7266	8814	8476	8976	9300	10014	1908	1120	874	654	562	716	0	0	608	720	760	1132	1276	1536	1698	1604	1488	1480	202
177	204.97858	5.73	203.971	0	198	0	594	0	0	1140	1608	2448	3168	3042	2744	2076	1704	1518	1514	1648	1828	2702	3048	4004	10208	9854	11612	11574	10056	9662	1818	1458	0	0	0	0	0	942	0	1144	1328	1574	1716	1904	1812	1976	1946	2390	234
178	367.94771	5.79	366.94	0	0	0	0	0	0	0	0	0	0	0	0	0	0	0	0	0	0	0	0	386	978	0	0	0	1176	0	0	0	0	0	0	0	0	0	0	0	0	0	0	0	0	0	0	0	0
179	409.95852	5.86	203.972	0	192	1144	670	506	0	1132	1814	2392	3890	2866	2520	2024	1798	1840	1496	1574	2226	2908	2852	3528	9372	0	0	10278	9428	8436	1596	1244	0	0	874	0	1284	0	950	1146	1592	1920	2060	1860	1874	1628	2058	2034	0
180	345.96652	5.9	344.959	0	0	0	0	0	0	0	0	0	0	0	394	0	0	0	0	0	0	0	396	466	0	1326	0	1414	0	1664	0	0	0	0	0	0	0	0	0	0	0	210	0	246	0	144	0	264	0
181	262.14086	5.92	261.134	444	576	456	330	636	454	496	248	674	0	1546	1202	1144	0	312	1208	1190	1052	3034	2624	2516	1770	1906	2140	0	2016	1720	1304	976	1178	1098	1244	1102	1436	1386	1116	2786	2442	2364	2070	2116	0	2660	2562	2772	1930
182	542.15972	6	541.152	118	0	0	0	0	0	0	0	0	0	0	0	0	0	0	0	0	0	0	0	0	0	0	0	0	0	0	0	0	0	0	0	0	0	0	0	0	0	0	0	0	0	0	0	0	0
183	495.99885	6.1	494.992	0	0	0	0	0	0	0	0	0	0	0	0	0	0	0	0	0	0	0	0	0	0	0	0	0	0	186	0	0	0	0	0	116	0	0	0	0	0	0	274	0	0	0	0	0	148
184	218.11448	6.13	217.107	0	0	0	0	0	0	0	0	0	2502	2118	2560	2114	2286	2486	0	0	2550	21906	20864	20228	13346	12940	13410	11844	11982	13400	0	0	0	0	0	0	0	0	0	3118	6838	6982	6644	6668	6040	7188	7520	8288	2632
185	527.18853	6.2	526.181	0	0	0	0	0	0	0	0	0	0	0	0	0	0	0	0	0	0	0	0	278	0	382	608	0	0	0	0	0	0	122	0	122	0	0	0	0	0	0	0	470	0	302	0	0	0
186	239.94911	6.24	238.942	0	0	0	0	0	0	0	0	0	0	0	0	0	0	0	0	0	0	0	0	0	180	0	0	0	244	0	0	0	0	0	0	0	0	0	0	0	0	0	0	0	0	0	0	0	0
187	86.03449	6.32	85.0272	0	1100	0	1094	0	0	1228	1226	1224	0	0	0	452	598	588	1014	934	0	1022	0	542	640	402	498	408	186	292	734	0	556	0	766	884	992	712	0	0	0	1112	926	1012	0	0	1012	0	344
188	326.00414	6.33	324.997	302	0	0	0	0	0	0	0	0	0	358	0	0	0	0	0	0	0	0	0	0	0	0	0	0	0	0	0	0	0	0	0	0	0	138	0	0	0	0	0	0	0	0	0	0	3542
189	268.04503	6.36	267.038	0	0	0	306	0	0	0	0	0	836	872	920	446	0	648	796	0	1002	0	748	0	0	0	0	0	0	0	0	0	0	0	0	0	0	0	0	880	1042	962	750	0	876	400	784	930	5610
190	232.13041	6.61	231.123	762	902	942	330	916	812	918	732	802	1570	1810	1620	1798	1936	2022	1762	2198	1956	14570	13796	12548	9054	9726	8168	8616	7706	7656	888	728	668	758	750	1058	1160	938	946	6660	6522	6090	6416	7462	6814	6802	7174	7970	1514
191	409.95925	6.73	203.972	0	236	1148	470	212	870	1124	1936	2836	3668	3058	2794	2342	2238	1726	1774	1868	2382	3200	3748	4088	10370	10936	11080	11208	10236	9382	2218	1382	1106	0	0	0	0	1096	1156	1310	1512	1728	1896	1898	1892	1954	2318	2390	226
192	129.89740	6.8	128.89	10036	9258	11828	11058	0	10878	0	8008	7240	3958	3380	3460	4782	4302	3766	0	0	0	276	324	162	132	114	140	0	0	68	1558	1970	2362	2366	2280	2796	3114	2974	3104	0	800	0	394	0	600	0	0	0	4536
193	127.91039	6.83	126.903	0	0	1302	0	998	0	0	0	0	0	0	0	0	0	0	0	0	0	1522	1386	1460	0	0	1226	0	0	1114	0	0	0	1204	1118	1558	1786	1594	1500	1104	1034	1268	1122	0	0	962	918	930	606
194	183.05563	7.04	182.048	0	0	0	0	0	0	0	0	0	1030	808	0	1574	1846	1542	2050	2088	2206	0	98	0	0	122	0	0	0	0	0	0	0	0	0	0	0	0	0	496	508	458	442	290	368	464	0	610	0
195	217.91550	7.05	216.908	0	0	0	0	0	0	224	0	0	0	0	138	210	0	0	0	0	0	0	152	212	2524	3188	2844	3230	2820	3426	970	182	202	0	0	140	0	0	0	0	124	0	490	0	0	0	512	628	0
196	95.92967	7.09	94.9224	10402	0	10876	0	11310	10764	9910	9484	0	8592	7794	8644	7518	7948	7288	6298	5588	6002	0	0	0	314	194	200	204	108	74	3988	4684	5226	5482	5500	6218	5874	5684	6188	2534	2052	2206	1734	1488	1536	2298	1830	2074	0
197	527.18849	7.2	526.181	0	0	0	0	0	0	0	0	0	0	122	118	0	0	0	0	0	0	0	0	472	0	0	0	0	0	348	0	0	0	0	0	0	0	0	0	0	0	0	0	0	184	0	248	0	150
198	297.76632	7.26	296.759	0	0	0	0	0	0	0	0	0	0	0	0	0	0	0	0	0	0	0	0	0	0	0	0	0	0	0	0	0	0	0	0	0	0	0	0	0	0	0	0	0	0	0	0	0	0
199	204.97886	7.27	203.972	0	166	1184	478	526	0	1092	1876	2988	3546	3034	2916	2380	1738	1746	1704	2386	2346	3218	3548	3806	9836	10884	10966	10472	11112	8404	2516	1498	1150	0	992	1060	1340	1058	0	0	1448	1950	2000	1820	2036	2264	2506	2220	370
200	127.91033	7.35	126.903	1918	1402	0	0	0	0	0	0	0	0	0	0	818	0	0	0	1102	0	1330	1320	0	1168	0	1158	0	1146	1022	0	0	0	1096	1144	1052	1266	1202	0	0	0	0	1034	1034	0	1014	938	0	0
201	285.89581	7.4	284.889	0	0	286	370	176	376	254	276	0	0	0	0	0	0	0	84	0	0	0	0	0	0	0	320	244	268	0	210	266	248	382	348	244	0	290	404	0	0	0	0	0	0	0	0	0	0
202	195.93380	7.4	194.927	0	0	130	0	0	0	0	0	0	176	96	148	0	0	148	134	166	178	170	112	372	4820	4908	5558	0	7584	6802	0	226	318	0	148	220	0	0	150	228	0	264	0	454	0	0	574	0	0
203	249.00110	7.63	247.994	140	396	216	378	426	250	470	486	416	230	0	0	240	458	0	634	0	336	190	2120	6038	4824	5982	7834	7018	7728	8612	0	0	0	0	1180	0	1154	1140	1352	0	0	0	316	290	536	294	380	322	166
204	267.80987	7.65	266.803	0	0	0	0	0	678	624	540	492	0	0	0	0	0	896	700	604	0	0	0	0	0	0	0	0	0	0	1212	0	698	0	570	500	530	0	0	124	204	416	284	222	464	470	544	524	11144
205	367.94721	7.99	366.94	0	0	0	0	0	0	0	0	0	0	0	0	0	0	0	0	0	0	94	240	762	0	2496	2466	3058	0	3230	0	0	0	0	0	0	0	0	0	0	0	0	0	0	0	0	0	0	0
206	517.97922	8.08	516.972	0	0	0	0	0	0	0	0	0	0	0	0	0	0	0	0	0	0	0	152	0	612	554	750	0	0	0	0	0	0	0	0	0	0	0	0	0	84	0	0	0	0	0	0	0	0
207	495.99754	8.11	494.99	0	0	0	0	0	0	0	0	0	0	0	0	0	0	0	0	0	0	0	0	360	384	688	286	726	442	0	0	0	0	0	0	0	0	0	0	0	0	0	0	0	0	0	0	0	0
208	136.03519	8.15	135.028	1766	2562	2164	1998	2546	2140	2446	2274	2358	0	0	1020	892	0	934	0	0	974	1026	1190	0	958	0	0	0	998	0	1716	3308	3264	3914	4160	3410	3658	3572	3804	0	0	0	628	890	0	0	606	608	566
209	390.13681	8.25	389.13	0	0	0	0	0	0	116	0	0	0	0	0	0	0	0	0	0	0	0	0	0	0	0	0	0	554	0	0	176	0	140	0	0	0	0	0	0	0	582	0	0	0	0	0	0	0
210	574.27413	8.28	573.267	0	0	0	0	0	128	0	0	128	0	0	0	0	0	0	0	0	0	0	0	0	0	0	0	0	0	292	0	0	0	0	0	0	0	0	0	0	0	0	0	450	0	0	0	0	6380
211	183.05485	8.37	182.048	0	0	0	0	0	0	0	0	0	0	920	1006	1630	1542	1574	1984	2124	2290	0	0	0	0	0	0	0	0	0	0	0	0	0	0	0	0	0	0	508	388	434	572	400	382	620	460	382	0
212	342.20432	8.38	341.197	276	236	162	118	90	186	292	374	314	0	1092	0	1272	0	1440	0	1200	1260	18550	19392	17624	14010	14272	15520	13046	12354	11856	1154	1212	0	1240	0	0	1496	1120	0	3550	3560	4116	4182	3828	4036	5076	4238	5014	1036
213	398.01468	8.43	397.007	0	0	0	0	0	0	0	0	0	0	0	0	0	0	216	214	434	496	0	0	0	0	0	0	0	0	344	0	0	0	0	0	0	0	0	0	0	0	0	198	0	0	0	0	0	0
214	442.18628	8.43	441.179	0	0	0	0	0	0	0	0	0	0	0	0	0	0	0	0	0	0	1960	2326	2932	12202	14200	14312	13298	13026	14766	0	0	0	0	0	0	0	0	0	0	0	0	0	1168	1726	1188	1284	0	0
215	300.19236	8.56	299.185	232	318	278	166	250	248	164	218	254	362	310	488	480	416	356	182	326	226	1624	0	1206	1120	1662	1232	1046	1192	1046	0	156	0	216	216	0	280	310	294	1410	1620	1476	1874	2278	1740	2182	1864	0	2012
216	232.00415	8.57	230.997	1796	13708	0	7238	4718	4264	5370	2832	2806	3114	0	0	10434	0	0	0	0	0	6402	5020	3658	3484	3640	3984	3372	3648	3016	1414	1660	1910	2048	1810	1844	1938	1876	1846	2274	2030	2116	2770	2066	2030	2016	2136	1754	0
217	81.92185	8.6	80.9146	0	0	0	0	0	0	0	0	450	0	0	0	0	0	0	0	0	178	0	0	0	614	0	0	444	0	0	442	520	376	290	166	0	538	0	0	196	0	0	334	400	0	484	434	306	0
218	495.99960	8.62	494.992	0	0	0	0	0	0	0	0	0	0	0	0	0	0	0	0	0	0	0	0	630	0	0	0	0	0	1554	0	0	0	0	0	0	0	0	0	134	0	0	116	0	0	0	0	0	0
219	202.11924	8.64	201.112	1702	2422	2260	2670	2608	2144	1862	2450	2474	3326	3694	3730	3176	3426	3342	3050	2966	3026	27200	28836	27896	21774	23606	23344	21262	19520	19904	1598	1938	1816	1576	2074	1590	1932	1966	2466	11952	11608	12318	11434	10706	10662	12882	14114	13352	3198
220	99.96123	8.69	98.954	0	298	400	320	222	162	326	116	360	348	414	508	570	510	272	374	430	604	874	0	0	5350	6352	6572	7396	7126	8648	1572	0	596	0	568	530	490	314	446	804	484	0	1292	1418	1224	1432	1474	1370	244
221	201.99188	8.81	200.985	108	166	0	0	0	150	0	0	146	0	0	0	0	0	0	0	0	0	0	0	0	0	700	1096	0	0	0	226	184	0	0	162	138	0	114	0	0	0	128	0	0	0	0	128	0	0
222	170.99423	8.86	169.987	1362	0	0	0	0	0	0	0	0	0	1730	1648	0	0	0	0	0	0	2730	2026	6656	2162	1294	0	0	0	0	0	0	0	0	0	0	0	0	0	0	0	1632	0	0	0	0	0	106	0
223	278.10215	8.93	277.095	0	166	0	210	0	0	0	0	0	0	0	0	196	0	190	342	0	328	0	0	0	0	0	0	0	0	0	0	0	204	0	0	0	0	0	228	0	294	0	0	0	0	390	436	0	0
224	390.13640	9.01	389.129	0	0	0	0	0	0	0	0	0	248	0	0	0	0	0	0	0	0	0	0	0	0	0	0	0	0	0	0	0	0	166	0	0	0	132	0	0	0	0	0	0	0	0	0	0	0
225	80.96298	9.3	79.9557	166	0	222	1988	1524	1288	0	0	0	1044	0	1220	986	0	1188	0	0	1156	1542	1516	1988	5342	5014	5264	5272	6132	5902	2012	1308	0	0	0	370	334	0	0	1024	930	1242	1406	1376	1382	1626	1336	1922	0
226	201.99231	9.32	200.985	0	108	130	152	0	0	0	0	230	0	0	0	0	0	224	0	52	0	106	0	0	0	1136	1464	0	1460	1554	258	152	240	174	70	188	0	178	58	74	0	90	0	0	0	136	0	0	0
227	343.75521	9.34	342.748	0	0	0	0	0	0	0	0	0	0	0	0	0	0	0	0	0	0	0	0	0	0	0	0	0	0	0	0	0	0	0	0	0	0	0	0	0	0	0	0	0	0	120	0	0	0
228	221.83517	9.37	220.828	0	0	0	0	0	0	0	0	0	0	0	0	0	0	0	0	0	0	0	0	0	0	0	0	0	0	0	0	0	0	0	0	0	0	0	0	0	0	0	0	0	0	0	0	0	0
229	342.20392	9.5	341.197	372	350	290	352	348	282	296	288	256	0	1140	0	0	1344	1230	0	0	0	18312	17726	17178	11926	13294	12568	11446	11538	9444	0	0	0	1228	0	1142	0	0	1002	3082	3118	3102	3494	3320	3142	3748	3766	3868	1146
230	220.05160	9.69	219.044	0	0	0	32908	0	0	0	0	0	0	6416	0	0	6812	0	7892	6870	6952	0	0	0	0	0	0	0	0	0	10994	11566	11672	0	0	12092	0	13764	0	1020	0	0	0	834	526	1002	0	0	0
231	345.96645	9.82	344.959	0	0	0	0	0	0	0	0	0	0	0	0	0	0	0	0	0	0	224	192	632	3698	4520	5780	7662	8180	10168	0	0	0	0	0	0	0	0	0	0	0	0	0	0	0	0	0	0	0
232	80.96254	9.82	79.9553	84	314	172	2360	1968	0	1016	0	960	0	1200	1214	1182	1220	1164	1248	1038	0	2114	1608	1852	5328	5418	4694	4788	5244	6302	1734	0	0	906	0	0	470	0	766	840	918	1400	1344	1356	1416	1430	1622	1636	0
233	163.97548	9.85	162.968	0	0	0	0	0	220	0	0	0	1124	1168	0	1264	1432	1324	1214	1554	1320	2798	2310	2604	8528	7736	9050	9068	11070	12506	3664	2284	2150	1840	1118	0	514	390	926	1652	1784	2628	2788	3758	4284	3794	4318	3682	1004
234	390.13808	9.87	389.131	0	0	0	0	0	0	0	0	0	0	0	0	0	0	0	0	0	0	0	0	0	0	0	0	0	0	0	0	0	0	0	0	0	0	0	0	0	0	502	0	0	0	310	0	674	0
235	201.99260	9.94	200.985	228	68	118	0	186	0	0	0	0	0	0	0	0	180	0	174	0	0	318	1142	1902	1512	2292	2090	1936	2972	2880	288	342	66	236	176	160	0	220	164	0	0	0	0	0	0	0	208	150	234
236	200.14002	9.96	199.133	298	466	222	170	170	274	202	240	82	344	948	602	0	0	1004	0	972	0	13642	14120	14392	11994	12098	13252	11890	11126	12612	0	0	0	0	0	648	0	642	738	1388	1510	1752	1476	1614	1594	2194	2022	1922	928
237	221.83598	10.1	220.829	0	0	0	0	0	0	0	0	0	0	0	0	0	0	0	0	0	0	0	0	0	0	0	0	0	0	0	0	0	0	0	0	0	0	0	0	0	0	0	0	0	0	0	0	0	0
238	169.84133	10.13	168.834	1660	1368	0	0	0	0	0	0	2288	2468	2562	2350	2582	2190	2342	3688	2796	2556	1952	2124	1930	2974	3762	4250	4882	5082	4622	0	1478	1272	1182	1606	1490	0	0	0	1498	0	0	1212	1422	0	1154	1198	0	2958
239	422.15984	10.25	421.153	0	0	0	0	0	0	0	0	0	0	0	0	0	0	0	0	0	0	0	0	1840	2452	2300	2596	2670	2454	3058	0	0	0	0	0	0	0	0	0	0	0	0	0	0	0	0	0	0	0
240	220.97441	10.3	219.967	0	0	0	1612	1424	912	746	464	0	908	890	810	834	796	732	0	0	0	0	0	872	1754	1794	1854	1728	1776	1716	0	550	332	186	0	0	0	0	0	302	230	380	414	204	406	374	488	352	0
241	266.11536	10.3	265.108	372	0	0	0	0	0	0	0	170	0	0	0	0	0	150	0	0	0	11482	9774	9162	3444	6910	5438	4456	5314	4550	0	160	0	306	0	198	0	0	334	372	0	520	0	578	0	654	628	454	0
242	170.12875	10.38	169.121	0	0	224	0	0	0	300	0	0	376	550	0	308	172	420	0	252	0	458	710	268	362	248	320	356	236	314	252	156	0	0	146	132	276	306	0	614	562	972	288	670	710	1032	476	720	132
243	278.15136	10.51	277.144	0	0	0	0	0	0	0	166	0	0	200	0	336	238	310	306	440	480	10354	10030	7910	6534	6854	6612	6112	6060	5934	234	404	0	0	0	0	228	0	0	702	880	980	954	1032	988	1086	1012	1300	872
244	360.08415	10.54	359.077	0	0	0	0	0	0	0	0	0	0	0	0	856	750	828	24124	20916	22046	0	0	0	0	0	0	0	0	0	0	0	0	0	0	0	0	0	0	0	0	0	0	0	0	0	0	0	0
245	327.95044	10.56	162.968	0	0	0	0	0	0	0	328	608	1198	1496	1572	1352	1430	1440	1306	1274	1382	2132	2002	2848	7118	7930	8038	8702	11594	12444	3936	4032	2868	1730	1170	734	504	548	1082	1816	2082	2634	3084	3648	4278	3348	3496	4482	1100
246	81.92193	10.62	80.9146	980	1202	1010	0	0	0	954	902	0	0	0	0	0	514	0	356	380	460	0	0	0	488	480	520	616	0	0	0	310	0	370	0	0	0	524	0	478	436	0	0	450	360	0	0	572	634
247	216.13484	10.65	215.128	11292	8746	9716	9922	10128	9332	9208	9830	9384	10682	9644	10262	8312	8866	8416	7266	8362	7292	29690	28108	24628	23260	23978	24992	22030	20514	21636	3582	3434	4934	5160	4652	4452	3914	4586	4238	48326	45782	47368	46280	45574	46658	53530	48574	51368	2670
248	424.17682	10.66	423.17	0	0	0	0	0	0	0	0	0	0	0	0	0	0	0	0	0	0	0	1498	4010	3852	3002	3460	3252	3758	3630	0	0	0	0	0	0	0	0	0	0	0	0	0	0	0	0	0	0	0
249	318.06201	10.71	317.055	27944	23984	17864	10528	6886	5432	5718	4906	4440	6070	7170	7926	6544	7814	8714	8508	8686	0	7188	7550	0	7410	6080	6030	5926	4732	5450	3372	2714	2786	2260	2302	2232	2016	1926	1880	2104	2222	2642	2458	2502	2474	2128	2198	2160	1230
250	352.17293	10.97	351.166	0	0	0	0	0	0	0	0	0	0	0	0	0	0	0	0	0	0	0	0	0	0	0	0	0	866	0	0	0	0	0	0	0	0	0	0	0	0	0	0	0	0	0	0	0	0
251	228.13542	11.11	227.128	1374	1434	1192	1436	1388	1174	1404	1146	1444	1538	1800	1848	4008	3788	3940	3170	3560	3422	3102	2864	2740	2058	2416	2084	2068	1834	2346	1860	1540	1560	1780	1726	2126	1870	1878	1942	13646	14550	13560	15204	14712	15670	15462	17060	18398	1318
252	700.30268	11.13	699.295	0	0	0	0	0	0	0	0	0	0	0	0	0	474	0	0	0	0	0	0	0	0	0	0	924	0	0	0	0	0	0	0	0	0	0	0	0	0	0	0	658	1128	0	0	0	1166
253	598.22791	11.14	597.221	0	0	0	0	0	0	0	0	0	0	0	0	0	0	0	0	0	0	0	0	0	0	1444	1404	1096	936	906	0	0	0	0	0	0	0	0	0	0	0	0	0	0	0	0	0	0	0
254	536.23698	11.15	535.23	564	426	786	714	452	392	646	628	342	744	0	0	844	968	0	866	0	494	0	0	1262	1204	1340	1512	1436	1484	1204	0	408	0	332	0	0	0	0	0	0	0	0	1280	0	996	0	892	888	1078
255	608.16673	11.2	607.159	0	0	0	288	0	0	0	0	0	0	0	0	0	0	0	0	0	0	0	4608	13798	15738	16712	17162	17092	17704	15952	0	0	0	0	0	0	0	356	0	0	0	0	0	0	0	0	0	0	0
256	722.35060	11.21	721.343	318	0	0	0	0	0	0	0	0	0	0	0	0	0	0	0	0	0	10276	9344	7608	5374	5156	0	5872	6726	5808	0	0	0	0	0	0	0	0	0	718	0	0	0	0	944	1012	0	0	0
257	724.36159	11.21	723.354	0	0	0	0	0	0	0	0	0	0	0	0	0	0	0	0	0	0	17744	15934	12072	10592	10754	9832	10634	10382	10640	0	0	0	0	0	0	0	0	0	0	0	0	0	0	1142	0	0	0	686
258	460.15053	11.21	459.143	0	0	0	0	0	0	0	0	0	0	0	0	0	896	0	0	0	0	1968	2886	0	21136	24646	23936	26048	31348	34100	1088	0	0	0	0	646	0	0	0	0	0	0	0	0	0	0	0	0	0
259	610.17925	11.21	609.172	0	0	0	364	0	0	0	0	0	362	0	324	0	0	0	0	0	0	5706	9276	29870	34348	34654	34708	35930	40456	38260	0	0	0	0	0	0	0	0	0	0	0	0	0	0	0	0	0	0	0
260	311.81439	11.23	310.807	0	0	0	0	0	0	0	0	0	0	0	0	0	0	0	0	0	0	0	0	0	0	0	0	0	0	0	0	0	0	0	0	0	0	0	0	0	0	40	0	0	0	0	0	0	0
261	428.20724	11.27	427.2	0	0	0	0	0	0	0	0	0	0	0	0	0	0	0	0	0	0	1476	0	1416	3014	3248	3504	4398	3832	4286	0	1112	0	0	0	0	0	0	0	0	1358	2582	0	2002	2688	2496	2110	2478	0
262	708.38624	11.27	707.379	0	0	0	0	0	0	0	0	0	0	0	0	0	0	0	0	0	0	0	0	0	0	0	0	0	0	0	0	0	0	0	0	0	0	0	0	0	0	840	0	794	0	0	0	0	8086
263	304.16680	11.3	303.16	0	0	0	0	0	0	0	0	0	0	446	0	592	474	732	0	842	346	25580	25964	21250	17372	19118	18180	16964	18296	16400	506	786	582	0	296	358	566	0	0	534	1162	788	848	0	1344	1198	0	1208	0
264	548.28150	11.32	547.274	654	0	0	0	0	0	608	514	0	0	0	408	1070	568	592	670	0	0	892	1032	760	828	720	0	768	0	0	0	0	0	0	0	0	0	0	0	0	0	774	990	986	924	790	1048	0	8522
265	238.15618	11.33	237.149	204	228	0	540	0	0	328	0	424	1128	974	1208	1416	1224	1172	1238	1334	1196	4130	4572	4992	3626	4056	4226	3248	4730	3638	804	738	0	742	744	470	792	410	550	1256	1318	1266	1444	1858	1646	1972	1518	1882	1772
266	183.05565	11.43	182.048	0	0	0	0	0	0	0	0	0	4026	4584	4404	9094	8456	8668	2690	2228	2192	0	0	200	0	0	0	0	0	0	0	0	0	0	0	0	0	0	0	290	390	448	400	346	424	346	298	328	0
267	540.26162	11.49	539.254	754	0	630	678	0	0	0	530	0	802	1272	822	610	0	1300	942	0	886	1100	838	0	1056	0	0	1158	1144	1060	0	0	0	0	0	0	0	0	0	0	0	1108	1164	0	1382	1336	1172	0	10474
268	212.03443	11.55	211.027	0	0	0	1492	1796	1444	1862	0	1358	1872	1580	0	0	0	686	0	396	0	0	424	446	420	248	334	268	364	0	0	0	328	0	714	396	584	694	0	624	0	982	968	0	0	0	0	0	178
269	352.17371	11.56	351.166	0	0	0	0	0	0	0	0	0	0	0	0	0	0	0	0	0	0	0	976	0	0	0	0	0	0	0	0	0	0	0	0	0	0	0	0	0	0	0	0	0	0	0	0	0	0
270	540.26727	11.6	539.26	0	1114	968	882	1374	1238	1190	802	508	1146	550	1342	1568	1020	1212	0	0	658	1388	1596	1112	656	0	0	0	0	0	0	0	416	0	432	604	0	0	0	0	0	0	1728	1560	860	1058	1270	1600	20552
271	378.24007	11.61	377.233	1484	1196	1154	1464	1122	1244	1176	1308	0	18330	20008	19148	5634	6390	5416	3364	3144	3390	2548	0	0	0	2288	2148	2404	1922	1732	0	0	0	0	0	0	286	0	0	1298	0	0	0	0	0	0	0	0	0
272	728.33321	11.64	727.326	0	0	0	0	512	1518	0	0	0	2680	3192	2838	4988	2854	1952	2652	3338	3588	0	0	0	0	1186	770	0	1156	1158	0	1222	992	944	0	1002	1320	0	1168	1814	0	2038	3566	2630	2622	2376	2434	2668	1334
273	564.26927	11.64	563.262	5362	4394	5002	6288	6682	0	4412	4804	4110	9396	9864	9430	15902	17218	16524	12956	11832	10638	0	1360	0	1316	0	0	0	1042	0	3896	4402	5364	5612	5482	5758	5600	5700	6258	6844	6762	6474	9306	9348	8506	7258	6778	6998	852
274	574.29787	11.64	573.291	1502	806	662	1482	1566	0	1298	0	1086	0	3122	3242	4960	4754	4580	3890	4056	3860	1836	0	0	1304	0	1692	1208	1404	1668	2896	2632	2618	2310	2340	2010	2582	2028	0	2832	2922	2992	4562	4384	4740	3892	3630	3670	0
275	576.31183	11.75	575.305	0	1466	1506	1690	0	1112	756	606	950	1898	1728	1536	1940	1798	1994	1816	1880	1960	1506	1372	0	1412	0	0	1372	0	0	2068	1906	1736	1978	1738	1780	1620	0	1450	1582	1718	1160	1728	1794	2040	986	1658	1652	2208
276	796.48908	11.76	795.482	0	0	0	0	0	0	0	0	0	0	0	0	0	0	0	0	0	0	0	0	0	0	0	0	0	0	0	0	0	0	0	0	0	0	0	0	0	0	0	0	0	0	0	0	0	0
277	566.28433	11.76	565.277	3872	0	4658	5688	4490	5414	3940	4384	3642	4568	4296	4364	5764	0	0	4538	5358	4906	1862	1444	1036	0	974	0	0	0	0	3128	2936	2910	4438	3578	3546	3782	3694	0	2666	2874	2452	2802	3330	3130	2766	2848	2518	4376
278	331.18142	11.81	330.174	0	0	0	0	0	0	0	0	0	516	904	706	742	882	246	780	638	0	0	0	0	340	188	0	0	0	0	0	0	0	0	270	208	0	232	0	808	702	522	636	712	690	686	596	586	0
279	182.07773	11.81	181.07	0	0	0	0	0	0	0	0	0	18610	18966	19026	18180	18392	0	13446	8528	8618	0	0	616	466	444	584	422	0	266	0	0	0	0	0	17982	0	0	0	1224	1306	1214	1254	1006	1092	988	1364	1100	698
280	660.47693	11.86	659.47	0	0	142	0	0	0	0	0	0	0	0	0	0	0	0	0	0	0	12248	12162	9180	5486	6128	6300	0	0	5430	0	0	0	0	0	0	258	0	0	0	0	0	0	0	0	0	0	0	0
281	682.29223	11.86	681.285	0	0	0	0	0	0	0	0	0	0	0	0	524	0	0	626	0	0	0	0	0	0	0	0	0	846	0	0	0	0	0	0	0	0	0	0	0	0	0	0	0	0	0	0	0	0
282	864.45327	11.87	863.446	0	0	636	0	0	0	0	692	0	0	0	0	0	0	0	0	588	0	1032	0	0	0	0	0	928	0	0	0	0	0	0	0	0	0	0	0	778	904	756	806	1074	812	870	898	0	0
283	744.28214	11.87	743.275	0	0	0	0	0	0	0	0	0	0	0	0	0	0	0	0	0	0	0	0	0	0	0	0	0	0	0	0	0	0	0	0	0	0	0	0	0	0	0	0	0	0	0	0	0	0
284	214.01005	11.87	213.003	710	5306	6214	0	8542	0	11714	11352	11056	1982	4396	4550	3218	3530	3512	2888	3016	2714	1626	1888	2190	862	582	780	552	628	308	398	580	0	1168	0	0	0	0	1226	1064	1446	1460	1242	1458	1804	1548	1654	1490	0
285	576.22242	11.88	575.215	0	0	0	0	0	0	0	0	0	0	0	0	0	0	0	0	0	0	2082	4488	13894	13210	14536	14964	14420	12360	13458	0	0	0	0	0	0	0	0	0	0	0	0	0	0	0	0	0	0	0
286	658.46091	11.91	657.454	0	0	0	0	0	0	0	0	0	0	0	0	0	0	0	0	0	0	14802	13758	10360	7736	8352	8402	6804	6770	7826	0	0	0	0	0	0	0	0	0	0	0	0	0	0	0	0	0	0	0
287	618.28651	11.92	617.279	0	0	0	0	0	0	0	0	0	0	0	0	708	0	624	0	0	894	0	0	0	0	0	0	0	0	0	0	0	0	0	0	0	0	0	0	0	0	0	0	0	0	0	0	0	0
288	608.25826	11.92	607.251	0	0	0	0	0	0	0	0	0	0	0	0	0	0	0	942	0	700	0	0	0	0	0	0	0	0	0	0	0	0	0	0	0	0	0	0	0	0	0	0	0	1162	0	0	0	0
289	670.24697	11.92	669.24	0	0	0	0	0	0	0	0	0	0	0	0	0	0	0	0	0	0	0	0	0	0	0	0	0	0	0	0	0	0	0	0	0	0	0	0	0	0	0	0	0	0	0	0	0	0
290	656.44518	11.93	655.438	0	0	0	0	0	0	0	0	0	0	0	0	0	0	0	0	0	0	10962	11378	9058	5958	6768	6172	5540	6000	5626	0	0	0	0	0	0	0	0	0	0	0	0	0	0	0	0	0	0	0
291	568.29563	11.94	567.288	4742	5018	5792	6400	0	6836	3932	4620	4544	6220	5696	5278	8842	9536	8134	7220	6698	6880	1228	0	1222	1118	1102	1384	0	0	0	2196	3222	3144	0	3868	4310	3662	3848	4322	2924	2470	2248	2916	2546	3202	2682	2748	2566	4408
292	578.32861	11.96	577.321	1940	928	0	1678	1550	0	0	0	1366	1838	1688	1798	2754	2568	3184	3056	2490	2600	1354	1402	0	0	0	0	0	0	0	1832	1764	1790	1336	1616	1624	1596	1426	1202	1322	1570	1574	0	1614	1658	0	1406	1708	2322
293	262.01375	11.99	261.006	2316	1398	2400	2748	2692	2870	3180	2936	3752	2830	3252	6698	5696	4892	4414	4278	4654	3930	2884	1278	1592	1008	0	916	814	670	854	0	0	0	0	0	0	1066	0	940	524	308	370	594	510	406	246	382	442	260
294	684.30870	12.02	683.301	0	0	0	0	0	0	0	0	0	0	0	0	850	0	0	0	0	0	0	0	0	0	0	0	0	0	0	0	0	0	0	0	0	0	0	0	0	0	0	0	0	0	0	0	0	1984
295	776.46524	12.03	775.458	0	0	0	0	0	0	0	0	0	0	0	0	0	0	0	0	0	0	0	0	0	0	0	0	0	0	0	0	0	0	0	0	0	0	0	0	0	0	0	0	0	0	0	0	0	0
296	340.12480	12.03	339.118	0	0	0	0	342	0	0	0	0	0	0	0	0	0	0	0	0	0	0	0	0	0	0	0	0	0	0	0	0	0	0	0	0	0	0	0	0	0	0	0	0	0	0	0	0	0
297	520.24343	12.03	519.236	0	1428	1480	1330	0	1752	0	1824	0	0	0	0	0	0	0	0	2692	0	3178	0	2154	1608	1906	1514	0	1780	1356	0	0	0	0	0	0	0	0	0	0	1176	0	0	0	0	1562	1940	0	0
298	530.27155	12.04	529.264	2664	0	2172	0	2376	0	0	0	0	0	1788	0	0	1692	2288	2244	0	1804	3316	3420	3180	3016	3426	3246	2774	3200	2870	1450	1314	1604	2094	1298	1496	0	854	0	0	0	1262	0	1172	1356	1774	1114	0	0
299	307.86730	12.08	306.86	0	0	246	194	296	164	62	192	304	0	0	0	0	0	0	0	0	0	0	0	0	0	0	0	0	0	0	0	0	64	0	0	0	0	68	0	0	0	0	0	98	0	0	0	0	214
300	596.20355	12.08	595.196	0	0	318	0	304	0	0	0	0	0	0	0	0	0	0	0	0	0	1756	2786	10182	10532	11472	10350	12302	12368	10330	0	502	0	0	0	428	0	0	0	0	0	0	0	0	0	0	0	0	0
301	309.86689	12.08	308.86	344	472	364	0	444	338	486	0	388	0	0	0	0	0	0	0	0	0	0	0	0	0	0	0	0	0	0	0	0	0	0	0	0	0	0	0	0	0	0	0	0	0	0	0	0	276
302	80.96265	12.09	79.9554	264	212	186	1338	836	1126	0	0	358	0	0	0	0	0	0	394	0	0	960	0	0	1338	0	1292	1544	1368	1916	0	536	0	608	222	0	142	228	256	392	0	0	0	644	0	0	0	0	222
303	588.43846	12.12	587.431	0	0	0	0	0	0	0	0	0	0	0	412	0	1104	0	0	1052	996	1804	0	0	1688	1682	1830	0	0	0	0	0	0	0	0	456	0	0	0	590	1012	974	1358	1386	1258	1342	0	1566	0
304	220.05128	12.12	219.044	0	0	0	28042	0	28906	0	0	0	14534	0	0	0	0	0	0	7756	6000	0	0	0	0	0	0	0	0	0	15176	0	17000	0	0	12404	0	0	0	0	0	0	416	574	568	400	472	594	0
305	848.47919	12.13	847.472	0	0	0	0	480	0	340	0	0	0	0	0	468	0	0	0	0	0	1056	912	0	0	0	0	0	948	1336	462	610	854	796	650	1202	890	0	0	1708	0	0	1524	0	0	0	0	1078	0
306	532.28744	12.15	531.28	1466	1200	1336	0	0	0	0	0	0	638	0	0	0	0	0	0	0	0	952	0	0	1108	0	0	464	0	828	0	0	0	0	0	0	0	0	0	1172	0	0	0	1082	1318	974	0	988	21306
307	522.25781	12.16	521.251	1796	2234	1880	0	2002	1580	0	0	0	0	0	0	0	2244	1508	0	1022	0	0	1202	0	1344	1178	858	1108	1818	1680	0	694	750	0	0	0	0	0	0	0	0	1432	1178	1298	1266	0	1270	1264	29168
308	710.32240	12.2	709.315	0	0	3904	0	0	0	0	4126	3990	14144	13542	0	17796	16998	18792	13862	13178	12474	0	0	0	0	0	0	0	0	0	0	10488	10828	12632	14364	13502	12192	12106	13240	0	3642	3070	3896	4404	3806	3562	3210	0	0
309	408.26184	12.21	407.255	0	0	0	0	0	0	0	872	0	1218	0	0	0	0	0	0	0	0	0	0	0	0	0	0	0	920	0	0	0	0	656	0	0	0	0	0	0	0	0	0	0	0	0	0	0	2754
310	418.29278	12.21	417.286	0	0	510	580	0	0	0	0	0	0	428	0	512	0	0	0	0	0	0	0	0	0	0	0	0	0	0	0	516	0	0	0	0	302	0	0	0	0	0	0	0	0	0	0	0	0
311	830.45973	12.22	829.452	0	0	0	0	0	0	0	0	0	0	0	0	0	0	0	0	0	0	0	0	0	0	0	0	0	0	0	342	0	0	0	0	0	0	0	0	1240	1330	740	698	676	1144	828	0	0	0
312	46.01491	12.22	45.0076	3184	0	0	2368	3150	0	1854	0	0	0	0	5896	0	0	0	0	0	0	0	0	0	0	0	0	0	0	0	0	0	0	0	0	0	0	0	0	0	0	0	0	0	0	0	0	0	0
313	280.17089	12.22	279.164	1780	1854	0	1964	1702	1748	1786	0	0	2276	2332	2574	1634	1962	3176	2792	3860	4042	8508	2888	5010	3598	0	5044	4028	3404	3506	4722	3766	2864	3630	2912	3064	2048	2106	2186	1792	0	2002	2522	2264	0	2994	2360	2198	2254
314	556.34479	12.24	555.338	0	0	0	0	0	0	0	0	0	0	0	0	0	0	0	0	0	0	0	0	0	0	0	0	0	0	0	0	0	0	0	0	0	0	0	0	0	0	0	0	0	0	0	0	0	9262
315	46.00520	12.24	44.9979	0	2966	3290	0	0	2158	0	1922	1504	5820	6020	0	5640	4960	5458	5830	7238	8292	5472	5538	5004	6102	7624	5364	6866	6108	7368	17738	15578	13164	12170	13098	12950	8076	7386	8066	5674	4960	4764	2420	2082	2068	5068	4406	4436	11278
316	324.17864	12.25	323.171	7574	6884	6348	4434	5028	4382	0	1500	1506	24754	25682	20616	20076	17564	15586	28730	31162	30236	24366	24560	24956	27540	26126	30128	25112	26400	27570	72782	69274	56044	57918	53022	49994	37428	31582	34690	18380	17142	16478	3000	2960	0	14364	14316	14396	36972
317	366.14018	12.25	365.133	0	0	0	0	0	0	0	0	0	0	632	480	564	680	724	0	1034	936	0	1118	858	810	490	1074	920	604	954	0	658	710	492	0	0	446	0	562	0	0	0	0	0	0	0	0	0	0
318	92.00922	12.26	44.9973	0	2052	1880	0	0	0	0	1838	0	1770	2204	0	2528	1716	1562	3038	0	0	2218	2538	2640	2328	2372	1710	3098	1482	2726	0	0	0	0	0	0	1822	1856	2130	2762	1952	2184	1876	1858	1992	2554	2124	2354	0
319	79.92390	12.26	78.9166	0	1234	1256	1556	1076	1378	1876	1450	1440	1136	1120	1102	932	952	884	0	802	0	1088	1190	1124	1236	1676	1194	1104	1184	1448	0	0	1078	906	944	1032	0	886	810	0	700	0	0	0	0	0	0	0	1630
320	382.27167	12.27	381.264	0	0	0	0	0	926	0	0	0	0	1380	0	928	0	0	0	0	0	8912	8912	7072	6400	5944	6008	6342	5870	4998	0	0	0	0	0	0	0	808	0	1048	0	0	0	0	1304	0	1304	0	0
321	380.01934	12.27	379.012	0	0	0	0	0	0	0	0	0	0	0	0	274	0	0	1610	1892	3668	25600	28390	2432	1610	1316	0	0	0	514	0	588	0	400	562	366	520	0	526	0	0	0	0	0	0	0	0	0	0
322	548.27371	12.31	547.266	13092	14488	15566	16798	18382	18768	16524	14544	14150	25954	25712	26998	34576	35486	35996	28396	27058	27432	1492	1028	0	0	0	0	0	0	0	17148	21950	24398	27058	27666	29716	27212	25654	26350	3764	3458	3206	4932	3560	3920	3392	3338	0	0
323	572.42700	12.32	571.42	0	0	0	0	0	0	0	0	0	0	0	0	0	0	0	0	0	0	52324	50704	39282	23402	24978	27754	23910	28074	28608	0	0	0	0	0	0	0	0	0	0	0	0	0	0	0	0	0	0	0
324	558.30045	12.32	557.293	7158	6096	6262	6790	2450	6710	6136	6372	6616	11320	12288	11614	15432	14002	14624	12288	13470	13324	4162	0	0	0	0	0	0	0	0	18446	17368	15692	17982	16268	15942	14226	12780	14358	5180	4934	0	6944	5602	6724	0	0	0	0
325	476.25376	12.32	475.246	0	0	2022	1688	2014	0	2008	1734	2446	9286	8234	8356	13642	12960	12738	11044	10948	11286	0	0	0	0	0	0	0	0	0	10506	13064	13894	15704	14322	14190	13110	13332	15372	0	0	0	0	0	0	0	0	0	0
326	598.44027	12.33	597.433	0	0	0	0	0	0	448	0	0	0	0	0	0	0	0	0	0	0	9724	10972	7502	5512	5366	5058	4638	4908	5226	0	0	0	0	0	0	0	0	0	0	0	0	0	0	0	0	0	0	0
327	81.92219	12.33	80.9149	0	0	1394	1256	1482	1344	1172	1316	1332	1198	990	1102	1016	988	0	0	0	0	1320	1128	1272	1372	1434	1418	1828	1626	1568	976	858	798	0	1112	856	0	794	0	858	0	0	610	0	0	0	732	0	1414
328	524.27417	12.34	523.267	1248	2372	2198	2772	2870	2996	2644	2826	2872	2078	2430	2200	1974	2008	0	1408	1910	1326	0	0	0	1144	750	0	0	0	0	1004	1054	1112	998	0	1154	1046	1008	1172	0	0	1366	0	1360	0	1174	1172	1406	32990
329	534.30349	12.34	533.296	1830	1230	1974	1408	0	0	1262	1658	0	610	932	0	0	926	1092	0	0	0	780	0	0	0	1302	0	0	0	0	1078	854	0	0	0	0	0	0	672	0	1120	1158	0	0	934	0	1136	0	21342
330	480.32878	12.39	479.322	0	0	0	0	0	0	0	0	0	0	0	0	0	0	0	0	0	0	0	0	0	0	0	718	0	0	0	0	0	0	0	0	0	0	0	0	0	0	0	0	0	0	0	0	0	0
331	560.42696	12.39	559.42	0	0	0	0	0	0	0	0	0	0	0	0	0	0	0	0	0	0	13602	12300	10570	7296	5424	7308	7382	6658	7644	0	0	0	0	0	0	0	0	0	0	0	0	0	0	0	0	0	0	0
332	322.24921	12.41	321.242	4638	4560	4618	4564	3814	4204	3762	4104	3822	24476	21104	21930	21782	18990	23084	22240	24484	23914	0	896	1258	1996	1742	1694	0	0	0	5932	5664	5196	6228	6162	6018	5998	6024	6660	7520	6164	5942	6680	7922	7984	10252	7916	8848	784
333	496.35333	12.44	495.346	0	0	0	0	0	0	0	0	0	0	0	0	0	0	0	0	0	0	0	0	0	0	0	0	0	0	0	0	0	0	0	0	0	0	0	0	0	0	0	0	0	0	0	0	0	0
334	688.34012	12.45	687.333	0	0	0	0	906	788	0	7592	6748	4498	4044	0	4210	4272	4804	3906	3012	3092	1842	1504	1420	0	1314	0	0	0	0	1784	1854	1912	0	2466	2748	0	2702	2242	4924	5332	4712	6066	5808	5588	5256	4684	4492	2154
335	428.25420	12.45	427.247	3166	3278	3104	3702	4058	4146	3784	3662	3892	6532	5760	6778	7686	6740	7842	11480	11306	10688	0	0	0	0	0	0	0	0	0	3802	3962	5158	5914	6440	5890	5350	5642	5752	0	0	0	0	0	0	998	0	0	0
336	580.28865	12.45	579.281	0	1776	1830	1760	1928	2160	1938	1880	2022	2324	2372	2294	1922	1896	1824	2138	2640	2626	0	2452	2192	3770	5862	4852	4788	3292	0	1064	0	0	590	0	0	0	0	0	874	1144	1896	2638	3260	3540	2746	3110	2902	0
337	438.28258	12.45	437.275	0	0	2766	0	0	0	0	0	0	0	3714	0	3754	3284	3690	4454	4524	3842	1912	0	0	0	0	1120	0	1342	0	2786	2138	638	2412	2328	2928	1950	2284	2216	0	0	0	0	0	878	1140	0	0	0
338	560.31888	12.46	559.312	6324	5778	5022	4888	6032	4960	4274	4030	4742	7306	7610	8606	7614	8960	9400	7174	8094	7830	1622	1562	1820	1306	0	1550	0	0	1394	8430	7404	8100	7578	7350	7958	6984	6316	6678	0	1420	0	1604	0	1590	1508	1512	1292	2904
339	550.28897	12.46	549.282	9514	12680	11636	14784	15716	16212	13398	12864	14010	21598	19196	16762	20472	20054	20790	18180	16942	16948	0	0	0	0	0	0	0	0	0	8936	10572	11662	12640	12798	14036	12398	12390	13686	1468	1706	0	2160	2178	2116	2134	1736	1746	4894
340	576.45736	12.51	575.45	522	702	0	0	0	0	0	0	0	0	0	0	564	0	0	0	0	0	205216	221008	196016	127980	115866	127182	167526	152058	146498	0	0	0	0	0	0	0	0	0	0	0	0	0	0	0	0	0	0	0
341	526.28979	12.52	525.283	14172	15706	17656	20330	23038	22408	20906	18308	19002	10862	9464	9826	8258	8804	8336	8006	7726	6616	3936	3068	2428	1630	1314	1534	1482	1360	998	3890	5030	4954	7106	6620	6638	6938	6326	7298	4626	4358	3968	4132	4860	4282	4804	3620	3474	22432
342	588.45740	12.53	587.45	0	0	0	0	0	0	0	0	0	0	0	0	0	0	0	0	0	0	28586	27456	24606	15954	16392	16830	17504	18814	19032	0	0	0	0	0	0	0	0	0	0	0	0	0	0	0	0	0	0	0
343	536.31888	12.53	535.312	10116	9050	7346	9680	7852	7680	7136	6144	7174	4826	4300	4794	4278	3918	4078	5132	4534	4358	4484	4338	3076	2850	3968	0	0	3878	3316	5254	3714	4024	4932	4106	4786	3578	0	3630	3294	3474	3150	3100	3600	3546	3152	3390	3352	15450
344	824.48141	12.54	823.474	652	0	0	0	0	0	0	820	798	1022	0	0	0	1416	0	1166	1012	904	1232	912	802	1184	1596	0	0	0	1248	976	0	0	554	0	0	0	0	0	958	0	0	0	0	0	0	0	1014	0
345	97.96503	12.54	96.9578	3334	1794	1712	1556	1508	1270	1594	1806	1476	2260	1584	2434	1766	1768	2120	0	1522	1886	3234	2794	6194	35040	0	0	48536	0	0	7946	3720	2514	2068	1742	2060	1598	1622	1378	1652	1776	2416	2954	3200	4244	3902	3752	3784	0
346	574.44217	12.55	573.435	0	0	0	0	0	176	0	0	0	0	0	0	0	0	0	0	0	0	40770	44834	35862	24346	24548	26240	27334	27278	28556	0	0	0	0	0	0	0	0	0	0	0	0	0	0	0	0	0	0	0
347	486.96868	12.55	485.961	200	2742	2928	2680	402	3338	3186	2706	244	396	320	0	0	0	0	0	80	0	0	0	94	0	0	0	0	0	0	0	42	0	0	0	0	0	0	0	0	0	0	0	0	0	0	0	0	0
348	230.18728	12.55	229.18	1382	1166	1714	1634	1892	1664	1600	1422	1820	0	0	140	662	536	0	428	542	590	1436	1464	1664	1058	1094	1218	1188	1152	1404	498	628	596	1114	938	616	888	838	630	1256	738	730	1152	0	510	912	752	912	786
349	536.22747	12.55	535.22	0	0	0	0	0	0	0	0	0	0	0	0	0	0	0	0	0	0	1738	3584	11528	12180	12588	12454	11312	11214	10856	0	0	0	0	0	0	0	0	0	0	0	0	0	598	0	660	0	558	0
350	388.15486	12.56	387.148	0	0	0	0	0	0	0	0	0	0	0	0	0	0	0	0	0	0	10568	11702	10588	10722	10334	10408	13464	13004	12680	0	0	0	0	0	0	0	0	0	0	0	0	0	0	0	0	0	0	0
351	942.59350	12.58	941.586	0	0	0	462	0	0	0	0	0	0	0	0	0	0	0	0	0	0	22526	21068	17756	12098	10964	10240	12706	12736	12038	0	0	0	0	0	0	0	0	0	0	0	0	0	0	0	0	0	0	0
352	186.12331	12.6	185.116	306	254	410	264	234	0	388	208	220	306	234	212	342	94	0	266	280	180	296	298	0	0	0	0	0	270	216	334	130	190	0	0	90	272	266	132	920	0	744	640	1032	468	816	0	924	512
353	576.30473	12.6	575.297	6304	7446	7592	9384	9812	0	8136	8332	8324	16322	14190	14502	11640	12582	13086	11818	11030	11026	588	0	0	0	0	0	0	0	654	3316	3756	4408	4172	4444	5246	4542	4488	3986	838	0	0	0	0	0	0	0	0	640
354	602.47281	12.6	601.466	0	0	0	0	0	0	0	0	0	0	0	0	0	0	0	0	0	0	128772	125122	118722	77178	77538	79714	90620	83778	82478	0	0	0	0	128	0	0	0	0	0	0	0	0	0	0	0	0	0	0
355	504.28437	12.62	503.277	2862	3152	3966	4122	4172	3884	3786	3546	3904	13710	12564	13886	11758	11714	11368	16584	14884	13502	0	0	0	0	0	0	0	0	412	6636	8478	8370	9932	10564	12008	8594	8522	9028	0	0	0	0	0	0	0	0	0	0
356	868.56185	12.62	867.555	0	0	0	0	0	0	0	0	0	0	0	0	0	0	0	0	0	0	12874	10070	5512	3930	3938	0	3364	3566	2772	0	0	0	0	0	0	0	0	0	0	0	0	0	0	0	0	0	0	0
357	552.30426	12.62	551.297	14690	17734	17914	21622	22254	21198	19670	19804	17854	21970	21358	23974	27158	26856	27472	22692	22168	21436	0	0	0	0	0	0	0	0	0	18630	22742	24980	26984	27898	30578	28002	27450	26376	3578	3006	2952	3464	2938	3172	3206	3224	3038	4844
358	968.60815	12.64	967.601	0	0	0	0	0	0	0	0	0	0	0	0	0	0	0	0	0	0	21438	22914	22370	16274	18602	17344	17542	18340	18502	0	0	0	0	0	0	0	0	0	0	0	0	0	0	0	0	0	0	0
359	690.36675	12.64	689.359	7682	0	0	0	11424	0	8910	0	0	0	0	7146	0	0	0	0	0	0	0	0	0	0	0	0	0	0	0	0	0	0	0	0	0	0	0	0	0	0	0	0	0	0	0	0	0	0
360	562.24315	12.64	561.236	0	0	0	0	0	0	0	0	0	0	0	0	0	0	572	0	0	0	2384	4014	13154	18132	16168	15868	15558	13504	14278	0	0	0	0	0	0	0	0	348	0	0	0	0	0	0	0	0	0	0
361	554.29551	12.65	553.288	0	0	0	8766	0	9896	0	0	0	0	0	0	0	12036	12290	11076	10324	10722	0	0	0	0	0	0	0	0	0	0	0	0	0	1774	12262	1302	0	0	1738	0	0	0	0	0	0	0	0	1936
362	377.23865	12.66	376.231	0	264	0	0	0	186	0	218	318	0	726	0	0	0	608	0	0	396	6364	6400	7310	0	6830	7308	8082	9288	10256	0	334	0	0	0	228	498	0	170	0	0	0	0	0	0	0	0	0	0
363	414.17145	12.66	413.164	490	348	368	0	0	0	180	0	0	0	0	0	0	0	0	0	410	0	12110	12984	12984	12360	13074	14042	16072	16674	19242	738	0	0	0	396	0	0	0	0	0	0	0	874	0	0	0	0	0	0
364	894.57576	12.66	893.568	0	0	0	0	0	0	0	0	0	0	0	0	0	0	0	0	0	0	9438	12552	12294	8710	11704	10312	10730	9974	10818	0	0	0	0	0	0	0	0	0	0	0	0	0	0	0	0	0	0	0
365	552.41598	12.68	551.409	0	0	0	0	0	0	0	0	0	0	0	0	0	0	0	0	0	0	0	0	0	0	0	0	0	0	0	0	0	0	0	0	0	0	0	0	0	0	0	0	0	0	0	0	0	0
366	930.57568	12.68	929.568	0	256	0	0	0	0	0	0	194	0	0	0	0	0	0	0	0	0	0	0	500	746	590	828	0	1030	1064	0	328	420	282	0	0	0	0	0	0	0	0	0	0	348	0	0	0	0
367	690.35535	12.68	689.348	0	0	0	10114	0	0	0	9710	8928	8132	7282	0	7790	7744	7536	6108	5660	5936	13616	10568	9732	8170	7788	6406	6392	6838	0	4976	6090	6814	8272	8188	8990	8322	7522	8070	12432	12322	11466	12418	11426	10252	10412	9192	10616	14692
368	734.30640	12.7	733.299	0	0	0	0	0	552	0	0	0	0	0	0	0	0	0	0	0	0	0	0	0	0	0	0	0	0	0	0	0	0	0	0	708	0	0	0	0	0	0	0	0	0	0	0	0	0
369	488.40680	12.7	487.4	0	0	0	0	0	0	0	0	0	0	0	0	0	0	224	0	0	0	0	0	0	220	0	0	0	0	0	0	0	0	0	0	0	0	0	0	0	0	0	0	0	0	0	0	0	0
370	557.29332	12.72	556.286	0	0	0	1000	2162	3316	5684	6878	7400	11068	9586	11150	10066	11684	10216	7076	6136	6064	8148	0	11726	25370	20842	17074	0	24660	21080	10320	8098	9796	6906	6822	6052	6392	6460	6064	11966	13636	15848	0	14360	0	0	0	0	4606
371	386.26684	12.77	385.26	2078	1726	1500	2466	1924	2298	1950	1630	2068	0	1684	1634	1868	1658	1940	2286	1836	1994	462	472	758	570	678	490	746	0	764	2212	2114	2302	2396	2340	2744	2630	2318	2666	1146	0	0	0	952	0	998	0	0	368
372	572.25827	12.78	571.251	0	0	0	0	0	0	0	0	0	0	0	0	0	0	0	0	0	0	0	0	0	0	0	0	0	0	0	0	0	0	0	0	0	0	0	0	0	0	0	0	0	0	0	0	0	0
373	466.31337	12.78	465.306	3492	2944	2410	3024	2624	2506	0	2080	2036	3832	3834	3696	5578	5064	4758	5078	5904	6000	0	1070	624	0	1706	2028	2102	0	1842	13920	11790	11676	11098	11504	11990	9208	10210	8814	1850	0	1916	1988	1940	2164	1880	2172	1954	748
374	538.33420	12.78	537.327	6840	6626	6394	5438	5176	5180	5624	5384	4496	3668	4146	4608	4974	4522	4766	4712	4660	4514	99378	98424	98992	89678	98432	94156	95102	98758	92730	11746	12198	9760	11250	10256	10374	9398	8726	7854	5166	5452	4442	5168	5384	5206	5180	5806	4786	20244
375	806.56485	12.79	805.558	0	0	0	0	0	0	0	0	296	0	0	0	0	0	0	0	0	0	61916	46412	27970	18190	18734	19758	18860	18612	19912	0	0	0	764	0	0	0	0	0	0	0	0	0	0	0	0	0	0	0
376	780.55136	12.79	779.544	0	0	0	0	0	0	0	0	0	0	0	0	0	0	0	0	0	0	13272	15304	13168	10142	8474	8802	10794	9172	9670	0	0	0	0	488	0	0	0	0	0	0	0	0	0	0	0	0	0	0
377	564.34895	12.79	563.342	14556	11860	11798	11784	11592	10820	10222	9438	9788	10062	8878	8478	7798	8048	8242	11178	10466	10816	3032	2832	2716	2716	2382	2802	2752	2544	2732	11246	11526	10132	9590	9226	4208	8514	7978	7994	0	3124	3822	3768	4036	3442	3580	3294	2970	5228
378	740.32285	12.8	739.316	0	0	0	0	0	0	0	0	0	0	0	0	0	0	0	0	0	0	3796	7006	20306	21620	23426	22934	20370	19158	17468	0	0	0	0	0	0	0	0	0	0	0	0	0	0	0	0	0	0	0
379	472.33869	12.83	471.331	0	0	0	0	0	0	0	0	0	0	0	0	0	0	0	0	0	0	0	0	0	0	0	0	0	0	0	0	0	0	0	0	0	0	0	0	0	0	0	0	0	0	0	0	0	0
380	484.29952	12.85	483.292	2392	0	2018	2578	2502	0	2170	2294	2752	10618	10974	10196	5478	5034	6494	7826	7130	6684	0	0	0	0	0	0	0	0	0	8752	0	7274	0	7850	0	8424	8376	0	0	0	0	0	0	0	0	0	0	0
381	266.15462	12.85	265.147	13180	7744	9612	10566	8996	10636	9022	7922	6566	9868	5274	9708	8598	10078	11272	10784	11384	11148	5882	0	7978	20318	13078	8434	7024	8028	8610	3280	2860	2738	2204	2750	2588	2902	2630	3106	6218	6786	9786	10074	8310	8204	0	5364	8848	1322
382	426.28249	12.86	425.275	918	1208	1100	1236	0	1554	590	1142	890	0	686	0	796	0	678	354	938	660	0	0	0	0	0	0	0	0	0	1156	556	0	0	1332	0	0	544	1084	0	0	0	0	0	748	0	0	0	0
383	556.44924	12.86	555.442	0	0	0	0	0	0	0	0	0	0	0	0	1484	0	0	0	0	0	0	0	0	0	0	0	0	0	0	0	0	0	1524	0	880	0	0	0	0	0	0	0	0	0	0	0	0	0
384	280.17025	12.86	279.163	3838	3086	3300	3590	3256	3654	4278	3692	3596	4488	4010	3804	3810	4784	5612	6978	8742	10404	13036	10884	7796	16906	11194	7682	5038	4024	5538	2410	2018	2076	1670	1648	1576	0	1776	1614	2782	3198	4700	0	7762	6900	5812	3600	3550	0
385	224.10564	12.86	223.098	0	422	0	0	272	404	608	778	1132	0	936	1072	668	226	272	194	0	0	0	0	0	2380	1862	1752	1554	1244	1360	0	1284	608	322	650	460	662	662	0	0	1120	736	926	2858	3160	2866	2590	2662	0
386	86.03527	12.86	85.028	3894	3558	3254	2112	3286	3454	3454	2452	3472	2046	1878	1806	1656	1406	1322	1642	1672	1292	0	172	174	292	288	382	338	352	330	0	376	572	346	0	0	0	174	106	366	294	296	266	234	162	314	144	308	0
387	482.29994	12.86	481.293	4668	4520	4194	5540	5944	5832	5288	5542	4684	15584	14370	15656	10134	9466	9182	14596	16108	13836	0	0	0	0	0	0	0	0	0	0	0	0	0	0	0	0	0	0	0	0	0	0	0	0	0	0	0	0
388	266.04198	12.86	265.035	394	2226	1972	2302	2444	2376	2034	1302	1502	952	1154	762	0	0	0	792	0	0	0	0	0	0	0	0	0	0	0	364	900	0	618	596	654	642	450	798	668	0	740	636	0	1022	1002	0	862	0
389	228.20800	12.87	227.201	6458	5440	4820	5308	5300	4886	4890	4872	4066	8916	7034	8918	5674	6602	7918	15224	16422	14316	3696	2836	3004	2270	1840	2472	3040	2978	3076	5002	3310	3296	4036	3958	3182	3440	3184	3494	9990	9220	12856	10472	10448	11598	12714	12510	12060	7086
390	312.17533	12.87	311.168	0	0	27226	29548	26202	23938	23580	0	0	0	0	0	30574	29746	29240	30528	30784	31086	24016	23514	27318	54300	54724	0	42074	32918	32162	12476	11298	0	7874	5584	7212	6336	7776	9486	0	0	0	29036	30574	0	24824	0	27234	3168
391	298.15954	12.88	297.152	13984	9884	9686	9356	10088	11060	9702	9176	9176	13246	0	0	12414	13512	13052	13932	11316	11650	7290	6728	11838	30046	24516	19390	0	0	15184	6232	4760	4542	2934	3022	3560	4252	4068	4768	11380	12798	13614	15134	13948	13190	11770	11586	11174	2476
392	326.19119	12.88	325.184	20918	15756	14392	14628	16064	16702	20290	0	23612	0	0	0	27188	26866	27344	28844	25172	25942	22108	0	25710	51670	48042	0	44956	38924	33194	11712	10542	9636	6458	6778	6296	5130	6058	6684	16054	18146	0	23370	24446	0	22086	20082	19968	2482
393	240.17157	12.89	239.164	2174	436	296	0	0	0	282	238	120	0	226	0	216	162	0	0	0	0	0	0	160	0	0	162	0	0	0	0	0	300	0	0	0	208	0	0	0	0	0	416	0	0	238	210	0	140
394	137.89675	12.89	136.889	14574	17150	17070	18628	16680	16536	0	17530	0	18776	18924	18310	17188	19434	17372	20222	17606	7518	6640	5882	5600	5808	5582	4260	4844	4032	3162	1436	2056	2070	1354	4200	2430	1524	2196	3306	16486	16160	15132	15192	15486	14852	12636	12864	11972	0
395	340.20631	12.89	339.199	10396	0	0	8370	7590	7976	7224	8092	0	19924	0	0	29354	28450	0	0	0	0	14220	15202	17380	33462	31004	34918	32536	31998	25894	9660	7720	7378	5564	5678	4818	6312	4564	4692	10228	0	0	8088	0	18734	14570	0	14156	1474
396	376.31804	12.9	375.311	0	0	0	0	0	0	0	0	0	0	0	0	0	0	0	0	0	0	1828	0	0	1960	2036	1942	2062	2340	2194	0	0	0	0	0	0	0	0	0	0	0	0	0	0	0	0	0	0	18944
397	366.28989	12.9	365.283	0	0	0	0	0	0	0	0	0	0	0	0	0	0	0	0	0	0	1800	0	0	2340	2398	2056	0	2328	1740	0	0	0	0	0	0	0	0	0	0	0	0	0	0	0	0	0	0	32536
398	214.01038	12.91	213.003	534	10558	9744	10798	13332	12436	11702	6876	6086	2670	3968	3664	2818	2670	3052	3178	2894	3078	2396	2544	2164	692	912	0	570	622	390	368	1168	0	1086	1336	1258	0	0	1262	0	1682	2110	1874	2132	2348	2034	2002	2034	0
399	81.92188	12.93	80.9146	1280	1366	1242	1456	1488	1788	1058	1200	1112	1792	1908	1938	1156	858	1046	1282	850	1032	1196	1390	1292	1546	1732	1374	1270	1290	1750	0	0	0	946	894	0	960	0	836	1252	758	1094	792	902	1000	834	1040	702	1762
400	534.43550	12.94	533.428	4572	5204	4510	4384	5206	0	4688	5022	5662	6306	7142	6374	6480	5870	5476	8474	9792	10232	3472	2592	2368	1890	0	1468	1566	1982	1560	10092	9702	9878	10298	10014	9850	10360	9766	10208	8096	8074	6994	8156	7012	6082	6554	6808	7930	6842
401	622.44284	12.95	621.436	0	0	0	0	3168	0	3286	612	2862	1172	1758	1250	1590	1762	1306	0	0	1738	972	714	566	590	0	422	0	1108	0	0	0	336	0	0	0	0	0	186	0	0	756	0	866	0	0	784	1062	0
402	576.38699	12.95	575.38	0	0	0	0	0	0	0	0	0	0	0	0	0	0	0	0	0	0	0	0	0	0	0	486	394	534	558	838	770	0	0	0	740	0	0	0	0	0	0	0	0	0	0	0	0	0
403	532.43559	12.96	531.428	13006	12980	12624	14674	12572	14708	13500	12864	13512	19608	17530	16454	15518	15648	16740	21866	23544	25136	8218	8148	6708	4972	4122	4126	4008	3678	4112	26104	26618	25482	26038	26228	24786	28746	26648	25388	23576	20986	21228	19062	17116	14960	18494	18364	18472	18716
404	375.82458	12.96	374.817	0	122	0	0	0	914	0	0	696	1540	0	282	152	0	158	0	0	0	0	0	0	0	0	0	0	0	0	0	98	0	0	0	0	0	0	0	104	0	0	0	0	0	0	72	0	0
405	366.25325	12.96	365.246	14668	15572	16768	14840	14050	16892	11046	10268	10708	27290	23690	22680	18814	19368	21072	27678	29116	32500	12088	11432	11542	10580	9576	9526	7282	7656	6792	27208	36686	38068	40534	40764	42874	46856	41632	47798	41964	35498	35784	23810	22198	20868	34658	32094	33092	13774
406	79.92399	12.96	78.9167	1432	1204	1710	1282	1660	1536	2250	1328	1312	1772	1656	1416	1342	958	876	1190	1104	918	968	1104	1108	1462	1258	1818	1294	1432	1382	936	820	932	1032	958	0	824	886	0	1010	1118	1040	800	652	1032	888	904	1184	1604
407	262.01357	12.97	261.006	2690	0	2724	2974	3500	3474	3820	3568	3136	5480	3416	7068	4372	3850	4280	4456	4210	3238	2080	1088	1434	1122	930	1096	880	588	816	0	0	1140	0	0	0	0	1048	0	840	396	554	534	530	758	374	390	0	152
408	462.29834	12.97	461.291	4962	5152	4762	5420	6370	3004	5338	5904	6016	9708	8662	9286	11336	10574	12906	13878	13142	13746	0	0	0	0	0	0	0	0	0	6482	6056	6350	7176	7760	7596	6048	5906	6528	0	0	1030	0	0	926	970	0	0	0
409	575.71451	13	574.707	0	0	0	0	0	0	0	0	0	0	0	0	0	0	0	0	0	0	0	0	0	0	0	0	0	0	0	0	0	0	0	0	0	0	0	0	0	0	0	0	0	0	0	0	0	84
410	127.90977	13	126.902	3330	2112	1970	1730	1636	1802	1702	1226	1252	1358	1450	2048	1256	1196	1398	1160	1234	1280	1788	1716	1986	2220	2182	2274	2052	1876	2180	1368	1134	1158	1240	1300	1268	1336	0	0	0	0	0	1038	0	0	1166	1080	1058	1182
411	392.26833	13.02	391.261	0	538	1522	1688	1626	1904	1308	1464	1414	3940	3574	3582	2456	2124	2432	2898	3002	3476	526	948	618	0	0	0	0	0	0	1448	1344	1306	2098	1770	1446	1466	1800	2046	1926	1496	1522	1262	754	1080	1922	1844	0	3244
412	486.31949	13.04	485.312	3898	2896	2740	1006	2396	2828	1960	0	2382	7162	6580	7264	6280	6250	6878	11828	9084	8102	0	0	0	0	0	0	0	0	0	11136	6132	5144	4644	4080	4076	3656	3828	2754	0	0	0	0	0	0	0	896	0	0
413	318.06258	13.04	317.055	0	0	0	9604	6542	5250	5022	4438	4424	5650	5944	6190	6178	7006	7646	6858	7102	7278	4486	4720	5198	5488	5174	5168	4122	3776	3586	3056	2662	3204	2276	1910	1886	1910	1756	1812	2256	2400	2146	2064	2192	2266	2264	1916	2098	1158
414	372.13108	13.1	371.124	0	0	0	0	380	0	0	0	0	0	0	0	0	0	0	0	0	0	0	0	0	0	0	0	0	0	0	0	0	0	0	0	0	0	0	0	0	0	0	0	0	0	0	0	0	226
415	529.26256	13.14	528.255	5996	4166	3984	4136	5934	6492	5996	3930	3146	3692	2210	1536	2028	2298	2460	2214	1712	1480	0	1206	2356	4534	3682	2362	0	0	0	0	0	0	0	0	0	420	0	0	1092	0	1570	1922	1520	1616	1616	986	672	0
416	570.36628	13.16	569.359	0	0	0	0	0	0	0	0	0	0	0	0	0	0	0	0	0	0	0	494	498	0	0	0	0	678	0	0	0	0	0	0	0	0	0	0	0	0	0	0	0	0	0	0	0	5522
417	798.46058	13.17	797.453	0	0	0	0	0	0	0	390	0	0	0	0	0	0	0	0	0	0	0	0	0	0	0	0	604	0	0	0	0	0	0	0	0	0	0	0	0	0	0	0	0	0	0	0	0	0
418	798.47636	13.21	797.469	0	0	0	0	0	0	0	0	0	0	0	0	0	0	0	0	0	0	0	0	0	0	0	0	0	372	0	0	0	0	0	0	0	194	0	0	0	0	0	0	0	0	0	0	0	0
419	509.34809	13.22	508.341	0	0	0	0	0	0	0	0	0	260	440	380	0	680	0	0	0	0	3186	3126	1898	1352	1390	1530	1250	1046	0	0	0	240	0	0	0	280	344	0	0	0	0	0	0	0	0	0	0	4438
420	596.49923	13.25	595.492	0	0	0	296	0	438	432	0	468	0	0	0	0	0	0	0	0	0	44534	25852	14532	7958	7878	8004	12066	13894	12818	0	0	0	0	216	0	0	0	0	1042	810	0	1012	544	888	1112	1002	936	0
421	484.27858	13.27	483.271	926	762	768	0	752	1012	866	936	0	0	0	0	1118	0	976	0	796	0	1610	1500	1580	1834	1764	0	2254	2104	0	4678	6882	6262	4766	4460	3914	3850	4428	5016	7646	6918	7894	4870	2456	0	1386	1424	0	0
422	500.22686	13.27	499.22	0	0	0	0	0	0	0	0	0	0	0	0	0	0	0	0	0	0	0	0	0	0	0	0	0	0	0	0	0	0	0	0	0	0	0	0	498	0	0	0	0	0	0	592	0	0
423	440.31241	13.28	439.305	5514	6116	5488	7982	7016	6838	6440	5726	6326	3048	3236	3590	3596	3482	4070	3840	3902	3842	0	0	0	0	448	0	0	0	0	2614	2400	2138	2880	2432	3114	2684	2362	2488	0	676	956	540	0	496	792	0	708	0
424	384.25613	13.3	383.249	0	0	594	0	0	0	0	0	0	0	0	0	396	0	520	0	0	0	510	0	0	598	0	0	580	0	0	0	0	0	0	0	0	0	0	0	0	0	0	0	0	0	0	0	0	14294
425	250.15618	13.31	249.149	720	156	494	424	828	568	524	0	360	712	1012	894	744	348	700	730	894	872	396	594	658	800	624	318	546	634	478	636	458	250	308	0	564	330	0	374	350	530	592	458	420	778	682	496	426	6890
426	97.96507	13.32	96.9578	4304	2132	2110	1812	1860	1922	1870	1818	1986	1938	1640	2078	2276	2020	1880	1696	1468	1930	2106	2846	4304	25398	28870	28520	31910	0	39354	8960	3912	2914	2200	2456	1970	1866	1792	1972	1584	1702	2706	2972	3346	3482	3906	3708	3898	798
427	256.23947	13.36	255.232	7804	7250	6116	4794	5060	5026	5834	6204	4208	4562	4542	4362	3504	3766	3332	12128	13124	12928	60194	58302	52608	35810	23406	24972	52638	39604	38402	26680	22270	16188	23894	18348	17838	16934	16246	14974	21772	18454	21584	16348	17400	15954	19458	22414	20378	49382
428	117.93361	13.37	116.926	8584	9146	8912	8976	7968	7348	7922	7112	7942	9112	9472	8494	8606	8482	8890	9504	8536	8374	8400	8248	7684	7818	7568	8172	7778	8126	7912	9972	9202	9900	8052	7840	7512	7044	7554	6156	9000	8346	8246	7954	8546	7950	7360	7298	7142	848
429	385.16297	13.37	384.156	374	286	458	0	0	0	410	458	476	0	0	0	1052	1532	1288	1162	0	0	0	0	0	0	0	0	0	0	320	0	350	456	452	424	0	0	314	0	0	0	0	0	0	0	0	0	0	0
430	438.32083	13.37	437.314	2594	0	0	0	0	0	0	0	0	0	0	0	0	0	0	0	0	0	0	0	0	0	0	0	0	0	0	10018	6730	6142	5396	4868	0	3740	4216	3332	426	0	0	0	0	0	0	0	0	0
431	538.49507	13.38	537.488	580	0	418	0	0	462	0	380	268	676	532	608	418	378	0	1850	2046	1576	7524	5988	7950	4694	3544	4066	8516	6556	6942	1034	776	0	890	632	1000	760	0	214	2208	0	2042	2218	2730	1926	3112	2926	2658	3226
432	266.04190	13.38	265.035	618	1486	1492	1282	1566	0	0	1058	1170	0	0	0	0	0	0	0	0	0	692	0	0	0	0	0	0	0	0	948	774	930	728	766	802	344	836	0	0	0	0	642	756	0	0	0	0	0
433	400.16150	13.39	399.154	0	0	0	0	0	0	0	0	0	0	0	0	0	0	0	0	0	0	0	0	0	0	0	0	0	0	350	604	0	0	0	0	0	0	0	0	762	622	638	666	724	0	0	0	0	812
434	86.03514	13.39	85.0279	3630	2584	2680	3108	2666	2342	2446	2396	2144	1656	1262	1526	1186	1074	1140	1682	0	906	630	548	566	168	418	608	672	338	338	338	588	480	0	448	382	408	456	496	0	234	216	250	278	394	270	224	280	0
435	92.00878	13.4	44.9971	0	2352	0	0	0	2120	0	0	1506	2748	2914	0	0	0	2398	0	2302	2282	3346	3254	2152	2238	2720	0	4068	0	2792	0	2822	2504	3094	3292	2904	2890	2434	2746	2942	2758	0	3266	3020	3566	0	3414	3750	0
436	431.85215	13.4	430.845	0	0	0	0	0	0	0	0	0	0	0	0	0	0	0	84	102	0	0	0	0	0	0	0	0	0	0	0	0	0	0	0	0	0	0	114	122	0	0	0	210	238	200	0	172	0
437	104.00871	13.4	103.001	490	460	702	778	1004	1004	0	0	892	586	0	384	580	690	0	496	740	566	502	452	538	208	172	438	368	402	270	702	728	722	762	972	910	892	808	822	320	488	152	256	320	304	274	272	236	0
438	422.23306	13.41	421.226	746	696	568	500	432	694	0	418	614	1050	1026	936	810	714	0	796	916	580	740	910	870	1114	804	952	1192	722	498	0	0	0	466	214	284	422	376	0	1112	928	1114	862	0	1128	752	898	0	320
439	138.02946	13.41	137.022	3378	2948	3214	4108	4620	4490	4202	4702	4734	1402	1312	1312	0	0	1062	1288	0	1270	2236	3680	9192	12904	13312	13600	16308	16394	14444	2608	2758	2270	2720	2580	2900	2634	2714	2720	1112	0	1030	962	0	1286	968	0	986	264
440	326.19142	13.41	325.184	0	0	27220	0	0	0	0	0	0	0	0	0	0	0	0	0	0	0	0	0	0	0	0	0	0	0	0	0	0	0	0	0	0	0	14190	16470	31258	33904	41476	44416	0	48880	41516	40594	0	2264
441	208.07581	13.41	207.069	730	0	0	786	3110	2982	3658	4738	5276	3582	5016	2132	0	0	632	360	518	1024	0	402	0	0	1254	1194	1812	1604	1518	984	272	0	2762	4066	4996	1306	840	438	2144	2422	1184	2038	2046	1964	1524	1524	2034	200
442	370.23580	13.42	369.229	588	0	700	636	0	586	628	0	0	0	646	0	710	732	696	680	632	0	0	626	0	0	0	0	0	0	0	0	340	0	0	0	0	400	0	0	0	0	0	0	1194	0	1310	1236	0	344
443	328.26110	13.42	327.254	1392	1170	0	0	0	972	0	0	0	0	0	0	0	0	0	3410	3372	3230	5014	4712	5718	4016	4468	3824	5046	6092	6098	1708	1084	0	1320	1610	0	1110	730	0	2614	2390	2614	0	2394	0	1672	0	2452	0
444	138.01291	13.42	44.997	0	2310	2196	0	0	2052	0	1794	1912	3092	2956	0	2490	2552	2958	3094	4332	4852	3428	5472	5986	4116	2716	2630	6614	0	2878	2962	2972	2918	3632	4060	2626	2260	2926	3440	2166	4312	0	3894	3854	3220	3626	3716	3468	7726
445	564.50995	13.43	563.503	0	994	0	1520	0	0	1082	798	782	2972	2566	2714	1846	1966	2354	4588	4972	3996	9900	8562	10232	9540	8398	8620	10824	11206	12886	848	536	0	0	480	564	0	0	0	2446	2816	3562	4756	3756	3818	3934	3306	3112	3236
446	836.52165	13.44	835.514	0	0	0	0	0	646	0	546	0	732	678	0	500	0	0	1036	706	1136	1074	0	1004	0	0	1346	0	2110	1856	824	260	0	0	712	682	334	668	614	1090	0	926	1150	1428	0	0	964	1378	0
447	304.16752	13.44	303.16	0	0	0	0	0	0	0	0	0	0	0	0	0	0	0	0	0	0	692	468	402	0	478	0	0	0	0	0	528	256	186	198	0	330	0	170	0	0	0	0	0	0	0	0	0	0
448	93.93318	13.45	92.9259	2068	1928	1964	2668	2954	2768	3076	3328	3552	2384	2218	2176	2544	2242	2302	3046	2838	2914	592	410	406	0	56	0	0	114	0	1644	2388	2732	2710	3240	3270	3782	3544	3376	0	972	0	706	0	498	0	822	620	11432
449	480.32839	13.46	479.321	2226	2054	2188	2778	2462	2982	2570	2772	2694	0	0	0	0	0	0	0	0	1332	0	0	0	0	0	0	0	0	0	3428	1766	1420	1818	1822	2326	1828	2300	1782	0	0	0	0	0	0	0	836	0	0
450	396.27107	13.48	395.264	0	0	0	0	0	0	0	0	0	0	0	0	0	0	0	0	0	0	0	0	0	0	1042	0	0	906	0	0	0	0	0	0	0	0	0	0	0	0	0	0	0	0	0	0	0	0
451	262.01374	13.49	261.006	2044	0	2410	2582	2764	3654	3630	3376	2474	3270	2708	4198	2616	2790	2710	2638	3140	2298	2532	1708	1724	1174	1182	0	1254	744	960	0	0	1336	0	1296	1144	0	0	0	296	542	318	0	494	512	406	528	534	364
452	103.96189	13.57	102.955	1262	0	1156	1126	882	1246	1374	1106	992	778	904	902	894	956	562	2188	1986	1678	0	0	0	0	0	0	0	0	0	2376	2782	2142	2252	2254	2202	1880	2030	1730	648	0	0	0	0	0	600	0	396	16306
453	256.16697	13.6	255.16	266	0	214	0	0	0	0	0	0	0	0	226	0	0	0	0	0	194	0	0	0	0	0	0	0	0	0	0	0	0	0	0	94	0	104	0	0	232	0	0	224	0	0	326	0	20680
454	541.33898	13.68	540.332	0	0	0	0	0	0	0	0	284	0	0	220	290	512	0	0	0	226	0	0	210	0	396	0	354	0	0	224	174	0	0	0	0	0	0	236	0	0	584	0	0	360	318	0	674	0
455	308.27054	13.71	307.263	2514	2080	2078	2232	1920	2304	2026	1720	1714	10154	10862	10438	5582	5232	5302	3620	3934	4084	0	0	0	0	0	0	0	0	0	1472	1018	1244	1080	1256	0	1288	1120	922	430	424	350	416	558	492	0	524	0	572
456	512.84675	13.77	511.839	0	0	0	0	0	0	0	0	0	0	0	0	0	0	0	0	0	0	0	0	90	0	0	0	0	0	0	0	0	0	0	0	0	0	0	0	0	0	0	0	0	0	0	0	0	11126
457	127.91000	13.87	126.903	2594	1990	1502	1752	1560	1418	1448	1314	1306	0	1030	0	1066	0	0	0	1104	0	1650	1336	1526	1670	1502	1994	1886	1626	1858	0	1184	0	0	1104	0	1030	0	0	1202	0	0	0	894	1062	0	0	0	846
458	535.37050	13.87	534.363	0	266	0	0	0	0	0	0	148	5722	5782	5344	12754	12762	12990	13216	11628	12150	0	0	0	0	0	0	0	0	552	18076	15560	13382	18918	17282	19598	12456	12724	13090	0	0	0	0	364	0	0	0	0	0
459	594.27146	13.89	593.264	1560	0	0	0	1158	0	2210	1926	2162	2262	2558	2366	1390	0	1462	0	1936	2024	2156	2228	2626	4376	4060	3674	4410	4254	3992	1702	838	512	722	938	0	1190	0	0	1700	1990	1300	1340	0	1576	1476	1472	1452	438
460	596.28501	13.95	595.278	0	4630	4870	4048	0	3642	2908	3114	3504	4172	3902	4812	2970	2158	2102	2020	2206	2200	2794	2924	3698	3508	3218	3056	2774	2884	2832	0	1574	1368	0	1198	0	0	0	1512	2426	2436	2296	0	0	2114	2046	2066	2090	360
461	232.00302	13.96	230.996	8780	8934	0	10500	10162	0	0	12268	0	8426	0	12492	14384	13622	0	0	0	23022	6878	0	9220	0	0	13062	0	0	0	5698	6392	5932	6688	7846	6466	6786	6446	7346	2632	2752	2630	2436	2566	2794	2206	2306	2384	1010
462	692.44247	14.04	691.435	4244	0	0	2492	0	0	2448	0	0	0	3838	3252	0	0	0	2880	0	0	0	0	0	0	6776	0	0	0	0	10984	0	5794	0	3488	0	3648	0	0	2952	2982	0	0	3566	4244	0	0	3000	0
463	385.16022	14.05	384.153	0	250	488	510	434	460	488	396	410	628	1198	1094	1386	1218	1378	0	0	1070	0	0	0	0	0	0	0	0	0	0	288	212	0	560	530	454	406	388	198	0	0	0	208	0	0	0	0	0
464	324.26658	14.06	323.259	672	612	0	636	860	332	424	516	600	828	604	482	634	0	0	380	506	0	2460	1932	0	1382	1658	632	2172	0	1864	0	0	0	312	368	0	508	0	450	1544	1456	0	1538	1422	1392	1852	1184	1518	10278
465	310.18003	14.14	309.173	3596	3646	3224	3016	3626	4026	3118	2912	2528	3142	3552	2506	2572	2586	3512	2738	2750	3146	2848	2332	3468	4886	4592	3618	2618	3478	4026	2294	1768	1736	1018	1486	0	1504	1976	0	1932	2222	2398	2472	2736	2846	2694	2430	1810	0
466	220.05286	14.27	219.046	0	0	0	0	0	0	0	0	0	0	16836	14340	17016	0	0	0	0	0	0	0	0	0	0	0	0	0	0	28606	0	36976	0	0	0	0	0	0	2410	2068	1910	1376	1430	1502	1612	1610	1872	0
467	218.99153	14.39	217.984	6430	0	7734	0	9718	10432	10402	10048	10708	2182	1966	1700	1492	1702	1594	1902	1956	1914	2918	5090	16534	19758	19912	0	0	0	0	5932	4430	4614	5412	5710	6164	5318	5642	6742	1256	0	1332	1332	0	1362	0	1194	1446	0
468	266.04257	14.53	265.035	0	1530	1432	0	1450	1224	1352	0	880	0	0	0	0	0	0	0	0	0	0	0	0	0	0	0	0	0	0	0	0	468	718	734	886	642	604	0	0	0	442	0	0	0	0	568	0	0
469	866.49471	14.57	865.487	0	0	0	0	0	0	0	0	1078	0	1272	0	1536	0	1794	0	0	0	2300	2800	2816	3788	4058	3550	4056	4606	4730	0	3220	3338	2874	3180	0	3596	3454	4252	0	6136	7200	6480	6144	5936	0	5228	5304	1396
470	422.23338	14.65	421.226	0	462	478	0	0	606	612	0	554	716	500	0	700	738	0	0	584	700	976	914	560	916	0	774	738	0	860	0	358	0	0	0	0	284	0	296	758	872	902	634	884	854	832	848	970	0
471	385.15930	14.74	384.152	266	520	438	412	536	598	368	306	422	0	0	0	0	1312	1336	1292	0	1024	0	0	0	0	0	0	0	0	0	0	282	484	0	536	456	584	364	370	0	0	0	0	130	0	0	0	0	212
472	836.53004	14.76	835.523	0	0	0	0	0	0	0	0	766	0	1010	0	1018	0	0	0	1042	1140	0	0	0	0	1808	1878	0	0	0	0	0	0	0	1126	0	0	1204	1154	1586	0	0	0	2044	0	0	0	2356	0
473	564.07756	14.79	563.07	4102	2954	2918	4276	4882	5458	4952	4124	3990	3338	1776	1200	616	0	770	0	0	474	360	486	0	0	388	390	286	252	500	282	0	0	0	0	0	292	0	0	182	88	0	0	0	174	0	0	198	0
474	380.02081	14.79	379.014	704	274	0	0	0	0	0	0	0	0	0	0	0	0	1572	4742	5114	11194	0	0	3320	1746	1646	1382	0	0	0	0	890	0	0	0	0	848	0	694	0	594	568	846	0	0	0	0	0	306
475	556.54835	14.79	555.541	0	0	0	0	0	0	858	0	1086	0	0	0	1304	1326	1356	0	0	0	1816	2020	2988	3596	3114	4286	0	3566	2822	0	0	1250	0	0	0	0	1310	0	0	0	0	1986	1662	2332	2284	2696	2862	0
476	423.23624	14.81	422.229	242	0	0	150	256	208	0	0	0	0	220	0	282	0	0	140	0	296	386	446	404	0	0	350	0	0	0	212	0	0	0	0	0	242	0	0	0	0	0	0	0	370	350	0	432	0
477	583.31031	14.89	582.303	242	0	0	0	552	0	3140	8062	0	23864	0	0	17630	19792	0	0	0	0	13988	13820	0	25628	24746	0	23906	17754	0	9974	6428	5478	5108	5184	4486	4848	4798	5146	7472	9806	0	10670	0	10928	0	0	17324	4656
478	377.82180	14.96	376.815	0	258	1396	1474	1618	1708	0	0	0	1316	198	192	198	278	102	246	160	0	0	0	148	0	0	0	140	134	0	78	102	150	0	112	0	200	0	76	0	162	0	110	0	0	166	144	108	0
479	664.34691	14.97	663.34	0	0	0	0	0	0	0	0	342	0	0	0	0	0	452	720	458	490	0	0	0	552	0	0	0	830	0	16230	0	0	0	8034	0	0	0	0	1042	0	0	0	0	0	0	0	0	0
480	224.10688	14.97	223.1	466	0	0	516	372	0	508	0	0	0	998	912	442	252	644	0	0	1088	0	914	1280	2330	1596	2234	3092	3392	3168	0	1888	388	526	876	0	698	0	0	1100	0	448	3922	4974	5242	5644	5780	5442	1278
481	554.30473	14.99	553.297	4226	7800	7836	10250	11312	10640	9638	10050	9534	10518	11302	12006	14796	0	0	0	17626	0	0	0	0	0	0	0	0	0	0	0	6378	2732	0	0	8842	2704	0	0	0	0	0	0	0	0	0	0	0	0
482	111.98061	15.01	110.973	1286	0	0	0	1214	1398	0	1226	0	1246	1186	1234	1048	0	1222	1202	1286	1252	3360	8920	22544	0	21982	0	0	13258	12234	2074	1878	1588	1718	2046	1876	2066	2168	1982	1920	1814	1702	1632	1630	1704	1570	1696	2210	438
483	517.32949	15.06	516.322	4106	4970	4900	4484	4178	3420	3572	3688	3568	12824	12520	12630	5652	4996	5678	2460	2134	2078	608	0	0	0	308	238	0	0	0	0	194	250	382	0	448	0	524	390	718	784	632	1494	1416	1080	848	0	876	0
484	408.22997	15.06	407.223	1724	1346	0	0	0	1164	0	782	920	0	1052	1008	816	896	774	654	474	790	970	0	0	0	0	0	0	0	0	0	554	0	500	516	430	0	0	384	678	644	880	0	1008	826	0	0	0	0
485	738.45315	15.07	737.446	0	0	0	0	0	0	0	0	0	0	0	0	0	0	0	0	0	0	0	0	0	0	0	0	0	0	0	0	0	0	0	0	0	0	0	0	0	0	0	0	0	0	0	0	0	0
486	556.96155	15.12	555.954	0	0	0	0	0	0	0	482	656	400	544	0	370	852	0	418	0	0	1090	0	1464	2574	0	2184	2568	2618	1920	568	832	554	616	422	476	396	0	544	686	0	1034	898	1052	1160	1220	1186	1862	0
487	396.26873	15.12	395.261	682	758	610	818	552	646	0	434	764	788	956	0	0	1074	0	952	986	952	620	0	530	0	0	0	0	0	1148	630	618	500	486	704	680	0	674	0	0	0	0	0	0	0	0	0	0	0
488	438.27403	15.24	437.267	6442	5082	5542	5542	4936	4558	4808	4686	4870	5338	5626	5226	4858	4824	4762	4488	4526	4920	5292	4518	4796	4726	3422	2676	2168	2336	1954	0	1104	1120	770	740	690	552	680	654	610	742	764	962	688	740	948	806	0	0
489	504.29420	15.26	503.287	546	578	710	0	0	610	702	524	0	412	442	572	692	770	764	672	594	690	410	0	0	536	0	0	860	0	2756	7536	8130	7806	0	4798	4540	3172	2636	2654	4516	4938	6574	8706	10220	9536	8338	5970	5072	730
490	422.23308	15.33	421.226	0	796	576	476	648	530	694	626	496	744	718	696	850	0	576	510	568	0	786	0	868	1132	1038	1018	720	1002	0	554	386	0	0	0	0	0	0	348	0	702	678	864	902	748	882	922	0	0
491	868.50621	15.36	867.499	0	0	0	0	0	0	0	662	998	1544	0	0	0	1664	2024	0	1666	1772	2256	2556	0	0	0	4384	4754	4414	4498	0	1928	0	0	0	1444	1310	1570	1616	0	0	0	2572	2388	2624	2734	2976	3478	1366
492	268.13392	15.37	267.127	0	0	0	0	0	0	0	0	0	0	0	0	0	0	0	0	0	0	0	0	0	0	0	0	0	0	0	0	0	0	0	0	0	0	0	0	0	0	0	0	0	0	13984	13984	14212	540
493	344.29279	15.37	343.286	0	0	0	0	0	0	0	0	0	0	0	0	0	0	0	0	472	310	1726	2110	0	0	720	0	312	446	0	286	0	204	162	258	266	158	0	392	912	1132	1108	1426	1220	1280	1464	1530	1296	4516
494	556.55117	15.39	555.544	0	0	226	0	0	0	0	1162	0	0	1252	1144	1420	0	0	1046	0	0	2302	0	2710	3920	2974	3856	4128	0	3292	0	1238	0	0	1246	0	1182	1348	1276	0	0	1966	0	2202	2862	2766	2762	3216	0
495	836.54750	15.4	835.54	802	0	0	694	0	0	830	0	0	0	0	0	0	0	0	0	0	0	0	0	0	0	0	0	0	0	0	0	0	0	0	0	0	0	0	0	0	0	0	0	0	0	0	0	0	0
496	692.44497	15.41	691.438	0	0	0	2940	2402	0	2746	2658	0	0	0	4260	0	0	0	0	0	0	0	0	0	8690	0	0	0	0	0	0	0	0	0	0	0	3264	0	3204	0	0	0	0	0	0	0	0	0	532
497	400.16131	15.51	399.154	0	0	0	0	0	0	0	0	382	0	0	0	0	502	0	0	0	0	0	0	0	0	0	0	0	0	478	0	0	0	0	0	0	350	0	0	0	506	0	0	0	0	0	0	0	288
498	792.50178	15.55	791.495	0	0	0	0	0	0	0	0	0	0	0	0	0	0	0	0	0	0	0	0	0	0	0	0	0	0	0	0	0	0	0	0	0	0	0	0	0	0	0	0	0	0	0	0	0	0
499	1669.4044	15.57	555.461	0	0	0	0	0	0	0	1652	1796	0	1584	1886	1536	0	0	1604	0	0	2770	2762	0	0	3164	3268	4136	0	2788	0	1824	0	0	1772	0	0	0	2002	2112	0	2684	2546	0	2588	3500	0	3152	0
500	212.03423	15.63	211.027	0	0	0	1400	1388	1340	1534	1458	1360	1640	1644	1444	0	582	560	816	0	0	394	446	490	426	250	250	0	0	174	452	400	456	586	482	544	532	592	0	600	808	0	0	0	0	818	0	0	376
501	266.04199	15.76	265.035	460	678	812	1006	966	798	0	1192	770	0	0	0	0	810	0	0	0	612	0	0	0	0	0	0	0	0	0	386	0	510	502	614	678	422	426	0	0	554	340	0	0	0	0	834	0	0
502	220.05233	15.78	219.045	16362	18158	17762	21040	0	25920	24848	26758	26654	14996	14656	14088	15270	15524	16602	27768	26332	26164	314	0	0	0	0	0	0	0	0	41132	45492	50026	54540	52582	51828	54398	59388	60444	2830	3074	2848	2562	2184	2508	3276	3098	3066	262
503	385.16031	15.9	384.153	276	408	474	424	562	818	472	548	544	852	938	0	1058	1356	1420	1092	0	0	0	0	0	0	0	0	0	0	0	106	324	390	0	612	426	618	412	458	0	0	0	0	0	0	0	0	0	0
504	136.03472	16	135.027	5922	6234	6598	7492	7270	6712	7012	6754	6210	1534	2178	1674	1282	1590	1452	1656	1568	1698	1182	1226	1346	1096	866	1152	1300	0	1280	4034	6064	6328	8246	8032	7756	7514	6988	6666	0	804	648	596	0	496	706	0	628	0
505	104.00863	16.04	103.001	398	500	850	626	0	828	1078	760	780	770	0	552	370	326	322	932	732	742	478	0	190	254	232	128	0	0	0	366	330	370	356	642	0	664	870	626	294	302	348	236	90	170	264	0	0	0
506	362.02718	16.08	361.02	466	1490	1560	1676	1882	2362	2006	2398	2530	1404	11238	12296	13036	11628	10766	12048	16290	14560	1468	1694	1104	1256	1128	1634	1326	1104	1034	886	944	1136	1044	1334	1394	1368	738	1094	626	774	790	562	640	834	692	422	918	186
507	99.96084	16.18	98.9536	784	582	478	506	422	0	0	478	490	0	0	0	580	696	432	538	614	0	580	606	1206	3018	3788	3958	4188	4692	4676	2832	1676	1306	918	1084	738	804	0	938	0	656	0	944	672	1196	1022	1122	1042	624
508	109.90759	16.23	108.9	0	2702	1654	1928	2386	0	2110	2302	3844	1730	2094	2170	2046	0	1844	3074	4918	5284	1122	0	320	254	66	168	0	0	132	2970	4730	4874	7810	8494	9560	11824	11822	12536	4392	4616	3652	3410	3580	3528	3752	3834	3946	710
509	155.93885	16.29	154.932	0	626	400	358	366	0	262	366	0	816	974	918	614	886	930	570	230	0	0	2626	130	3138	4018	510	6222	6248	6632	1858	1310	784	418	0	0	0	0	0	0	0	0	0	0	0	0	0	0	0
510	189.90056	16.3	188.893	138	648	600	356	316	358	288	358	0	1114	118	1276	1236	1298	1262	210	320	0	2748	2576	2412	232	3300	3934	4202	4328	5278	3060	1458	1366	0	0	0	0	0	0	0	260	0	0	0	0	0	0	0	0
511	323.76789	16.3	322.761	2602	1922	1250	1240	522	0	0	376	562	6814	8106	7928	7034	7582	8730	3810	0	0	0	8102	5370	4774	4652	4286	4024	3084	3214	10826	10268	8940	0	178	0	0	162	0	0	0	0	0	0	0	0	0	0	0
512	331.75776	16.3	330.75	2102	1226	956	830	682	760	0	380	536	6334	7210	8618	6682	6704	6788	3524	0	0	8054	7956	5476	4894	5068	4554	3750	3196	650	11862	10452	8522	0	0	0	0	0	0	0	0	0	88	0	0	0	0	0	632
513	335.79396	16.3	334.787	0	388	194	374	382	306	144	326	276	1112	1186	1632	1162	1288	1280	0	0	0	3218	3612	3364	3616	4218	4894	6118	6118	5570	4858	2200	1470	300	0	0	0	70	0	0	0	0	0	0	150	0	148	0	260
514	205.88535	16.33	204.878	0	0	0	0	0	0	0	164	138	164	0	366	130	130	118	0	340	280	338	0	922	4124	4586	5536	6610	7040	8340	1062	506	0	282	0	286	254	116	276	0	250	0	160	0	0	0	178	130	0
515	195.85619	16.35	194.849	76	0	0	106	762	0	0	0	816	626	0	0	0	0	814	0	130	228	756	270	290	0	4200	3994	3890	3344	4392	2848	0	1006	0	0	0	236	186	120	204	0	238	154	102	198	210	208	0	0
516	443.57024	16.46	442.563	5734	7908	10276	11024	11028	12150	13048	11876	12170	8912	9620	10024	9410	10150	9382	6820	0	0	0	0	236	112	0	0	0	0	0	350	2174	2838	0	0	0	126	0	0	0	0	0	0	0	0	0	0	0	0
517	212.03474	16.53	211.027	404	470	272	0	1024	0	0	1080	1390	1202	1260	1330	312	0	466	400	394	0	374	0	150	120	0	364	0	150	224	140	248	214	298	0	264	262	308	0	412	544	508	514	218	0	374	0	524	0
518	409.95915	16.7	203.972	0	486	2114	982	0	1688	1766	3100	6332	5762	4032	5618	4074	3274	2532	2876	2498	2732	3092	2792	3748	7292	7768	8120	8528	9422	8802	2338	1488	1098	0	1202	1384	1588	1266	1298	1322	1442	1948	2118	2050	2076	2210	2720	2394	662
519	305.68904	16.74	304.682	0	0	0	0	0	0	0	0	0	0	0	0	0	0	0	0	0	0	0	0	0	0	0	0	0	0	0	0	0	0	0	0	0	0	0	0	0	0	0	0	0	0	0	0	0	0
520	303.69044	16.76	302.683	0	0	0	0	0	0	0	0	0	0	0	0	0	0	0	0	0	0	0	0	0	0	0	0	0	0	0	0	0	0	0	0	0	0	0	0	0	0	0	0	0	0	0	0	0	0
521	213.79187	16.87	212.785	564	0	0	824	0	0	0	782	0	320	326	456	0	298	544	512	332	508	374	516	508	402	584	0	568	464	0	430	0	502	0	512	406	262	182	444	40	282	134	134	130	0	0	76	138	662
522	398.01461	16.93	397.007	0	0	0	0	0	0	0	0	0	0	0	0	0	0	0	0	0	526	0	250	414	0	0	0	74	0	0	0	0	0	0	0	0	0	0	0	0	0	0	0	0	0	0	0	0	0
523	267.81067	16.93	266.803	0	0	0	0	0	0	0	0	0	168	0	0	0	70	0	0	0	0	0	0	0	0	0	0	0	0	0	0	0	0	0	0	0	0	0	0	0	0	0	0	0	0	126	0	174	682
524	413.66528	16.94	412.658	0	0	0	0	0	0	0	0	0	0	0	0	0	0	0	0	0	0	0	0	0	0	0	0	0	0	0	0	0	0	0	0	0	0	0	0	0	0	0	0	0	0	0	0	0	0
525	163.97498	16.95	162.968	0	0	0	0	0	0	0	288	0	952	0	1302	1222	0	1458	1636	1502	1790	1928	1902	2258	6084	5522	6498	7756	8188	10776	4972	3462	3010	2016	1402	0	0	456	0	0	1772	2316	2350	2720	2936	2702	3100	3784	2012
526	325.76485	17.03	324.758	0	0	0	0	0	0	0	0	0	0	0	0	36	0	0	262	0	0	0	64	0	152	0	0	0	0	0	0	120	0	0	0	0	358	210	0	1020	1106	990	2012	0	1692	0	0	0	0
527	262.01359	17.19	261.006	1216	1096	1652	1832	1812	2088	1888	1586	1456	0	3594	2078	1416	1670	1428	1320	1554	1516	926	1124	0	0	0	542	606	504	708	676	548	1120	0	712	0	0	504	512	0	0	0	0	0	0	250	334	0	0
528	174.01464	17.77	173.007	4234	3722	3242	2942	2874	2802	2450	1996	1954	1324	1310	1318	1322	1214	1026	0	0	0	474	0	578	288	316	200	164	0	194	0	272	0	0	0	0	0	0	0	0	0	114	0	204	0	172	0	0	134
529	280.04760	17.77	279.04	1414	0	0	1084	1176	1166	1432	1354	1474	0	962	1312	1360	1118	1162	1646	0	1918	572	0	398	258	276	294	232	326	306	13326	6328	3996	3670	3530	3130	2986	2670	3058	410	256	676	596	626	732	902	1068	960	170
530	220.05220	17.86	219.045	5998	6880	7398	8842	10272	9898	10918	11770	12200	5510	6640	6358	5738	5506	5784	12186	12886	13462	220	0	176	172	0	0	0	60	0	0	0	21574	0	26848	26176	28894	30692	30144	1462	1474	1420	0	1286	1120	1622	1430	1442	274
531	130.02461	17.91	129.017	2644	2412	2116	1694	1456	1520	1912	1468	1304	0	0	724	588	0	0	664	456	516	0	330	328	260	174	202	186	170	156	328	296	348	278	322	366	296	212	248	296	112	280	110	202	126	72	138	140	196
532	208.02061	18.18	207.013	398	242	292	308	208	254	380	192	0	168	280	0	236	0	144	166	200	0	226	314	188	212	222	258	202	0	0	354	134	0	0	230	244	0	0	0	0	268	138	128	0	0	248	0	0	232
533	442.09891	18.37	441.092	0	98	0	0	0	0	0	0	0	0	0	0	0	0	0	0	0	0	0	0	0	0	138	0	0	0	0	0	0	0	0	0	0	134	0	0	0	0	0	0	0	0	0	0	0	0
534	463.99142	18.45	230.988	0	0	13708	0	0	0	0	0	0	0	0	0	0	0	0	0	0	0	0	0	0	0	0	0	2078	1804	2054	0	0	0	0	0	0	0	0	0	0	0	1814	1882	1884	0	0	2008	1796	0
535	247.99825	18.58	246.991	7178	7714	7322	8052	8908	0	8234	8612	8470	3690	4216	3578	4190	3976	3444	3144	3410	2650	0	0	0	0	18440	18236	0	0	0	0	13384	13092	0	18378	0	0	0	0	2806	2928	2906	2564	2660	2482	2470	2234	2634	1650
536	130.02496	18.59	129.018	2078	1984	1664	0	1314	0	0	1336	1534	950	582	494	384	772	586	426	0	0	584	440	322	322	212	182	220	0	212	186	372	486	152	448	246	270	306	264	280	232	0	268	114	210	104	190	180	0
537	182.07713	18.65	181.07	5394	4262	4532	5606	4716	4836	4348	5052	5134	3646	4064	3580	4350	3466	3684	8056	0	10936	0	0	0	0	490	0	514	648	0	0	0	0	0	0	0	0	0	23054	1926	1534	2150	2054	1936	2060	2364	2360	2256	744
538	280.04626	18.82	279.039	1384	776	562	550	0	828	1028	1206	1186	730	0	0	0	1026	1010	1404	1722	1800	494	242	0	0	0	176	174	142	0	10502	6144	4036	3998	3772	3500	3316	2658	2540	456	290	538	912	546	700	898	726	0	618
539	80.96249	18.97	79.9552	0	360	462	3666	2626	1736	0	0	1034	1074	1150	1396	0	1408	0	1194	0	1394	1994	1758	3030	5624	4976	5764	6200	6668	6436	2430	1560	1284	0	666	406	750	850	790	1030	0	1288	1576	1728	1722	1746	1834	1606	682
540	337.86425	19.03	336.857	0	0	0	0	0	0	0	0	0	0	0	0	0	0	0	0	0	0	0	0	0	0	956	0	1110	986	0	506	0	0	0	0	0	0	0	0	0	0	196	0	0	214	0	0	242	0
541	220.97421	19.1	219.967	0	0	0	2150	1716	0	0	0	0	0	586	0	788	1020	0	0	0	0	0	1124	1198	1906	2284	1880	1900	1632	2390	0	580	336	0	0	0	0	0	0	188	318	350	300	314	526	312	632	0	258
542	182.07827	19.18	181.071	4660	3300	3370	3796	3760	3738	4100	3894	4202	2686	3344	3476	2922	2722	3084	7690	9172	0	880	852	0	0	0	464	492	564	0	0	0	0	18082	0	18510	0	0	0	1832	1504	2058	1658	1684	2076	2000	2400	2162	0
543	81.92164	19.2	80.9144	354	0	0	0	0	0	0	0	0	380	258	0	324	138	348	236	290	0	146	296	316	182	158	348	146	226	66	324	646	0	572	544	512	0	394	0	168	172	266	90	206	66	144	188	162	0
544	79.92373	19.26	78.9164	0	332	390	0	460	500	0	496	310	0	246	168	184	202	170	302	338	184	234	0	186	204	248	256	248	142	174	370	0	0	412	302	0	314	318	342	120	102	102	154	174	0	78	170	150	406
545	280.04526	19.39	279.038	1144	694	480	562	806	882	656	860	0	460	0	556	986	0	0	1272	1544	1720	136	302	456	136	164	282	0	0	210	0	4832	3586	3536	3102	3180	2912	2902	2706	390	206	658	536	610	0	0	0	0	368
546	442.09730	19.46	441.09	0	0	0	0	0	0	0	0	0	0	0	0	0	0	0	168	0	0	0	0	0	0	0	0	194	0	0	0	0	0	0	0	0	0	0	0	0	0	0	0	0	0	0	0	0	0
547	80.96268	19.48	79.9554	482	0	0	3630	2830	1672	1216	1050	1080	0	1182	1480	1146	1420	1204	1372	1218	1584	1720	2056	2928	5632	5326	5354	6408	6138	6796	2678	1678	0	1220	0	0	0	642	0	1252	1100	1394	1552	1384	1672	1960	1916	1964	0
548	99.96163	19.59	98.9544	1588	0	0	0	0	0	1086	1272	978	0	0	1332	1070	0	1008	1218	942	1390	1512	0	3866	11414	0	11720	14702	0	0	5458	2308	1588	1334	1656	1324	1430	1214	1220	0	1072	1728	1740	2052	2392	2884	2566	2444	0
549	205.98676	19.78	204.979	100	246	0	482	336	302	408	394	0	0	636	626	646	0	0	0	0	0	0	0	0	1310	1654	1348	0	1670	1358	630	0	0	0	264	0	336	0	0	534	600	484	0	0	0	746	0	0	0
550	130.02525	19.91	129.018	1746	1968	1432	1390	1310	0	0	1114	1060	0	788	0	584	770	648	0	0	650	306	246	144	188	222	122	0	246	178	232	190	0	156	224	102	236	372	446	0	294	168	124	316	250	148	128	0	248
551	208.02169	19.93	207.014	500	404	250	270	232	0	0	0	208	242	230	266	128	150	136	0	0	0	0	258	502	110	0	0	130	0	0	0	0	0	0	0	140	0	0	184	0	0	360	0	0	248	0	0	260	146
552	192.02567	0.42	191.018	17464	14164	12068	7856	8718	5740	4254	5616	3692	2376	5014	4756	4690	5282	5622	7864	8618	8386	6512	4814	3718	4700	3780	3470	2464	1872	1740	1144	608	334	754	952	1172	860	912	1176	842	1210	896	914	1094	554	916	806	686	378
553	136.03525	0.44	135.028	2170	2410	2394	2046	2960	2912	2120	2808	2222	434	5516	632	688	450	368	586	502	708	522	550	780	270	102	428	0	314	356	194	920	1900	2454	2956	2678	2736	2808	3090	1326	494	374	282	254	282	214	0	178	212
554	113.99062	0.58	112.983	105318	103076	105090	108504	105250	107848	102424	109450	104116	125396	135948	120786	100092	99234	106508	125554	123730	127008	19090	19176	23690	19938	20940	21048	19406	19482	20820	71652	74106	72954	69592	73434	77316	76934	71454	74720	103198	103054	104186	96728	96112	102138	111554	107640	110508	216346
555	228.08327	0.65	227.076	131092	122338	122860	118424	122328	126230	124174	132274	123074	110454	113260	125814	117250	114096	112810	136490	129338	133254	0	0	940	844	0	0	0	690	0	192218	180000	177100	186946	179372	177578	179828	180672	178076	32300	31738	33298	42966	44054	41308	43828	42196	42302	0
556	125.01231	0.62	124.005	668	0	0	0	732	732	0	724	0	0	3992	3606	1408	1034	1174	700	588	654	2978	86	2846	2984	2782	2656	3606	3912	4148	0	0	0	0	218	0	324	0	130	538	438	468	1370	128	1320	1508	1482	1464	192
557	136.03479	0.68	135.028	0	0	12816	0	13424	13948	13466	14230	14198	5914	0	5872	3854	0	0	4800	4686	4822	0	114	7474	0	0	8032	0	8964	8432	15254	15080	14604	16540	16190	16834	15076	14064	13150	1488	1260	0	0	1938	1808	1462	1350	0	0
558	218.05394	0.66	217.047	0	0	0	0	0	1284	0	1834	0	0	0	0	0	0	0	0	0	0	226	0	0	0	0	0	0	0	0	3326	7010	8468	8528	12188	10630	13210	15744	16236	0	0	0	2900	2972	2808	0	3438	0	0
559	147.05115	0.68	146.044	0	0	0	1650	0	0	1692	1580	0	0	0	9282	0	0	0	7864	0	0	2732	3136	0	0	2726	0	0	2710	2610	0	0	0	0	1340	1050	0	1098	242	0	174	1106	0	0	0	1172	0	0	2054
560	344.13141	0.72	343.124	298	0	0	0	280	198	246	418	198	408	0	0	0	0	0	0	0	0	0	502	612	244	554	424	406	418	620	0	200	262	0	168	0	0	0	130	846	662	760	930	534	590	254	540	648	0
561	182.07677	0.67	181.07	746036	738842	753066	763278	748676	726296	741516	793602	748270	657688	689118	677534	619156	611250	602326	831476	828252	855186	3038	3122	3316	3256	2766	3970	2678	2714	2868	1110768	1158774	1145726	1197244	1188870	1197958	1199286	1187348	1186364	152568	155676	157612	173380	168246	162384	190808	194306	192232	1114
562	103.96181	0.67	102.955	22810	25306	27288	27718	27888	26354	27474	27076	26686	31314	33620	30780	27702	25444	27972	28252	29080	27134	2580	2054	1926	8698	1674	1674	3754	1322	4458	7456	13064	15902	15928	15150	15576	12704	14986	14156	21394	21968	20668	22434	19848	23360	27726	30686	26006	60278
563	125.99632	0.71	124.989	1158	0	1104	1218	0	0	1268	1102	1454	2558	2970	2528	1768	1700	1844	1838	1602	1828	274	0	410	0	0	0	0	0	0	0	0	0	0	0	0	0	0	0	0	408	498	0	0	392	356	534	546	426
564	318.06156	0.72	317.054	0	0	0	7938	0	0	7544	8628	0	34040	28370	30630	18172	19226	19054	31728	28112	30640	0	0	119822	138324	129920	147570	123392	119332	130258	2794	3900	2728	5514	0	0	0	0	0	21114	19970	19412	28572	26186	25546	20172	19006	18374	2250
565	268.07872	0.84	267.071	0	654	992	1422	954	884	0	1050	0	0	5096	0	0	0	0	2088	2374	2212	142	372	0	648	338	0	500	0	0	0	280	276	0	0	346	414	330	442	0	0	0	0	0	2018	0	1718	0	204
566	183.05429	0.85	182.047	0	0	0	0	0	0	0	0	0	24452	27980	25952	37836	35420	33044	44998	45374	43304	296	0	236	404	394	0	350	374	544	0	0	0	0	0	0	0	0	0	6370	6446	6764	6320	7228	6650	6784	6742	5950	0
567	156.00693	0.86	155	4550	4602	4562	3620	4234	3712	4104	4794	4356	1984	1784	0	2448	2568	2846	3436	3648	3452	373590	372156	264294	311214	308448	392906	292708	304650	300112	4826	4476	4308	4614	6028	6294	5590	4880	5892	1634	0	1392	1220	1484	1232	1412	1450	1638	0
568	318.06103	0.89	317.054	9070	8778	8590	5888	7748	6682	6446	5424	7962	0	0	0	0	0	0	0	0	0	191078	173784	0	0	0	0	0	0	0	3984	2554	2522	3170	0	3018	4612	4834	0	0	0	0	0	0	0	0	0	0	2232
569	218.05367	0.88	217.046	639086	628938	635878	629658	619036	619386	615442	690204	622116	584542	644540	575538	556950	558796	575078	665864	668390	672584	960	846	712	576	0	0	0	0	0	755422	785534	793302	760562	791128	812712	838488	833890	867432	105844	100226	113606	121412	121690	131390	134044	134050	138678	244
570	147.05112	0.89	146.044	3586	1498	1550	1664	3624	2776	3552	4484	4124	19012	22138	18428	16334	15830	15226	18588	18078	18068	3578	3976	3130	2800	2554	2886	3850	2902	3206	1882	1646	2392	1798	2338	2254	1896	2190	2198	2110	1910	1658	2466	2750	2406	1868	2922	3016	2856
571	180.06162	0.89	179.054	1906	2386	4820	1788	2490	1620	2116	2420	2480	1974	2324	2400	2004	1616	2318	2636	2812	2628	2824	684	2840	2346	3106	0	2868	3154	3758	3696	1702	1490	3946	2264	1664	2186	1992	2074	3426	3788	3240	4008	4156	4114	4488	1568	3818	136
572	182.07714	0.92	181.07	0	74604	74934	75198	69348	71412	71132	74338	69876	0	0	0	0	0	0	0	0	0	0	548	2892	0	0	0	144	0	2796	0	0	0	0	0	0	0	0	96306	0	0	0	0	0	0	0	0	0	74
573	136.03485	0.95	135.028	11942	13704	0	13092	0	0	0	64226	0	11250	20066	11870	3488	9372	3596	11076	11202	9942	10260	10826	9064	10110	9750	10690	10870	11184	10454	70444	75000	75534	89308	87794	81136	79034	75026	79256	2106	1568	2016	2342	2240	2550	2154	2798	2494	2574
574	118.02421	0.94	117.017	0	3298	0	0	22846	0	0	24162	20298	37186	48680	35972	37430	39716	37978	78074	80172	74100	10582	12202	11452	10456	11194	11712	11956	11680	12290	31214	0	34818	0	38356	39600	36046	36370	38914	10818	9914	9120	13000	13300	13108	13588	17734	15188	8542
575	134.01924	0.96	133.012	2546	1760	2960	0	1826	1854	0	8710	0	3686	5110	3396	3544	3164	3148	5248	5050	4858	0	0	6046	6654	8026	6794	8826	8844	8550	0	0	3138	0	0	0	0	0	2976	2782	2270	2606	0	0	2992	3852	3164	3106	2336
576	296.05906	1	295.052	0	0	0	0	0	0	0	0	0	0	0	0	0	0	0	0	0	0	0	0	0	290	0	0	0	390	0	0	0	0	0	0	0	0	0	0	0	0	0	0	0	0	764	0	0	0
577	60.01977	1.02	59.0125	0	1578	0	0	0	0	0	1730	0	0	1720	0	1094	1624	0	1554	1446	0	1742	1498	1762	1578	1668	1616	1816	1702	2096	1528	1506	0	1750	1690	1682	1434	1130	1548	1214	1094	1284	1408	1222	1388	1212	1618	0	500
578	104.00853	1	103.001	0	0	0	0	0	1300	1496	1832	2104	1388	1266	0	1170	1282	920	1344	1222	1240	0	0	188	1250	952	1300	0	0	1324	1318	0	0	0	0	1644	0	0	1316	0	354	0	372	0	0	0	0	0	0
579	542.15971	1.01	541.152	0	0	0	0	0	0	0	0	0	0	0	0	0	0	0	0	0	0	0	0	0	0	0	0	0	0	0	0	0	0	0	0	0	0	0	0	0	0	0	0	0	0	0	0	0	0
580	148.03529	1.01	147.028	3088	2194	0	0	2946	2376	1896	2570	0	1134	1506	2250	1806	0	0	1370	0	2244	2406	1832	1488	1352	1520	1460	1488	1618	1676	2338	1974	2506	2284	2818	2454	2014	2454	2354	1030	1288	1498	1498	1412	1696	1400	1346	0	326
581	268.07835	1.02	267.071	3562	2030	0	4632	0	4630	996	3840	0	0	6612	3248	0	3482	2492	0	5398	0	524	720	256	620	894	572	148	706	692	0	0	2340	0	496	2500	476	2306	0	0	0	1192	1928	1824	1900	1512	1876	1794	580
582	169.84119	1.02	168.834	0	0	0	0	0	0	0	0	2934	0	3768	0	0	7152	0	2850	2712	2672	0	0	0	2598	4332	4296	2892	2850	2856	0	0	0	0	0	1398	0	0	0	6806	6812	6412	6904	7366	7146	6450	5706	6274	0
583	283.77746	1.07	282.77	0	0	0	0	0	0	0	0	0	778	1476	714	0	0	0	0	716	792	68	270	0	118	162	0	0	0	0	0	0	0	0	0	0	0	0	0	2392	2308	2134	1710	1712	1686	2510	2890	2624	17728
584	129.89703	1.05	128.89	86134	81570	82792	87246	84952	86562	96546	117192	100874	106562	126656	95360	88538	88796	83626	95450	95078	95716	52692	61248	55860	70706	69170	75520	73604	72470	72290	73640	73990	70926	70994	71224	70482	66226	68256	68700	114198	110076	113514	105126	105318	100474	126506	124934	125232	232500
585	130.89778	1.04	129.891	9086	10364	10120	9504	10076	10418	12866	14834	11852	10898	17880	10818	10762	10972	11174	12606	11726	11558	7092	7600	7692	8692	8072	9720	9174	8404	8670	9034	9026	8350	9562	7388	8358	8340	8784	8288	12716	13056	13090	13298	12998	12098	15566	15622	15136	27200
586	491.18500	1.06	490.178	0	0	0	0	0	0	0	0	0	0	0	0	0	0	0	0	0	0	0	0	0	0	0	0	0	0	0	0	0	0	0	0	0	0	0	0	0	0	0	0	0	0	150	0	0	0
587	233.84995	1.04	232.843	916	0	1062	1396	1066	0	0	1310	0	0	2578	0	0	1440	0	0	352	2280	26358	29300	27208	11014	10058	11156	12088	11278	11786	0	1630	1098	1336	1950	0	0	1012	1110	34434	35210	31912	28976	28586	28938	22148	18622	23858	25134
588	160.91141	1.04	159.904	238	154	100	170	210	214	340	378	160	652	628	688	1126	850	748	600	704	858	336	974	3640	3114	2484	2118	5480	5432	6892	142	96	156	96	250	306	168	218	54	392	544	654	254	244	252	1132	1312	1566	8268
589	480.11453	1.05	479.107	0	0	0	0	0	0	0	0	0	0	0	0	0	0	0	0	0	0	0	0	0	0	0	0	0	0	0	0	0	0	0	0	0	0	0	0	0	0	0	0	0	0	0	0	0	0
590	133.89137	1.05	132.884	31348	31720	34064	36638	36490	38502	40462	46496	40618	41406	50580	41180	34222	36728	36674	42986	40318	37390	23392	25918	24854	28750	28978	31058	32010	31442	30146	29318	28312	27920	28656	28664	28892	26076	27956	29998	47804	44600	43952	41396	39194	41926	50252	53100	51774	89758
591	218.05429	1.05	217.047	0	0	0	0	0	0	0	0	0	0	0	0	0	0	0	0	0	0	0	0	0	0	0	0	0	0	0	0	0	0	0	0	0	0	0	0	0	0	0	0	0	0	0	0	0	570
592	192.02534	1.05	191.018	0	0	0	0	0	0	0	0	0	0	0	0	0	0	0	0	0	0	908	642	4316	0	1230	1584	0	356	0	1632	0	4066	0	8190	0	0	1876	0	0	544	0	0	230	458	2012	1926	1988	528
593	213.95358	1.05	212.946	798	0	552	630	0	0	746	950	588	0	0	0	488	0	244	0	0	0	12246	11524	10906	8240	7602	7718	7204	7292	7184	0	602	820	0	750	0	0	0	0	0	396	0	0	0	0	230	0	0	0
594	196.05581	1.05	195.049	0	0	0	0	0	0	0	0	0	3128	0	0	0	0	0	0	0	5708	0	0	1832	0	0	0	1702	0	0	0	0	0	0	0	0	0	0	11962	0	0	0	0	0	0	0	0	0	0
595	527.18787	1.06	526.181	0	0	0	0	0	0	0	0	0	0	0	0	0	0	0	0	196	0	0	0	0	0	0	0	0	0	0	0	0	0	0	0	0	0	0	0	0	0	0	0	0	0	0	0	0	0
596	318.06138	1.07	317.054	0	5854	5058	5476	0	0	0	5760	0	0	0	0	0	0	0	0	0	0	0	0	0	0	0	0	0	0	0	0	4488	3506	2812	3824	4558	3424	0	0	12600	11256	12354	0	18176	0	0	0	0	1524
597	155.91143	1.07	154.904	0	0	0	0	0	0	0	0	0	0	0	0	0	0	0	0	0	0	1708	2354	2626	10338	12630	12028	11956	11878	11420	1728	2288	632	0	0	0	302	0	318	0	0	0	0	0	0	3176	3140	0	0
598	97.96489	1.07	96.9576	0	2952	2520	6412	2078	1992	2118	2266	2934	2062	4106	3046	2846	3192	2072	2470	2100	3222	8162	7410	11824	0	0	0	0	0	0	0	5718	4786	3454	3424	2872	0	2098	0	2888	2588	4934	0	7906	8126	7666	6830	6524	0
599	159.98402	1.08	158.977	0	0	0	0	0	0	0	0	0	0	0	0	0	0	0	0	0	0	0	0	0	0	670	0	372	0	476	0	0	0	0	0	0	0	0	0	0	0	0	0	0	0	0	0	0	210
600	272.10991	1.12	271.103	0	0	0	0	0	0	0	0	0	0	0	0	140	94	0	264	0	0	0	0	0	0	0	0	0	0	0	0	0	0	0	0	0	346	0	0	0	0	0	0	0	0	0	0	0	0
601	147.05104	1.11	146.044	2512	3724	3294	3818	2700	3784	2698	2580	3124	0	5020	0	5554	0	8660	0	0	0	1904	0	3750	3246	1734	1898	1640	1628	3298	1288	1388	1180	2078	0	1998	0	0	1462	1018	0	0	1072	1074	1178	1086	0	0	7648
602	281.78113	1.09	280.774	0	0	0	0	0	0	0	0	0	0	0	0	0	0	0	0	0	0	0	0	0	0	0	56	0	106	0	0	0	0	0	0	0	0	0	0	1350	1396	1228	1386	1106	1212	1320	1568	1574	8582
603	287.77194	1.11	286.765	0	648	0	0	0	0	0	836	0	304	172	0	198	374	0	438	264	482	108	232	128	0	0	0	210	0	0	0	180	396	338	0	0	398	328	286	1258	1656	1464	940	810	954	1556	1466	1504	9046
604	243.87899	1.1	242.872	0	0	0	0	0	0	0	0	0	0	0	0	0	0	0	0	114	0	0	22546	26894	0	0	0	0	0	0	0	0	0	0	228	0	0	198	0	6854	7472	6528	6324	7044	7266	3036	1356	2888	0
605	174.01458	1.12	173.007	2552	2000	0	2288	3018	2402	2788	2068	2030	0	0	2248	2022	0	0	0	2832	3416	218	404	0	0	808	886	178	0	220	0	0	574	0	0	0	0	0	258	0	0	132	0	0	204	248	244	166	0
606	319.06455	1.13	318.057	0	0	1800	0	2080	1554	1768	2296	1738	4168	8232	4162	4478	2452	2744	2676	4640	3224	20360	18970	5062	0	0	0	8934	4456	0	0	0	0	0	0	0	0	0	0	1698	2116	1798	2528	2286	2108	1872	1940	2324	456
607	407.61078	1.1	406.603	0	0	0	0	0	0	0	0	0	0	0	0	0	0	0	0	0	0	0	0	0	0	0	0	0	0	0	0	0	0	0	0	0	0	0	0	0	0	0	0	0	0	0	0	0	0
608	318.19808	1.11	317.191	0	316	0	0	0	0	0	0	0	0	0	0	0	0	366	0	0	0	0	1114	1496	0	0	0	0	0	0	0	0	0	0	0	0	0	0	0	0	0	0	0	0	0	0	0	0	74
609	637.13826	1.14	317.562	0	0	0	0	0	0	0	0	0	0	0	0	0	0	0	0	0	0	0	108	0	0	0	0	0	0	0	0	0	0	0	0	0	0	0	0	0	0	0	0	0	0	0	0	0	0
610	170.99480	1.11	169.988	0	0	0	0	0	0	0	884	0	0	1174	0	0	0	0	0	0	0	4532	2550	3948	7608	0	0	702	0	526	0	414	0	0	0	698	0	0	0	366	0	1326	0	0	242	186	124	0	0
611	320.06077	1.12	319.053	0	0	0	0	0	504	0	1244	0	4432	2518	2386	2492	0	1838	2976	3812	2186	6758	5326	7816	4344	3186	6198	5470	3240	2812	332	0	588	1144	0	0	496	288	0	1718	2056	0	1860	1442	1452	2036	0	0	0
612	188.84484	1.14	227.809	436	284	298	420	308	360	522	778	410	630	964	602	362	576	332	698	454	654	1004	1302	1104	1162	972	1326	840	1048	796	238	272	238	0	322	292	448	364	328	6504	5026	5714	4638	4716	4748	6008	6510	5418	3450
613	225.81829	1.13	224.811	0	1600	1794	1822	1764	2230	2310	3650	2640	3686	5946	3066	2222	2192	1648	3642	3712	3084	4818	8932	6318	5184	4688	6702	5070	4258	3860	1334	1206	1266	1324	1292	1424	1500	0	1388	30162	25930	31854	22366	23912	27012	27662	34498	31198	19260
614	229.81253	1.16	228.805	0	0	0	0	0	1122	0	1246	0	1310	2104	1330	464	372	386	0	1048	428	1944	3830	2124	1802	1350	2752	1590	1600	1656	0	0	586	0	424	512	0	508	1204	11684	9758	11352	8718	9098	8298	10904	13432	11074	6968
615	134.01894	1.17	133.012	0	0	0	0	0	0	0	0	0	3516	4284	0	3080	3268	0	4262	0	0	0	0	5986	5400	5422	4930	5672	5998	5362	25422	0	0	0	0	0	0	0	0	0	3086	4384	0	5910	4030	3824	0	3246	0
616	90.02938	1.13	89.0221	2336	2010	2262	1876	2208	1974	2516	1796	2042	1592	0	1138	0	1232	1110	0	1248	1304	1516	1442	0	912	1346	0	0	1762	1514	4932	5136	5934	6408	6250	0	5834	5198	5262	0	0	0	1782	1630	1560	1280	1900	0	0
617	233.77517	1.16	232.768	0	0	0	0	0	0	0	0	0	0	0	0	0	0	0	0	0	0	0	0	0	0	0	0	0	0	0	0	0	0	0	0	0	0	0	62	0	0	0	0	0	0	0	0	0	0
618	156.91618	1.13	155.909	644	666	658	1060	670	952	872	1280	972	2648	2486	3126	134	4034	5262	3386	3258	2924	1022	5316	17156	13004	16558	11426	28714	31044	34790	0	788	0	752	562	728	0	0	0	1170	1524	1982	1106	1362	1322	5942	5006	6822	39566
619	194.03037	1.16	193.023	0	0	0	0	914	0	0	0	0	0	0	640	1842	0	0	0	0	1358	0	0	0	0	0	0	0	0	0	0	0	0	0	0	0	0	0	0	0	0	0	0	0	0	0	0	0	0
620	403.61645	1.13	402.609	0	0	0	0	0	0	0	0	0	0	0	0	0	0	0	0	0	0	0	0	0	0	0	0	0	0	0	0	0	0	0	0	0	0	0	0	0	0	0	0	0	0	0	0	0	0
621	127.90990	1.13	126.903	0	0	1102	1136	1342	1194	1198	1318	1734	0	0	0	0	0	0	0	0	500	474	428	532	266	384	388	0	202	0	0	888	0	0	0	976	1160	1204	0	0	0	996	0	986	0	0	0	0	532
622	129.04088	1.13	128.034	0	0	0	0	0	0	0	0	0	0	0	0	0	0	0	0	0	0	4900	3120	0	3440	2494	0	2494	0	0	0	0	0	4762	0	3710	0	4192	0	0	1822	2632	0	2298	3280	3262	2758	3010	0
623	133.86501	1.17	168.835	2672	3588	3938	3316	4098	3356	4624	4174	4204	10282	16266	10596	7514	11396	10758	10278	6562	5532	19336	19326	11702	17292	17014	18538	11920	10806	7326	2876	2578	2310	2214	2996	1752	0	0	0	9178	12838	9006	13130	9098	9034	7152	10962	10914	3076
624	183.93636	1.15	182.929	0	0	0	0	0	0	0	0	0	0	0	0	0	0	716	0	0	0	0	1606	12098	7646	10688	6074	38344	40146	43552	0	0	0	0	0	0	0	0	0	0	0	0	0	0	0	0	0	0	20162
625	171.83870	1.18	170.831	3600	5052	5290	6672	5422	6572	6836	7286	5942	14554	16266	14620	10218	11396	10758	10278	8942	7880	19336	19326	16354	17292	17014	18538	11920	10806	10052	4348	3892	4022	3362	2922	2720	1796	1840	1846	13648	12838	13114	13130	12876	12562	10910	10962	10914	4190
626	156.00680	1.16	155	0	3740	0	4058	0	5906	0	0	3942	2318	2220	2376	0	0	2458	0	0	4430	0	0	0	0	0	0	0	0	0	5196	0	0	0	0	0	0	5274	0	0	0	0	0	0	0	0	0	0	0
627	145.87482	1.13	144.868	11294	11350	11494	11912	10666	11030	10514	10260	10714	17180	20476	18242	18228	18098	17364	16322	14292	14058	1606	1328	1502	1468	1668	1658	1170	342	924	4748	3060	2848	2718	2154	2358	2000	1888	2192	18586	14680	14474	0	0	13786	16236	17640	14826	3564
628	130.02427	1.2	111.006	0	2888	4616	0	0	5396	0	5920	0	1916	3108	0	0	0	0	0	0	0	0	0	0	0	2434	576	0	2800	0	2542	2642	1900	0	1938	1926	0	1532	1950	0	0	0	0	428	0	1732	0	0	338
629	74.03523	1.19	73.028	5392	5674	5270	5396	5576	0	0	5212	0	9316	0	8702	8804	9546	9808	15994	0	14740	3404	2282	2236	2012	1950	3332	3294	1900	1718	7538	7798	8356	8446	2620	0	0	9518	8002	2862	2034	2562	2354	2208	2278	1854	1874	2882	2300
630	133.03543	1.22	132.028	7598	8134	9248	10462	0	0	3580	0	9170	5190	0	5330	4930	4722	5610	3304	3818	2794	2504	1994	1554	634	860	0	3346	1728	1054	4094	5142	5432	5668	5110	5840	2814	2262	3282	0	984	1102	0	0	0	1336	0	0	1348
631	165.94057	1.17	164.933	0	0	620	0	362	0	0	0	0	0	0	276	0	152	0	152	0	152	7448	6310	8184	15944	16578	14808	14258	14594	14928	0	0	0	0	0	0	0	0	0	0	0	216	210	148	418	0	464	0	196
632	199.01351	1.17	198.006	310	464	342	308	260	0	416	292	314	538	0	0	600	0	864	0	980	1168	0	0	1052	0	0	0	0	0	0	446	0	376	296	258	414	0	400	472	0	0	0	0	0	0	0	0	0	0
633	218.05420	1.17	217.047	0	0	0	0	0	0	0	0	0	0	0	0	0	0	0	0	0	0	0	0	0	0	0	0	0	0	0	0	0	0	0	0	0	0	0	0	4772	5296	6738	5508	4870	4908	0	4116	5592	300
634	109.90687	1.18	108.9	0	0	0	0	0	0	0	0	0	10244	0	0	0	0	0	0	0	6002	338	280	0	72	0	0	0	0	266	0	0	0	0	0	0	0	0	0	3342	3968	0	2318	1656	5304	3976	0	7250	0
635	161.84764	1.18	160.84	0	12796	0	10450	5990	6316	6574	8322	7330	7166	8128	7258	8028	8366	8060	7214	6388	6832	2230	3042	3954	6672	5910	6670	7628	6988	7540	14416	0	10712	0	0	8298	7662	0	0	0	13828	14642	0	14956	13142	0	17252	16866	0
636	262.03624	1.18	261.029	0	788	0	0	0	0	0	0	0	1262	1526	0	0	1112	0	1564	1644	0	0	0	0	0	2650	2514	2868	0	3374	0	1142	0	0	0	1060	0	1232	1322	0	538	0	738	0	420	834	418	0	0
637	323.73615	1.23	322.729	952	0	798	918	0	0	0	892	0	0	0	0	594	0	0	0	0	0	100	628	482	220	380	464	392	436	344	0	0	0	342	504	0	0	588	0	3904	3250	3534	2358	3046	3198	2744	4838	4260	0
638	322.73959	1.19	321.732	0	148	0	0	0	0	68	262	0	0	208	62	0	0	0	150	0	0	222	506	212	246	0	302	152	182	168	0	76	58	222	0	0	122	194	198	1750	1398	1696	1096	1292	1260	1862	2086	1960	340
639	319.74169	1.2	318.734	0	0	0	0	572	668	0	0	0	0	228	0	526	0	0	0	0	0	732	826	746	380	196	492	520	308	518	0	0	0	0	176	0	0	0	0	4058	3846	4252	2812	2618	3852	4128	5726	2892	0
640	118.02421	1.2	117.017	21258	20994	21066	21708	0	22834	21188	0	0	33950	0	35308	0	0	0	0	0	0	11614	8706	7792	0	6952	0	5622	3752	6308	0	33254	0	37200	0	0	0	0	0	0	0	6974	7888	0	7372	7274	6536	0	0
641	253.90783	1.2	252.901	0	0	0	0	0	0	0	0	0	0	0	0	0	0	0	0	0	0	0	0	9402	0	0	0	0	0	0	0	0	0	0	0	0	0	0	0	0	0	0	0	0	0	0	0	248	0
642	257.09989	1.21	256.093	1776	0	2444	0	0	686	2200	2726	1878	0	0	0	10170	0	4758	0	3570	3880	494	0	184	0	0	0	0	226	0	2356	2552	2880	1630	0	0	3268	2954	2594	0	0	1272	0	0	0	636	0	0	0
643	380.10781	1.22	379.101	430	388	506	590	388	500	540	0	440	1104	0	1412	1342	1220	1360	0	738	1334	0	0	0	0	0	0	0	0	0	374	228	0	0	408	714	0	0	0	0	0	232	0	0	210	288	0	0	0
644	151.89277	1.23	150.886	0	2222	1304	0	0	0	0	0	0	1952	2556	1870	1684	1728	0	0	0	0	0	806	0	0	0	0	578	0	0	0	1148	0	0	0	0	0	0	0	4158	0	3038	1952	0	2500	2736	2488	2686	7466
645	196.05652	1.23	195.049	10488	11118	11150	11950	12310	11966	12478	10590	10916	6354	5226	5968	5196	5334	5438	7148	6188	6056	2086	1576	1164	0	0	0	0	1726	0	10202	10748	12356	12740	13038	13058	11692	11744	0	1692	1754	1462	1678	0	0	1352	1474	1386	654
646	136.03490	1.27	135.028	56338	57612	59360	62656	63764	60750	59036	0	55238	17960	15588	17238	13204	12816	13642	12786	10582	11714	12586	10814	7944	5944	5970	0	0	2768	4280	0	0	0	0	0	0	0	0	0	3042	2320	2398	1984	2502	2334	2270	1764	1962	1970
647	166.04585	1.24	165.039	30826	32874	32848	33830	36506	31978	34828	32106	34436	15710	13410	15370	12504	12366	13020	13508	12792	13158	1868	1434	1134	412	0	0	0	1084	0	0	33740	33546	39374	39664	40932	36700	35898	0	1530	1558	1236	1512	0	1476	1176	0	1210	974
648	227.04500	1.24	226.038	424	568	638	542	446	0	0	438	0	0	358	342	0	230	0	0	0	0	11528	8736	7466	5524	5724	3868	3418	4072	4224	424	452	350	0	0	1322	1588	668	638	212	0	0	0	374	190	0	170	272	0
649	139.92586	1.23	138.919	3452	2908	2908	2384	3066	0	2956	2982	2662	2712	0	0	0	0	0	2680	0	0	2152	0	0	0	0	9588	0	9846	0	3274	3794	3446	4036	3664	4064	4964	4738	5318	3748	3420	6344	4418	3292	3320	4474	5674	4464	0
650	88.01359	1.24	87.0063	1184	928	1398	0	1498	1172	1608	1952	1174	1386	4414	1576	0	2850	1368	1538	1490	3330	0	0	388	614	0	680	310	600	964	622	718	592	804	1220	1052	382	0	874	274	0	224	0	240	400	308	342	356	146
651	132.00358	1.24	130.996	0	0	0	0	1018	1258	1314	712	0	0	0	2286	910	0	0	1250	1982	1152	0	0	0	338	0	206	324	376	248	328	0	0	0	0	0	564	0	0	0	0	0	0	0	0	0	0	0	0
652	662.19078	1.26	661.184	0	0	0	0	0	0	0	0	0	206	462	0	0	0	0	0	0	0	0	0	0	0	0	0	0	0	0	0	0	0	0	0	0	0	0	0	0	0	0	0	162	0	0	0	0	0
653	192.02497	1.24	191.018	0	0	0	0	0	0	0	0	0	0	0	0	0	0	0	0	0	0	0	0	0	0	0	0	0	0	0	0	0	4324	0	0	0	0	0	0	0	0	0	0	0	0	3080	1702	3246	0
654	318.74395	1.28	317.737	0	0	0	0	0	0	0	0	0	0	0	0	0	0	0	0	0	0	176	88	0	0	0	0	0	0	122	0	0	0	0	0	0	0	0	0	700	610	688	530	498	478	628	972	1170	0
655	338.08711	1.23	337.08	0	382	0	0	358	398	0	0	450	238	366	0	0	0	0	0	0	0	230	0	0	0	0	0	0	0	0	426	0	382	0	500	472	348	0	0	0	0	0	0	0	0	0	0	0	0
656	249.97188	1.27	248.965	0	0	1512	1652	1750	0	0	2264	2182	0	0	0	2334	2012	2114	2858	3356	3712	0	0	0	0	0	0	0	974	0	0	404	0	0	0	0	0	0	0	0	0	0	0	0	0	0	384	664	0
657	480.11381	1.23	479.107	0	0	0	0	0	0	0	0	0	0	0	0	0	0	0	0	0	0	0	0	0	0	0	0	0	0	0	0	0	0	0	0	0	0	0	0	0	0	0	0	0	0	0	0	0	0
658	233.85008	1.26	232.843	176	1228	0	142	0	1134	1640	268	1272	2576	240	2690	1708	0	1368	2350	2050	178	0	0	16468	0	0	6846	152	0	0	0	0	384	378	148	0	446	0	0	0	19752	0	0	0	0	0	13084	0	3428
659	445.64959	1.27	444.642	0	0	0	0	0	0	0	0	0	0	0	0	0	0	0	0	0	0	0	0	0	0	0	0	0	0	0	0	0	0	0	0	0	0	0	0	0	0	0	0	0	0	0	0	0	0
660	406.02409	1.28	405.017	0	0	0	336	0	0	0	0	0	0	0	0	244	0	0	0	0	206	0	310	0	0	0	0	502	0	0	0	0	0	176	0	0	0	0	0	0	0	0	0	0	0	0	0	0	0
661	318.11424	1.29	317.107	2012	2900	3170	3000	3160	2284	2854	0	2670	0	0	0	0	0	0	0	0	0	0	0	0	0	0	0	0	0	0	0	2506	4138	0	2768	2824	2602	0	0	0	0	0	0	0	0	0	0	0	0
662	180.06166	1.31	179.054	1972	1980	2300	2544	2530	2228	2558	2064	2332	2020	1636	1800	3014	2644	2776	2758	2760	2510	266	0	0	0	0	0	370	0	0	1814	0	1746	2054	1958	1970	2436	1752	1536	1138	0	0	0	0	0	0	0	0	0
663	278.09891	1.29	277.092	3154	4318	3726	3796	5552	4028	0	3120	5900	0	0	4844	0	3568	0	0	0	0	0	0	0	0	0	0	0	0	0	0	1454	1440	1364	0	1620	1420	0	1614	0	0	0	0	0	0	0	0	0	0
664	60.02030	1.32	59.013	0	2222	1908	1910	2322	2024	0	1920	2762	2134	1958	0	1712	1844	2254	1920	2212	1602	1794	1816	1916	1820	0	0	1558	1384	1430	1986	1544	1584	2330	1826	2136	2554	1732	2570	1120	1330	1416	1462	1538	1464	1754	1722	1890	296
665	233.77557	1.33	232.768	0	0	0	0	0	0	0	0	0	0	0	0	0	0	0	0	0	0	0	0	0	0	0	0	0	0	0	0	0	0	0	0	0	0	0	0	0	0	0	0	0	0	0	0	0	0
666	125.99643	1.32	124.989	1350	1260	1432	0	1446	0	0	0	1536	3416	3446	2964	1982	1880	1902	1822	1520	1924	0	0	0	0	0	0	0	0	0	0	1294	1170	1300	0	0	0	1298	1258	0	256	480	0	0	438	822	0	0	814
667	129.04024	1.31	128.033	12614	12510	11772	12792	13054	13940	13280	13932	13628	45964	41416	41106	40498	40454	42028	36338	37840	36312	4402	4104	3904	3292	2312	2844	2656	2656	2624	6710	7618	8660	8898	8842	9638	9194	9414	10358	3136	3038	3324	4920	4358	3724	3250	3540	3802	9764
668	132.04032	1.29	131.033	3212	3746	3500	3578	3570	3620	3648	3406	3412	5012	4480	4542	3846	4596	4352	3918	4306	4000	0	0	0	1412	0	0	0	0	0	2158	2550	3456	2550	3018	3110	2792	2826	3228	11198	9440	9760	9986	9940	9188	10496	9864	10934	2194
669	268.07840	1.32	267.071	5084	0	0	6620	0	6248	0	6146	6290	11918	11694	11596	10736	10996	10810	12468	12526	12300	926	714	0	770	0	588	532	358	590	2392	2598	2642	2652	3018	3130	2754	2504	2772	0	2272	2226	3362	3422	2926	2250	1982	1946	670
670	299.91178	1.29	298.904	0	0	0	0	0	0	0	0	0	0	0	0	0	0	0	0	0	0	130	1344	236	0	0	668	202	0	500	0	0	0	0	0	0	0	0	0	0	0	0	0	0	0	0	612	0	0
671	93.93289	1.3	92.9256	17746	18294	17002	17442	18426	18996	16096	18110	16948	10118	11216	10260	11770	11086	11852	10028	9562	8996	964	0	0	0	0	664	656	502	714	10448	0	9736	9828	8580	10118	10256	0	0	4518	4688	4732	3728	3992	3920	6262	4874	4818	66924
672	559.59939	1.31	558.592	0	0	0	0	0	0	0	0	0	0	0	0	0	0	0	0	0	0	0	0	0	0	0	0	0	0	0	0	0	0	0	0	0	0	0	0	0	0	0	0	0	0	0	0	0	6970
673	318.06143	1.31	317.054	0	0	0	0	0	0	0	0	0	0	0	0	0	0	0	0	0	0	0	0	0	0	0	0	0	0	0	0	0	0	0	0	0	0	0	0	0	0	0	0	0	0	0	0	0	3350
674	459.09194	1.32	458.085	2452	2218	2620	2550	2210	2738	2530	3032	2260	4772	3072	4496	8420	8836	8506	3836	0	3734	0	0	0	0	0	0	0	0	0	1890	2220	2594	2712	3038	2896	2416	2246	2610	0	200	220	0	0	0	0	162	0	0
675	260.00120	1.33	258.994	0	0	0	0	0	0	0	0	0	0	0	0	0	0	0	0	0	0	0	0	0	0	0	0	0	0	0	0	0	0	0	0	0	0	0	0	0	0	0	0	0	0	0	0	0	0
676	165.94066	1.36	164.933	0	0	0	0	0	0	0	0	0	0	0	0	0	0	0	0	0	0	230	242	0	0	0	0	1006	0	0	0	0	0	0	0	0	0	0	0	0	0	0	262	0	154	384	0	426	0
677	97.96494	1.35	96.9577	3778	2368	2028	1872	2030	1942	2228	2272	2718	1808	1892	2938	2462	3008	2178	2078	2102	2068	5096	3654	4110	0	0	0	0	0	0	0	5240	3324	2302	2970	2534	0	2270	2040	2656	2110	3394	5982	6626	7536	7890	7366	6488	1588
678	218.05405	1.34	217.047	0	0	0	0	0	0	0	0	0	0	0	0	0	0	0	0	0	0	0	0	0	0	0	0	0	0	0	0	0	0	0	0	0	0	0	0	0	0	4136	5692	3868	5220	5292	5146	5962	284
679	262.03563	1.36	261.028	0	0	0	0	0	0	0	0	0	0	0	0	0	0	0	0	0	0	0	0	2140	3636	3014	3180	3850	0	0	0	0	0	0	0	0	0	0	0	0	0	0	0	0	0	0	0	0	0
680	156.00690	1.34	155	5294	3828	0	5822	5852	6034	4872	6944	5362	2412	2488	2690	3676	0	3772	3906	4028	5458	277730	243752	237748	249304	245850	245600	210190	203726	192012	0	0	0	0	0	0	5412	5910	0	0	0	0	1280	1196	0	1336	1390	0	0
681	104.00828	1.34	103.001	2494	1742	4918	0	3450	0	0	2764	4202	3236	3318	3122	4190	2942	3194	3796	1486	4040	2124	1984	1566	1266	1340	1280	1170	1338	1448	1682	2584	3082	0	2188	5594	3654	2034	2572	0	1304	1538	1056	474	0	0	0	1924	142
682	128.00866	1.34	127.001	730	558	688	688	596	674	820	744	792	646	430	388	894	496	430	484	468	586	858	586	0	0	390	360	288	462	300	550	570	656	632	584	400	482	578	444	1002	812	852	1126	1060	810	878	0	770	0
683	109.90677	1.36	108.899	25540	0	24854	23598	24748	0	21826	22216	21014	0	9886	9674	16052	15342	15386	9204	9184	7988	0	0	0	0	530	612	0	0	0	29526	27148	0	0	0	0	0	0	0	5940	5780	5442	5042	4844	5000	6734	6938	5720	0
684	210.03602	1.35	209.029	590	346	0	0	670	384	444	864	924	0	402	0	320	0	0	190	0	424	0	0	0	0	0	0	0	0	0	268	578	344	0	678	566	558	466	578	216	452	0	0	0	0	0	0	0	0
685	145.87457	1.35	144.867	6788	0	0	0	0	0	0	0	4656	0	3398	0	3850	3922	0	3552	0	0	0	0	1418	0	0	0	0	1060	0	3580	2900	2826	3144	2566	2374	1942	1970	2034	18558	17024	17924	17696	17206	16692	18332	17578	16438	4228
686	117.97726	1.36	116.97	0	234	312	250	132	236	138	0	256	0	0	0	92	180	0	140	250	0	0	106	0	0	148	132	0	0	0	0	0	0	360	242	288	384	90	0	208	0	282	0	0	124	0	0	0	0
687	161.96758	1.38	160.96	588	394	310	0	0	0	0	0	324	0	0	320	0	0	294	358	0	0	0	0	0	0	0	0	0	0	0	0	526	510	198	428	362	450	184	460	0	0	0	0	0	0	310	0	0	0
688	194.03010	1.39	193.023	2158	0	2180	2698	3028	2648	2802	2998	3740	7940	8852	9064	6466	1794	2006	1792	6862	2844	0	0	0	0	0	0	0	0	0	914	1004	1012	678	0	0	0	0	0	0	0	0	0	0	0	778	632	0	0
689	86.03478	1.36	85.0275	1338	1088	1254	1402	1628	0	0	1886	1732	2846	2694	3052	2092	1956	1472	1776	0	2546	668	0	582	484	666	0	492	392	394	610	0	0	806	572	768	0	902	0	378	602	0	0	0	540	592	552	0	190
690	161.84745	1.4	160.84	17338	12762	11848	0	9612	8412	7674	8210	4910	5622	3834	4020	5136	7780	4598	7550	4060	5976	3914	4344	3286	2016	2842	0	1750	2730	0	15600	10594	0	9094	8786	8914	9056	0	8698	15374	14152	16134	15770	14654	14362	16578	0	0	9136
691	385.15902	1.39	384.152	0	0	0	0	4188	0	0	0	0	31122	28990	28774	41486	42496	42968	27704	27340	23058	0	0	0	0	0	338	0	0	0	5738	0	5466	0	0	5954	7290	5718	8074	0	0	178	0	478	304	392	0	336	0
692	130.02413	1.37	129.017	2556	2898	2742	3576	3608	3578	3160	4008	4280	0	6408	6478	2908	4034	3804	4682	3786	3628	2506	0	0	0	0	0	0	0	530	2096	1576	0	1958	1736	0	2258	2206	2196	1154	0	834	1746	0	0	1294	0	1900	532
693	257.09981	1.36	256.093	2198	2146	1556	2164	2154	2660	2454	2468	2322	13858	11352	13330	14278	15090	14902	10698	11080	9522	856	530	250	0	0	178	0	324	0	2486	3230	2194	3414	3368	3298	2906	2612	3154	1668	1432	1608	1796	1170	1174	1326	1208	1296	0
694	196.05692	1.4	195.05	0	0	0	0	0	0	0	0	0	0	0	0	5024	5130	0	0	0	0	0	0	0	0	0	0	0	0	0	0	1594	0	0	0	0	0	0	0	0	1372	0	0	0	0	0	0	0	0
695	261.03016	1.36	260.023	0	0	0	0	0	0	0	112	0	0	0	0	288	0	0	0	752	0	0	0	0	0	0	0	0	0	0	974	0	0	0	0	0	0	0	306	0	0	178	232	0	0	280	0	446	0
696	499.20103	1.37	498.194	0	194	0	0	0	0	216	0	0	0	350	538	0	228	208	0	0	0	0	0	0	0	0	0	0	0	0	0	0	0	0	0	0	0	0	0	0	0	0	0	0	0	0	0	0	0
697	328.13572	1.37	327.128	0	0	0	0	1422	1504	0	1702	0	1784	1678	2002	2408	2494	0	1744	1784	0	0	0	0	0	0	0	0	0	0	0	0	692	0	0	1314	1410	0	1304	554	0	274	462	246	0	538	498	318	0
698	371.14286	1.39	370.136	0	0	124	104	192	0	0	182	0	1500	0	1520	696	686	0	918	1030	0	0	0	0	0	0	0	0	0	0	0	0	0	0	0	0	0	0	0	0	0	0	0	0	0	0	0	0	0
699	267.81043	1.37	266.803	362	0	0	0	0	0	0	0	0	0	0	0	0	0	0	0	0	0	150	0	0	912	1076	878	596	654	736	0	0	0	0	0	0	0	0	0	0	0	0	0	0	0	1814	0	0	22166
700	151.89146	1.4	150.884	1264	1410	1080	1298	1100	1464	0	1426	1052	138	2078	1856	0	0	0	0	816	470	928	116	504	884	174	0	0	0	244	0	950	1074	1126	0	998	1226	1246	1218	3822	3078	3236	2390	2094	1618	2862	2328	520	8848
701	209.85115	1.42	208.844	414	274	364	486	392	320	374	480	406	0	214	218	142	0	0	0	0	0	0	0	0	0	0	0	0	196	0	0	0	0	0	0	0	0	0	0	0	0	0	0	0	0	0	0	0	10074
702	245.97693	1.4	244.97	0	170	0	272	0	0	0	0	0	0	0	0	198	0	0	0	0	0	140	0	226	0	0	0	0	0	0	0	0	0	0	292	0	0	0	0	0	0	0	0	0	0	0	0	0	0
703	230.00263	1.4	228.995	0	0	0	0	0	0	0	0	0	0	0	0	0	0	0	0	0	0	0	0	0	0	0	0	0	0	0	0	0	0	0	0	0	0	0	0	0	0	308	0	0	0	0	0	0	0
704	142.02196	1.38	141.015	112	178	240	352	202	248	526	450	0	0	0	0	240	0	0	0	0	0	0	384	0	0	338	742	592	0	558	372	0	160	228	332	318	254	0	396	292	324	226	446	412	378	290	274	402	264
705	241.99046	1.38	240.983	0	0	0	0	0	0	0	0	0	0	510	0	0	0	0	0	0	0	358	268	0	0	0	0	0	0	198	0	0	0	0	0	0	0	0	0	0	0	0	0	0	0	0	0	0	0
706	159.98386	1.39	158.977	0	0	0	0	136	0	0	0	0	0	0	0	0	0	0	0	0	0	0	0	0	0	0	0	0	0	0	0	0	0	0	0	0	0	0	0	0	0	0	0	0	0	130	0	0	0
707	289.99276	1.38	288.985	0	0	0	0	0	0	0	0	0	0	0	0	0	0	0	0	0	0	0	0	194	0	0	0	1258	1368	1058	0	236	250	0	0	0	0	0	0	0	0	0	0	0	222	0	0	0	0
708	480.11420	1.41	479.107	0	0	162	0	0	0	0	0	0	0	0	0	0	0	0	0	0	0	0	0	0	0	0	0	0	0	606	0	0	0	0	0	0	0	0	0	0	0	0	0	0	0	262	0	0	0
709	173.83661	1.4	172.829	0	0	0	0	1168	0	0	0	2876	0	0	0	0	0	0	4716	0	0	0	0	3490	0	0	0	0	0	0	0	2342	1382	3366	0	0	0	0	1622	0	3244	0	0	0	1836	8988	0	7596	0
710	146.01961	1.39	145.012	376	294	480	472	788	630	1260	0	712	440	328	496	392	294	694	594	0	470	1310	1090	1116	820	0	816	818	638	812	224	220	228	202	538	430	318	406	326	0	498	288	0	278	288	0	0	398	0
711	134.01926	1.4	133.012	15060	15988	17478	19940	20944	20656	22516	20004	20566	17150	14360	16936	14146	13226	14858	15980	15978	14926	20160	13090	7666	5310	5998	2820	4630	5006	4922	0	36152	36416	43948	45226	44982	36512	34414	35556	9150	7404	6842	8494	7742	7276	5794	5240	5072	5286
712	770.31214	1.42	769.305	0	0	0	0	0	0	0	0	0	0	0	0	326	0	0	272	572	798	0	0	0	0	0	0	0	0	0	0	0	0	0	0	0	0	0	0	0	0	0	0	0	238	0	0	0	0
713	192.02516	1.47	191.018	0	0	0	0	0	0	0	0	0	0	0	0	0	0	0	0	0	0	3552	1618	26312	25028	25876	25098	24474	25014	25518	23278	0	0	44036	0	39004	33190	30666	32938	0	0	0	0	960	0	29278	27968	0	1812
714	171.83852	1.43	170.831	0	2690	2940	0	1190	0	0	0	0	0	0	0	0	488	3344	0	720	3806	0	0	0	0	0	0	3710	0	0	728	1288	2786	2424	0	1546	0	1218	1752	2936	3162	4196	2876	3412	5050	0	0	10268	0
715	169.84198	1.44	168.835	0	0	0	0	0	0	0	0	0	0	430	0	0	1330	0	1796	0	2598	1756	0	0	0	0	0	2140	0	2704	0	0	0	0	0	0	0	0	0	0	0	0	0	2390	1640	4702	0	3370	0
716	112.01375	1.46	111.006	0	0	0	7426	7564	0	0	0	0	0	0	0	0	0	0	0	0	0	0	0	2348	3308	2850	3796	3686	3432	2592	3706	2862	2618	2778	5420	5486	4572	5174	4634	0	0	3502	2546	3136	3526	2722	2562	3310	468
717	421.13587	1.44	420.129	4708	5598	5898	6268	6378	5724	7088	7070	6742	21846	20186	19942	30602	30056	32068	18818	19162	18338	284	0	0	0	212	0	0	0	232	3850	4692	4424	6966	7246	7286	5598	5536	5814	0	728	0	138	228	428	348	388	0	156
718	406.02533	1.45	405.018	0	0	0	0	0	0	398	0	0	0	0	0	0	0	0	0	0	0	0	0	402	0	0	0	0	0	0	0	0	0	430	0	450	0	0	0	0	0	0	0	0	0	590	0	434	0
719	162.05044	1.51	161.043	1242	1860	1548	0	1920	1380	1608	1216	1604	1324	1256	1340	1936	1490	1532	1518	1500	1368	2050	1770	1608	0	1444	614	1296	1270	0	0	1086	1262	1176	1160	1912	1334	1356	1254	3108	3022	2620	2332	2782	2386	2154	2252	1846	418
720	450.15660	1.51	449.149	0	0	146	0	0	0	184	244	0	0	0	0	298	312	0	392	456	324	0	0	0	0	0	0	0	0	0	0	0	0	0	0	0	0	0	0	0	0	0	0	260	0	0	0	0	0
721	318.06137	1.46	317.054	0	0	0	0	0	0	15838	0	0	0	0	0	0	0	0	0	0	0	0	108752	104840	91438	91672	88608	74178	70736	69478	0	8814	0	11312	0	0	9412	0	0	0	0	0	0	0	0	0	0	0	4002
722	319.06470	1.47	318.057	2232	1962	2228	2084	2550	2202	2014	2720	2034	8584	8622	7596	5318	4736	4728	0	6830	0	12214	12504	11668	10786	11550	10818	7268	8682	8852	1700	1304	0	1924	1910	2282	0	2346	1668	3312	3796	4436	0	4684	4122	4946	5010	6108	838
723	318.33747	1.49	317.33	0	0	0	0	0	0	0	0	0	0	0	0	0	0	0	0	0	0	0	0	0	0	0	0	440	0	622	0	0	130	0	0	0	0	0	0	0	0	0	388	0	0	0	0	0	0
724	268.07857	1.49	267.071	0	0	0	0	0	0	0	0	0	0	0	0	0	0	0	0	0	0	0	928	0	0	0	0	0	0	0	2148	2764	0	3022	0	3026	2622	0	0	0	0	0	3112	2960	0	0	0	2086	0
725	320.06058	1.47	319.053	1868	0	0	1298	0	1814	1302	2038	0	4710	4286	5448	2906	2592	2912	5314	4214	4488	6820	7786	7520	6318	6538	5330	5140	5068	5410	0	1330	540	1512	0	0	0	0	0	3098	2490	0	2692	2614	4528	2110	1984	1828	468
726	196.81682	1.47	195.81	9256	6620	0	2612	4508	5366	4406	3170	4424	11434	8482	10276	6348	7402	6986	6150	6076	5580	2450	2506	2134	2114	1656	1592	0	0	2368	0	8504	2752	7856	0	4484	0	6058	0	10900	0	2262	2852	0	7924	5122	5802	5374	4108
727	125.99601	1.48	124.989	0	1380	1294	0	1484	0	1652	1686	0	3552	3076	3042	1866	1866	2468	1894	1766	1732	0	0	0	0	0	0	0	1722	1814	0	1354	1170	1402	1422	1262	0	0	1314	0	0	0	0	0	522	0	0	0	0
728	637.13894	1.47	317.562	0	0	0	0	0	0	0	0	0	0	0	0	0	0	0	90	0	0	84	104	0	0	0	0	0	0	0	0	0	0	0	0	0	0	0	0	0	0	0	0	0	0	0	0	0	0
729	199.01366	1.49	198.006	436	0	338	560	654	0	816	0	0	1666	1892	1452	1362	1752	1350	2042	1838	0	0	0	0	0	0	0	0	0	0	746	844	1006	942	1088	812	792	822	814	0	0	0	0	0	0	0	0	0	0
730	318.74866	1.49	317.741	0	0	0	0	0	0	0	0	0	0	0	0	0	0	0	0	0	0	0	0	0	0	0	0	0	0	0	0	0	0	0	0	0	0	0	0	92	0	0	0	0	0	0	0	0	0
731	278.09932	1.5	277.092	5922	6256	0	0	6232	0	6140	0	5526	5278	4902	6148	7646	6126	5254	15314	15840	14678	0	0	0	0	0	468	0	496	500	0	1888	1988	2060	0	0	1936	0	2258	0	0	0	0	0	0	0	0	0	0
732	318.19730	1.5	317.19	0	0	0	0	0	0	0	0	0	0	0	0	0	0	0	1092	0	0	0	0	0	0	1340	0	0	0	0	0	0	0	0	0	0	0	0	0	0	0	0	0	0	0	628	0	0	0
733	318.29267	1.49	317.285	0	0	0	0	0	0	0	0	0	0	0	0	0	0	0	0	0	0	0	0	0	0	0	0	0	0	0	0	0	0	0	0	0	0	0	0	0	0	0	0	0	0	0	0	0	0
734	222.03637	1.5	221.029	0	0	0	0	0	0	0	0	0	0	0	0	0	0	0	0	0	0	0	0	0	0	0	0	1598	0	0	0	0	0	0	0	0	0	0	0	0	0	0	0	0	0	0	0	0	0
735	567.23597	1.46	566.229	0	0	0	0	0	0	0	0	70	0	0	0	0	0	0	0	0	0	0	0	0	0	0	0	0	0	0	0	0	0	0	0	0	0	0	0	0	0	0	0	0	0	0	0	0	0
736	93.93252	1.5	92.9253	0	0	0	0	0	0	0	0	0	0	0	3258	5914	0	0	9862	0	4310	0	0	0	0	0	0	0	0	0	0	10222	0	9534	9100	0	0	0	11722	4086	4484	4302	3316	3112	3234	0	0	4262	0
737	327.76580	1.53	326.759	0	0	0	0	0	0	0	0	0	74	0	0	0	0	0	0	0	0	0	0	0	0	116	0	0	0	0	298	0	0	0	0	0	0	0	0	0	0	0	170	0	218	216	0	256	8236
738	166.04545	1.58	165.038	4050	3038	3250	3424	3868	4056	4206	4336	3466	0	0	0	1050	0	0	0	0	0	1778	554	0	520	342	204	338	368	512	3096	4722	3594	3908	4056	4578	3864	4482	4240	648	258	296	1240	272	0	324	380	0	102
739	206.04095	1.56	205.034	1524	1338	1664	1732	0	1728	2142	2050	2296	868	1018	1030	1508	0	1596	2106	1770	1948	2934	2926	2176	1594	1562	1588	1664	1880	1730	740	0	820	926	734	912	748	1070	710	394	378	156	660	0	298	368	0	520	614
740	196.05643	1.58	195.049	0	1386	0	0	0	0	0	1614	0	0	0	0	0	0	0	0	0	0	0	1638	1074	406	0	0	0	0	0	0	1734	1352	2444	0	1452	2314	0	1412	0	0	370	0	0	1234	0	0	418	0
741	118.02433	1.59	117.017	2462	1924	1840	2652	2268	2458	2168	2162	2460	0	1142	1290	1914	0	2522	2912	2294	3402	0	0	0	0	924	0	2428	2074	0	3490	2552	2668	2994	2638	2822	3590	2736	2628	0	1018	0	0	0	0	1162	3558	1378	896
742	136.03480	1.57	135.028	0	6216	0	6280	0	6066	0	5516	6404	0	0	0	1492	0	0	0	0	2084	0	4504	1764	1294	2770	2134	2926	1374	1358	6136	7298	0	0	7168	0	7014	6554	7232	0	458	0	2152	0	0	0	0	0	366
743	703.22730	1.6	702.22	212	0	0	0	196	0	0	180	0	0	0	2942	0	0	0	0	0	0	0	0	246	0	0	0	0	0	0	0	0	0	0	0	0	0	0	0	0	0	0	0	0	0	0	0	0	0
744	356.09533	1.55	355.088	0	628	636	428	910	598	0	842	0	5044	1768	4128	1722	1666	1354	1594	1360	1976	460	0	0	0	0	0	0	362	0	0	0	310	244	0	0	0	0	0	0	0	378	0	284	268	454	0	244	0
745	74.03604	1.59	73.0288	0	0	3030	1090	0	0	808	834	0	0	0	0	0	654	0	0	0	1228	568	0	2480	342	266	0	0	480	334	0	0	0	0	1128	1532	0	1032	1172	344	0	346	548	258	422	0	450	0	198
746	116.00894	1.57	115.002	3622	1080	3524	4054	4736	5294	4984	3776	5014	3980	3228	3736	3278	2826	3814	4234	3304	3362	4644	3130	1292	1410	1352	1324	1534	1582	1758	5156	7300	7402	8908	8922	1820	1170	1644	0	1912	1590	1560	1596	1896	1796	1400	1504	1482	270
747	90.02988	1.6	89.0226	1472	0	1066	1130	0	1414	0	0	0	0	0	0	0	0	0	0	0	540	0	652	0	426	0	0	0	0	718	1158	0	3308	1662	0	1500	0	0	1256	0	0	0	0	850	886	0	902	570	0
748	180.06155	1.59	179.054	0	0	0	318	406	0	0	0	0	0	0	0	202	348	286	0	0	0	360	0	0	0	0	0	0	0	0	400	0	1494	248	380	290	324	300	228	0	0	0	144	526	286	0	0	0	0
749	218.05472	1.55	217.047	0	0	0	0	0	0	0	0	0	0	0	0	0	0	0	0	0	0	0	0	0	0	0	0	0	0	0	0	0	0	0	0	0	0	0	0	0	4052	4028	3952	0	4472	5164	4304	5546	0
750	164.03003	1.56	163.023	1260	1184	1574	1310	1342	1258	1724	1510	1390	456	986	1088	914	732	790	782	970	990	4440	3498	2472	1898	1922	1884	1848	1700	1344	440	482	408	566	852	976	522	656	770	524	672	572	524	368	638	450	212	232	0
751	406.03558	1.57	405.028	2210	0	1820	0	0	0	0	0	0	0	0	0	0	0	3320	0	0	0	0	0	0	0	0	0	0	0	0	0	0	0	0	0	0	0	0	260	0	0	0	0	0	0	0	0	0	0
752	422.01015	1.56	421.003	0	6306	5378	3274	4662	0	4432	0	0	0	0	0	0	0	0	0	0	0	216	560	550	486	604	0	0	500	598	392	0	0	0	0	1062	0	0	0	0	274	0	0	0	0	656	0	0	0
753	262.03497	1.62	261.028	0	1058	0	1488	0	0	1324	1208	0	0	0	0	1218	0	0	1848	1748	1550	0	3506	3132	3678	4080	4482	3974	3490	4762	1666	0	1460	0	0	1794	0	0	1550	912	666	0	0	0	884	0	658	0	0
754	408.01283	1.59	407.006	0	0	0	0	322	0	0	0	0	1930	2396	2706	0	0	0	0	0	0	0	0	0	0	0	0	0	0	0	0	0	0	0	0	246	0	0	0	0	0	0	0	0	0	0	0	0	0
755	662.18899	1.61	661.182	0	0	0	0	0	0	0	0	0	480	0	0	0	0	0	0	0	0	0	0	0	0	0	0	0	0	0	0	0	0	0	0	0	0	0	0	0	0	0	0	0	0	0	0	0	0
756	130.02412	1.61	129.017	2822	3112	2988	5472	4468	0	5124	6312	0	0	0	8050	4796	4036	4014	5714	5160	0	0	0	0	0	0	0	0	0	0	0	1510	0	1906	2006	0	1844	1610	0	0	0	0	0	0	0	0	0	0	0
757	156.00666	1.58	154.999	0	0	6302	5532	0	6048	6366	7268	6854	2840	2962	2648	3982	3854	4782	5286	5336	5726	0	0	0	0	0	0	0	0	0	0	0	0	8880	9826	0	10562	0	0	1892	0	1682	1808	1990	1506	1586	2214	1242	0
758	548.04053	1.61	547.033	1960	2148	1608	0	1960	0	2546	2772	0	0	0	0	4652	0	8102	0	0	0	0	0	0	0	0	0	0	0	0	0	0	0	0	0	0	0	0	0	0	0	0	1586	534	0	0	0	0	0
759	109.90669	1.62	108.899	0	23890	0	0	23702	24132	0	0	0	3574	4596	0	10082	10516	11224	6206	6670	5898	0	0	704	484	0	0	414	400	328	0	0	27512	0	0	27260	0	30664	30100	4792	5466	5516	5080	5208	5240	6440	6742	6876	994
760	161.84816	1.62	160.841	0	6684	5990	6444	3936	5062	4670	3688	3360	2942	3150	4250	0	3390	3680	3430	4116	3336	3368	1596	1966	0	0	0	1572	1786	1210	0	0	0	7870	0	9040	9454	9142	9426	0	15310	0	0	0	0	0	0	0	4340
761	267.81026	1.63	266.803	444	0	0	0	0	0	0	0	0	0	0	0	96	0	0	0	0	0	0	0	0	0	0	0	0	0	0	674	0	0	0	0	0	0	0	0	0	0	0	0	0	0	0	0	0	32268
762	261.02939	1.67	260.022	0	282	270	224	0	0	190	226	0	0	0	0	0	0	0	0	0	0	2760	0	0	0	0	0	41230	40278	42238	0	0	398	0	784	0	0	0	0	0	256	214	352	312	0	0	222	0	0
763	174.01455	1.65	173.007	4674	0	5168	0	0	0	0	0	0	0	0	0	0	9270	0	0	0	0	0	0	0	0	0	0	0	0	0	0	0	0	1454	0	0	0	0	0	0	0	0	0	0	0	0	0	0	0
764	770.31320	1.68	769.306	212	0	0	0	0	0	0	0	0	0	0	0	1954	1672	1744	898	146	482	0	0	0	0	0	0	0	0	0	0	0	0	0	0	0	0	0	0	0	70	0	0	0	0	0	0	0	0
765	371.14389	1.66	370.137	0	172	0	0	0	0	0	132	0	0	1508	352	140	106	710	70	0	932	0	0	0	0	0	0	0	0	0	0	0	0	0	0	0	0	0	0	0	0	0	0	0	0	106	0	0	0
766	499.20248	1.69	498.195	0	0	0	0	0	0	132	0	0	400	0	0	0	0	0	0	0	0	0	0	0	0	0	0	0	0	0	0	0	0	0	0	0	0	0	0	0	0	0	0	0	0	0	0	0	0
767	385.15903	1.66	384.152	7092	7110	7506	8942	9106	9246	8626	8932	7858	0	0	0	2928	0	0	0	0	0	192	0	0	0	246	0	0	0	0	5398	6168	6132	9030	9580	8940	0	7726	0	588	456	582	542	0	0	270	480	390	222
768	268.07875	1.65	267.071	6106	6102	6400	0	7014	0	5994	566	0	388	0	0	0	458	0	0	1676	0	0	0	430	0	0	0	0	0	0	148	284	2818	304	3044	242	0	0	330	2516	0	0	2664	0	0	0	382	576	0
769	328.13761	1.69	327.13	1476	1336	1406	1356	0	1426	1494	0	1602	212	170	0	302	2208	2480	1456	1704	1836	0	0	0	214	0	0	0	0	0	1194	1278	1304	1958	1732	1914	188	1164	0	238	616	592	0	0	0	0	628	424	0
770	318.06183	1.66	317.055	0	0	0	0	0	0	0	0	0	0	0	0	0	0	0	0	0	0	113916	0	0	0	0	0	0	0	0	0	0	0	0	0	0	0	0	0	0	0	0	0	0	0	0	0	0	4028
771	181.83242	1.68	180.825	0	0	0	0	0	0	0	0	0	0	0	0	0	0	0	0	0	0	0	0	0	0	0	0	0	0	0	0	0	0	0	0	0	0	0	0	0	0	0	0	0	0	0	0	0	0
772	182.07752	1.69	181.07	3810	3970	4010	4634	4228	4700	3854	3560	3630	0	2064	0	2916	1962	2606	2900	0	3186	358	0	0	0	0	0	0	398	0	5268	6222	5728	6540	6030	6516	6962	7410	0	0	0	0	0	0	0	0	0	0	0
773	222.03640	1.69	221.029	0	0	0	0	0	0	0	0	0	0	0	0	0	0	0	0	0	0	0	0	1878	1520	0	1710	7114	7260	6904	0	0	0	0	0	0	0	0	0	0	0	0	0	0	0	0	0	0	0
774	443.98907	1.7	442.982	3186	3248	2582	4596	3794	4224	6118	5164	5634	10252	9744	9584	7892	7636	8218	9486	9708	9272	0	0	0	0	0	0	0	0	0	0	0	0	796	382	0	0	0	0	0	0	720	0	0	0	0	0	0	0
775	134.01937	1.71	133.012	3038	0	3450	2492	3150	2578	2402	2240	2948	1516	0	0	0	0	0	0	0	0	0	0	0	0	0	0	1550	1458	0	2966	4156	3058	3200	3444	3648	0	3610	0	1112	0	1380	0	0	0	0	0	0	0
776	93.93287	1.71	92.9256	0	0	0	0	12616	0	0	12104	9684	2394	2346	2184	4964	3872	4960	3664	4476	3484	0	0	0	248	260	0	0	386	330	8302	9948	8360	8598	8582	8704	9088	10154	10486	3212	3306	3284	2514	2972	2740	2988	3458	3812	0
777	567.23717	1.72	566.23	0	0	0	0	0	0	0	0	0	0	0	0	0	0	0	0	0	0	0	0	0	0	0	0	0	124	0	0	0	0	0	0	0	0	0	0	62	0	0	0	0	0	0	0	0	0
778	450.15784	1.73	449.151	0	0	0	130	0	0	0	0	0	0	0	0	0	0	0	0	0	202	0	0	0	0	0	0	0	0	0	0	0	0	0	0	0	0	194	0	0	0	0	0	0	0	0	0	0	0
779	663.25694	1.72	662.25	0	0	142	0	0	0	0	0	0	0	0	0	0	0	0	432	0	0	0	0	0	0	0	0	0	0	0	0	0	0	0	0	0	0	0	0	0	0	0	0	0	0	0	0	0	68
780	278.09924	1.74	277.092	5642	540	6076	5842	358	5964	722	5670	582	0	0	4858	632	7092	6796	1184	0	0	0	558	0	0	0	390	0	0	0	1726	542	142	864	2030	2328	2392	2322	2442	684	272	0	0	228	0	0	0	0	0
781	162.05082	1.72	161.044	0	0	1142	1502	1132	1602	1266	1334	1072	316	0	322	514	0	0	474	0	0	0	500	1596	436	366	226	0	394	260	0	422	682	488	498	0	0	0	0	618	696	0	334	2048	622	526	670	392	0
782	289.99366	1.72	288.986	0	0	0	0	0	0	0	0	0	0	710	1192	646	0	0	440	822	0	0	0	208	1050	1168	1106	1598	1384	1396	0	0	0	0	0	0	0	0	0	0	332	290	0	270	428	358	0	190	0
783	196.81715	1.72	195.81	10772	6664	5808	4820	5450	4554	4308	4534	4280	8274	10540	7932	6832	0	6320	5688	5274	5478	2424	2876	2264	1618	0	1726	2200	4052	3310	15498	12484	8474	10560	10262	8198	8002	7538	0	11936	11330	10902	10294	10292	0	7206	6476	6550	3722
784	320.00248	1.72	318.995	0	0	0	0	0	0	0	0	0	0	0	0	0	0	0	0	0	0	0	0	0	0	0	3070	0	2790	2520	0	0	0	0	0	0	0	0	0	0	0	0	0	0	0	0	0	0	0
785	209.85230	1.74	208.845	304	0	196	188	376	232	294	0	130	0	0	0	0	144	0	116	128	140	0	0	76	0	0	0	0	0	0	0	308	0	0	0	0	0	0	0	0	0	0	0	0	0	0	0	0	7594
786	327.76634	1.73	326.759	0	0	0	0	0	0	0	0	0	0	0	0	0	0	0	0	0	0	0	0	0	0	0	0	0	0	0	0	0	0	0	0	68	0	0	0	0	0	0	0	0	48	0	0	0	7984
787	517.07424	1.73	516.067	0	0	0	0	0	0	0	0	0	276	0	256	0	0	0	222	0	0	0	0	0	0	0	0	0	0	0	0	0	0	0	0	0	0	0	0	0	0	0	0	0	0	0	0	0	0
788	192.02514	1.74	191.018	150072	140140	133838	166704	167872	170032	202706	207136	203822	602018	523800	565576	355306	349212	359706	453890	471638	473946	5328	28822	0	0	0	0	0	12406	0	8476	29784	30660	0	40880	0	0	0	0	44772	45328	49266	23236	22442	22234	0	0	29824	0
789	112.01383	1.74	111.007	18044	19216	17442	21328	21504	20720	25672	25598	27498	81650	77124	79026	50202	44136	44150	58900	60462	65300	4026	4644	2196	1560	0	2058	1680	1604	2014	1786	2148	3738	3402	5270	2458	0	2028	2258	6200	6442	6588	3684	0	3744	4402	2156	4918	306
790	257.09981	1.75	256.093	0	0	0	0	0	0	0	0	0	0	424	0	0	0	0	0	0	0	356	0	0	0	0	0	0	0	0	178	384	2376	3418	294	234	0	2518	0	296	0	0	0	0	0	0	0	0	0
791	318.33614	1.76	317.329	0	0	0	0	0	0	0	0	0	0	418	0	0	0	0	0	0	0	0	0	0	0	0	0	0	0	0	0	0	0	0	214	136	0	0	0	0	0	0	0	0	0	0	0	0	0
792	218.05505	1.76	217.048	0	0	0	0	0	0	0	0	0	0	0	0	0	0	0	0	0	0	0	0	0	0	0	0	0	0	0	0	0	0	0	0	0	0	0	0	3872	4454	4262	3632	3838	3836	4976	3874	4942	0
793	445.64991	1.76	444.643	0	0	0	0	0	0	0	0	0	0	0	0	74	0	0	0	0	0	0	0	0	0	0	0	0	0	0	0	0	0	0	0	0	0	0	0	0	0	0	0	0	0	0	0	0	0
794	183.05525	1.8	182.048	0	302	0	0	0	0	0	330	0	1316	1418	0	2818	2302	2728	2536	2428	2904	0	696	732	314	0	0	222	0	0	0	0	0	748	378	418	410	586	0	0	0	1090	1176	1020	956	1146	1054	1126	0
795	318.74827	1.79	317.741	0	0	0	0	0	0	0	0	0	0	0	0	0	0	0	0	0	0	0	0	0	0	0	0	0	0	0	0	0	0	0	0	0	0	0	0	0	0	0	0	0	0	0	0	0	0
796	156.00672	1.81	154.999	6890	9866	10048	9944	0	0	0	9040	7862	3140	3476	2882	4416	4052	5230	0	8768	0	0	0	0	0	0	0	0	0	0	13406	0	0	0	0	15100	12612	14084	14450	1872	1898	2140	1732	1974	1844	1964	2102	2012	340
797	704.20512	1.8	703.198	0	0	0	0	0	0	0	0	0	338	0	0	0	526	0	374	354	0	0	0	0	0	0	0	0	0	0	0	0	0	0	0	0	0	0	0	0	0	0	0	0	0	0	0	0	0
798	262.03534	1.79	261.028	0	1096	1500	1128	1346	1548	1390	1610	1372	1988	1796	1402	1380	0	0	1740	2296	2118	2920	2654	4516	5616	5536	5356	4736	5418	2476	1810	1874	1894	2050	0	1930	0	0	2218	0	1250	1282	0	1080	1230	1114	1190	0	0
799	422.00872	1.77	421.001	5786	6064	5062	7566	7372	8260	10174	10930	11372	51202	41898	46578	26590	27146	26176	32606	33518	32480	0	0	468	0	0	530	0	630	682	0	116	566	872	984	262	664	454	0	1656	1416	1644	736	470	722	762	718	880	0
800	406.03507	1.77	405.028	3040	2908	3342	3880	3916	3984	6230	6172	6074	37960	29172	34134	12802	13880	13974	24854	26584	24618	0	0	0	0	0	284	0	0	0	0	0	320	0	446	0	0	0	398	830	1098	858	0	0	0	0	0	340	0
801	391.99477	1.79	390.987	3768	5350	4252	4550	3992	3634	3740	5874	3058	4032	4722	4352	7240	7018	5946	6266	0	4860	1232	1110	1022	0	596	586	382	354	500	3044	3672	4086	4038	4098	4892	4546	4244	4380	4398	3566	4160	5536	4440	4646	5128	5034	5026	0
802	199.01381	1.77	198.007	0	780	804	824	730	954	0	834	736	1624	1946	1860	1536	1628	1916	1880	2008	2274	0	0	0	120	0	0	0	0	230	0	0	574	0	0	0	588	0	1116	176	0	0	0	0	0	0	0	0	0
803	320.06052	1.81	319.053	2146	2100	2418	2200	2514	1876	2114	3016	2196	6306	9686	7118	4024	5002	5936	5984	6796	6078	8056	0	3676	3268	2960	2816	3208	2626	3120	0	0	1470	1494	1538	1810	1464	1324	1696	3932	3572	3762	4284	4450	3760	3654	3840	4372	0
804	637.13688	1.78	317.561	0	0	0	0	0	0	0	0	0	0	140	0	0	0	0	0	0	92	86	88	0	0	0	0	0	0	0	0	0	0	0	0	0	0	0	0	0	0	0	68	0	0	0	0	74	0
805	319.06422	1.8	318.057	2994	3122	3074	2750	2970	3904	2562	2650	3386	16920	16614	16800	7600	0	7250	0	0	10384	10870	0	0	7846	5276	4622	5056	3022	3750	2280	2158	2406	2432	2644	2790	2094	2092	3052	7554	6310	6446	7030	7290	7314	6338	5920	6434	600
806	480.11337	1.84	479.106	0	0	0	0	0	0	0	0	0	270	0	0	0	0	0	0	0	0	0	0	0	0	0	618	0	0	0	0	0	0	0	0	0	0	0	0	0	164	0	194	0	0	0	0	0	0
807	381.72106	1.81	380.714	0	0	0	0	0	0	0	0	0	0	0	0	0	0	0	0	0	0	0	0	0	100	0	276	0	0	0	0	0	0	0	208	0	0	204	0	0	0	0	0	0	0	114	0	180	0
808	318.06136	1.83	317.054	0	0	0	0	0	0	28480	0	0	0	0	0	0	0	0	0	0	0	0	0	0	0	0	0	0	0	0	16500	18140	18110	19730	20996	20364	18124	19068	20570	0	50254	53806	61368	60942	55256	49658	50848	53596	3006
809	182.07768	1.84	181.07	3528	3922	3612	4512	4004	3892	3428	3312	3896	2174	2228	1972	2428	2276	2398	2472	3292	2708	410	370	424	248	0	224	362	436	314	5008	5526	5832	6094	7326	6928	6692	6738	6998	0	700	0	786	0	0	0	440	0	108
810	532.06830	1.83	531.061	914	0	0	0	0	1292	1494	730	1620	12576	0	0	4350	4120	4066	9232	0	9146	0	1230	952	0	0	0	0	0	0	0	0	0	0	0	0	0	0	0	0	1488	1154	0	0	822	0	350	664	0
811	548.04264	1.86	547.035	1900	2100	1932	2354	1898	2540	2484	2736	2332	18332	17428	18098	9796	9340	9710	14248	15382	13280	0	0	0	0	0	0	0	0	0	0	390	0	0	674	768	0	0	0	1942	2008	2026	750	1222	1156	1432	1054	476	0
812	164.03022	1.85	163.023	0	0	690	0	0	0	640	0	0	184	286	332	0	518	398	482	164	370	0	1184	288	186	320	384	524	412	432	490	488	368	464	0	194	190	326	346	186	374	182	242	294	302	0	166	196	0
813	161.96785	1.86	160.961	0	626	250	764	760	638	642	814	724	0	174	0	0	202	0	0	0	0	0	0	0	0	0	0	0	0	0	340	0	218	346	144	362	380	308	192	0	0	210	0	0	0	200	0	0	0
814	109.90680	1.86	108.9	0	0	0	0	0	0	0	0	0	3134	4322	3376	10370	10056	10864	5628	5864	5730	0	0	0	424	286	290	0	0	0	0	0	0	27168	26660	0	30322	0	0	4906	4128	5410	4324	4706	4586	6080	6304	6094	0
815	318.29171	1.84	317.284	0	0	0	0	0	0	364	356	0	0	0	0	0	0	0	0	0	0	0	0	0	0	0	0	0	0	0	0	0	0	0	0	0	0	0	0	0	0	0	0	0	0	0	0	0	0
816	130.02432	1.84	129.017	3730	4762	4500	5804	5496	5820	6118	6874	7582	8232	7774	7820	4836	5326	4758	6216	5348	6994	0	1170	0	532	0	0	0	0	0	1394	1386	1398	1612	1852	1854	1818	1898	1804	0	1372	1320	1204	1394	0	1722	0	1374	0
817	474.07108	1.86	473.064	324	0	0	0	0	0	0	0	0	0	0	268	0	0	0	0	326	0	5740	4532	2908	0	0	1484	786	0	1104	0	0	0	0	0	208	0	0	0	0	0	0	0	0	0	0	0	0	0
818	636.11848	1.9	635.111	284	0	266	332	0	136	0	298	346	4220	2712	2936	0	1804	0	3372	3958	2314	3680	3210	0	328	0	0	716	0	500	0	0	0	0	0	0	0	0	0	816	962	0	880	1118	940	762	0	766	0
819	174.01471	1.85	173.007	5534	5166	5482	6624	0	7290	8194	6506	8558	17506	16024	15904	10056	10680	9928	13364	13222	13974	0	1204	1406	0	364	420	566	0	0	0	0	1120	1346	1744	1682	1560	1354	0	1824	1644	1428	710	1014	862	1012	984	1186	0
820	318.19696	1.85	317.19	0	0	0	0	0	0	0	0	0	0	1534	1396	0	0	0	1414	0	1282	0	1082	0	0	0	0	0	0	0	0	0	0	0	0	0	0	0	0	0	0	0	0	0	0	0	0	0	0
821	93.93256	1.87	92.9253	0	0	0	0	0	0	0	0	0	0	2024	0	4012	3630	0	3252	2480	3378	0	0	0	0	0	0	0	0	0	0	5512	8358	0	0	0	0	8852	0	2892	0	2592	1822	0	0	2878	3020	2974	0
822	320.00444	1.9	318.997	0	0	0	0	0	0	0	0	0	0	0	0	0	0	0	0	0	0	0	0	0	3196	2072	2566	2926	2654	3142	0	0	0	0	0	0	0	0	0	0	0	0	0	0	0	0	0	0	0
823	196.81729	1.92	195.81	8162	0	5700	4890	5268	0	4368	4582	0	7370	6888	6936	7130	0	0	5834	4670	4966	0	2528	0	0	2182	2352	2816	0	3070	10430	0	11552	7596	7960	10210	10146	10046	0	8424	0	8758	7542	7366	0	6124	0	5452	3404
824	206.04127	1.9	205.034	1308	1436	1624	1646	1970	1874	1818	2006	1758	0	0	0	0	1204	1252	1758	1752	1560	1292	0	0	598	0	472	0	0	282	296	600	398	516	0	494	382	0	482	0	272	506	144	464	320	176	328	264	218
825	142.02263	1.92	141.015	0	274	320	318	456	492	194	226	340	0	0	0	0	0	0	322	280	0	828	632	668	946	866	886	724	454	1272	0	0	0	296	254	160	270	0	234	578	390	376	446	634	486	266	500	484	0
826	261.02985	1.92	260.023	208	0	342	128	200	222	390	320	256	0	908	0	1020	0	0	1042	0	1336	0	0	47896	46892	45086	47258	0	0	0	0	918	900	0	892	0	932	870	742	0	176	488	342	520	0	346	170	174	0
827	517.07521	1.9	516.068	0	0	0	0	0	0	0	0	0	420	304	424	0	0	0	234	438	456	0	0	0	0	0	0	0	0	0	0	0	0	0	0	0	0	0	0	0	0	0	0	0	0	0	132	0	0
828	86.03445	1.93	85.0272	2042	2182	2034	2992	3278	2968	2912	3144	2722	2546	2886	2862	2600	1938	2206	2126	2316	2208	420	0	364	368	68	0	222	384	0	536	846	0	0	828	630	970	850	838	0	598	550	308	0	316	0	0	284	0
829	356.09502	1.92	355.088	302	0	0	0	0	0	0	0	0	1790	278	0	330	346	0	428	304	334	396	558	0	0	0	0	0	0	0	0	0	0	0	0	138	0	0	0	0	0	172	170	0	0	0	0	0	0
830	134.01953	1.96	133.012	1868	1934	1958	2572	1972	2204	2382	2296	1954	942	0	970	974	1508	0	1394	0	1192	0	0	1052	1058	0	932	0	0	988	1792	2588	2898	2862	2992	3048	3082	2524	2834	1250	0	0	0	0	0	0	0	0	508
831	222.03661	1.97	221.029	0	0	282	0	0	0	0	0	464	0	0	186	0	0	0	0	290	0	0	2202	4204	3506	6268	6724	6920	6386	0	0	0	0	0	0	0	0	0	0	0	0	0	0	0	0	0	0	0	0
832	217.91526	1.98	216.908	0	0	0	0	138	0	0	0	0	0	0	0	0	0	0	0	0	0	0	136	0	3196	4984	3326	3730	4720	4918	0	0	0	0	0	0	0	0	0	0	0	0	0	0	296	0	0	0	0
833	125.99655	1.97	124.989	1904	1700	1382	1780	1900	1398	1664	2020	1362	2944	3138	3648	2586	2478	2850	2262	2114	2598	0	0	1632	2432	0	2376	1966	1548	0	1660	1540	1672	1792	1650	1654	1332	1598	1498	0	0	716	668	688	0	878	888	1062	0
834	318.33706	1.99	317.33	0	0	0	0	0	0	0	0	0	0	0	0	0	0	0	772	0	0	0	0	0	0	0	0	0	0	0	0	0	0	0	0	0	0	0	0	0	0	0	0	0	0	0	0	0	0
835	97.96533	2.02	96.9581	4898	3066	2854	2092	2848	2394	3282	2836	2380	2248	1868	3222	3406	3288	2964	2378	2504	3120	6496	7218	7230	0	0	0	0	0	0	17536	7636	4942	3980	4320	3742	4080	3068	3044	3042	2538	6244	7286	0	9106	0	0	8218	1876
836	348.03628	2	347.029	0	0	0	0	638	0	410	0	0	458	314	428	0	0	0	392	418	0	0	2480	0	796	0	0	772	832	0	0	0	0	0	0	0	0	0	0	0	0	0	0	0	0	0	0	0	0
837	662.19076	2	661.183	0	0	118	0	0	0	0	0	0	0	0	0	0	0	0	0	0	0	208	0	0	0	0	0	0	0	0	0	0	0	0	0	0	0	0	0	0	0	0	0	0	88	0	0	0	0
838	289.99419	2	288.987	0	0	0	0	0	0	0	0	0	506	734	0	694	600	0	566	0	730	322	196	0	1110	0	0	0	0	0	0	0	0	0	0	0	0	0	0	0	268	0	264	196	0	0	0	236	0
839	271.98276	2.02	270.975	0	0	0	0	0	0	0	0	0	0	0	0	0	0	0	0	0	0	0	0	0	0	0	0	0	170	0	0	0	0	0	302	0	0	0	0	0	0	0	0	0	0	0	0	0	0
840	262.03598	2.01	261.029	0	1772	1460	1704	1824	1876	1572	1706	1852	1734	0	2026	1698	1844	1650	2354	2320	2648	0	4088	6068	5774	5186	4888	2780	2522	2594	1300	1846	1712	1744	2238	1664	0	0	1494	1222	0	1318	1098	1168	0	0	1208	1034	0
841	704.20252	2.04	703.195	0	0	0	0	0	0	0	0	0	0	0	0	0	0	0	0	0	0	0	0	0	0	0	0	0	0	0	0	0	0	0	0	0	0	0	88	0	0	54	0	0	0	0	0	0	62
842	156.00700	2.03	155	10060	0	9558	0	10712	11496	10824	11158	10162	4012	3654	3446	6372	5174	5686	8578	0	9788	0	0	0	0	0	0	0	0	0	0	15408	14746	15860	16030	15332	0	12922	0	2308	1846	2156	1916	1718	0	1954	1936	1494	164
843	381.72000	2.02	380.713	0	0	0	0	0	0	0	0	0	0	0	0	0	0	0	0	0	0	0	0	0	0	0	102	0	0	0	0	0	0	0	0	0	0	0	0	0	0	0	0	0	0	0	0	0	0
844	218.05441	2.03	217.047	0	0	0	0	0	0	0	0	0	13364	13010	12634	0	0	17930	24022	0	23618	0	0	0	0	0	0	0	0	0	0	0	0	0	0	0	0	0	0	3056	3236	3538	3364	3330	3402	4492	3976	3464	222
845	532.06832	2.06	531.061	0	1074	1030	1474	1192	1164	1450	1544	1386	0	11058	11134	4190	3956	4406	9654	9386	8044	0	526	0	0	0	0	0	0	0	0	0	0	0	0	0	0	0	0	0	0	0	0	0	0	0	310	0	0
846	480.11472	2.04	479.107	344	120	0	0	0	0	0	0	0	0	0	0	0	0	168	0	0	0	0	0	0	376	464	484	564	726	0	0	170	0	0	0	120	0	0	0	0	0	0	284	0	0	0	164	0	126
847	247.99798	2.07	246.991	976	0	0	0	9116	9620	11380	6842	6930	0	1436	1494	1578	2508	2272	2080	1950	2438	610	0	13790	0	0	6520	0	6020	10734	1162	2196	6212	4318	2998	2634	1736	1666	1578	1508	1448	0	0	1010	0	0	0	0	468
848	181.83280	2.05	180.826	0	0	0	0	0	0	0	0	0	0	0	0	0	0	0	0	0	0	120	0	0	0	0	0	0	0	0	0	0	0	0	0	0	0	0	0	0	0	0	0	0	0	0	0	0	0
849	312.01787	2.07	311.011	0	0	0	0	0	0	0	0	0	0	0	0	0	0	0	0	0	0	5822	2076	0	0	0	670	1102	572	0	0	0	0	0	0	0	0	0	0	0	0	0	0	0	0	0	0	0	0
850	130.02442	2.08	129.017	6036	5850	5370	7228	7024	7352	7386	7902	6772	4834	5520	4706	3602	3464	3888	3990	6458	4450	0	0	1160	642	464	0	556	734	644	0	1388	1556	1760	1798	1740	1328	1450	1218	1210	1290	1426	1330	1068	720	0	1176	0	182
851	658.09791	2.1	657.091	0	0	0	0	0	0	0	0	0	2580	2250	2398	0	916	0	0	0	0	0	0	0	0	0	0	0	0	0	0	0	0	118	0	130	0	0	0	488	230	0	0	202	316	264	0	0	0
852	138.02919	2.08	137.022	2482	0	0	0	0	0	0	0	0	2434	2462	2366	2160	1810	1968	2968	2904	3422	0	1992	0	2010	2046	1744	0	1778	1870	0	0	0	0	2942	17142	0	0	2490	2982	2300	2014	0	2796	3122	3362	3022	3060	1172
853	318.06161	2.09	317.054	32376	31164	31356	31502	36658	32816	33176	35586	32936	144400	141984	138192	83266	85872	92962	138858	145678	139034	0	0	0	0	0	0	0	0	0	12214	0	0	15252	14430	0	0	0	13108	54364	0	0	0	0	0	0	0	0	2236
854	148.03461	2.11	147.027	0	0	0	0	1328	1240	0	0	586	0	1336	1298	1220	590	0	0	1000	0	0	550	626	454	352	468	452	524	328	0	230	0	434	0	0	526	586	0	594	250	266	484	384	338	480	454	288	0
855	192.02495	2.12	191.018	0	0	0	0	0	0	0	0	0	0	0	0	0	0	0	0	0	0	34830	0	10684	6054	5748	5404	5580	4052	5790	12614	11904	11942	16736	15656	15134	13526	14144	14216	0	0	0	0	0	7766	7538	11838	13052	782
856	196.81681	2.11	195.81	9002	6776	5692	5216	4684	4654	4340	4156	3686	5582	4980	5650	0	5250	0	4840	4252	4000	2296	1790	3204	2766	2620	2564	2864	2868	3130	0	9176	9102	7678	6244	6380	6950	0	7208	7562	6754	0	6054	8038	6250	5678	4684	5018	3290
857	474.07068	2.15	473.063	0	0	0	262	0	0	0	0	0	0	0	144	228	0	276	0	386	0	6256	1680	1948	650	554	418	462	588	434	0	0	0	0	0	0	178	0	0	0	0	0	0	0	0	0	0	0	0
858	112.01379	2.13	111.007	9348	10556	14970	0	0	0	0	0	0	0	0	0	0	0	0	0	0	0	5300	2392	2090	1272	1794	0	0	1644	0	2016	1928	2886	2380	2696	2598	2302	2172	2298	2780	4250	4280	1674	0	1814	2314	2146	1998	258
859	637.13520	2.14	317.56	0	0	0	0	0	0	0	0	0	176	0	0	0	0	92	0	174	0	0	0	0	0	0	0	0	0	0	0	0	0	0	0	0	0	0	0	0	0	0	0	0	0	0	0	0	0
860	636.11832	2.14	635.111	0	0	0	0	0	0	0	0	0	4234	4472	0	0	0	0	1846	0	3756	0	0	0	0	0	0	0	0	0	0	0	0	0	0	0	0	112	0	0	0	0	0	916	0	0	0	0	0
861	183.05571	2.14	182.048	292	0	0	0	0	0	0	0	0	1268	1158	1368	2752	2508	2678	3100	2880	2698	906	724	798	546	428	0	472	594	456	0	0	496	566	312	0	0	0	0	1088	0	0	934	0	0	1090	1328	1216	1074
862	199.01375	2.16	198.006	716	0	346	0	296	396	552	0	394	0	1838	486	0	0	1622	0	0	1958	0	272	0	0	0	0	0	0	0	758	656	718	700	0	592	288	0	382	0	0	0	110	0	0	0	0	0	0
863	662.19351	2.16	661.186	0	0	0	0	0	0	0	0	0	0	0	114	0	0	0	0	0	0	0	0	0	0	0	0	0	0	0	0	0	0	0	0	0	0	0	0	0	0	0	0	0	0	0	0	0	0
864	93.93289	2.19	92.9256	13880	0	0	8582	0	7660	7116	12614	0	0	3050	2944	4768	2990	3534	3078	2704	3706	0	0	0	372	262	354	284	84	228	6390	5196	5452	0	5398	5306	0	6748	5586	2050	2344	2560	1824	1770	1750	2366	2836	2806	0
865	510.08777	2.17	509.08	0	0	0	0	0	0	0	0	0	0	0	0	0	464	532	0	820	792	0	0	0	0	0	0	0	0	0	0	0	0	0	0	0	0	0	0	0	0	0	0	130	0	0	0	0	0
866	232.00348	2.18	230.996	1070	6684	8504	0	0	0	11962	0	0	1006	4812	5198	0	0	0	7982	0	0	1184	2286	2000	0	0	0	0	0	0	464	2832	3648	3534	4412	3370	2706	2354	1924	0	670	0	0	0	0	0	0	0	326
867	348.03591	2.19	347.029	0	0	0	0	0	0	0	0	0	0	362	0	382	262	304	678	238	502	2126	782	742	0	0	0	0	0	0	0	0	0	0	0	0	0	0	0	0	0	0	0	0	0	0	0	0	0
868	86.03480	2.19	85.0275	2180	2162	2416	3156	3108	2954	3572	2754	3312	2188	1644	2432	1870	1592	1368	1618	1870	1618	358	282	180	266	210	82	182	192	312	470	0	0	0	0	0	0	614	0	634	444	0	306	450	640	338	322	332	0
869	658.11013	2.21	657.103	146	0	0	0	0	0	0	0	528	0	0	2228	0	0	0	0	0	1882	290	0	0	0	0	0	0	0	0	0	0	0	0	0	0	0	0	0	246	0	232	0	0	266	0	0	0	0
870	517.07684	2.22	516.07	0	0	0	104	0	0	0	0	0	292	0	344	0	0	0	488	210	0	0	0	0	0	0	0	0	0	0	0	0	0	0	0	0	0	0	0	0	0	0	0	0	0	0	0	0	0
871	655.91273	2.23	654.905	0	0	0	0	0	0	0	0	0	0	0	0	0	0	0	0	0	0	0	0	0	286	326	242	0	0	336	0	0	0	0	0	0	0	0	0	0	0	0	0	0	0	0	0	0	0
872	217.98750	2.26	216.98	0	0	0	0	0	0	0	0	59950	3512	4964	3896	5642	5882	6122	5538	6312	7122	0	0	4360	2378	2486	1860	2712	2634	2126	918	3634	11942	8496	5396	4768	3132	3092	3054	2232	3278	3154	2344	1874	1610	1462	1454	1248	0
873	480.11525	2.29	479.108	0	0	0	0	0	0	0	0	0	0	0	0	0	0	0	0	0	0	0	0	0	0	0	0	0	0	372	0	0	0	0	0	0	0	0	0	0	0	0	0	270	114	0	0	0	0
874	271.98168	2.27	270.974	0	0	0	0	0	0	0	0	0	0	0	0	0	0	0	0	0	0	0	156	0	0	0	0	0	0	0	0	0	0	0	0	0	0	276	0	0	0	0	0	0	0	0	0	0	0
875	318.19703	2.27	317.19	0	0	0	0	0	0	0	0	0	0	1728	1510	0	0	0	1636	0	1622	0	0	0	0	0	0	0	0	0	0	0	0	0	0	0	0	0	0	0	0	0	0	0	0	0	0	0	0
876	262.03547	2.24	261.028	1498	1590	0	1716	1310	1322	1402	1984	1838	1658	1772	1718	0	1314	0	2394	2616	2406	6158	6458	5418	3312	2764	3084	2824	2600	2544	1510	1778	1496	1608	0	0	1616	1992	0	0	0	1258	0	1320	1120	0	0	1118	0
877	406.03507	2.28	405.028	580	1676	0	1878	214	1766	2738	2524	346	16868	3978	0	0	0	4516	0	0	0	0	0	0	0	0	0	0	0	0	0	0	0	0	0	0	0	0	0	0	0	316	0	0	0	0	0	0	0
878	196.81722	2.28	195.81	0	4328	4010	0	0	4048	3256	3978	4008	0	0	4312	0	4736	0	4182	4072	3734	0	1538	0	0	2668	2980	3048	3222	3248	6122	0	6480	6792	0	5504	0	0	6970	0	0	0	5594	6092	5912	0	4670	4768	3498
879	318.33620	2.29	317.329	0	0	0	0	0	0	0	0	0	0	0	0	0	0	0	0	0	0	0	0	0	0	0	0	0	0	0	0	0	0	0	0	0	0	0	0	0	0	0	0	0	0	0	0	0	0
880	312.01832	2.3	311.011	0	0	0	0	0	0	0	0	0	0	0	0	0	0	0	0	0	0	2138	1742	1236	446	0	450	0	520	550	0	0	0	0	0	0	0	0	0	0	0	0	0	0	0	0	0	0	0
881	261.02964	2.29	260.022	0	408	266	0	0	220	0	404	274	0	0	0	0	0	1018	1756	1440	1394	0	46704	0	0	0	0	0	0	0	0	0	0	894	0	968	0	0	0	0	0	0	414	390	0	448	500	0	0
882	130.02406	2.28	129.017	5776	5058	0	8168	5978	5328	7472	4386	7886	0	4596	4740	2754	3004	4148	0	0	3946	0	0	0	520	622	0	0	454	358	0	0	0	1310	1400	0	1286	1168	0	1048	972	0	0	0	0	0	810	1016	406
883	125.99665	2.28	124.989	1494	1680	1720	1664	2108	2102	1780	1782	2384	5014	3608	3718	2644	2586	2672	2354	2388	2516	1482	1654	1862	2152	1920	0	0	0	0	0	0	1446	1678	1456	1228	1072	0	1506	786	0	462	0	584	656	0	994	1048	0
884	318.06155	2.31	317.054	0	0	0	0	0	0	0	0	0	0	0	0	0	0	0	0	0	0	0	0	0	0	0	0	0	0	0	12928	0	0	0	0	0	12630	0	0	0	0	0	0	0	0	0	0	0	3258
885	391.99427	2.28	390.987	4714	5452	5792	5082	6154	6052	5414	5122	5760	7626	0	7392	0	0	0	0	0	10298	0	0	564	0	226	270	0	0	0	2986	2306	2378	3198	2836	2776	2996	2610	2986	3604	3804	4020	0	4306	3616	3798	4354	3614	0
886	62.99439	2.29	61.9871	0	0	514	0	0	0	0	0	0	960	0	0	1356	1470	1552	0	1414	1034	0	11134	0	0	3588	4030	3784	3522	4244	1534	1218	1266	0	1496	1412	1346	1442	1372	0	1356	1088	0	1394	0	1774	1790	1570	3558
887	218.05437	2.32	217.047	0	0	0	0	0	0	0	0	0	0	0	0	0	0	0	0	0	24084	0	0	0	0	0	0	0	0	0	0	0	0	0	0	0	0	0	0	3062	3172	3040	2574	2610	2840	3090	3238	4216	0
888	318.28946	2.32	317.282	0	0	0	0	0	0	0	0	294	1022	0	0	0	0	0	0	0	0	0	0	0	0	0	0	0	360	0	0	0	0	0	0	0	0	0	0	0	0	0	0	0	0	0	0	0	0
889	247.99816	2.36	246.991	0	0	11824	9202	8330	9462	0	6298	7414	0	1474	1646	2196	2718	2400	2638	2044	2898	606	0	0	11418	0	8154	0	0	12074	1208	1966	4672	3380	2440	2162	1814	1666	1712	1550	1422	1116	1050	0	1294	1220	1064	0	304
890	182.07773	2.32	181.07	2738	2550	2910	2802	2944	3494	2690	3312	3360	1812	1850	2038	1814	1748	1670	2288	2988	2478	0	298	402	420	0	320	0	360	366	5392	4724	4820	5492	5652	6252	6060	6582	6412	0	888	534	496	0	596	0	838	0	0
891	510.08768	2.34	509.08	0	0	0	0	0	0	0	0	0	0	402	0	0	0	0	0	0	740	228	0	324	0	0	0	0	0	0	0	0	0	0	0	0	0	0	0	0	0	0	0	0	0	180	0	0	0
892	138.02950	2.35	137.022	18992	25484	23908	23194	23252	23888	23602	24192	23670	2008	2720	2200	1436	1956	2198	3392	3548	3552	2000	2842	2428	2184	2028	2162	1982	2252	1970	17240	17166	18012	21414	21406	21008	21396	21968	22728	2974	3688	3074	3274	3016	3086	3928	3900	3830	1186
893	532.07029	2.34	531.063	0	0	536	0	0	0	0	294	0	6010	10728	5598	0	3564	3954	0	0	0	306	0	0	0	0	0	0	0	0	0	0	0	0	0	0	0	0	0	668	0	0	246	328	0	222	0	0	0
894	637.13865	2.33	317.562	0	0	0	0	0	0	0	0	0	116	116	196	0	68	114	140	86	0	0	0	0	0	0	0	0	0	0	0	0	0	0	0	0	0	0	0	0	0	0	152	0	0	0	0	0	0
895	636.12141	2.33	635.114	216	0	0	318	232	282	0	228	198	3970	3396	3154	1944	0	1822	2880	1676	2626	0	0	0	478	0	396	414	270	0	0	0	0	0	0	0	0	142	0	346	0	236	656	0	0	0	0	194	0
896	206.39509	2.33	205.388	0	0	0	0	0	0	0	0	0	0	0	0	0	0	0	0	0	0	0	0	0	0	0	0	0	0	0	0	0	0	0	0	0	0	0	0	0	0	0	0	0	0	0	0	0	0
897	199.01425	2.33	198.007	0	0	268	320	240	0	256	0	0	176	0	0	432	0	0	602	374	698	0	0	0	0	0	0	0	0	0	0	214	0	192	0	0	370	0	222	0	0	0	0	0	0	0	0	0	0
898	192.02509	2.39	191.018	0	0	0	0	0	0	0	0	0	0	0	0	0	0	0	0	0	0	0	0	7512	6162	5090	5086	3730	3700	3524	6190	0	0	7886	7062	0	0	0	0	0	6176	5594	4132	2330	0	0	2634	2920	0
899	156.00727	2.37	155	7414	0	10096	8338	9472	0	0	0	0	3344	3610	4250	0	5648	5350	6666	7314	8548	0	0	0	0	0	0	0	0	0	0	0	0	0	10938	10260	0	0	0	1788	0	1576	1706	1606	1966	1894	1678	1622	0
900	658.09930	2.37	657.092	0	0	236	0	0	228	0	0	0	1918	2614	0	878	0	982	2082	1540	2064	0	440	0	0	0	0	0	0	0	0	0	0	234	0	0	0	0	0	230	408	0	320	248	0	180	0	0	0
901	348.03632	2.4	347.029	228	0	0	240	0	0	218	0	0	0	0	0	0	236	0	314	194	0	648	468	578	784	0	0	0	0	0	0	0	0	0	0	0	0	0	0	0	0	0	0	0	0	0	0	0	0
902	112.01411	2.41	111.007	5616	8270	0	3800	5652	4164	5012	4470	4014	0	0	0	0	6788	0	0	0	5774	2252	2052	1756	0	0	926	880	692	0	0	1638	1404	2200	1782	2448	1782	1752	2380	1836	2650	0	1180	1278	0	0	1314	1650	196
903	232.00363	2.39	230.996	986	8834	9260	10314	0	0	0	0	0	0	5402	5812	6568	0	9752	9292	11200	13046	1444	2602	1936	0	1370	1440	1302	0	1338	0	2672	4354	3732	3828	3640	3140	2166	1694	0	0	0	0	0	0	704	0	680	300
904	109.90673	2.43	108.899	0	24958	24872	0	0	0	0	0	25364	0	5488	9132	0	0	0	7298	0	0	0	0	0	148	0	0	0	142	186	0	0	0	0	0	0	0	0	0	6512	4806	5902	0	5468	4858	7336	7456	0	0
905	217.91508	2.43	216.908	0	0	0	0	0	0	0	68	0	0	0	0	0	0	0	0	230	0	0	0	0	4928	5362	6140	5694	7088	5754	314	0	0	0	0	0	0	0	0	0	0	0	0	240	0	370	368	0	0
906	303.95579	2.44	302.949	0	0	0	0	0	0	0	0	0	0	0	0	0	0	0	0	0	0	0	0	0	0	0	0	260	326	0	0	0	0	0	0	0	0	0	0	0	0	0	0	0	0	0	0	0	0
907	97.96497	2.43	96.9577	5484	3172	3458	2838	2460	2542	3106	2870	3416	2770	2362	3968	3678	3758	3022	3410	3576	3514	9546	0	0	0	0	0	0	0	0	20796	8818	6654	4186	4586	4786	5004	3658	4244	3764	3614	7028	8888	11646	0	13382	0	10604	1966
908	217.98762	2.46	216.98	240	0	0	0	0	0	0	54338	0	3200	4964	5462	6342	0	6616	5936	0	0	1614	0	4218	2352	2510	2422	2292	3066	2760	1048	4460	0	7374	5786	5048	3278	3506	2854	2556	3072	2740	2254	1920	1714	1328	1344	0	0
909	391.99467	2.46	390.987	5384	4882	6060	4976	5302	5096	4906	6416	5164	11702	14122	13338	10974	11268	11218	12278	10406	0	0	472	524	300	0	0	0	0	0	2846	2896	2578	3198	3246	2790	3078	2596	2638	2960	2878	4354	3956	4270	2834	3074	0	3138	0
910	318.19916	2.47	317.192	0	0	0	0	0	0	0	0	0	0	0	1152	0	0	0	0	0	0	0	0	0	0	0	0	0	0	0	0	0	0	0	0	0	0	0	0	0	0	0	0	0	0	0	0	0	0
911	474.07059	2.46	473.063	0	0	0	0	0	0	0	0	0	0	0	0	0	0	222	0	0	0	0	0	0	538	380	0	0	0	380	0	162	174	0	0	0	0	0	0	0	0	0	0	0	0	0	0	0	0
912	318.06202	2.49	317.055	0	0	0	0	0	0	0	0	0	0	0	0	0	0	0	0	0	0	0	0	36600	29944	33178	0	29286	30730	30150	12884	12242	12368	0	11080	0	12358	13046	12586	0	0	13594	0	0	0	10646	0	0	3592
913	655.91488	2.47	654.908	0	0	0	0	0	0	0	0	0	0	0	0	0	0	0	0	0	0	0	0	0	0	348	0	0	254	0	0	0	0	0	0	0	0	0	0	0	0	0	0	0	0	0	0	0	0
914	332.01958	2.49	331.012	0	0	0	0	0	0	0	0	0	0	0	0	0	0	0	0	0	0	0	0	0	0	0	0	0	0	0	0	0	0	0	0	0	0	0	0	0	0	0	0	0	0	0	0	0	0
915	406.03466	2.49	405.027	0	0	248	0	0	214	0	276	0	3932	0	0	0	436	0	0	0	0	0	0	0	0	0	0	0	0	0	0	0	0	0	0	0	0	0	0	0	0	0	0	0	0	76	0	0	0
916	182.07734	2.52	181.07	2202	2224	2534	2896	3248	2878	2850	3066	2746	2332	1916	1980	1758	1808	0	2660	2606	3144	522	344	0	0	0	436	320	0	346	4978	4496	4662	5118	0	6260	6082	5776	6982	0	0	382	588	0	0	0	616	488	0
917	491.93007	2.52	490.923	0	0	0	0	0	0	0	0	0	0	254	216	0	224	224	458	402	0	0	0	0	0	0	0	0	0	0	0	0	0	0	0	0	0	0	0	0	0	178	0	0	0	0	0	0	0
918	206.39542	2.55	205.388	0	0	0	0	0	0	0	0	0	0	0	0	0	0	0	0	0	0	0	0	0	0	0	0	0	0	0	0	0	0	0	0	0	0	0	0	0	0	0	0	0	0	0	0	0	0
919	411.97581	2.55	410.969	0	0	0	0	0	0	242	0	0	0	0	430	0	438	0	0	0	0	0	0	0	0	130	0	0	0	0	380	0	0	0	0	0	0	0	0	0	0	0	0	0	0	0	0	0	0
920	62.99438	2.53	61.9871	0	0	0	806	0	808	0	776	796	0	996	1122	1664	2002	1888	1438	1446	1374	13224	6420	6714	4164	3552	4016	4822	3752	3952	1738	1214	1262	1424	1282	1866	1296	1348	1422	1310	1710	1588	1598	1556	1494	1656	1772	1522	3626
921	126.02919	2.53	125.022	0	482	228	0	722	0	550	518	564	0	0	0	0	0	586	292	0	0	0	0	0	0	0	0	458	0	0	126	356	0	204	668	296	294	354	0	0	526	296	150	358	314	0	514	370	0
922	285.94478	2.54	284.938	0	0	0	0	0	0	0	0	0	0	0	118	0	0	498	0	216	0	98	0	0	0	708	0	492	432	486	0	234	0	0	0	0	0	0	0	0	0	0	178	150	162	0	272	0	0
923	196.81715	2.56	195.81	5488	4242	3514	3038	2906	3064	2786	2668	3100	5150	4186	4224	3966	4230	4386	3578	2972	3508	0	2570	3954	2562	1840	3006	2066	1816	1598	5886	4506	4802	4324	3900	4960	4574	4050	4522	5502	4974	5432	5462	5264	4808	4578	4408	4286	2764
924	156.00714	2.59	155	7790	7642	7974	8138	8984	8904	7988	9212	0	3542	3298	3844	4742	5182	5064	6548	6822	6468	0	0	0	0	0	0	0	0	0	12496	11260	0	10116	10658	10516	9516	9002	9056	1876	1704	1622	1588	1582	2376	1704	1854	1710	306
925	194.02797	2.59	228.995	0	0	0	488	0	436	454	0	526	0	0	0	0	0	0	0	0	0	0	0	0	0	0	0	0	0	0	0	0	0	0	0	0	0	0	270	0	0	0	0	226	0	0	0	0	0
926	109.90683	2.62	108.9	25738	0	0	27788	27278	26644	24980	25290	0	0	9914	8748	15460	18214	16524	12482	12572	11446	0	654	556	166	152	128	0	88	68	22272	24958	24828	25518	25492	24352	28270	0	27024	5834	5996	5882	5568	5428	4500	7272	7804	7218	758
927	205.98633	2.62	204.979	0	0	168	222	0	0	0	246	376	0	168	0	244	232	0	326	0	382	224	640	0	1166	0	1394	0	1252	0	382	0	0	138	256	0	392	372	234	378	326	342	338	300	246	280	254	530	128
928	161.96781	2.6	160.961	366	280	158	260	364	544	0	302	396	158	214	184	206	110	0	96	124	220	0	0	0	0	0	0	0	0	0	0	220	0	208	0	0	0	0	0	0	90	0	0	108	0	0	0	0	0
929	639.94026	2.6	638.933	0	0	144	0	0	0	0	0	0	0	0	0	0	0	0	0	0	0	0	0	0	0	0	0	0	0	0	0	0	0	0	0	0	0	0	0	0	0	0	0	0	0	0	0	0	0
930	130.02453	2.6	129.017	3418	3892	3930	4788	4602	4290	4444	3870	4090	2312	3426	1910	1708	1814	2032	2168	2416	2178	0	0	0	384	0	0	0	396	428	0	1040	0	1522	1074	1096	1264	1072	1136	0	786	0	0	414	0	0	354	0	286
931	658.10588	2.61	657.099	186	0	0	180	0	0	0	0	0	0	0	2206	0	0	0	0	0	0	0	0	0	0	0	0	0	0	0	0	0	0	0	0	0	0	0	0	0	0	0	136	0	0	278	0	0	0
932	183.05512	2.62	182.048	174	0	0	0	0	0	0	0	0	0	1190	0	2098	1926	2468	2680	2862	2770	544	630	480	648	706	0	332	458	580	0	0	0	376	476	504	460	0	0	0	956	704	748	0	0	0	0	0	92
933	86.03426	2.6	85.027	1332	1724	2190	2106	2036	2134	1998	2194	2498	1176	1246	1298	936	1074	0	1254	1324	1476	190	544	392	260	168	318	260	264	290	402	0	0	0	330	0	314	436	230	0	0	296	252	174	170	0	330	170	168
934	636.12229	2.59	635.115	0	0	0	0	0	202	0	0	278	0	2568	3072	438	0	0	0	0	0	464	456	380	0	0	0	0	0	178	0	0	0	0	0	0	0	0	0	0	0	0	0	0	0	0	0	0	0
935	160.07167	2.61	159.064	1434	1522	0	0	1010	1100	1244	916	1060	1370	0	1342	1166	1132	1086	1128	930	1080	3122	4672	5700	4538	4498	4356	4282	4190	3884	430	358	0	608	0	458	212	590	394	2716	2604	2622	2704	2368	2240	2592	2634	3188	2456
936	218.05464	2.62	217.047	0	0	0	0	0	0	0	0	0	15624	16852	16118	16640	15566	0	25622	23960	0	0	0	0	0	0	0	0	0	0	0	0	0	0	0	0	0	0	0	2582	2980	2666	2530	2626	2588	3284	3128	2752	246
937	192.02527	2.65	191.018	0	0	0	0	0	0	0	15318	0	0	0	0	0	0	0	0	0	0	0	0	6764	5738	4854	4030	3988	3386	3150	3010	0	2994	0	3084	4278	4072	2708	2904	5180	3290	3966	2414	2382	2022	2826	2742	2444	0
938	127.90998	2.65	126.903	1550	1368	1414	1716	1524	1602	0	1686	1950	1110	0	1312	1360	1396	0	0	1530	1958	0	5710	2352	2116	1942	1930	1588	1678	1794	2010	1820	1966	2522	2488	2294	2624	2434	2456	0	0	0	0	0	0	0	0	0	0
939	261.02934	2.66	260.022	296	262	174	198	292	274	262	330	0	0	0	0	0	1020	0	1566	1666	0	59420	0	0	21512	0	22616	20456	21478	22130	0	0	0	0	1024	0	0	0	1066	466	0	416	526	454	352	626	0	466	68
940	199.01472	2.7	198.007	250	346	0	0	210	214	170	160	348	304	248	212	338	346	0	156	530	0	510	252	0	290	0	0	0	0	0	0	0	0	134	0	0	0	0	434	192	0	0	0	0	0	0	120	0	0
941	97.96504	2.66	96.9578	5918	3722	3378	2722	2912	2754	3136	3436	0	0	2382	4644	3876	4686	3296	2964	3764	3484	0	0	0	0	0	0	0	0	0	0	0	5766	4718	4906	0	4354	3578	4228	4236	0	0	0	0	0	0	0	0	1844
942	217.91538	2.66	216.908	0	0	0	0	0	0	0	56	0	106	0	116	0	0	142	0	0	0	72	0	370	4482	5310	5852	6458	6108	6280	556	146	138	0	190	0	0	0	0	0	0	0	202	182	226	574	334	260	0
943	510.08922	2.7	509.082	0	0	0	0	0	0	0	0	0	0	306	212	436	0	0	0	348	0	0	0	0	0	0	0	0	0	0	0	0	0	0	0	0	0	0	0	0	0	0	0	0	0	0	0	0	0
944	262.03545	2.65	261.028	0	1202	1570	1464	1812	1578	0	1672	1388	2062	2314	2088	1612	1410	1360	2166	1930	2402	8392	4376	3856	3454	3026	2818	3038	2970	3106	1598	1390	1784	1428	1722	0	0	1574	1262	1030	0	1272	0	596	0	0	692	624	0
945	126.02878	2.73	125.022	0	0	0	0	0	0	0	240	656	0	0	0	0	0	0	0	0	0	0	0	0	0	0	0	0	0	0	0	0	0	0	0	0	0	260	0	0	0	286	480	400	396	0	0	0	0
946	303.95559	2.72	302.948	0	0	0	0	0	0	0	0	0	0	0	0	0	0	0	0	0	0	0	0	0	284	412	0	474	352	468	0	0	0	0	0	0	0	0	0	0	0	0	0	0	0	0	0	0	0
947	112.01411	2.7	111.007	3964	3770	3758	3938	3624	4014	3636	2656	3190	0	7270	7504	3896	4540	4522	5050	6202	5380	1768	1518	1770	1092	0	0	0	0	0	0	0	1180	1338	0	0	0	0	1456	1442	1686	0	0	0	0	1302	1426	1450	134
948	182.07730	2.76	181.07	2606	2236	2176	2916	2400	2496	2378	2264	2746	1904	1782	2120	1670	1710	1948	2440	2464	2824	0	584	446	0	494	0	0	278	350	3732	4556	4236	5546	4914	5424	5150	5374	6078	0	724	696	534	0	688	0	704	626	0
949	109.90667	2.8	108.899	0	0	0	0	0	0	0	0	0	0	0	9186	0	17126	0	0	12336	11048	0	0	0	260	170	86	134	94	124	0	0	0	0	0	0	0	27512	0	5302	5560	5008	4330	4502	4456	5754	7360	6768	0
950	161.96763	2.78	160.96	0	274	230	180	376	270	154	0	270	0	132	0	0	192	0	154	0	0	0	0	0	0	0	0	0	0	0	0	0	0	0	0	162	0	322	212	110	0	0	0	0	0	0	0	0	0
951	449.93206	2.82	448.925	0	0	0	0	0	0	0	0	0	0	0	0	0	0	0	0	0	0	0	0	0	0	0	0	350	222	0	0	0	0	0	0	0	0	0	0	0	0	0	0	118	0	0	0	0	0
952	655.91522	2.79	654.908	0	0	0	0	0	0	0	0	0	0	0	0	0	0	0	0	0	0	0	0	0	0	0	224	0	146	290	0	0	0	0	0	0	0	0	0	0	0	0	0	0	0	0	0	0	0
953	639.94380	2.81	638.937	0	0	0	0	106	0	138	0	0	0	0	0	0	0	138	0	0	0	0	0	0	0	0	0	0	0	0	0	0	0	0	0	0	0	0	0	0	0	0	0	0	0	0	0	0	0
954	217.91529	2.84	216.908	0	0	0	0	0	0	0	0	0	0	0	0	0	0	0	0	166	0	338	0	352	5422	5460	5498	6294	6164	6400	0	256	182	0	0	0	0	0	0	0	0	0	0	242	680	256	0	506	0
955	156.00727	2.79	155	7716	0	7696	0	8186	0	7324	6520	5766	3190	3022	4138	4616	5034	4706	5556	4598	5276	0	0	80124	69274	68176	60494	64832	65960	67374	0	11784	11236	12002	0	9952	9516	9702	0	1376	1384	1324	1328	0	0	1152	0	0	0
956	122.03448	2.79	121.027	7424	7100	5650	7490	7490	6944	6412	7308	7562	2676	2848	2642	3670	3182	3492	4030	3730	3704	5622	6278	6546	5274	5426	4930	5312	5660	4922	2996	3174	3858	3654	3562	3346	3610	3830	4048	10440	10080	9472	8786	10438	9324	11518	12298	12342	6532
957	348.03642	2.81	347.029	0	0	0	0	0	0	0	0	0	0	0	246	206	0	0	0	0	0	0	414	608	694	398	576	196	0	278	0	0	0	0	0	0	0	0	0	0	0	0	0	0	0	0	0	0	0
958	532.06935	2.79	531.062	274	0	0	374	0	0	0	0	0	2338	0	0	0	0	0	1818	0	338	376	0	0	0	0	0	0	0	0	0	0	0	0	0	0	0	0	0	0	0	0	0	0	0	0	148	0	0
959	97.96491	2.85	96.9576	5848	3428	3424	2896	3354	3202	3388	3560	3070	2850	2672	4896	3830	4716	3760	3422	3510	4088	0	0	0	0	0	0	0	0	0	21452	9178	6720	5156	5516	4904	4136	4128	3914	4282	4244	10262	0	0	0	0	0	0	1868
960	422.00956	2.88	421.002	0	0	0	312	444	0	0	0	366	0	798	0	430	0	0	662	0	0	0	0	0	620	640	392	340	508	0	0	0	0	0	0	126	0	0	0	0	140	280	108	0	0	0	0	0	0
961	112.01418	2.89	111.007	2952	3684	2954	3410	3510	3070	3558	2764	3844	0	5990	6786	3534	3156	3566	4940	4376	4882	1758	1574	0	0	0	0	0	0	0	0	0	1094	1292	0	0	0	0	0	0	1284	1416	0	0	0	0	0	1458	0
962	658.10621	2.89	657.099	0	0	0	0	0	0	0	0	0	0	0	244	0	0	0	0	0	0	0	0	0	0	0	0	0	0	0	0	0	0	0	0	0	0	0	0	0	0	0	0	0	0	0	0	0	0
963	93.93274	2.91	92.9255	14378	15552	16160	0	0	16974	15770	16644	0	6606	7204	6534	8580	8976	9646	8590	8818	8350	0	0	0	244	216	202	232	176	234	7742	8898	8592	9138	9668	9304	10216	10248	11102	3330	3188	3542	2726	2530	2298	4266	4202	3912	0
964	217.98749	2.92	216.98	0	0	0	0	0	79586	0	0	0	4628	0	6322	7848	0	7040	7546	0	0	1722	0	5472	3444	3082	3280	3086	3158	2764	1030	3550	0	6712	4900	4674	3998	3994	3844	3366	3490	3012	2654	2010	1868	1434	1804	1244	0
965	411.97623	2.91	410.969	0	0	368	0	0	0	0	0	0	0	302	0	0	0	0	0	270	422	0	166	0	0	0	0	0	0	0	0	0	0	310	0	0	0	0	0	0	0	0	0	0	0	0	0	0	0
966	332.01960	2.91	331.012	0	0	0	0	0	0	0	0	0	0	0	0	0	0	0	0	0	0	0	0	0	0	0	0	0	0	0	0	0	0	0	0	0	0	0	0	0	0	0	0	228	0	0	0	0	0
967	491.93316	2.91	490.926	0	166	296	0	0	142	0	0	0	0	204	140	0	142	232	146	0	0	0	0	0	0	0	0	0	0	0	0	0	0	0	0	0	0	0	0	0	0	0	0	0	0	0	0	0	226
968	126.02925	2.96	125.022	338	308	0	438	492	508	264	484	498	0	0	0	330	0	0	0	0	0	0	0	0	0	0	0	0	248	0	0	0	0	0	90	342	0	426	292	262	424	0	552	570	646	580	600	678	0
969	206.39568	2.96	205.388	0	0	0	0	0	0	0	0	0	0	0	0	0	0	0	0	0	0	0	0	0	0	0	0	0	0	0	0	0	0	0	0	0	0	0	0	0	0	0	0	0	0	0	0	0	0
970	285.94477	2.95	284.938	0	0	0	0	0	0	0	0	0	0	344	0	448	0	0	0	0	0	228	0	568	590	486	710	488	608	0	0	536	0	0	0	0	0	0	0	246	236	0	264	290	272	180	164	238	0
971	318.06091	2.92	317.054	0	0	9668	7666	11144	0	6118	3408	5976	0	0	0	0	0	0	0	0	0	35852	0	0	0	0	0	0	0	9074	3252	0	7116	0	4182	4984	4168	3872	0	0	5634	0	0	5908	5434	6100	6890	0	890
972	205.98669	2.96	204.979	0	110	118	328	308	316	330	240	346	386	252	286	352	300	346	460	404	0	768	822	0	0	1410	0	0	0	1254	0	0	330	268	328	0	480	458	306	148	0	0	668	316	0	328	470	762	0
973	130.02416	2.93	129.017	2922	2996	3150	3754	3780	3682	4234	3332	3522	0	1788	0	1730	1786	1500	2396	2164	2614	0	0	0	0	0	0	0	0	0	0	1000	0	0	0	0	0	0	0	0	0	0	0	0	0	0	0	0	0
974	127.91022	2.98	126.903	1662	0	0	1750	1658	0	1906	2084	1798	1398	0	1140	1260	1382	1308	1674	1758	1666	6430	0	2284	1732	2020	0	1572	0	1724	2776	1922	1984	2634	2486	2598	2496	2518	2600	0	0	0	0	0	0	0	1350	1210	0
975	406.03507	2.95	405.028	0	0	0	0	0	0	0	0	0	0	0	0	0	0	256	896	0	0	0	0	0	0	0	0	0	0	0	0	0	0	0	0	0	0	0	0	0	0	0	0	0	0	0	0	0	0
976	196.81727	2.97	195.81	4726	3072	3122	2752	2366	2046	2376	2234	2126	4954	3842	3966	3704	3708	3816	3520	3332	3008	2760	3634	3438	1950	1976	2528	2626	2524	3394	5146	4380	4548	0	3708	3782	3512	3632	3306	4798	4490	4474	4604	4452	4188	4290	3216	3922	2154
977	218.05492	2.97	217.048	0	0	0	0	0	0	0	0	0	0	0	0	0	0	18700	0	0	0	666	0	0	0	0	0	0	0	0	0	0	0	0	0	0	0	0	0	2794	2604	2740	2788	2684	2638	3176	3656	3024	226
978	449.93373	3.02	448.926	0	0	0	0	0	0	0	0	0	0	0	0	0	0	0	0	0	0	0	0	0	0	0	0	0	0	0	0	0	0	0	0	0	0	0	0	0	0	0	0	0	0	0	0	0	0
979	97.96490	3.03	96.9576	6040	3694	3576	2854	2546	2948	3402	3250	3332	3316	3210	5608	4868	4530	3896	3790	3938	4376	11408	15134	0	0	0	0	0	0	0	20890	9684	7210	5830	5186	5334	4220	3938	4462	4730	5092	10486	13990	0	14588	0	16278	0	1992
980	174.01510	3.05	173.008	2818	2912	2584	3364	3104	2640	3268	2698	2384	2206	2490	2532	1848	1608	1706	2328	2150	2046	962	1060	0	0	418	430	0	490	514	0	0	0	0	0	936	974	1092	0	340	346	308	312	342	294	316	282	388	230
981	130.02438	3.11	111.007	3450	3662	2994	3724	3188	2434	2892	3126	2792	4774	5004	5070	0	3268	3340	3766	4102	4196	2028	1282	1608	0	0	0	858	0	0	0	0	0	0	1468	0	0	0	0	1238	1154	0	0	1294	1388	0	1734	1500	262
982	348.03573	3.09	347.028	0	0	0	0	0	0	0	292	0	0	0	0	0	0	0	0	0	0	452	492	626	476	334	0	264	0	0	0	0	0	0	0	0	0	0	0	0	0	0	0	0	0	0	0	0	0
983	192.02544	3.08	191.018	0	0	0	0	0	0	0	13220	0	0	0	0	0	0	0	0	0	0	9234	7226	7910	6000	4562	4174	3706	3036	2794	2038	2104	2060	2860	2676	2900	2140	2550	2606	4044	3912	3286	2366	2296	2032	2078	2206	1940	288
984	267.81056	3.11	266.803	0	464	512	586	404	428	370	514	0	318	330	0	394	0	0	230	0	0	0	0	0	0	0	0	0	0	0	1206	0	664	430	388	412	362	476	402	0	266	0	650	0	378	0	0	0	19282
985	658.10395	3.14	657.097	0	0	0	0	0	0	0	0	0	0	0	0	0	0	0	0	0	0	0	0	0	0	0	0	0	0	0	0	0	0	0	0	0	0	0	0	0	0	0	0	0	0	0	0	0	78
986	93.93270	3.14	92.9254	0	0	0	0	0	0	0	0	0	8426	8112	6618	8710	9046	0	0	8616	8108	0	0	0	0	246	0	202	210	334	7224	8190	0	8498	8468	8560	9148	9504	9994	2932	2998	2664	2252	2530	2794	3496	4312	3400	49164
987	217.98712	3.22	216.98	0	0	0	0	73782	0	89306	0	0	4336	7114	8308	8608	10194	9402	9032	0	13930	1990	0	5850	3540	3128	3384	3384	3060	3122	1828	3594	9326	7018	4880	4208	3258	3782	3278	3358	3872	3240	2892	2206	1922	1556	1780	1632	0
988	195.93338	3.17	194.926	120	0	194	0	132	104	78	142	0	0	0	0	284	0	0	0	0	148	642	0	972	0	34008	35666	35336	40224	37816	0	230	356	328	450	232	250	0	0	236	264	572	626	0	1210	918	1082	0	168
989	218.05450	3.22	217.047	0	18302	20530	0	0	21644	0	0	0	14336	0	0	0	0	0	0	0	0	0	0	0	0	0	0	0	0	0	0	0	0	0	0	0	0	0	0	2698	2794	2738	2444	2500	2540	3022	2792	2822	0
990	247.99819	3.19	246.991	0	14758	12266	9790	0	8968	9554	4288	4088	0	2164	2226	2896	4558	4440	4150	3750	3578	1208	0	0	0	12194	0	0	0	12740	1342	2550	4158	3306	2152	2244	1658	1902	1550	2560	1720	1496	1594	1726	0	1574	0	0	0
991	406.03623	3.19	405.029	0	0	0	0	0	0	0	0	0	0	678	622	0	0	0	518	350	0	0	0	0	0	0	0	0	0	0	0	0	0	0	0	0	0	0	0	0	0	0	0	0	0	0	0	0	0
992	97.96532	3.22	96.958	6066	4278	3406	3454	0	3570	3784	3650	3378	3244	3236	5290	4662	0	3284	0	4108	4508	0	0	0	0	0	0	0	0	0	0	9254	6170	5518	5284	4746	4250	3624	4344	0	5252	0	0	0	0	0	0	0	0
993	196.81760	3.18	195.81	3958	3172	2884	2376	1862	2586	2192	1988	2230	4066	3764	3612	4062	3620	3286	2964	2928	3208	3824	4292	5780	3802	3002	2994	3038	3424	3224	5054	4396	4314	3376	3184	3904	3276	3334	3226	4546	3722	3732	3740	3986	3932	3314	3300	3704	1874
994	156.00782	3.27	155.001	6548	0	7088	6304	5542	4428	4200	3054	0	1792	1834	2228	2384	0	4064	2088	2106	2822	73224	0	0	0	0	0	0	0	0	4942	5212	5128	5184	4850	5098	3494	4672	3932	1340	1412	0	1728	1326	1310	1066	1132	1130	186
995	532.07012	3.28	531.063	0	0	0	0	0	0	0	0	0	446	498	550	184	108	304	332	514	296	0	0	200	0	0	0	0	0	0	0	0	0	0	0	0	0	0	0	0	0	282	0	0	0	0	0	0	0
996	422.01015	3.33	421.003	0	300	278	494	410	0	0	0	0	0	748	0	218	232	0	380	534	398	0	0	0	414	0	0	356	364	0	124	0	0	0	0	0	0	0	0	0	0	0	338	386	506	470	336	350	0
997	174.01475	3.35	173.007	3018	2970	2798	4134	3332	2862	3138	3156	3004	2012	1940	2244	1924	1770	1840	1984	2398	2058	0	0	0	462	630	404	674	0	492	0	0	0	0	0	0	0	0	0	0	340	546	0	380	304	258	356	220	0
998	130.02464	3.33	129.017	2808	3838	3112	3626	3748	3390	3684	3666	3918	2108	1744	1696	1470	0	1494	2324	2616	2222	0	972	0	590	520	0	556	558	0	1096	0	0	0	0	1156	1248	1148	0	0	424	0	0	500	472	432	0	0	272
999	218.05397	3.39	217.047	0	0	0	0	0	0	0	0	0	0	0	0	0	0	0	0	0	0	0	0	0	0	0	0	0	0	0	0	0	0	0	0	0	0	0	0	2424	2388	2150	2136	2352	2636	2564	2502	2846	0
1000	192.02517	3.36	191.018	0	0	0	0	0	0	0	0	11992	0	0	0	0	16144	0	0	0	0	9946	0	0	5758	4648	3610	3660	2938	2396	2048	1786	2022	2452	2314	3086	2684	2444	2150	3412	3316	3084	2410	2060	1924	2618	2234	2252	276
1001	267.81060	3.36	266.803	0	0	0	0	540	576	0	0	0	304	0	660	0	0	432	0	306	478	0	0	0	0	0	0	0	0	0	1190	0	600	558	372	324	426	366	460	276	370	486	0	0	464	0	672	0	29216
1002	247.99839	3.37	246.991	0	0	0	9420	7074	0	7448	4582	4460	1290	2438	2420	3080	4924	4752	4136	4228	4498	0	94084	17706	13426	12944	12138	14130	12730	13074	1456	2118	3494	2426	2508	2156	1870	1746	1808	2758	1744	1614	1768	1590	1868	1414	1372	1458	0
1003	97.96505	3.4	96.9578	5220	3826	3272	3294	3114	3114	3190	3678	3718	3722	3212	6002	5638	0	3834	4254	4006	4656	12730	14620	0	0	0	0	0	0	0	25264	11468	6130	5956	5854	5908	4726	4002	4602	6234	5328	12648	16770	18388	20762	0	0	19492	1790
1004	182.07766	3.4	181.07	2560	2496	2982	2860	3400	2976	2828	2686	2684	1988	2268	1968	1784	1748	1880	2800	2902	2700	494	336	650	546	514	254	0	380	0	3310	3408	3454	4312	4484	4510	4538	4996	5740	0	0	910	866	640	756	540	566	570	344
1005	406.03601	3.41	405.029	252	0	0	0	0	0	0	0	0	362	338	546	0	0	0	400	398	554	0	0	0	280	0	0	0	0	0	0	0	0	0	0	0	0	0	0	0	0	0	324	0	0	0	0	0	0
1006	109.90666	3.42	108.899	0	0	24832	0	0	0	22368	0	0	0	11878	11160	0	17638	0	11646	10266	9942	0	0	0	248	266	256	148	240	192	0	0	20740	0	0	0	0	0	0	5228	4990	4566	3950	4392	3850	4904	4882	4856	0
1007	195.93341	3.46	194.926	0	0	0	0	0	0	0	142	0	0	0	0	0	0	0	202	128	208	0	0	0	28410	0	0	0	0	0	0	0	0	284	302	0	230	0	152	242	0	0	0	0	0	0	0	0	0
1008	136.03505	3.48	135.028	3112	5252	4790	5096	6448	5790	5566	5286	5322	1816	1628	0	1394	1210	0	1742	1670	1570	1526	1700	2046	1238	0	1102	0	1126	1318	4356	5688	5644	0	7344	7086	7316	7094	6858	0	436	0	0	0	0	0	0	626	0
1009	217.98722	3.44	216.98	240	0	0	0	0	0	0	0	0	4612	9450	9026	11468	0	0	0	0	0	2316	25184	6070	3632	4022	3604	3042	3514	3972	0	3672	0	0	5566	4420	3812	5122	3546	4456	4518	3002	3276	2618	2064	0	1662	1482	0
1010	112.01388	3.45	111.007	3332	2692	2496	2502	3170	2552	2672	2836	3068	4590	3768	3606	2450	2648	3126	3660	3746	3482	1828	1648	1610	0	1162	0	676	0	904	0	908	1148	0	0	1380	0	1330	1394	0	0	1388	1260	1364	1338	1334	1320	1556	194
1011	93.93284	3.49	92.9256	0	0	0	17050	0	17450	16412	0	0	8958	0	8558	9246	0	10224	11144	9070	8432	0	0	1080	0	496	0	0	358	314	7072	7830	0	8596	0	0	0	8956	0	3436	3414	2876	2748	2608	2702	3482	3510	3840	0
1012	130.02422	3.51	129.017	2966	3378	3452	4214	4034	4098	3662	3288	3498	1962	1638	1970	1980	1624	0	2500	2080	2232	0	0	932	0	0	0	0	0	0	0	0	1018	0	1232	0	1228	1418	0	500	0	0	470	0	0	514	374	0	194
1013	158.09242	3.51	157.085	204	220	204	244	0	262	206	0	0	246	184	358	312	302	264	248	352	200	59234	56268	52436	51338	49984	57000	51306	53998	54742	934	0	504	0	786	552	520	490	474	0	896	930	944	1158	1020	1178	1314	1108	186
1014	532.07042	3.52	531.063	0	0	0	0	0	0	0	0	0	236	266	254	176	0	0	0	336	294	0	0	0	0	0	0	0	0	0	0	0	0	0	0	0	0	0	0	0	0	0	0	0	0	0	0	0	0
1015	86.03436	3.55	85.0271	1638	1642	1514	1612	2182	1726	1840	1504	1874	0	0	996	0	0	0	0	1208	0	140	0	0	252	0	624	608	512	284	506	0	0	0	0	526	0	0	0	520	140	268	0	244	0	0	0	318	194
1016	126.02934	3.58	125.022	0	258	412	344	456	702	406	492	488	454	362	418	564	310	402	348	448	532	0	372	490	346	0	0	364	342	198	318	204	0	0	258	342	0	0	0	574	624	0	840	718	678	0	932	832	0
1017	208.02045	3.55	207.013	0	0	0	0	0	0	0	0	0	114	0	0	0	0	0	0	0	0	0	0	0	0	170	0	0	0	0	0	0	0	0	0	0	0	0	0	0	0	0	0	0	0	0	0	0	0
1018	97.96532	3.58	96.958	6298	4264	3192	2940	3384	3256	3198	3250	3428	4232	3728	6372	5350	4786	3892	4420	4850	5714	12318	13626	0	0	0	0	0	0	0	0	0	8158	6222	5742	6012	5348	5058	4512	6218	6734	0	0	17024	0	0	0	0	1690
1019	406.03477	3.61	405.027	0	0	0	0	0	0	0	0	0	428	392	0	0	0	0	0	0	0	0	0	0	0	0	0	0	0	0	0	0	0	0	0	0	0	0	0	0	0	0	0	0	0	0	0	0	0
1020	422.01094	3.67	421.004	0	0	0	0	0	0	0	0	0	0	0	0	260	0	0	434	514	522	0	0	0	0	0	0	0	0	0	268	0	198	0	0	0	0	0	0	0	0	0	0	0	200	0	0	0	0
1021	156.00729	3.69	155	2820	2534	2606	2846	3126	2824	2890	2316	2360	0	1636	1362	1908	1758	1842	2608	2474	2320	0	0	0	0	0	0	0	0	0	5462	5994	5286	6184	5086	5126	4078	4472	4068	1648	1710	1450	1440	1230	1318	1186	1382	0	268
1022	182.07810	3.68	181.071	2858	2630	2468	2596	2872	3008	2778	3242	3072	2198	2536	2734	2158	0	1932	2896	3274	3678	652	448	486	548	388	0	0	0	0	4184	5096	4574	5012	5626	5732	5950	6048	6614	0	0	0	0	552	564	556	0	798	0
1023	158.09229	3.72	157.085	212	0	0	88	190	0	0	0	0	194	236	0	146	222	0	152	540	176	0	0	0	0	0	0	0	0	0	0	0	0	790	0	718	0	0	510	0	0	1132	0	0	1088	0	0	0	276
1024	93.93414	3.69	92.9269	0	0	0	0	0	0	0	0	16192	10518	10876	10292	11930	10980	11528	11394	0	9284	1304	1346	1856	562	0	314	478	356	254	7292	0	8282	7996	9200	7954	0	9192	0	3712	3628	3256	3088	2858	2500	3488	3818	3428	0
1025	218.05418	3.71	217.047	0	18578	0	0	0	0	0	0	0	0	15520	16136	0	14546	0	0	0	24834	0	0	0	0	0	0	0	0	0	0	0	0	0	0	0	0	0	0	2854	3014	2958	2628	2508	2342	2468	3052	3066	0
1026	109.90717	3.72	108.9	0	0	0	0	0	0	0	0	20586	12292	12158	11516	17298	0	18630	0	10230	0	922	0	866	328	240	272	268	192	294	0	21564	0	20632	0	0	23170	23872	0	5986	5438	5084	4006	0	4444	5476	6290	5952	0
1027	192.02514	3.74	191.018	0	0	0	15604	0	0	0	0	0	0	0	0	0	0	0	0	0	0	0	8452	8072	6320	4796	3964	3536	2892	2336	1712	2118	1990	2518	2568	2478	2210	2184	2322	0	2734	2256	2880	2360	1646	2106	1854	2140	414
1028	130.02441	3.75	129.017	3128	2978	3052	3020	3304	3614	2738	2684	2976	1602	1546	1604	1402	1436	0	2422	2124	2344	0	1172	1580	1098	0	0	0	858	0	0	1210	0	0	0	1218	1282	1488	1532	496	624	532	548	0	0	0	0	864	308
1029	221.98195	3.73	220.975	0	0	324	0	0	688	482	274	260	344	504	332	368	304	388	584	322	560	486	320	0	0	1352	1384	1152	1216	1228	358	310	330	0	0	146	0	0	156	246	282	216	286	184	0	212	328	300	0
1030	208.02116	3.78	207.014	0	0	0	0	0	0	0	0	0	308	0	0	0	0	278	0	0	0	0	196	0	0	0	356	0	392	0	0	0	0	0	0	0	0	0	0	0	0	0	0	0	0	0	0	0	0
1031	406.03600	3.79	405.029	304	0	0	0	0	0	0	0	0	410	460	0	366	0	0	362	416	326	0	0	0	0	0	0	0	0	0	0	0	0	0	0	0	0	0	0	0	0	0	0	0	0	0	0	0	0
1032	136.03556	3.76	135.028	3126	4646	4486	4968	5386	4700	4612	4228	4500	1318	1582	1830	1324	1380	1096	1504	1418	1554	1618	1654	1822	1328	1242	1290	1436	1466	1236	4076	5498	5618	7678	8122	7352	7108	6618	6962	0	466	716	0	0	712	478	510	656	618
1033	112.01408	3.78	111.007	3496	3094	0	2740	3434	2508	2848	2524	2548	4022	3786	3852	2384	2414	2484	3480	3998	3480	2018	1570	1556	1192	1210	1056	0	0	0	0	0	0	1318	0	1088	0	1346	1342	1408	1276	0	1344	1492	0	1258	1518	0	0
1034	195.93361	3.79	194.926	202	80	0	116	76	0	0	64	84	0	228	324	108	70	100	250	276	110	0	0	0	0	0	0	0	0	0	0	310	354	138	200	206	152	170	264	226	152	534	776	0	1130	0	0	808	164
1035	422.00908	3.84	421.002	0	0	0	0	0	0	0	0	0	362	366	0	164	276	0	372	0	0	0	0	0	0	0	0	0	0	0	0	0	0	0	0	0	0	0	0	0	0	0	0	0	0	0	0	0	0
1036	93.93348	3.86	92.9262	16656	0	17376	17868	18680	0	16610	17444	0	10698	0	10634	0	12176	12222	0	10030	0	0	0	1182	0	336	166	0	0	182	0	0	9260	9554	0	0	0	9856	10180	3730	3746	4004	3224	2992	4362	3622	4074	4038	0
1037	86.03600	3.88	85.0287	1400	1160	1602	1508	1642	1770	1528	1610	2114	0	0	978	0	982	0	1378	1222	1204	0	576	0	718	0	608	0	316	386	474	0	502	0	0	516	0	642	880	0	292	304	372	396	400	244	0	0	318
1038	217.98757	3.91	216.98	0	0	0	0	0	0	0	0	0	6456	10724	9742	0	0	0	12582	0	16066	2148	0	7248	4066	3770	4198	3506	3682	3344	0	3598	0	6086	4694	4930	3824	4206	3716	4392	4362	2796	2994	2634	2266	1646	1870	1656	0
1039	182.07775	3.93	181.07	2656	2744	3018	3304	3254	3282	3470	3874	3428	2456	0	2758	2378	2422	2406	3666	3598	4342	0	554	484	326	0	0	0	0	0	4044	4652	4308	5300	5736	5248	6142	6100	0	0	0	0	0	0	548	658	950	890	0
1040	218.05455	3.95	217.047	0	0	22188	0	0	0	23214	0	0	0	16928	0	15936	15418	0	24592	25090	0	0	0	0	0	0	0	0	0	0	0	0	40300	0	0	0	0	0	0	2928	2542	2462	2278	2676	2474	3148	2860	2726	166
1041	130.02450	4.05	129.017	2880	2626	3060	3402	3318	2990	3018	3248	3562	1678	1612	1814	0	1546	1432	2528	2310	2316	0	1682	1534	0	1150	1054	1036	0	916	1098	0	1158	1210	0	1294	1360	1252	1618	384	714	652	0	380	604	0	0	518	178
1042	217.98715	4.14	216.98	0	147996	116406	84282	0	0	0	0	0	6166	0	13624	14006	0	0	14232	0	0	2474	0	6680	4628	4162	5034	4256	3496	3616	0	3740	0	5762	4720	4864	4546	4298	3954	4496	4724	3162	2684	2308	2498	1914	2054	1658	0
1043	112.01394	4.11	111.007	3410	2888	2720	2742	2824	2646	2604	2494	2904	3648	3668	3344	2308	2446	2934	2762	3292	3356	2114	1684	1810	1102	1058	1058	0	0	918	1134	1154	1088	1518	1284	1392	1368	1470	1544	1640	1420	1340	1450	1292	1508	1474	1574	0	388
1044	218.05473	4.11	217.047	0	0	0	24942	0	0	0	26870	0	17174	0	16374	0	0	15684	0	0	0	0	0	0	0	0	0	0	0	0	0	0	0	0	0	0	0	0	0	2580	2824	2324	2460	2656	2678	3210	3240	2872	0
1045	93.93291	4.11	92.9256	0	16622	0	0	0	0	0	0	16968	0	0	0	0	0	0	0	0	0	0	0	1216	0	0	0	0	0	0	0	0	0	10350	0	0	0	0	0	4250	4294	4468	0	3062	3224	3968	4790	4480	0
1046	192.02554	4.17	191.019	21016	0	16298	0	0	0	11770	10902	0	0	0	0	0	13238	14078	0	0	0	9742	8200	7468	5362	5354	4374	3196	3180	2550	1880	1800	1866	1872	2084	2000	2078	1980	2088	2356	2324	2668	1774	1844	1940	1656	1952	1862	232
1047	86.03470	4.19	85.0274	0	0	0	0	0	0	2090	1490	2302	0	0	0	0	0	0	1232	0	0	0	0	0	0	0	0	0	0	0	0	0	0	0	0	0	0	0	0	0	0	0	0	0	490	0	0	0	0
1048	182.07795	4.21	181.071	3442	3120	2840	3970	4390	3718	3398	3882	3460	2688	2906	2616	2374	2354	2276	3212	3150	3616	0	656	466	0	0	0	0	366	0	4638	4448	4784	5344	5240	5960	6838	6690	6310	0	0	1376	0	896	774	818	934	562	0
1049	495.99800	4.28	494.991	0	0	0	0	0	0	0	0	0	0	0	0	0	0	0	0	0	0	0	1400	0	0	0	0	0	0	238	0	0	0	0	0	0	0	0	0	0	0	0	0	0	0	0	0	0	0
1050	247.99755	4.28	246.99	0	0	9010	5866	4550	4944	5454	2602	2716	1334	3216	3440	3538	5260	5288	6082	5046	4354	1716	0	0	0	0	17658	0	12878	13256	1658	2182	3302	2820	2472	2226	1854	1764	2210	2650	2168	2440	2414	1986	2034	1570	1578	1628	702
1051	112.01381	4.31	111.007	3138	3172	3650	3152	2714	2504	3324	2222	2406	3084	3234	3578	2536	2594	2214	2972	2852	2624	2206	1848	1744	0	0	0	0	1128	0	0	0	1498	0	0	1330	0	1362	1542	0	1382	1230	1206	1426	0	1438	0	1552	0
1052	93.93283	4.33	92.9256	0	0	0	0	0	0	0	16960	0	10456	0	9950	11658	11282	11610	11700	10982	10780	1542	1062	0	0	282	240	302	170	310	8868	9388	9756	10124	10566	9944	10910	10528	11290	4182	4130	3720	3370	3096	2936	4108	4290	4488	0
1053	517.98134	4.34	516.974	0	0	0	0	0	0	0	0	0	0	0	0	0	0	0	0	0	0	0	0	166	0	0	0	0	0	0	0	0	0	0	0	0	0	0	0	0	0	0	0	0	0	0	0	0	0
1054	127.91022	4.34	126.903	1398	1630	1206	1426	1460	1506	1518	1636	1584	0	1454	1274	1320	0	1626	1838	1734	2018	0	0	1220	1280	0	0	1202	1028	0	1694	1948	2076	2704	2652	2294	2850	2304	2312	1348	1470	1430	1444	1658	1780	1352	0	1318	474
1055	99.96174	4.37	98.9545	0	514	558	274	440	344	520	0	0	428	332	0	0	576	502	0	0	0	1354	1348	1286	7688	7688	9124	9030	9160	0	1778	960	0	0	0	590	396	380	300	0	0	0	1398	1594	1536	1700	1320	0	208
1056	130.02444	4.42	129.017	3310	2848	3774	3832	3836	4470	3838	4520	4694	2024	2060	1842	1644	1568	1738	3090	2900	3242	0	1526	1630	0	1094	0	0	0	0	1292	0	0	1448	1404	1234	0	1308	1538	722	0	548	0	502	0	0	0	0	290
1057	86.03464	4.39	85.0274	1510	0	0	1804	2220	1604	1798	2258	2188	0	0	1038	0	0	0	1228	1506	1306	0	0	1070	0	696	690	0	828	496	514	0	0	0	602	0	0	0	0	472	0	0	0	0	0	460	712	0	254
1058	174.01437	4.41	173.007	3322	3310	3312	4010	3794	3712	3346	3632	3744	2404	2096	2170	2020	1776	1666	2232	2184	2238	1176	1102	1034	0	0	770	0	350	616	0	0	0	0	1300	0	1300	1250	1244	296	418	492	288	372	304	368	420	402	116
1059	182.07751	4.4	181.07	4168	3548	3186	3512	3888	3910	3174	3204	3312	2388	2750	2518	2550	2584	2406	2924	3886	3326	0	0	0	0	0	0	0	0	0	4834	4746	5454	6610	5926	5726	6328	6506	6618	1222	0	0	0	734	0	0	662	956	0
1060	318.06038	4.4	317.053	0	10134	9406	6848	5352	3726	3496	3726	3498	7168	6720	8066	5350	6024	5334	8370	8030	8984	11422	10188	10112	9204	0	0	8064	6806	7102	2908	2196	2136	2306	2096	2020	2082	1778	2448	3026	3266	3220	3660	3778	3420	3376	3658	3246	0
1061	95.93047	4.4	94.9232	11268	10394	11952	0	0	12234	11290	11684	0	7120	7386	6150	7286	7476	8326	7840	7870	7382	1258	0	0	432	190	106	238	0	152	5776	6632	6076	7072	7348	7594	7350	7312	8258	2906	3544	2560	2434	2410	2282	2806	3316	3002	0
1062	285.94529	4.4	284.938	0	0	0	0	0	0	0	0	0	0	0	0	0	0	0	0	0	0	352	0	0	776	0	396	806	0	744	0	0	0	0	0	0	0	0	0	0	448	0	0	414	340	0	302	318	0
1063	345.96610	4.43	344.959	0	0	0	0	0	0	0	0	0	0	0	0	0	0	0	0	0	0	0	0	420	1664	1846	1944	0	1514	1524	0	0	0	0	0	0	0	0	0	0	0	0	0	306	0	0	0	0	0
1064	97.96543	4.45	96.9582	6546	4428	3716	3474	3556	3130	3246	3502	3464	4446	4140	6112	5458	5756	4696	4732	4176	5546	0	13936	0	0	0	0	0	0	0	0	11362	0	6434	6314	5582	5320	4736	4580	6364	6700	0	0	0	0	0	0	0	1886
1065	156.00686	4.44	155	3650	3896	3344	3210	3624	3002	2970	2920	2584	1656	1660	1758	1840	1638	1446	2002	1888	1748	0	0	0	0	0	0	0	0	0	5794	5400	5380	4932	4590	4654	4118	3274	3140	1536	1564	1368	1614	1206	1384	1330	1280	0	308
1066	303.95582	4.45	302.949	0	0	0	0	0	0	0	0	0	0	0	0	0	0	0	0	0	0	0	0	0	304	392	0	0	0	0	0	0	0	0	0	0	0	0	0	0	0	0	0	0	0	0	0	0	0
1067	218.05444	4.49	217.047	29132	21120	0	0	27830	0	0	0	0	0	0	0	0	0	0	0	0	0	0	0	558	0	0	0	0	0	0	0	40600	0	0	0	0	0	0	0	2636	2488	2930	2116	2510	2388	2884	3054	2834	0
1068	527.18982	4.45	526.183	0	0	0	0	0	0	0	0	0	0	0	252	0	0	0	0	0	0	0	0	0	0	0	0	0	0	0	0	0	0	0	0	0	0	0	0	0	0	0	0	0	0	0	0	0	0
1069	380.10773	4.47	379.1	0	0	0	0	0	0	0	0	0	0	0	0	0	0	206	0	0	0	0	0	0	0	0	420	0	0	0	0	0	0	0	0	0	0	0	0	0	0	0	0	0	0	0	0	0	0
1070	208.02042	4.51	207.013	0	0	0	0	0	0	0	0	0	0	0	0	0	0	0	0	0	0	0	296	338	388	0	460	0	0	0	0	0	0	0	0	0	0	114	0	0	0	0	0	0	0	0	0	0	0
1071	136.03500	4.51	135.028	2766	3626	3968	3638	4158	4660	4130	4092	4442	1284	1344	1416	1224	0	1072	0	0	1516	1526	1538	1590	1366	1224	1330	0	1054	1172	3106	5078	4756	5622	6462	6398	5448	5634	6016	834	762	0	0	766	0	0	518	602	340
1072	367.94839	4.5	366.941	0	0	0	0	0	0	0	0	0	0	0	0	0	0	0	0	0	0	0	0	602	0	0	0	0	0	0	0	0	0	0	0	0	0	0	0	0	0	0	0	0	0	0	0	0	0
1073	127.91032	4.54	126.903	1472	0	1356	1490	0	1648	1764	0	1702	1390	0	1468	1288	1266	0	1774	1862	0	2040	1932	1378	0	1194	0	0	1116	1468	0	1792	1902	2070	2294	2104	1926	2118	2316	0	0	0	0	0	1520	1236	0	1270	0
1074	195.93327	4.56	194.926	158	0	178	94	0	172	124	0	78	100	122	0	102	0	0	0	208	172	0	0	0	18202	0	0	0	0	0	0	318	172	286	170	376	156	266	0	226	218	378	0	0	0	0	0	0	0
1075	517.97886	4.6	516.972	0	0	0	0	0	0	0	0	0	0	0	0	0	0	0	0	0	0	0	0	0	0	0	0	0	0	0	0	0	0	0	0	0	0	0	0	0	0	0	0	0	0	0	0	0	0
1076	247.99730	4.59	246.99	0	0	8186	5168	3922	4222	4640	2374	2652	1362	4158	3952	3894	5690	5452	0	5160	4266	1272	0	0	0	0	0	15866	0	13382	1776	2390	2870	2690	2404	2818	1914	2326	2010	3278	2552	2564	2920	2020	2028	1822	1560	1644	502
1077	495.99750	4.61	494.99	0	0	0	0	0	0	0	0	0	0	0	0	0	0	0	0	0	0	0	0	0	0	0	0	0	0	0	0	0	0	0	0	0	0	0	0	0	0	0	0	0	0	0	0	0	0
1078	542.16191	4.56	541.155	0	0	0	0	0	0	0	0	0	0	0	0	0	0	0	0	0	0	0	0	0	0	0	302	0	0	0	0	0	0	0	0	0	0	0	0	0	0	0	0	0	0	0	0	0	0
1079	221.98262	4.59	220.975	154	368	340	0	0	504	394	420	318	396	448	372	338	340	538	378	286	468	0	0	0	1358	1434	1442	1302	1230	1442	274	346	226	132	348	64	0	0	224	0	206	0	352	508	0	520	276	308	0
1080	86.03501	4.64	85.0277	1854	1700	1604	2462	2552	2258	2580	2640	2086	1058	950	0	856	0	0	1672	1738	1590	0	0	0	0	0	0	0	390	0	0	686	0	0	0	0	694	800	856	0	0	562	0	0	0	0	0	0	228
1081	97.96496	4.65	96.9577	6708	4302	3562	2954	2850	4126	3808	3440	3840	3874	4132	7190	5464	5162	4798	6128	4638	5494	12602	13402	0	0	0	0	0	0	0	0	11574	8594	6694	6226	6700	5708	4656	4546	7650	7466	16054	19012	0	0	0	0	21830	1736
1082	449.93170	4.68	448.924	0	0	0	0	0	0	0	0	0	0	0	0	0	0	0	0	0	0	0	0	0	0	0	0	0	0	0	0	0	0	0	0	0	0	0	0	0	0	0	0	0	0	0	0	0	0
1083	345.96702	4.67	344.96	0	0	0	0	0	0	0	0	0	0	0	0	0	0	0	0	0	0	0	1296	344	1542	1942	1634	1464	1470	1570	0	0	0	0	0	0	0	0	0	0	0	0	0	0	0	0	0	0	0
1084	130.02436	4.68	129.017	4100	3400	3630	4914	5010	4834	4938	5198	5344	2096	1944	1754	2010	2016	1958	3382	2962	3000	1414	1584	2026	0	914	0	0	0	0	0	1176	0	1372	1508	0	1726	1538	1492	0	0	0	0	0	0	1172	1152	0	402
1085	177.92247	4.66	176.915	0	0	0	0	0	0	0	0	0	0	0	0	0	0	0	0	0	0	0	404	0	604	0	0	618	0	0	0	0	0	0	0	0	0	0	0	0	0	0	0	0	0	0	0	0	0
1086	318.06178	4.67	317.055	12830	0	9460	7100	5136	3838	3418	2898	2890	5552	7042	7784	6002	5514	5750	8682	8436	8640	11690	10356	9888	10050	9098	9378	7696	7468	7278	2412	2206	2254	2636	2174	1772	1680	1862	1758	2840	3008	3422	3278	3442	3554	3112	3282	3582	0
1087	218.05459	4.7	217.047	0	20572	0	0	0	0	0	0	26472	16296	15548	0	15162	0	15084	0	0	0	0	0	0	0	426	0	0	0	0	0	0	42666	0	0	0	0	0	0	2448	2562	2518	2606	2402	2480	2952	3010	2650	196
1088	380.10810	4.72	379.101	0	0	0	0	0	0	0	0	0	0	0	0	0	0	0	0	0	0	0	0	0	0	0	0	0	0	0	178	0	0	0	0	0	0	0	0	0	0	0	0	0	0	0	0	0	0
1089	99.96150	4.71	98.9542	514	0	0	0	390	224	386	0	340	0	384	504	606	494	416	322	314	644	1092	1402	1688	8100	7870	8956	9522	9696	9948	2268	0	0	0	0	592	368	440	352	0	0	1154	1378	1406	1670	1948	1548	1570	168
1090	93.93293	4.73	92.9257	0	0	0	17006	17008	0	16386	17920	16282	10584	0	10018	0	10930	10790	0	0	10184	1254	982	0	344	320	278	262	226	226	7852	0	9784	10618	10940	10778	11172	10922	0	4330	4006	3618	3300	3108	2548	3810	4266	3826	0
1091	136.03529	4.75	135.028	2130	3878	4144	3528	4734	3776	3844	3672	4072	1014	1208	0	0	0	0	0	1174	0	0	1408	1604	0	0	1266	0	0	0	2670	5104	5390	5394	6174	6062	5770	5014	5390	0	0	0	0	0	0	0	0	0	0
1092	182.07722	4.76	181.07	3514	2896	3090	3146	3394	3808	3782	3234	3414	2328	3120	2374	2792	2682	2554	3924	3560	3732	620	0	0	0	0	0	0	0	0	5502	5698	5456	6176	6306	5660	6528	6886	6852	1162	0	982	1064	1036	1012	1052	0	904	260
1093	527.18890	4.76	526.182	0	0	0	0	0	0	0	0	0	0	0	0	0	0	0	0	0	0	0	0	0	0	0	0	0	0	0	0	0	0	0	0	0	0	0	0	0	0	0	0	0	0	0	0	0	0
1094	208.02051	4.78	207.013	0	0	0	0	0	0	0	0	0	0	0	0	0	0	0	0	0	0	312	246	286	0	0	0	0	0	0	0	0	0	0	0	0	0	0	0	0	0	0	0	0	0	0	0	0	0
1095	127.91003	4.79	126.903	0	1518	0	1658	1552	0	1646	1780	1706	1310	1472	0	0	0	1178	1822	1932	1826	1694	1394	1362	0	1326	0	1672	1366	0	1518	1704	1572	2112	2136	2172	1880	2242	2000	0	1364	1472	0	1512	1350	1382	1214	1338	0
1096	221.98208	4.81	220.975	0	0	280	0	0	646	0	270	424	0	0	472	482	310	0	522	428	534	0	0	0	1378	1524	1360	0	0	0	396	406	396	192	0	50	196	0	240	196	0	286	258	220	180	0	250	324	0
1097	367.94700	4.8	366.94	0	0	0	0	0	0	0	0	0	0	0	0	0	0	0	0	0	0	0	896	0	942	0	1062	1018	0	0	0	0	0	0	0	0	0	0	0	0	0	0	0	0	0	0	0	0	142
1098	229.98762	4.78	228.98	0	0	0	0	0	0	0	0	0	0	0	0	360	0	0	0	240	0	284	1108	3420	3056	3244	3266	3182	3274	2530	296	516	604	404	0	0	0	0	0	158	334	382	442	404	530	490	388	362	194
1099	542.15852	4.8	541.151	110	0	0	0	0	0	0	0	0	0	0	0	0	0	0	0	0	0	0	0	0	536	0	726	0	0	0	0	0	0	0	0	0	0	0	0	0	0	308	0	0	0	0	0	0	0
1100	267.81011	4.81	266.803	0	0	572	364	0	0	578	0	0	682	0	0	0	724	0	0	540	520	0	0	0	0	0	0	0	0	0	1514	880	0	506	686	0	484	410	0	146	204	350	0	312	526	0	0	0	24556
1101	86.03478	4.83	85.0275	2072	1742	1800	2238	2268	2248	2272	2410	2244	1140	0	0	994	0	0	1606	2016	1344	828	872	908	0	0	740	602	650	452	0	0	0	714	742	766	712	0	0	426	0	0	0	0	0	0	0	0	88
1102	247.99716	4.85	246.99	0	0	0	5058	3336	4048	4006	2526	2742	0	4550	0	4158	5736	5664	0	5204	4656	1620	0	0	0	0	0	0	0	0	2044	2628	2932	2746	0	2566	2202	1966	1880	2900	2556	2694	2494	2354	2096	0	1684	2020	0
1103	495.99830	4.87	494.991	0	0	0	0	0	0	200	0	0	0	0	0	0	0	0	0	0	0	0	0	124	0	0	0	0	0	162	0	0	0	0	0	0	0	0	0	256	0	0	172	0	0	0	0	0	0
1104	95.92977	4.86	94.9225	0	11416	11150	11452	12014	11832	11298	0	11178	7608	0	7160	7932	8124	7902	7494	6998	6730	0	0	0	0	202	126	168	130	184	4996	6448	0	6520	7110	7126	0	7058	7254	3032	2584	2600	2054	2178	1948	3054	2872	2518	0
1105	97.96500	4.89	96.9577	6976	4284	3690	2976	3432	2872	3268	3214	3640	3946	3720	6424	5416	5270	5214	4876	5280	5816	13304	14132	0	0	0	0	0	0	0	0	0	8998	6328	6430	6172	5390	4732	4940	7366	6914	14906	0	19938	0	0	23040	0	1954
1106	345.96627	4.94	344.959	0	0	0	0	0	0	0	0	0	0	0	0	0	0	0	0	0	0	0	0	254	0	1934	1308	1378	0	1564	0	0	0	0	0	0	0	0	184	0	0	0	0	0	0	0	0	0	0
1107	130.02435	4.92	129.017	3632	4400	3714	4966	5586	6354	5432	5662	5920	1940	2250	2096	2000	1778	2038	3420	2964	2996	1750	1790	1746	0	996	1072	0	0	936	0	1144	1424	1520	1456	1536	1444	1820	1442	1096	766	0	1166	0	1066	1130	1594	0	260
1108	218.05462	4.91	217.047	0	0	0	0	0	0	0	0	0	0	15442	0	0	0	0	22690	0	0	0	0	0	0	0	0	0	0	0	0	0	0	0	46564	0	52698	52926	0	2630	2494	2590	2348	2284	2548	3192	2870	3260	0
1109	192.02608	4.92	191.019	0	18090	15964	13502	0	9912	9834	9034	8768	0	17240	17404	0	12488	0	14210	0	0	10714	7854	7544	6290	4848	4470	3398	3558	2700	1748	1814	1626	1682	2074	1914	1748	2188	1718	2302	2244	2214	1768	1766	1706	1722	1724	1764	484
1110	449.93366	4.96	448.926	0	0	0	0	0	0	0	0	0	0	0	0	0	0	0	0	0	0	0	0	0	0	236	0	0	0	0	0	0	0	0	0	0	0	0	0	104	0	0	0	126	0	0	0	0	0
1111	156.00706	5	155	2664	3406	2974	2818	2762	2644	2802	2844	2546	1726	1548	1986	1852	1626	1700	1620	1862	2080	0	0	27376	0	0	29310	0	0	0	6934	6420	5782	5628	5308	5142	4394	3518	3538	2042	1678	1630	1618	1362	1392	1606	0	1308	158
1112	136.03558	5	135.028	2352	3566	3160	3422	3610	3986	4238	3354	3788	1206	1250	1306	1174	0	1206	1530	1268	1316	1410	1604	1990	1196	1208	0	1418	0	1058	2834	4802	4598	5232	5964	5944	4956	5224	5564	0	0	0	892	0	682	716	0	250	352
1113	217.98739	4.98	216.98	186	0	0	0	0	0	0	0	0	8522	18098	0	14474	18892	17354	0	21522	13014	3138	0	0	5170	5060	4866	5140	5278	4778	1544	3602	6476	6016	5120	5902	4354	5186	4046	6454	5278	3360	3090	3314	3024	2560	2072	2388	1018
1114	380.10827	4.98	379.101	0	0	0	0	0	0	0	0	0	266	0	0	236	0	0	0	0	0	0	0	0	0	0	0	420	466	0	0	0	228	0	0	0	160	0	0	0	0	0	0	0	0	0	0	0	0
1115	517.97982	4.99	516.973	0	0	0	0	0	0	0	0	0	0	0	0	0	0	0	0	0	0	0	0	166	0	0	0	0	0	0	0	0	0	0	0	142	0	0	0	0	0	0	0	0	0	0	0	0	0
1116	195.93291	4.99	194.926	0	0	132	0	180	0	0	56	0	66	0	198	0	0	198	114	100	0	496	300	528	0	0	0	0	0	0	0	378	236	162	248	142	262	156	150	84	198	0	0	964	0	0	0	0	184
1117	267.81084	5.02	266.804	0	0	0	0	0	0	0	0	0	0	0	0	0	0	0	0	0	0	0	0	0	0	0	0	0	0	0	0	0	0	0	0	0	0	0	376	224	0	0	0	0	0	0	0	0	0
1118	182.07745	5	181.07	2852	3034	3426	3278	3656	0	2956	2990	0	2740	2828	2604	2924	2632	2662	3300	3626	3738	0	0	0	0	0	0	0	0	0	6010	6294	6838	6816	0	0	7424	6824	0	0	0	0	0	0	0	0	638	0	318
1119	314.17059	5	313.163	0	0	0	0	0	0	0	0	0	328	0	270	178	0	308	356	0	0	17398	16978	0	0	0	0	0	8022	0	0	0	0	0	0	0	0	0	0	420	434	382	0	0	0	0	0	602	0
1120	527.18820	5.04	526.181	0	0	0	0	0	0	0	0	0	0	0	0	0	0	0	0	0	0	0	0	0	0	0	0	0	0	0	0	0	0	0	0	0	0	0	0	0	0	0	0	0	0	0	144	0	0
1121	542.16035	5.04	541.153	0	0	0	0	0	0	0	0	0	0	0	0	0	0	0	0	0	0	0	0	0	0	0	672	0	686	0	0	0	0	0	0	0	0	0	0	0	0	0	0	0	0	0	0	0	0
1122	662.18938	5.03	661.182	0	0	0	0	0	0	0	0	0	0	0	0	144	0	0	0	0	0	0	0	0	0	0	0	0	0	0	0	0	0	0	0	0	0	0	0	0	0	0	0	0	0	0	0	284	340
1123	183.05520	5.04	182.048	0	0	0	0	0	0	0	0	0	0	0	0	1884	1900	1736	2494	2350	2192	0	0	0	118	0	0	0	0	0	0	0	0	0	0	0	0	0	0	560	664	566	0	0	400	0	0	736	0
1124	95.92975	5.06	94.9225	11680	11140	11232	11326	0	11640	10956	0	11172	7050	7198	6934	7620	7772	7622	7860	6954	7046	0	0	0	286	188	228	178	168	208	4608	6172	6566	6494	7086	6740	0	7058	7238	2758	2792	2600	2152	2326	2168	2932	2654	3100	0
1125	495.99713	5.07	494.99	0	0	0	0	0	0	0	0	0	0	0	0	130	0	0	0	0	0	0	0	0	0	0	0	0	0	0	0	0	0	0	0	0	0	0	0	0	0	0	0	0	0	0	0	0	0
1126	367.94709	5.07	366.94	0	0	0	0	0	0	0	0	0	0	0	0	0	0	0	0	0	0	0	468	458	0	0	1128	0	0	0	0	0	0	0	0	0	0	0	0	0	150	0	0	0	0	0	0	0	0
1127	229.98721	5.09	228.98	0	0	0	0	0	0	0	0	0	0	0	0	0	0	346	0	0	0	0	1054	3536	3362	3296	3438	3088	2820	3016	0	0	502	0	266	0	0	0	0	258	320	252	326	416	550	392	642	760	0
1128	174.01479	5.09	173.008	3780	3600	3556	4354	5006	4870	4954	4898	5132	2276	2020	2900	2140	1846	2072	2616	2112	2612	1404	0	0	0	0	566	372	0	350	0	0	0	0	1212	1322	1534	1286	1480	284	392	0	0	370	380	402	518	458	0
1129	112.01402	5.11	111.007	3586	3228	2846	3482	3268	2494	2420	2604	2296	2776	2756	2988	2460	2334	2492	2540	3284	2692	2342	2002	1636	1366	1166	1050	1054	1264	806	1532	1518	1352	1614	1812	2172	1882	1762	1804	1222	1374	1902	1492	0	1296	1570	1814	1950	260
1130	182.07773	5.13	217.047	0	0	0	23738	25842	25436	0	27096	0	15566	14900	0	15952	15348	0	23446	0	0	574	0	0	0	0	0	0	0	0	39804	0	0	46248	0	0	0	0	0	2592	2652	2596	2378	2296	2496	3190	3084	2784	354
1131	93.93280	5.12	92.9255	0	15672	0	17216	17674	0	0	0	0	10616	11092	9710	11568	11040	0	10788	9476	8800	0	0	0	194	518	182	306	128	236	7140	0	8544	9736	9226	0	10724	10178	9648	4080	3984	3274	3024	2774	2408	3344	4210	3726	0
1132	247.99767	5.12	246.99	0	0	5826	4268	2832	3884	3760	2280	2544	1702	4866	5424	4346	5782	5788	7220	5484	4050	1448	0	0	17306	18172	0	0	13290	13308	2228	2528	3344	2526	2402	2406	2134	2056	1870	3468	2732	2536	2582	2170	2814	1894	1880	2136	734
1133	344.13188	5.19	343.125	0	0	0	0	0	0	0	0	0	0	0	90	204	0	0	0	0	0	0	0	0	0	0	0	0	0	0	0	0	0	0	0	0	0	0	0	0	0	0	0	0	0	0	0	0	0
1134	190.11924	5.2	189.112	1550	1284	1598	0	1946	1702	1504	1660	1438	2964	3186	2440	2246	2514	2184	2448	2926	2716	510	0	990	560	610	0	0	542	594	0	150	0	0	0	0	364	0	0	2638	2310	2232	2170	2344	2956	2424	2456	2356	3096
1135	390.13833	5.19	389.131	0	0	0	0	0	0	0	0	0	0	0	0	0	0	0	0	0	0	1096	1014	1056	696	0	0	0	0	574	196	0	0	0	0	0	0	0	0	720	0	0	0	0	0	576	0	536	422
1136	228.08364	5.19	227.076	306	552	448	518	346	586	478	530	538	0	0	0	0	0	0	794	526	0	0	0	0	0	0	0	0	0	0	744	0	0	0	778	752	1048	0	0	0	0	0	0	0	0	0	0	0	0
1137	176.10344	5.16	175.096	116	0	0	0	0	0	0	122	0	0	0	0	0	0	0	0	0	0	0	174	0	0	0	0	206	188	0	0	0	0	0	0	0	0	0	0	0	128	0	0	0	0	310	274	0	0
1138	195.93324	5.26	194.926	0	168	74	0	68	0	0	0	0	102	0	274	94	158	0	0	210	128	178	286	0	12082	15958	0	0	0	0	0	194	296	264	120	178	162	102	148	228	278	462	0	0	0	0	0	0	0
1139	267.81002	5.22	266.803	972	0	562	512	622	652	396	706	0	650	476	0	0	0	0	0	0	0	0	0	0	0	0	0	0	0	0	0	0	776	648	438	0	542	516	412	192	364	362	0	426	356	0	610	0	0
1140	86.03488	5.24	85.0276	1820	1484	1594	2166	2566	2250	2618	2826	1892	1104	0	1054	902	1024	1230	1448	1264	1262	0	0	0	0	696	0	536	608	518	724	0	784	0	0	0	0	730	0	0	0	882	0	1052	1010	958	862	888	224
1141	314.17258	5.21	313.165	0	0	0	0	0	0	0	0	126	0	0	0	286	318	254	282	178	280	18260	16512	17130	11404	12334	11648	10820	10590	11064	0	0	0	0	0	0	0	0	0	0	586	848	700	546	520	662	950	876	300
1142	156.00637	5.27	154.999	3194	3030	3574	3408	2778	2608	2260	2798	2600	1630	1668	1574	1778	0	1696	1848	2046	0	0	0	0	0	0	0	0	0	0	0	6742	5746	5958	6054	4780	4108	3834	3606	2016	1828	1704	0	0	0	0	0	0	174
1143	527.18898	5.24	526.182	0	0	0	0	0	0	0	0	0	0	0	0	0	0	0	0	0	0	0	0	0	0	0	0	0	0	0	0	0	0	0	0	0	0	0	0	0	0	0	0	0	0	0	0	0	0
1144	662.19117	5.26	661.184	0	0	0	0	0	0	0	0	0	0	0	0	0	0	0	0	0	0	0	0	0	0	0	0	0	0	0	0	0	0	0	0	0	0	0	0	0	0	0	0	0	0	0	0	0	228
1145	130.02455	5.33	129.017	3202	3654	3874	5048	5604	5516	5106	5988	5122	2062	1870	1970	1872	1806	2018	2790	2292	1904	1644	0	2002	852	940	1138	696	0	0	1300	0	1110	1836	1506	1474	1356	1622	1508	0	1022	1498	1816	1626	1610	1670	1482	1444	292
1146	174.01431	5.34	173.007	4296	3868	3694	4950	5362	4806	5084	4352	4194	2778	2134	2274	1966	1890	1896	2654	2180	1720	1456	0	1236	0	0	518	806	0	402	0	948	1046	1190	1062	0	1672	1418	1528	364	366	500	416	294	456	594	404	454	90
1147	127.90959	5.33	126.902	1492	0	1304	1342	1448	1560	1696	1726	1470	0	1518	0	0	1312	1194	1676	2064	0	1412	1416	0	1652	1450	0	1236	1478	0	1792	1826	1512	2040	2470	2158	2218	2334	2210	0	1148	0	1694	0	0	0	0	0	0
1148	345.96584	5.3	344.959	0	0	0	0	0	0	0	0	0	0	0	0	0	0	0	0	0	0	0	0	424	1472	1442	1358	1382	0	1310	0	162	0	0	0	0	0	0	0	0	0	0	0	232	0	0	0	0	0
1149	176.10332	5.32	175.096	286	0	0	150	0	126	144	298	56	212	114	182	0	0	64	62	118	122	0	0	1436	1070	216	980	980	1006	202	0	0	222	0	0	80	0	168	0	0	186	0	0	196	314	348	246	254	0
1150	318.06260	5.35	317.055	0	0	0	7946	5304	4136	3472	3206	3382	6230	6564	7158	6382	5762	6116	0	8790	8660	10266	9512	10194	9038	9444	9114	0	7540	6642	2918	3034	2498	2482	2344	1924	2074	2166	1928	2760	3288	2826	3852	3362	3310	3406	3224	3252	1382
1151	228.08293	5.39	227.076	532	0	0	0	0	546	738	464	0	0	0	0	0	0	0	0	0	0	0	0	0	0	0	0	0	0	0	0	0	0	0	0	0	0	0	0	0	0	0	0	0	0	0	0	0	0
1152	517.97874	5.38	516.971	0	0	0	0	0	0	0	0	0	0	0	0	0	300	0	0	0	0	0	458	0	0	0	0	0	0	0	0	0	0	0	0	0	0	0	0	0	0	0	0	0	0	0	0	0	0
1153	183.05567	5.36	182.048	0	0	0	0	0	0	0	0	0	0	1094	1078	1760	1632	1748	2032	2188	1980	0	244	224	0	0	0	0	0	0	0	0	0	0	0	0	0	0	0	0	258	0	402	672	510	802	0	0	0
1154	112.01376	5.37	111.006	3604	3460	3090	2784	3054	2676	2674	2266	2510	2728	2804	2658	2150	2190	2494	2648	3206	3138	2040	1958	1832	1406	0	1174	762	1030	0	1622	1590	1488	0	1902	1708	1878	1936	1870	0	1482	1470	1208	1514	1450	0	1756	1852	290
1155	218.05415	5.39	217.047	0	0	0	0	24840	0	0	0	0	0	14838	0	0	0	0	0	0	0	0	0	0	0	0	0	0	0	0	0	0	0	0	0	47620	0	0	52346	2430	2442	2594	2302	2180	2530	2646	2950	2572	0
1156	136.03489	5.42	135.028	2392	3070	3142	3444	3400	3386	3766	3764	3690	0	1346	1188	1064	0	0	1388	0	1284	0	1422	1554	1276	1042	0	1172	1162	1052	3150	4302	4422	5368	5486	6182	4996	4950	5192	870	0	0	0	748	0	536	498	0	0
1157	232.00295	5.4	230.996	1914	0	34950	0	0	33958	32868	0	0	2124	0	0	0	0	0	0	0	0	4542	6228	3596	3416	2980	3006	2826	2818	2254	1038	1894	3406	3170	2414	2120	1560	0	1488	2138	1700	2034	2078	1776	1730	0	1692	1456	590
1158	217.98758	5.4	216.98	204	0	0	0	0	0	0	0	0	8366	22004	20004	0	0	17566	20986	0	11670	3622	0	7954	5258	5504	5326	5326	5434	4944	1706	3820	6374	4986	6342	0	5390	4812	4662	6574	6144	4006	4464	3096	3494	2772	2574	2404	0
1159	95.93016	5.44	94.9229	10988	10064	0	0	11532	11554	10648	0	11614	8202	7478	6642	7142	6954	7424	6734	6036	6402	0	0	0	0	114	226	146	134	126	4414	5646	6030	5936	0	6104	6904	6670	6496	2486	2518	2588	1740	2174	1954	2448	2394	2400	27618
1160	182.07783	5.49	181.071	3434	3616	3550	3738	3552	3180	3310	3518	3420	2802	2910	2970	2930	2746	2678	4214	4380	4158	664	718	0	0	0	0	0	0	412	7588	6676	0	7350	8608	8480	8450	7954	8772	1226	1052	1106	1082	0	0	1262	0	0	0
1161	527.18809	5.45	526.181	0	0	0	0	0	0	0	0	0	0	0	0	0	0	0	0	0	0	0	0	0	532	0	0	638	0	0	0	0	0	0	0	0	0	0	0	0	0	0	0	0	0	0	0	0	0
1162	247.99761	5.48	246.99	1050	7394	4580	3758	2894	2572	3442	2278	0	1720	0	5484	4254	5408	5102	6984	5538	3960	1600	0	0	17236	0	0	0	0	0	2210	2636	2942	2908	2652	2448	2346	2392	2600	3620	2976	2478	2502	2274	2122	2266	2048	1930	0
1163	190.11908	5.47	189.112	2480	2648	2400	2622	2584	2362	2874	2584	2748	4262	4618	4246	3748	2878	4010	4510	4002	2858	1136	988	378	902	0	892	706	912	586	1384	1082	1240	1346	1374	1448	1368	1526	1766	4442	3298	3978	4938	4346	4534	5050	5772	4646	5386
1164	495.99857	5.46	494.991	0	0	0	0	0	0	0	0	0	116	0	0	246	0	0	0	324	0	0	206	0	238	0	162	0	0	0	0	0	0	0	360	0	0	0	0	86	0	0	0	0	0	0	0	0	0
1165	390.13763	5.45	389.13	0	0	0	0	0	0	0	0	0	0	0	0	0	0	0	0	0	0	0	0	0	0	0	0	0	802	0	0	0	0	0	0	0	234	0	0	0	0	0	0	0	0	992	0	0	0
1166	156.00745	5.53	155	3480	3648	0	2792	3134	2292	2638	2578	2360	1746	1622	1726	1430	1614	1732	1780	1828	1720	0	24408	0	0	0	0	0	0	0	7602	7044	6228	6018	6378	5198	4292	3948	3888	1848	2000	1404	1958	1524	1480	0	1456	0	290
1167	97.96492	5.51	96.9576	7186	4506	3558	2954	3496	3052	3634	3158	3358	4738	3872	6946	5572	5976	4534	4544	4948	5976	11924	0	21936	0	0	0	0	0	0	0	12852	8954	6380	7372	6564	5322	4984	5172	7094	7522	15238	0	0	24190	0	0	0	2054
1168	228.08434	5.56	227.077	580	442	518	0	694	498	534	566	720	0	556	328	374	636	484	514	598	658	0	0	0	0	0	0	0	0	0	974	970	0	1010	976	1166	0	0	1158	0	0	0	0	0	0	0	0	0	0
1169	86.03642	5.52	85.0291	1726	1932	1716	2432	2578	2626	2118	1468	1840	1062	0	0	0	984	0	0	0	0	0	0	0	0	518	558	0	286	404	0	0	0	0	0	742	0	0	0	1076	0	0	1020	0	0	0	0	0	0
1170	267.81045	5.57	266.803	0	0	496	660	502	426	738	0	0	434	0	0	0	0	532	456	0	0	0	0	0	0	0	0	0	0	0	1378	0	0	0	434	0	0	420	400	278	262	224	518	254	342	0	0	682	0
1171	662.19614	5.59	661.189	0	0	0	0	0	0	0	0	0	0	0	0	0	0	0	0	0	116	0	0	0	0	0	0	0	0	344	0	0	0	0	0	0	0	0	0	0	0	0	0	0	222	0	0	0	0
1172	130.02408	5.59	129.017	3588	3590	4342	5400	4220	5460	3872	3596	3418	1766	1780	1796	1566	0	1468	1886	2406	1988	0	1436	1442	0	0	1012	0	0	0	1626	1098	0	1208	1562	1406	0	1428	1532	1414	1488	0	1530	0	1566	1778	1752	0	198
1173	93.93277	5.61	92.9255	0	0	0	0	0	17414	0	16092	16580	10866	10262	10060	10334	10744	0	10084	9388	8354	0	0	0	210	258	258	184	94	144	0	8020	8412	9332	0	9258	9458	9314	0	4142	3228	2942	2796	2930	2358	3110	3288	3070	0
1174	127.91026	5.66	126.903	1226	0	0	0	0	1254	1516	0	0	0	1210	1284	0	926	1178	1888	0	1430	1514	1524	1758	0	1566	1406	1610	0	1290	1536	1484	1554	1966	0	2264	2566	2334	1898	0	0	1008	0	0	0	0	0	0	0
1175	232.00358	5.66	230.996	1702	0	0	29340	30074	0	0	0	0	2184	0	0	0	0	0	0	0	82116	4290	5940	4560	3200	3160	3348	3260	2690	2448	0	1974	2974	2996	2388	2124	1800	1976	1512	2312	1842	1682	1838	2098	1694	1712	0	1450	0
1176	112.01426	5.69	111.007	3162	3040	2918	2968	2446	2634	2762	2446	2450	2558	2736	2450	2192	2698	2566	2350	2606	2818	2016	1970	1798	1372	1516	1192	0	0	0	1494	0	1538	1598	1800	1830	1862	1996	1942	0	1264	1346	0	1676	1532	1934	1742	2070	160
1177	174.01592	5.74	173.008	4346	4774	3850	4506	4334	4664	3722	3184	3928	2136	1782	1808	1740	1500	1676	1946	1950	1736	1342	1210	0	0	986	748	0	452	320	1524	1206	1212	1248	1300	1456	1908	1444	1508	460	442	558	816	472	538	256	560	528	0
1178	190.11919	5.73	189.112	2678	2472	0	0	0	0	0	0	0	4584	0	1836	0	3590	2120	0	2730	4342	0	218	174	144	0	128	366	0	0	0	0	0	0	1334	218	214	0	210	3660	4406	3216	0	3240	2850	0	0	3410	5166
1179	344.13174	5.73	343.124	0	0	0	0	0	0	0	154	0	0	0	256	0	0	246	0	0	0	0	0	0	0	0	0	0	0	0	0	0	0	0	0	0	0	0	0	0	0	0	586	0	0	0	0	0	0
1180	229.98711	5.72	228.98	0	0	0	0	0	0	0	0	0	212	0	0	0	0	0	0	0	228	220	0	3862	3468	3048	3130	2860	2486	2384	662	442	406	396	0	0	0	0	0	228	0	308	604	304	544	488	350	482	0
1181	183.05565	5.77	182.048	0	0	0	0	0	0	0	0	0	1262	1060	1384	1530	1796	1852	2116	2436	2078	120	0	0	0	224	0	0	104	0	0	0	0	0	0	0	0	0	0	360	440	610	548	504	528	0	0	570	0
1182	318.06191	5.75	317.055	0	13808	12642	7870	5388	4128	3616	2996	3082	6152	6142	7016	5888	5980	5902	7974	8462	9412	9538	10112	9366	9044	9176	8542	7260	6986	7178	3538	2560	2502	2554	2368	2272	2122	2050	1828	2902	2886	2932	2922	3248	3216	3542	3280	3192	1356
1183	182.07778	5.75	181.071	3452	3176	3908	3280	3264	4604	0	3744	3430	2942	2800	3022	2560	2506	2714	4288	3912	4324	0	0	0	0	0	0	0	0	0	0	6832	0	7718	7622	0	0	0	0	0	0	0	0	0	0	0	0	0	0
1184	144.11303	5.76	143.106	268	502	0	178	100	328	106	456	358	154	0	274	744	124	80	368	548	0	154	158	232	166	118	0	0	0	0	564	442	168	0	90	144	0	568	0	256	132	570	116	0	1068	786	882	1118	204
1185	195.93364	5.82	194.926	0	104	0	0	0	0	130	0	154	0	0	132	0	0	100	220	218	246	378	532	494	10526	13224	0	0	0	0	950	298	298	0	0	148	188	194	200	110	124	424	662	0	666	0	0	0	0
1186	127.90979	5.83	126.903	0	0	0	0	0	0	0	0	0	0	0	0	0	0	0	0	0	0	0	0	0	0	0	0	0	0	0	1592	1592	1920	0	0	0	0	0	0	0	0	0	0	0	0	0	0	0	0
1187	95.92969	5.81	94.9224	10306	0	9986	0	0	0	9828	0	0	7294	6806	6308	7356	6500	6916	6796	6708	6138	0	0	0	0	244	0	0	248	0	4716	5812	5794	6348	6302	5996	7384	6492	7070	2316	2502	2560	2132	1816	1702	2254	2302	2116	0
1188	188.10342	5.82	187.096	318	0	208	0	0	240	320	172	352	0	336	0	222	300	0	0	286	220	460	0	0	0	1222	0	0	0	0	0	282	302	136	0	0	0	476	0	488	0	0	0	1272	0	0	0	1386	0
1189	146.09199	5.85	145.085	0	448	0	362	222	0	468	770	354	588	490	438	232	574	420	514	408	378	0	304	300	320	0	486	460	250	312	220	172	204	160	0	0	214	0	264	260	0	160	0	0	512	0	230	256	0
1190	517.98013	5.88	516.973	0	0	0	0	0	0	0	0	0	0	0	0	0	0	0	0	0	0	0	246	0	0	0	0	0	0	0	0	0	0	0	0	0	0	0	0	0	0	0	0	0	0	0	0	0	0
1191	662.19497	5.87	661.188	0	0	0	0	0	0	0	0	0	0	0	0	0	0	0	0	0	0	0	0	488	0	0	0	256	0	496	142	0	0	230	0	0	0	0	0	0	0	0	0	0	0	0	0	0	0
1192	390.13845	5.92	389.131	0	0	0	0	238	0	0	0	0	0	0	0	0	0	0	0	0	0	0	1132	0	628	818	0	924	788	0	274	0	0	352	0	0	0	0	0	1152	780	0	0	888	956	0	1164	0	0
1193	344.13289	5.91	343.126	0	0	134	0	0	0	0	0	0	0	264	0	242	266	414	0	0	228	0	0	0	0	0	0	0	0	0	0	0	0	0	0	0	0	0	0	0	0	0	0	444	0	0	0	0	0
1194	190.11944	5.91	189.112	0	0	0	0	0	0	0	0	0	306	0	0	0	0	202	0	0	420	0	0	0	0	322	196	0	0	0	0	0	0	0	216	0	0	0	0	0	0	0	0	0	1680	0	0	0	1216
1195	97.96523	5.92	96.958	6750	3538	3786	3036	3328	2736	3066	3480	3956	4228	4324	6484	4950	5156	4538	4656	5110	5178	11540	12744	0	0	0	0	0	0	0	0	12564	9434	6914	7018	6802	5454	4908	4876	7100	7282	0	18064	0	0	0	0	0	1884
1196	182.07783	5.96	217.048	0	0	0	23458	0	0	0	0	0	14614	0	0	13956	0	13782	0	0	0	0	0	0	0	0	0	0	0	0	0	0	0	0	0	0	0	0	0	2574	2510	2196	2056	2050	1946	2278	2080	2504	234
1197	156.00742	5.96	155	3192	3070	3368	2836	2860	2820	2886	2628	2610	0	2052	2022	1920	1666	0	1590	1608	1996	0	0	0	0	0	0	0	0	0	7488	0	6860	6522	5652	4554	4210	3784	3472	2190	1904	1992	0	1584	1632	0	0	1324	0
1198	217.91522	5.98	216.908	0	0	0	0	0	0	0	0	0	0	0	0	0	0	0	0	0	0	0	0	240	3198	3176	3814	4152	4172	4168	0	192	0	0	0	0	0	188	0	0	0	216	474	538	0	0	0	620	0
1199	127.91019	6	126.903	1344	1074	1140	0	1270	0	1202	1176	1252	0	0	988	1090	0	1074	1474	1350	1352	1316	1748	1722	1282	0	1352	1238	1240	1190	1358	1518	1536	1972	1910	2028	0	1684	1568	1278	0	1080	1232	1166	0	1228	962	1142	458
1200	370.01452	6	369.007	0	0	0	0	0	0	0	0	0	0	0	0	0	0	0	0	0	0	0	0	214	0	0	0	0	0	0	0	0	0	0	0	0	0	0	0	0	0	0	0	0	0	0	0	0	0
1201	380.11048	6.02	379.103	0	0	0	0	0	0	0	0	0	0	0	0	0	0	0	0	0	0	0	0	0	0	0	0	0	0	0	0	0	0	0	170	0	0	0	0	0	0	0	0	0	0	0	0	0	0
1202	247.99840	6.03	246.991	0	5450	3900	3140	2362	2796	3088	2482	2252	1834	5748	6382	3782	4636	5220	6604	5476	4172	1546	0	0	0	0	0	0	0	0	2924	3408	3432	2956	3254	3180	2700	3008	3286	3772	2866	2614	2794	2510	2444	2102	2292	1776	0
1203	95.92980	6.04	94.9225	10074	0	9992	0	12250	10318	9828	9800	10120	6620	6450	6326	7404	6456	6756	5866	5738	5436	0	0	794	182	216	268	234	124	68	4554	5502	5702	5888	6180	5418	6238	6466	6380	2486	2436	2314	1910	1860	2050	2458	2262	2234	25002
1204	228.08396	6.04	227.077	0	0	0	460	510	600	430	558	736	518	490	466	534	402	572	716	452	578	0	0	0	0	0	0	0	0	0	0	1008	1084	0	1008	1182	1246	0	1098	0	0	0	0	0	0	0	0	0	0
1205	144.11268	6.06	143.105	582	0	450	638	528	396	318	0	280	454	458	476	130	506	356	204	122	472	0	0	200	160	262	168	0	82	164	0	0	506	448	540	644	468	0	534	842	824	266	896	718	290	0	202	0	258
1206	232.00293	6.08	230.996	1798	35362	0	0	0	0	0	0	0	2800	0	0	75052	100302	98394	0	98358	0	4892	6802	3908	3126	3462	3548	3012	2860	2712	0	1846	2358	2656	2184	1926	1748	1686	1734	2632	2456	1980	1850	2034	1730	1674	1978	1632	0
1207	192.02593	6.06	191.019	0	16102	14310	0	0	8696	8804	8014	7342	12708	0	0	9716	9856	0	0	13064	12508	8786	0	7694	5978	5060	3964	3366	3182	2360	1938	1666	1570	1738	1918	1942	1628	1800	1720	1970	2232	1892	1638	1680	1706	1340	1396	1290	562
1208	195.93292	6.07	194.926	0	0	0	0	82	0	78	0	126	0	94	160	0	128	0	78	210	220	288	198	0	0	10454	10818	10824	13732	0	0	0	136	0	52	0	150	176	0	0	68	0	0	0	0	0	526	522	0
1209	146.09233	6.1	145.085	0	428	398	366	358	630	522	938	0	362	0	594	0	480	0	0	0	546	464	3264	2932	3552	3784	3572	3734	3286	3390	442	0	206	258	372	344	204	200	0	432	342	498	192	0	288	344	0	0	344
1210	344.13164	6.11	343.124	0	0	0	0	0	0	0	0	0	0	0	0	0	0	0	0	0	220	0	0	0	0	0	0	0	0	0	0	0	0	0	0	0	0	0	0	0	0	0	0	0	0	0	0	0	0
1211	156.00757	6.13	155	2656	2908	2908	2818	2860	2678	3270	2500	2518	1670	1674	1616	1772	1790	1558	1758	1802	2094	0	0	0	0	0	0	0	0	0	8356	6778	6460	6278	5810	5082	4172	3984	3846	2062	1606	1884	1796	1666	1596	1522	1312	1402	332
1212	662.18951	6.15	661.182	0	0	0	0	0	0	0	0	0	0	0	0	0	0	0	0	0	0	0	0	0	0	0	0	0	0	0	0	0	0	0	0	0	0	0	194	0	0	0	0	0	0	0	0	0	0
1213	182.07775	6.15	181.07	4050	3440	3504	3848	4500	4452	3808	4042	3822	3336	2688	3040	2588	2562	3044	4082	4196	4380	0	0	0	0	0	0	0	0	0	8534	7416	7278	7902	7752	8430	8524	8800	9054	1336	1112	0	1080	1110	1202	1164	0	1290	286
1214	93.93282	6.16	92.9255	0	0	0	0	0	0	15260	14444	14920	10466	9724	9268	10830	9476	9904	9480	8652	8412	1088	0	828	364	204	416	278	114	118	6790	0	8010	8312	8208	8806	9046	9006	9230	3658	3554	3074	2542	2258	2460	2766	3414	3092	0
1215	188.10343	6.18	187.096	410	0	0	490	0	828	0	610	0	0	0	0	0	0	0	0	0	0	0	0	0	0	0	0	0	0	0	0	0	0	0	0	0	0	0	0	0	0	1372	0	1324	1702	0	0	1438	0
1216	127.90996	6.19	126.903	0	0	0	0	0	0	0	0	0	0	0	0	970	892	0	0	0	0	1424	1534	0	0	0	1334	1270	0	0	1120	0	0	1842	1500	0	1700	0	1500	0	0	0	0	1006	0	0	0	0	0
1217	144.11313	6.23	143.106	152	154	218	0	114	300	192	0	0	454	310	292	0	88	162	0	0	0	370	412	180	362	0	118	110	182	80	0	0	0	0	160	0	0	80	0	158	276	0	0	248	0	0	186	332	128
1218	176.10307	6.2	175.096	580	604	630	698	0	638	698	648	668	1336	1226	986	1198	1356	1354	0	0	1462	1224	768	0	698	490	0	550	368	436	0	0	0	0	264	786	0	310	632	0	0	1616	1682	1830	1602	1588	2040	1606	1112
1219	172.10834	6.24	171.101	0	0	612	472	416	414	614	448	378	530	766	618	554	508	460	720	504	600	6018	7758	8034	7402	7748	8200	7424	7792	7954	564	404	274	360	402	476	388	416	306	1710	1178	1442	1618	1732	2126	1548	1836	1880	660
1220	205.98718	6.2	204.98	0	0	510	670	0	396	758	904	1118	1042	0	1026	1288	0	1544	1202	0	1418	966	0	0	0	1718	0	0	0	0	2032	1544	1378	1422	1614	1490	1492	1390	1612	0	0	0	0	0	0	886	0	1070	104
1221	183.05607	6.23	182.049	0	0	0	0	0	0	0	0	0	1248	1078	0	1872	1752	1716	2132	2084	2222	0	150	0	0	0	0	0	0	0	0	0	0	0	0	0	0	0	0	588	484	502	394	496	0	496	520	562	0
1222	380.10795	6.25	379.101	0	0	0	0	0	0	0	0	0	0	0	0	0	0	0	0	0	0	0	0	0	0	0	0	0	0	696	0	0	0	0	0	0	0	0	0	0	0	0	0	0	0	0	0	0	0
1223	130.02419	6.23	129.017	2854	2364	2658	2164	2660	2180	2406	2996	2874	0	1308	0	0	0	1416	1898	1840	2166	1512	1746	1180	0	0	0	0	582	0	1624	0	0	0	1546	1706	1904	1546	0	1524	2018	1634	1964	1716	1596	1782	1900	2010	374
1224	217.91625	6.25	216.909	0	0	0	0	0	0	0	0	0	0	0	0	88	0	0	0	0	0	188	132	282	2900	3450	2772	3754	3488	3572	1018	252	0	162	0	0	218	0	0	0	0	358	548	434	0	810	526	764	0
1225	370.01365	6.29	369.006	0	0	0	0	0	0	0	0	0	0	0	0	0	0	0	0	0	0	0	116	0	0	0	0	0	0	0	0	0	0	0	0	0	0	0	0	280	0	0	0	0	0	0	0	0	0
1226	220.05233	6.32	219.045	9150	0	7808	9110	9272	9316	0	9304	8846	4654	4894	4258	4784	4404	4888	6602	7598	6784	0	0	0	0	0	0	0	0	0	12374	14176	13630	0	15186	16048	0	16518	0	0	1284	1018	0	1126	520	1152	1292	1218	0
1227	344.13221	6.29	343.125	0	0	0	0	0	0	0	0	0	0	0	0	198	0	0	0	0	0	0	0	0	0	0	0	0	0	0	0	0	0	0	0	318	0	0	0	432	0	0	0	0	724	0	0	0	0
1228	174.01475	6.31	173.007	3170	3094	2824	3238	3000	3094	3472	3128	3266	1952	2262	2274	1440	1652	0	1774	1970	2128	1524	1402	0	0	0	0	0	538	696	1432	1210	1142	1598	1914	1690	1824	1772	1544	392	522	488	0	434	0	0	0	0	100
1229	198.01561	6.31	197.008	548	0	660	0	0	0	768	608	0	388	226	244	0	334	0	258	348	0	0	400	328	460	0	0	0	238	0	296	400	0	412	0	560	380	426	260	376	0	474	582	342	468	520	642	526	0
1230	97.96474	6.32	96.9575	5946	4160	3466	3270	2830	2436	3052	3080	3774	4380	4246	6612	5272	5680	4626	5278	4774	6128	12948	14342	22144	144048	152590	162600	160664	174792	181558	0	0	9188	6442	7198	6402	5508	4988	4972	7986	7386	17430	19664	22168	26438	0	25522	23836	2014
1231	324.04689	6.3	323.04	682	376	382	584	528	722	680	396	330	0	322	0	402	272	516	452	358	354	496	0	0	0	0	0	0	0	0	0	300	0	450	384	0	308	432	294	676	738	530	0	702	702	868	1090	818	258
1232	188.10347	6.35	187.096	11588	10582	11066	10882	11250	11350	12120	11480	12102	29062	28398	28348	25720	25560	26678	23718	23706	24016	121968	129270	127718	105936	110328	107352	96856	103276	101706	9954	11310	11042	11648	14188	13216	14542	12742	14126	86658	82864	86786	77984	76574	80744	95500	92714	92168	32324
1233	146.09218	6.38	145.085	3722	3772	3910	4354	4314	4386	3856	3818	3848	5296	5326	5310	5704	2364	5390	5352	5902	5276	3898	2588	3660	3822	2964	2450	0	0	1606	4304	4676	4358	5416	4658	5744	5336	5294	6592	9700	10322	9918	11568	11134	10952	12422	13414	13024	7576
1234	112.01393	6.38	111.007	3242	2728	3046	2978	2652	2356	2234	2166	2164	2402	2772	2208	2094	2040	1862	2572	2582	2436	2060	1668	2058	1236	1250	0	0	1088	0	1354	1502	1396	1618	1342	1502	1494	1824	1306	1172	1422	1490	1610	1496	1768	1956	1868	1918	228
1235	130.02485	6.42	129.018	2748	1854	2032	2408	2870	2646	2042	2482	2842	1144	1198	1166	1282	1100	0	1808	1912	1830	1802	1442	0	0	684	562	696	338	0	1372	1344	1336	1372	1754	1488	1666	1470	2158	1490	1550	1612	1242	0	0	1654	1330	0	406
1236	205.98747	6.42	204.98	628	0	774	0	726	0	0	0	0	0	0	0	0	0	0	0	0	1448	0	0	0	0	0	0	0	0	0	1958	1700	1248	1896	1554	1826	1546	1968	1884	0	0	0	0	0	0	0	0	0	108
1237	324.04843	6.47	323.041	418	334	0	464	372	0	0	662	0	0	0	364	0	340	476	466	330	686	0	0	0	0	0	0	0	0	0	0	0	0	0	404	0	320	0	408	574	560	0	774	720	786	0	0	0	0
1238	144.11308	6.49	143.106	0	0	202	270	0	0	310	412	176	0	0	0	0	0	80	0	0	98	0	0	196	0	0	190	322	224	0	0	176	0	0	232	222	174	0	0	0	238	0	0	206	0	158	0	0	192
1239	174.01424	6.52	173.007	3248	3594	3116	2838	3380	2954	2810	3200	4032	1894	1754	1726	1564	1518	0	1772	1918	2010	1366	1348	1208	0	0	0	574	0	526	1602	1432	1168	0	1578	1488	1830	1554	1414	0	416	0	520	0	782	0	0	0	0
1240	229.98707	6.53	228.98	0	0	0	0	0	0	0	0	0	0	0	0	220	276	280	0	0	296	390	1560	5186	2778	3252	2832	2992	2244	2142	836	502	490	340	0	0	0	0	0	0	248	512	562	0	626	1022	462	504	258
1241	662.18884	6.56	661.182	0	0	0	0	0	0	0	0	0	0	0	0	0	0	0	0	0	0	0	0	0	0	0	0	0	0	0	0	0	0	0	0	0	0	0	0	0	0	0	0	0	0	0	0	0	0
1242	93.93292	6.56	92.9256	13768	13806	0	14566	0	0	13636	14472	14186	10654	0	10146	10504	0	10236	8952	8754	8056	0	1068	0	198	330	146	194	258	164	5758	7170	7726	7836	8208	8348	0	9340	9630	3532	3432	3256	2800	2780	2314	2826	2912	3458	0
1243	232.00308	6.58	230.996	2320	0	0	0	0	0	0	0	18702	2790	0	76864	0	0	0	113068	0	0	5964	6230	4310	3960	3452	3274	3314	2940	2700	1336	1828	2398	2294	2408	2010	2268	1848	1928	2586	2666	2038	1972	1966	2202	2030	1954	2060	774
1244	188.10368	6.58	187.096	0	0	3430	0	1498	1714	3308	2662	0	0	0	0	0	4896	2664	1756	0	2770	0	0	0	0	0	0	0	0	0	2092	0	0	3966	0	3412	2664	3046	2706	0	0	0	0	13706	0	0	0	0	0
1245	380.10942	6.64	379.102	0	0	0	0	0	0	0	0	0	0	0	0	0	0	0	0	0	0	0	0	0	0	0	0	0	0	0	0	0	0	0	0	0	0	0	0	0	0	0	0	0	0	0	0	0	0
1246	79.92401	6.64	78.9167	0	0	0	0	0	0	0	0	624	0	412	372	0	0	0	386	0	0	0	0	0	0	0	0	0	0	0	0	0	0	0	0	0	0	0	0	0	698	0	0	366	0	0	0	506	0
1247	198.01586	6.64	197.009	522	456	584	746	818	0	532	668	718	290	158	230	166	276	260	232	420	0	270	0	262	366	200	224	0	216	0	238	296	326	388	200	436	236	312	0	366	336	486	502	466	286	326	466	846	0
1248	247.99867	6.64	246.991	0	4164	3422	2708	2500	2326	2858	1974	2018	1898	5156	6052	3544	4148	4242	5456	4362	3174	1726	0	0	0	0	0	0	0	0	3466	3562	4016	4268	3850	3796	3828	3374	4294	4078	3504	2816	2842	2586	2582	2110	2474	2412	728
1249	176.10379	6.66	175.097	428	630	280	524	0	694	682	466	608	0	0	340	0	0	682	750	0	0	0	360	0	184	226	0	0	0	0	0	424	0	836	620	496	604	576	0	1792	1490	1358	1614	1696	0	1634	1146	1382	0
1250	146.09233	6.65	145.085	2856	1094	3198	1312	0	4180	3914	0	1866	3872	0	2174	0	4662	1010	0	0	0	0	0	0	482	428	0	442	492	0	0	3406	0	0	3138	5336	3914	0	0	0	0	0	0	0	0	5404	1454	2354	0
1251	160.10815	6.67	159.101	216	96	104	402	0	120	204	162	0	0	0	0	96	0	58	0	198	236	0	226	102	246	408	238	0	0	0	166	72	100	0	0	0	0	0	0	0	0	0	0	0	188	0	0	2794	150
1252	99.96124	6.68	98.954	0	364	588	206	194	320	456	452	342	370	478	362	524	672	424	0	626	0	1106	1078	1516	7608	7548	7916	8152	8628	9888	2202	1332	0	566	770	688	596	0	582	0	762	1274	1280	0	1862	1472	1558	1744	158
1253	130.02476	6.7	129.017	2388	1792	1872	2172	2284	2432	2354	2294	2574	1356	0	0	1390	1324	1166	1702	2178	1798	0	1286	0	600	0	708	0	494	0	1486	1368	1254	1668	1808	1602	1810	1572	1626	0	0	0	0	0	0	1006	0	0	330
1254	205.98708	6.73	204.98	466	474	0	0	0	0	0	0	0	0	0	0	1620	1226	1670	0	0	1992	0	0	856	1734	0	0	0	0	0	2064	0	1280	1604	1842	1756	1718	1598	2006	0	0	880	0	0	948	0	0	0	0
1255	174.01428	6.7	173.007	3176	3192	2496	3052	3000	3270	3108	2836	3470	1610	1980	0	1662	1484	0	0	2026	1742	0	0	0	0	0	0	730	634	466	1390	0	0	1714	0	1462	1510	1398	0	0	618	0	0	0	0	834	0	0	158
1256	97.96489	6.72	96.9576	0	4676	3056	2754	2656	3298	3172	3798	3838	3678	3530	6428	5112	5272	4546	4600	4646	5770	11350	13082	0	0	0	0	0	0	0	32438	13294	10176	6690	5954	6890	5532	4924	5372	7686	7470	0	0	0	0	0	0	0	1892
1257	267.81100	6.77	266.804	1132	802	744	500	552	462	556	428	766	0	0	0	0	682	0	0	538	576	0	0	0	0	0	0	0	0	0	0	0	744	640	538	572	586	598	582	304	230	314	346	396	508	416	0	0	12126
1258	180.07641	6.79	179.069	0	0	0	0	0	0	0	0	0	0	0	174	74	0	236	0	0	0	6630	9288	10532	9278	8058	9496	8842	8284	10030	0	194	0	0	274	308	0	588	358	548	654	572	590	598	746	588	898	0	172
1259	79.92388	6.82	78.9166	0	0	0	894	0	584	0	672	0	0	364	0	258	0	202	412	0	0	0	0	0	560	0	684	388	0	478	516	0	0	0	0	0	0	0	0	0	0	0	630	0	0	0	0	598	0
1260	232.00292	6.81	230.996	1790	0	0	0	0	0	0	0	11948	3144	80478	0	0	0	0	0	0	0	6054	6360	4100	3890	3290	3148	3812	2828	2564	1260	1620	2150	2212	2000	1854	1960	1766	1840	2762	2130	1964	2102	2302	1874	2068	0	2020	0
1261	283.89957	6.82	282.892	0	0	0	224	0	180	0	0	184	0	0	0	0	0	0	0	0	0	0	0	0	0	0	0	0	0	0	194	0	0	230	158	326	354	368	358	0	0	0	0	0	0	0	0	0	0
1262	318.06214	6.83	317.055	0	15654	12886	7938	5748	4230	3616	3846	3688	4844	5582	6390	5352	5730	6280	8186	8332	0	9578	9390	8882	8868	8792	7858	7104	6686	6088	3130	2822	2900	2414	2250	2704	1992	1996	2160	2682	2898	3570	3440	3516	3120	3416	3478	2872	1394
1263	244.13085	6.87	243.124	134	284	310	226	0	0	266	0	0	0	0	4010	0	2784	0	0	0	4984	0	0	0	0	0	0	0	0	0	408	0	0	0	0	2950	0	0	0	0	0	0	2214	1560	0	0	0	0	0
1264	160.10809	6.86	159.101	858	816	708	1014	952	944	922	906	602	1256	1118	1458	1194	940	924	1248	1106	906	1244	1230	1402	1196	1414	1260	1100	1332	1412	884	1120	1276	1262	1182	1016	1240	968	948	2356	2496	2478	2542	2360	2736	3266	2982	3448	2320
1265	333.05071	6.88	332.043	0	0	0	0	136	0	0	238	0	146	172	0	246	378	0	194	0	0	0	1302	3122	4330	3982	5254	10338	0	11318	168	140	0	0	0	348	0	0	0	74	0	0	0	214	0	0	0	0	0
1266	86.03485	6.89	85.0276	1242	1174	1144	1086	1124	0	1146	1246	0	0	758	0	604	588	706	0	0	0	0	728	546	352	254	350	204	334	264	0	698	678	840	812	856	0	0	0	0	0	0	0	408	444	472	450	532	284
1267	146.09281	6.92	145.086	0	0	0	0	0	0	0	0	0	0	0	0	0	378	0	0	0	0	0	0	0	220	0	0	0	0	0	0	0	366	0	0	0	0	0	0	0	0	0	0	0	0	0	0	0	0
1268	176.10361	6.93	175.096	454	314	718	154	0	274	372	504	0	0	516	636	164	562	0	0	552	566	220	0	0	0	0	0	0	0	0	0	0	212	108	0	0	100	0	194	284	0	198	208	142	430	424	134	0	88
1269	192.02579	6.93	191.019	14622	14414	10408	10488	8360	7698	7136	6258	6672	0	10856	9580	7882	7542	7484	0	0	12010	8088	6420	5846	5016	4548	3400	3588	2680	2278	1716	1792	1616	1824	1738	1598	1554	1466	1578	1874	1698	1702	1852	1702	1432	1462	1100	1590	532
1270	218.05500	6.96	217.048	0	0	0	0	0	0	23326	0	0	13520	0	0	13250	13526	12868	0	20556	0	466	0	0	0	0	0	0	0	0	0	0	0	0	0	46032	0	0	0	2412	2462	2094	1944	2084	1984	2438	2494	2582	0
1271	97.96505	7.01	96.9578	6096	3656	3980	3002	2956	2828	3062	2846	3050	4258	3886	6334	4750	5030	4162	4476	4350	5790	11272	0	20550	0	0	0	0	0	0	0	13040	9102	8162	6668	6254	5450	5134	5110	7494	7410	16100	19350	19786	25116	26324	0	0	2140
1272	267.81243	7.01	266.805	0	0	0	0	408	0	382	0	0	0	0	0	718	0	0	0	0	0	0	0	0	0	0	0	0	0	0	1456	0	0	0	0	0	0	638	0	338	168	0	214	302	346	464	0	0	11550
1273	79.92388	7.02	78.9166	0	0	0	0	0	650	0	0	770	446	0	390	514	0	404	0	0	424	0	782	0	602	0	0	350	0	0	542	0	484	0	0	0	0	0	0	0	0	0	508	552	0	476	0	0	530
1274	160.10849	7.03	159.101	0	0	0	0	0	386	260	0	0	0	0	0	0	0	0	346	432	0	0	0	0	0	0	624	0	0	490	0	0	0	0	0	0	0	272	248	0	0	560	0	1324	3128	0	2230	3186	0
1275	283.89867	7.05	282.891	0	0	0	0	0	238	0	252	252	0	0	0	0	0	0	0	0	0	0	0	0	0	0	0	0	0	0	0	298	312	220	198	0	264	0	362	0	0	0	0	0	0	0	0	0	0
1276	342.20385	7.05	341.197	264	372	438	246	326	336	520	514	478	1538	1184	1200	1734	1474	1790	1768	1496	1912	19540	18088	18962	13054	13526	13910	11982	11384	0	1686	1340	1514	1968	1600	1524	1546	1480	1604	4708	4356	4578	5248	5244	4690	5662	5724	5528	400
1277	205.98724	7.09	204.98	334	300	696	694	0	656	0	948	0	1054	1078	0	0	1594	1700	1954	2286	2236	0	0	0	0	2094	1996	0	0	0	1694	1720	1556	1624	1950	1806	1786	1622	1956	784	806	0	0	0	1010	0	0	1124	0
1278	295.76807	7.05	294.761	0	0	0	0	0	0	0	0	0	0	0	0	0	0	0	0	0	0	0	0	0	0	0	0	0	0	0	0	0	0	0	0	0	0	0	0	0	0	0	0	0	0	0	0	0	0
1279	360.21473	7.07	359.207	0	112	142	0	242	0	168	336	212	248	486	462	494	0	584	526	620	566	16456	16390	15148	10414	11410	10656	0	9050	9058	678	662	346	770	586	584	322	486	0	1898	1684	1854	1798	1936	1766	2120	2380	2616	960
1280	318.06372	7.09	317.056	17072	15100	11972	8478	5338	4134	3962	3242	3718	5624	5338	6238	4896	5402	6348	8264	8452	9142	9394	8876	8666	8544	8478	8040	6594	5864	5942	2832	2924	3038	2532	2498	2268	2368	2280	2046	3902	4184	3694	4156	4084	4174	4108	3820	4392	0
1281	244.13037	7.05	243.123	1862	1440	1586	1686	1788	2026	1542	1850	2292	4328	3916	4696	5672	5066	5310	4972	5296	4924	14732	14700	14416	10926	12006	11110	9780	9586	10414	2442	2810	2964	2880	3090	2834	3052	2834	3196	33374	33722	33662	34536	34466	35524	36778	34820	35688	4686
1282	172.10801	7.09	171.101	0	0	0	320	270	416	264	324	0	348	344	0	348	0	0	216	0	356	1488	2024	0	0	1250	1826	0	0	1430	272	0	0	222	0	0	0	0	300	576	3468	0	3582	4182	0	4666	0	0	0
1283	200.10393	7.1	199.097	264	294	162	324	240	270	276	394	306	556	552	324	604	654	572	544	534	680	6742	7298	6462	5216	6044	5064	5106	4468	4876	380	222	310	436	332	628	492	354	250	11572	11932	11554	13354	13554	13786	13794	13806	13626	518
1284	171.85035	7.14	170.843	0	0	0	0	0	0	0	0	0	0	0	0	0	0	0	0	0	0	0	0	0	0	0	0	0	0	0	0	0	0	0	0	0	0	0	0	0	0	0	0	0	0	0	0	0	0
1285	146.09247	7.14	145.085	0	0	0	0	374	718	0	0	574	0	0	0	0	566	430	0	562	478	736	452	424	490	232	688	244	276	360	304	238	436	220	0	0	292	0	362	560	0	580	0	388	746	610	638	0	538
1286	247.99802	7.15	246.991	0	2922	2052	2356	2144	2102	2136	2190	2186	2256	4276	4204	2860	3040	3346	0	4052	2404	1820	0	0	0	0	0	0	0	0	4432	4476	4254	4716	5426	5004	5504	4920	5060	3576	2968	3528	2974	2944	3150	2438	2292	2090	0
1287	99.96166	7.15	98.9544	360	316	526	158	246	160	262	278	422	416	354	506	522	500	386	522	666	0	0	0	1346	6434	7412	7362	8402	8382	9988	2064	0	0	636	0	704	0	424	554	0	558	1318	1402	1358	1490	1740	1550	0	222
1288	86.03438	7.21	85.0271	0	0	942	1260	0	1206	0	0	0	0	0	0	0	0	584	0	842	0	0	0	0	264	460	0	652	386	276	0	0	0	0	0	0	0	0	0	242	0	658	0	0	314	0	240	0	0
1289	215.84132	7.21	214.834	0	0	0	0	0	0	0	0	0	0	0	0	0	0	0	0	0	0	0	0	0	0	0	0	0	0	0	0	0	0	0	0	0	0	0	0	0	0	0	0	0	0	0	0	0	0
1290	112.01368	7.22	111.006	2718	2584	2820	2140	2302	2134	1970	2100	2136	2266	1672	1684	1600	1696	1580	2386	3014	2610	1938	1406	0	1168	0	1208	878	0	0	0	0	1210	1482	1548	0	1506	1696	1864	0	1176	1598	1720	1756	1792	2418	1970	2544	158
1291	342.20261	7.25	341.195	0	0	0	520	498	398	396	0	348	1272	1142	0	1810	1670	1776	1780	1676	0	0	0	0	0	0	0	0	10908	11876	1410	0	0	1512	0	1588	0	0	0	5430	4346	5272	5436	5222	5244	5654	5924	5998	0
1292	333.05076	7.25	332.043	172	0	208	88	152	0	0	158	0	302	0	0	0	120	0	0	0	256	0	1382	3668	5010	5426	7720	10892	11350	10878	0	0	124	0	0	154	0	0	0	0	142	0	180	218	0	0	0	0	0
1293	174.01505	7.29	173.007	2856	3084	3212	2712	3162	2860	2736	2630	2710	0	1554	0	1462	1198	0	1540	0	2006	1160	0	0	890	0	0	0	336	560	1322	0	1174	0	1248	1320	1652	0	1564	664	778	0	610	0	0	0	996	0	0
1294	217.83917	7.26	216.832	0	0	0	0	0	0	0	0	0	0	0	0	0	0	0	0	0	0	0	0	0	0	0	0	0	0	0	0	0	0	0	0	0	0	0	0	0	0	0	0	0	128	0	0	0	0
1295	130.02459	7.27	129.017	1926	2016	1838	1912	2134	2464	2314	2298	2350	1240	0	1304	0	0	1160	1252	0	1752	0	0	0	0	602	0	0	0	442	1162	0	0	1372	0	1178	1250	1226	1274	0	0	0	0	0	0	0	0	0	204
1296	172.10845	7.28	171.101	1246	1192	0	0	0	1056	916	918	0	1476	1488	1812	996	0	1184	1318	1140	1438	1742	2392	2294	2104	2230	2370	2208	1924	2178	0	0	988	1104	962	1254	902	1120	1078	0	3154	3838	3988	4350	0	4686	0	4386	2634
1297	218.11465	7.3	217.107	0	0	0	0	0	0	0	0	0	0	0	0	0	0	0	0	0	0	626	480	412	212	0	342	312	294	260	0	0	0	0	0	0	0	0	0	508	670	0	884	550	766	974	728	0	186
1298	198.01579	7.33	197.009	550	490	382	578	762	0	528	800	968	480	206	326	256	330	206	474	372	444	428	248	0	390	322	0	290	0	214	370	312	308	224	424	450	370	446	324	208	446	356	408	362	440	578	578	638	180
1299	283.89835	7.32	282.891	0	0	0	0	0	0	0	0	0	0	0	0	0	0	0	0	0	142	0	0	0	0	0	0	0	0	0	0	328	662	0	478	316	318	0	260	0	0	0	0	0	0	0	0	0	0
1300	129.89723	7.33	128.89	5334	0	7628	10212	12918	12226	11900	0	10154	3374	3490	2972	4514	4576	5258	2014	1772	1510	0	0	0	246	56	158	0	86	0	2446	3174	3166	3826	3794	4512	4158	3986	4580	0	0	0	524	578	408	0	0	0	3424
1301	99.96207	7.38	98.9548	508	388	166	116	174	242	236	244	370	486	284	0	428	322	386	0	0	642	0	0	1412	0	6680	0	7800	8082	9064	2066	0	0	0	618	586	0	0	586	0	894	1434	1300	1418	1566	1494	1484	1724	138
1302	295.76677	7.4	294.759	0	0	0	0	0	0	0	0	0	0	0	0	0	0	0	0	0	0	0	0	0	0	0	0	0	0	0	0	0	0	0	0	0	0	0	0	0	0	0	0	0	0	0	0	0	0
1303	215.84112	7.41	214.834	0	0	0	0	0	0	0	0	0	0	0	0	0	0	0	0	0	0	0	0	0	0	0	0	0	0	0	0	0	0	0	0	0	0	0	0	0	0	0	0	0	0	0	0	0	966
1304	218.05441	7.42	217.047	0	0	24118	0	0	0	0	0	24136	0	13018	13242	13228	12748	13994	0	0	0	0	0	0	0	0	0	0	0	0	0	0	38352	0	0	0	0	0	0	2502	2096	2194	2120	2030	1906	2232	2674	2610	0
1305	97.96484	7.42	96.9576	6492	3650	2668	2698	2808	3232	2850	3126	3138	3564	3762	0	4830	4102	4876	4526	4716	5826	9862	11054	0	0	0	0	0	0	0	0	0	9182	7514	6584	6642	5632	4896	4930	7770	7958	0	0	0	0	0	0	0	1868
1306	247.99734	7.47	246.99	0	2650	1876	2262	2250	1876	2230	2502	2084	2368	4038	4008	1882	2336	2404	3924	3680	2568	1994	0	0	0	0	0	0	0	0	5266	4556	4916	5436	5504	5100	5752	5318	7138	3816	3104	2798	2984	2716	2700	2292	2322	2436	1086
1307	86.03488	7.47	85.0276	1002	0	0	1044	1042	1078	1020	0	1024	548	0	674	0	542	444	0	0	872	522	526	0	348	226	284	0	268	246	0	0	408	0	0	552	764	0	0	302	346	0	436	522	270	0	244	388	202
1308	171.85037	7.46	170.843	0	0	0	0	0	0	0	0	0	0	0	0	0	0	0	0	0	0	0	0	0	0	0	0	0	0	0	0	0	0	0	0	0	0	0	0	0	0	0	0	0	0	0	0	0	0
1309	93.93392	7.47	92.9266	15690	0	0	0	0	15640	0	0	0	14704	0	0	0	0	0	0	8568	0	1018	0	0	0	290	230	158	146	0	0	6688	6706	6976	7728	7558	7764	7926	7866	3234	3018	2774	2740	2438	2498	3286	2940	3382	0
1310	360.21376	7.44	359.206	244	144	0	0	94	242	186	0	0	394	354	0	482	558	550	0	0	534	0	0	13450	10896	0	0	8880	8656	9188	632	230	586	400	330	384	554	0	522	1746	1690	1678	1790	1812	1788	1946	1960	0	942
1311	518.14582	7.45	517.139	0	0	0	0	0	0	0	0	0	0	0	0	0	0	0	0	0	0	0	0	0	0	0	0	0	0	0	0	0	0	0	0	0	0	0	0	0	0	0	0	496	0	0	0	0	0
1312	174.01491	7.47	173.008	2916	2898	2308	2528	2478	3316	2802	2706	3000	1726	1342	1568	1330	0	1154	1706	1678	1862	1196	0	0	0	0	898	0	524	422	1304	1286	0	0	1216	1306	1462	1638	1554	480	630	0	0	0	0	0	832	746	114
1313	192.02532	7.46	191.018	0	12158	10188	9422	6840	6444	5884	5878	5448	8428	8740	8758	6828	7026	6934	8704	10392	9946	6504	5366	4894	4828	3690	3604	2698	2502	2028	1398	1410	1660	1760	1464	1638	1456	1556	1280	1636	1784	1652	1496	1616	1310	1380	0	1476	482
1314	130.02521	7.53	129.018	1580	1728	1764	1832	2102	2238	2106	2110	2020	1126	1114	0	1140	0	0	1186	1512	1556	928	0	0	626	702	450	0	652	494	1048	0	1164	0	1166	1060	1264	1098	1250	610	0	0	0	0	0	418	0	0	314
1315	217.83893	7.53	216.832	0	0	0	0	0	0	0	0	0	0	0	0	0	0	0	0	0	0	0	0	0	0	0	0	0	0	0	0	0	0	0	0	0	0	0	0	0	0	0	0	0	0	0	0	0	0
1316	232.00326	7.55	230.996	0	0	0	0	9558	0	0	7132	6048	2670	0	0	0	0	0	0	0	0	6532	5312	3634	3490	3376	3278	3084	3002	2890	1492	2038	1840	1850	1864	1896	1694	1682	1768	3000	2392	2434	2014	2068	2026	2010	2374	2014	972
1317	215.84049	7.61	214.833	0	0	0	0	0	0	0	0	0	0	0	0	0	0	0	0	0	0	0	0	0	0	0	0	0	0	0	0	0	0	0	0	0	0	0	0	0	0	0	0	0	0	0	0	0	0
1318	112.01374	7.58	111.006	2310	2370	1932	2220	2344	2062	1942	1998	1968	2074	2326	2076	1430	1604	1454	2258	2260	2438	1696	0	1428	1430	1028	0	768	0	762	0	1320	0	1572	1442	1416	1586	1830	1576	1274	1346	1532	1730	1774	1586	1912	2168	2100	202
1319	172.10861	7.61	171.101	0	0	1048	996	1034	0	0	0	1022	0	0	0	0	1304	0	0	0	0	1694	1706	1316	0	0	0	0	0	1608	1286	1096	976	0	0	0	0	0	0	4162	0	0	2752	0	4586	0	4588	3170	0
1320	156.00831	7.65	155.001	2542	2338	2476	0	2162	2372	2402	2436	2320	0	2034	1536	0	0	0	1542	1704	1572	0	0	0	0	0	0	0	0	0	8078	0	5754	5346	5728	4510	3824	3534	3428	2182	0	1902	0	2122	0	1632	0	0	190
1321	218.05417	7.68	217.047	0	0	0	0	24092	0	0	21582	0	0	0	0	13048	12746	0	0	0	20562	0	0	0	0	0	0	0	0	0	0	0	0	0	0	0	0	0	0	2244	2138	1986	1830	2184	2164	2576	2500	2590	0
1322	198.01479	7.67	197.008	312	440	658	754	886	0	912	908	0	324	532	340	284	310	306	344	520	594	226	126	0	130	130	232	0	138	222	266	0	302	312	202	386	292	0	394	0	244	120	420	368	550	450	504	0	120
1323	129.89744	7.68	128.89	4120	5180	4936	8206	8828	9220	9094	12766	11940	3480	2954	2898	3740	3700	4420	2690	2214	2342	1088	0	0	254	214	150	68	148	182	3946	5732	4304	5042	5186	5822	6282	6306	6534	1458	1498	0	0	0	554	0	0	0	3488
1324	518.14695	7.69	517.14	0	0	0	0	0	0	0	0	0	210	0	0	0	0	0	0	0	0	0	0	0	0	0	504	0	0	474	320	0	0	0	0	0	0	0	0	0	0	0	0	0	644	0	0	0	0
1325	97.96514	7.73	96.9579	5626	3540	2816	2372	2604	2588	2912	2948	2770	3466	3554	5518	4392	4538	4426	4862	4562	5482	9832	11308	17548	0	0	0	0	0	0	0	0	9000	6884	6098	6504	5438	5102	4688	6366	7150	0	0	0	0	0	0	0	2294
1326	93.93295	7.72	92.9257	15210	17690	18744	0	0	0	0	0	14494	15686	13930	0	13386	0	0	9054	8560	8732	0	0	0	390	312	200	196	192	350	4968	5770	6078	6400	6452	7740	7116	7658	7288	3898	3164	3756	2826	2582	3118	2976	2806	2710	0
1327	172.10818	7.76	171.101	958	0	934	0	0	0	512	770	664	1458	1222	1404	1278	1228	1168	1194	928	1094	1094	1570	1748	1650	1512	1544	1384	1402	1480	0	1168	970	1174	1182	980	1018	908	948	2424	2466	2438	2056	2468	3074	3458	3350	3386	1794
1328	283.89967	7.77	282.892	0	0	0	0	252	0	112	0	82	0	0	0	0	0	0	0	0	0	0	0	0	0	0	0	0	0	0	0	246	226	0	306	334	300	172	214	0	0	0	0	0	0	0	0	0	0
1329	200.10352	7.83	199.096	212	400	570	480	462	296	408	490	522	684	668	658	466	0	536	162	592	770	2080	2236	2134	1792	1682	2144	1770	1666	1826	378	462	488	406	420	422	400	548	432	2246	2426	2446	2856	2626	2294	2618	3036	3034	588
1330	156.00701	7.83	155	2872	2460	2638	2530	2346	2128	1906	2204	2562	1266	0	1466	1670	1382	0	1604	1760	1790	0	0	0	14578	15816	15308	0	0	0	7246	0	5836	6044	5440	4710	3840	3450	3298	2172	1912	1820	2066	1782	1532	1434	1598	0	224
1331	99.96196	7.83	98.9547	446	208	334	162	146	264	334	404	284	262	254	528	346	306	272	620	0	558	930	942	1478	5592	6512	7158	5622	0	7690	1920	1096	0	552	0	450	0	758	0	724	0	1192	1440	1298	1468	1594	1596	0	222
1332	174.01545	7.83	173.008	2644	2388	2552	2898	2878	2914	2696	2572	3060	0	1518	1526	1284	1280	0	1532	1638	1910	0	988	0	870	658	0	512	0	396	1290	1244	0	1004	0	1028	1258	1444	1244	0	300	0	0	0	0	0	0	0	0
1333	130.02453	7.87	129.017	1936	1842	0	1914	1940	2174	1730	1678	2074	990	0	0	0	1022	0	1382	1122	1358	0	0	0	0	492	0	704	348	496	0	958	0	1140	1192	1026	0	1124	0	384	0	608	0	0	0	0	0	0	204
1334	86.03462	7.89	85.0273	0	908	0	0	898	0	992	0	0	0	0	562	0	0	0	0	0	0	298	278	316	252	294	258	0	360	240	482	344	0	358	0	426	248	400	0	316	206	318	0	430	374	242	284	0	188
1335	218.11401	7.87	217.107	0	0	0	0	0	0	0	0	0	0	0	0	0	0	0	0	0	0	0	450	0	0	300	0	0	0	0	0	0	0	0	0	0	0	0	0	382	0	284	342	0	644	160	316	412	226
1336	232.00293	7.86	230.996	1492	0	0	0	8158	0	0	5440	4700	2702	0	0	0	0	39232	0	0	0	6970	5070	3484	3610	3566	3594	3540	3084	3088	1404	1844	1744	2128	2012	1952	0	2090	2016	2640	2196	2190	2376	2038	2698	1962	2008	1686	0
1337	95.93004	7.9	94.9228	11016	12270	13208	12730	0	12330	11740	10618	0	12148	9708	10888	0	11150	10424	6962	6006	5218	1008	0	0	492	0	324	260	216	174	3208	4106	4718	4372	4848	4486	4564	5362	4972	2686	2536	2290	2380	1870	1660	2228	2082	2406	0
1338	218.05503	7.9	217.048	0	0	0	0	0	0	0	0	0	0	0	0	0	0	0	0	0	0	0	0	0	0	0	0	0	0	0	0	0	0	0	0	0	0	0	0	1952	0	2680	2148	1960	1842	2714	2820	2338	0
1339	229.98742	7.9	228.98	0	0	0	0	0	0	0	0	0	0	0	0	312	122	0	0	0	204	490	0	4312	2224	2246	2118	1384	1826	2068	0	740	556	496	0	0	0	0	0	252	366	254	656	326	700	526	0	596	326
1340	217.98729	7.91	216.98	358	16152	0	0	11156	0	0	10778	10848	0	7406	6992	4664	3998	3846	5318	5580	4962	4410	0	5794	4562	4550	5474	5314	5478	6618	2534	5020	4532	5144	5084	4858	4556	4992	5622	6416	4958	4730	4328	3914	3434	3074	2730	2686	1714
1341	318.06113	7.98	317.054	0	0	13086	7400	5174	3872	3418	3164	3298	4858	5530	5054	4570	4556	5868	8224	8820	8876	0	7916	7408	0	7338	6920	7058	6028	5528	2692	3342	0	2824	2880	2250	1798	2758	2006	2688	2894	3512	3588	3138	3534	3418	3150	3240	1594
1342	195.93357	7.97	194.926	0	0	0	72	0	0	0	0	0	0	0	0	0	0	0	0	0	128	152	0	296	3682	3904	4556	4810	4622	6178	440	88	0	0	188	202	130	0	126	138	224	300	456	0	272	514	504	360	0
1343	345.96678	7.97	344.959	0	0	0	0	154	0	0	0	0	0	210	0	0	0	0	0	0	0	0	0	334	1812	2044	2184	2418	2670	2880	0	0	0	0	0	0	0	0	0	0	0	218	0	118	0	0	0	0	0
1344	112.01408	7.97	111.007	2680	2252	2204	2064	1726	1920	1872	1950	1774	1502	1690	1948	1516	1870	1750	2240	2180	2262	1820	1292	1138	0	0	0	0	1298	0	1190	1168	1462	1918	1712	1688	1634	1720	2038	1364	1316	1422	1752	2004	1632	1786	1692	1948	264
1345	172.10799	7.99	171.101	0	894	0	0	774	0	586	688	0	0	0	0	0	1334	0	0	0	1044	0	0	0	0	1438	0	0	0	0	942	0	0	1086	0	0	0	0	0	1916	0	0	3014	3204	3344	3340	0	1866	920
1346	93.93324	8.05	92.926	15176	0	18468	19032	0	0	0	0	0	0	0	14912	15536	16154	15324	9220	9150	8486	1212	0	0	606	186	198	416	246	0	4174	5676	5300	6168	6018	6382	6292	7982	7328	3676	3434	2846	2536	2290	2514	2908	2946	2752	0
1347	204.97998	8.06	203.973	0	0	0	200	504	0	0	1622	2992	3128	2564	2874	2568	2052	1610	1642	2196	2560	3240	3082	3616	8970	9266	0	0	10250	8176	2632	1412	966	0	0	1066	0	918	0	1308	1508	1754	2208	2470	1970	2590	1924	2052	0
1348	247.99762	8.09	246.99	0	1996	1956	1848	1914	2300	2688	2338	2100	1712	3200	2716	1568	1770	2100	2726	2632	2202	2108	0	0	0	0	0	0	0	0	6208	6270	5488	6816	6498	7044	7520	7760	0	3840	3364	2810	3272	3138	3322	2614	2326	2270	1104
1349	217.98738	8.14	216.98	0	0	11824	0	0	0	0	10706	0	0	7240	6754	3968	4048	3448	0	5656	4672	4022	0	4784	5248	5458	5786	0	0	0	0	3892	4632	4948	4698	5172	4270	4764	5030	6452	4952	4086	4838	3940	3512	3270	3268	2546	2012
1350	95.92978	8.14	94.9225	0	11282	0	13968	0	13070	13658	0	12272	11072	10126	9530	10490	0	0	6766	6686	5808	0	0	0	148	0	226	364	206	94	3492	3654	4032	4396	4728	4202	4816	4930	4752	3062	2698	2284	2266	1874	2396	0	2024	2276	19548
1351	218.05445	8.15	217.047	0	0	0	0	0	0	0	0	0	13256	13940	14364	13966	15246	14664	0	0	0	0	0	0	0	0	0	0	0	0	0	0	0	0	0	0	0	0	0	2210	1988	2692	2044	1912	1862	2284	2082	2380	398
1352	99.96198	8.19	98.9547	546	266	190	214	170	216	0	174	320	0	446	0	0	480	354	392	272	684	1004	0	1266	5386	6258	6702	8112	7458	7944	1936	994	704	572	608	400	0	532	574	0	0	1176	1422	1606	1808	1596	1590	1438	302
1353	97.96498	8.16	96.9577	6062	2994	3290	2434	2264	2608	2804	2774	2898	3648	3590	4950	4798	5274	3970	4726	4652	5922	9232	10704	0	0	0	0	0	0	0	0	11874	8498	6064	5596	6182	5362	4942	4750	7860	6752	0	17384	18518	0	0	0	0	2070
1354	177.92279	8.18	176.916	0	0	0	0	0	0	0	0	0	0	0	0	0	0	0	0	0	0	0	0	0	0	0	0	0	888	0	0	0	0	0	0	0	0	0	0	0	0	0	0	0	0	0	0	0	0
1355	345.96585	8.2	344.959	0	0	0	0	0	0	0	0	0	0	0	0	0	0	0	0	0	0	0	0	500	1902	2054	2654	2186	2450	3242	0	0	0	0	0	0	0	0	0	0	0	0	0	0	0	284	0	0	0
1356	344.13218	8.23	343.125	0	0	136	0	0	0	0	0	0	0	0	0	0	0	0	0	182	0	0	0	0	0	0	0	0	0	0	0	0	0	0	0	0	0	0	0	0	0	0	0	0	0	0	0	0	0
1357	182.07718	8.21	181.07	0	30526	25528	0	0	7490	6148	5606	5530	4854	5208	4652	7148	6388	7024	5866	5428	5830	0	740	490	0	452	464	420	0	338	0	11600	10550	0	11184	11102	11144	10598	11076	1570	1096	0	0	1216	0	1242	1408	1214	324
1358	344.21945	8.22	343.212	628	560	0	776	0	0	0	0	0	2474	2314	2308	3106	2834	2782	2624	2604	2996	0	0	0	0	0	0	0	0	0	2484	2024	2540	2782	2616	1898	2608	2364	2746	0	0	0	9338	0	0	10784	0	0	3446
1359	318.06183	8.25	317.055	0	17176	12490	7340	4850	3916	3130	3048	3126	4448	5300	5846	5152	4838	5128	7932	7534	8378	8618	7314	7746	0	7690	6908	6710	5810	5716	3594	2786	2788	2626	2250	2018	1868	1746	2118	2662	2482	3102	2782	2960	2970	3208	2962	3486	1436
1360	341.98904	8.22	169.987	1356	0	930	0	0	0	908	0	0	0	1520	1650	1152	1210	902	904	1230	1414	2468	2176	6230	2430	1456	886	298	0	0	196	0	0	0	778	0	0	0	0	0	1498	1812	960	626	512	308	288	266	0
1361	204.97951	8.24	203.972	0	258	0	246	570	836	1116	1678	2552	3026	2796	3358	2354	1920	1536	1658	2140	3020	2844	3510	3794	9064	10414	10690	9634	9624	8050	1980	1496	974	0	1088	1340	1070	1176	1110	1422	1286	2100	2006	2208	2256	2088	2068	2512	170
1362	172.10832	8.25	171.101	0	0	0	0	0	590	426	0	0	0	0	0	0	0	0	348	0	0	0	0	892	0	0	1056	1092	0	0	0	310	0	0	0	326	0	0	0	0	0	0	0	1232	1976	1264	0	0	0
1363	192.02555	8.26	191.018	0	11158	10466	7730	5950	5372	5352	4804	4934	7426	8530	8788	5978	5778	6076	8234	8290	8814	5564	4776	4456	4130	3558	3156	2566	2578	1760	1268	0	1268	1170	1184	1088	1184	1158	1514	1404	1682	1638	1328	1502	1212	1116	1144	0	346
1364	95.92946	8.3	94.9222	0	0	0	0	12998	0	0	13376	0	8376	0	0	0	0	10260	0	6502	6058	0	1000	728	0	464	0	104	178	90	2936	3616	4398	4914	4746	3734	4762	4560	4848	2900	2724	2458	2036	1894	2358	2018	2652	2158	0
1365	127.91023	8.32	126.903	1872	2214	1804	1622	1306	0	1012	0	0	0	0	0	0	0	0	0	0	0	0	1200	0	0	0	0	1086	0	964	0	0	0	0	0	0	0	0	0	0	0	0	990	0	0	948	948	0	0
1366	344.21897	8.4	343.212	0	548	0	0	526	580	596	666	838	2062	1764	2140	2970	2620	3116	2726	2578	2766	55064	54424	51528	37272	37550	37750	33904	32168	33280	2858	2728	2308	2272	2450	3336	2536	2584	2284	8326	8588	8780	9334	9382	9134	0	10188	11018	3586
1367	177.92238	8.37	176.915	0	0	0	0	0	0	0	0	0	0	0	0	0	0	0	0	0	0	0	82	0	402	0	0	0	0	0	0	0	0	0	0	0	0	0	0	0	0	0	0	0	0	0	0	0	0
1368	247.99822	8.36	246.991	0	2152	1724	1678	0	2322	1836	2460	2166	1962	2872	3092	1742	0	1698	2460	2558	1916	2578	0	0	0	0	0	0	0	0	6838	5850	0	7240	6998	9318	8950	8990	9850	4582	3382	3030	3368	2550	2558	2550	2250	2218	1160
1369	112.01406	8.42	111.007	2740	2728	2458	1866	1878	1746	2058	1870	1900	2034	2628	1820	1546	1676	1558	1866	2282	1992	1680	1280	1310	1082	0	774	0	0	0	0	1302	0	1500	1494	1466	1600	0	1288	1036	1230	1316	1446	1408	1694	1428	1740	0	154
1370	174.01526	8.45	173.008	3540	3282	2942	2582	2568	2906	3024	2352	3250	1754	1516	1566	0	0	1238	0	1828	2254	0	0	0	0	624	0	514	556	544	1166	0	0	1468	0	0	1174	0	1084	0	524	746	0	494	0	0	0	0	0
1371	130.02506	8.49	129.018	2044	1762	1920	1890	1674	1714	1554	1944	1754	998	968	0	1038	0	920	1168	1300	1558	0	0	430	0	480	508	464	612	544	922	910	922	1010	1078	960	930	1030	1090	520	544	476	466	0	0	336	502	624	208
1372	380.10648	8.5	379.099	0	0	0	0	0	0	0	0	0	0	0	0	0	0	0	0	0	0	0	0	0	0	0	0	0	0	0	0	0	0	0	0	0	0	0	0	0	0	0	0	0	0	0	0	0	0
1373	409.95711	8.52	203.971	0	118	0	0	0	0	0	1838	3428	3666	3950	3576	2650	0	0	0	0	2328	2822	3064	3282	0	9904	0	9442	0	7756	0	1406	0	0	0	0	0	0	0	0	0	1752	0	1888	0	2226	2202	2188	264
1374	182.07718	8.55	181.07	0	0	0	24392	0	10432	11354	6674	6552	4542	4706	5032	5982	6056	6138	6250	5712	5632	0	430	536	426	444	0	418	0	410	0	13018	11156	0	11612	11232	0	10382	11104	0	1154	0	0	1230	1366	0	1410	1314	296
1375	217.98746	8.53	216.98	778	0	0	10998	9434	9392	0	10092	0	0	7234	6676	4146	3992	4310	4792	5116	4342	4986	8048	5382	6166	6228	9178	9972	0	9484	3130	0	4738	5142	4596	5684	5078	6178	5932	5970	4448	4518	4234	3488	3324	2760	2972	2906	1900
1376	97.96487	8.56	96.9576	6216	3712	3064	2434	2878	2630	2388	2478	2758	3418	3870	5640	5516	4554	5022	4146	4414	5908	10140	10178	0	0	0	0	0	0	0	0	10970	8920	6146	5776	5486	4584	4862	4868	6318	6544	14424	0	18086	0	0	0	0	1878
1377	318.06130	8.53	317.054	0	0	0	8230	4996	4122	3512	3058	2918	5082	5714	5722	5522	6072	6226	7408	7900	0	7616	7448	0	7846	7446	0	0	5908	5564	2888	3216	2612	2714	2224	1942	1852	0	1894	2368	2572	2920	3042	2878	2914	2904	2416	3206	1434
1378	93.93343	8.55	92.9262	0	15486	0	18312	0	0	18764	0	0	0	12192	0	0	13224	0	9798	10008	10260	1178	1090	0	392	278	212	0	242	194	5540	6080	6002	6556	5904	6370	6366	6646	7076	4756	4066	3994	2878	2728	3022	3026	3182	3170	0
1379	228.08300	8.52	227.076	5998	4392	3112	3846	3416	2278	1722	0	0	1046	1100	0	1328	1172	1460	1124	1188	0	0	0	0	0	0	0	0	0	0	2016	1642	1558	1532	1908	1434	1570	1452	1436	0	0	0	0	0	0	0	0	0	0
1380	344.13234	8.52	343.125	0	0	0	0	0	0	0	0	0	0	0	0	0	0	0	0	0	0	0	0	0	0	0	0	504	0	0	0	0	0	0	0	250	0	0	0	0	0	0	0	0	0	0	0	0	0
1381	86.03495	8.53	85.0277	0	0	930	986	0	1038	0	896	1146	0	548	0	0	0	502	0	0	0	278	262	326	354	248	254	132	250	256	638	0	0	318	368	522	0	0	278	170	260	394	520	522	368	364	352	228	0
1382	204.97997	8.56	203.973	0	306	0	328	736	0	0	1556	2380	3968	3634	3576	2480	2110	0	1926	1980	2338	3074	3052	3678	9546	10774	10344	9340	10072	8082	2200	1434	0	1044	0	1130	1198	0	0	1436	1278	1644	2206	2174	2164	2094	2086	2232	234
1383	247.99777	8.61	246.99	0	2056	2046	1800	2732	2094	1964	2494	2356	1944	2654	2604	1614	0	1752	2764	2560	1908	3090	0	0	0	0	0	0	0	0	6636	6102	0	8048	8222	0	8580	0	0	3926	2880	3142	3174	2674	2504	2462	2026	2192	1348
1384	218.05476	8.63	217.047	0	0	0	0	0	0	0	0	0	0	0	0	0	0	0	0	0	0	0	712	0	0	0	0	0	0	0	0	0	0	0	0	0	0	0	0	1800	1968	1844	1902	1950	1970	2354	2488	2248	250
1385	136.03474	8.66	135.027	2108	2568	2272	2362	2448	1934	1956	2174	2288	0	0	0	0	998	0	0	1352	0	0	1270	1160	1052	0	0	924	0	0	1760	3036	3204	3390	4030	3500	3652	3916	4022	0	0	0	0	0	0	548	406	0	0
1386	341.98877	8.64	169.987	1338	1216	0	0	910	0	0	0	0	1076	1798	1668	0	988	1052	916	1328	1448	2392	1794	6372	2248	1174	0	0	548	0	256	752	0	818	0	866	0	0	654	0	1552	1720	0	566	442	0	404	424	0
1387	127.90995	8.66	126.903	2438	1972	2296	0	1484	1220	0	1198	0	0	920	0	0	0	0	0	0	0	0	0	0	0	1194	0	0	0	0	0	0	0	0	0	0	0	0	0	0	0	1058	0	0	0	0	0	0	610
1388	192.02608	8.68	191.019	0	0	11412	7864	6118	5884	5166	4360	4112	8018	8764	8092	6592	6806	5888	7970	8118	8664	6296	5412	5070	4874	3322	3224	2658	2104	2100	1216	1120	1150	0	1430	0	1332	1152	0	0	1274	1282	1494	1288	1396	1234	1102	1122	326
1389	156.00675	8.72	154.999	3466	3006	3700	2666	2030	2086	2224	2148	2126	2084	2044	1382	1510	1392	1290	1548	1518	1558	9876	10812	12240	12846	13898	15022	14394	15176	0	6536	5990	6740	5482	4540	3872	3156	2652	2688	1724	1676	1630	1458	1568	1448	1280	0	0	374
1390	86.03454	8.72	85.0273	0	0	904	0	0	0	0	0	0	0	0	0	0	0	0	0	0	0	316	0	396	526	284	0	260	224	0	0	0	0	0	354	266	450	550	514	228	208	290	366	304	164	272	344	156	0
1391	182.07733	8.73	181.07	0	0	0	0	21296	0	0	0	0	4432	4696	4740	0	6606	0	6242	5728	6244	0	466	0	0	0	0	0	0	0	0	0	0	0	0	0	0	0	0	0	1238	0	0	0	0	0	0	0	0
1392	129.89709	8.72	128.89	1770	1850	2996	2980	3720	5264	5232	6132	7658	2226	1628	1522	1904	1682	2054	2932	3258	2986	1182	0	524	196	178	128	0	0	0	3520	5782	6348	8016	8864	8904	10498	11210	11506	2214	1954	0	0	1152	980	0	1260	1316	3626
1393	112.01407	8.77	111.007	3154	2902	2404	2136	1920	1942	1912	1736	1722	2154	2324	1876	1764	1924	1732	1802	1758	2164	1542	0	1262	1244	0	1030	0	0	782	0	0	0	0	1192	0	0	0	0	0	1170	1230	1366	1420	1344	1572	1474	1394	176
1394	318.06198	8.79	317.055	0	0	0	8314	4976	3632	3490	2840	2976	6082	5666	5668	5198	5940	0	7766	7332	8748	7562	7136	8156	7890	8368	7300	6246	5432	5608	3008	2736	2170	2620	2162	2152	1768	1686	1856	2302	2286	2614	2818	3754	2790	2596	2958	2850	1328
1395	130.02461	8.79	129.017	2540	2016	0	1934	1880	1888	2628	1644	1872	0	1036	0	0	0	0	1344	0	1592	0	0	0	0	0	0	0	0	0	0	0	0	0	0	0	0	0	0	386	0	0	460	524	0	0	0	524	130
1396	247.99937	8.82	246.992	0	2062	2480	2074	0	2236	2356	0	2252	0	2762	0	0	0	0	2340	0	1882	4414	0	0	0	0	0	0	0	0	0	6972	0	0	9188	0	0	0	0	4036	3224	2762	3162	3130	2692	0	2634	0	0
1397	97.96527	8.82	96.958	8484	4548	4006	2956	2724	2548	2638	2610	2556	3728	4348	5632	4620	4494	4362	4368	4170	5250	9718	10146	17408	0	0	0	0	0	0	0	10526	9148	6222	5510	5398	4744	3884	4038	0	6522	0	0	0	0	0	0	0	1746
1398	93.93307	8.82	92.9258	0	14336	0	0	19380	19546	0	18236	18954	0	0	0	0	12696	0	0	0	8530	1232	0	0	0	492	230	294	190	164	5622	6032	0	6496	6490	6504	7212	7034	7590	5554	4310	3878	2758	4040	3010	3332	3474	3456	0
1399	208.02130	8.85	207.014	0	0	0	0	0	0	0	0	0	0	0	0	0	0	0	0	154	246	0	0	0	200	0	0	0	0	0	0	0	0	0	0	0	0	0	0	0	0	0	0	0	0	0	0	0	0
1400	174.01507	8.88	173.008	3562	3488	2980	3398	2534	2780	2666	2778	2716	2060	0	1670	1482	1362	0	0	2048	2300	0	0	0	0	310	0	750	358	632	0	0	0	0	0	1056	0	0	1154	0	430	500	0	0	0	0	0	0	0
1401	218.05499	8.86	217.048	0	0	0	0	0	0	0	0	0	0	0	14464	0	16440	0	0	18968	0	0	0	0	510	0	0	0	0	0	0	0	0	0	0	0	0	0	0	1904	1870	1724	1672	2336	2010	2438	2148	2148	384
1402	204.97918	8.9	203.972	0	0	0	0	0	0	0	0	2630	4428	3638	3044	2310	2194	2294	1580	2266	2564	3178	3420	4676	0	9688	0	0	9306	8234	2212	1202	0	0	0	0	0	0	0	1204	1386	0	1822	0	1660	2296	0	2026	0
1403	129.89750	8.92	128.89	1150	1582	1786	2430	3470	4202	4888	4748	5342	0	1646	1406	1626	1584	1774	2808	2710	2720	0	0	0	0	92	0	0	116	0	4082	5084	5638	6990	0	10176	9132	9636	0	1776	1944	1646	1122	0	0	0	1206	1336	4784
1404	345.75212	8.94	344.745	0	0	0	0	0	0	0	0	0	0	0	0	0	232	0	0	0	194	0	0	0	0	0	0	0	0	0	0	0	368	0	260	434	0	304	0	248	0	0	0	0	0	74	0	88	0
1405	341.98876	8.94	169.987	1486	0	932	0	0	0	0	0	0	1404	1828	1734	1304	0	1060	1118	0	1370	2790	1950	6976	2192	1316	0	0	354	0	0	532	0	614	0	0	0	0	630	1096	1360	1660	0	0	0	450	342	168	0
1406	219.83741	9.02	218.83	0	0	0	0	0	0	0	0	0	0	0	0	0	0	0	0	0	0	0	0	0	0	0	0	0	0	0	0	0	0	0	0	0	0	0	0	0	0	0	0	0	0	0	0	0	0
1407	136.03476	9	135.027	1868	3030	2612	2264	2090	2498	2162	2372	2216	960	0	0	0	922	0	0	1098	984	994	1300	1174	952	0	0	0	0	1080	1578	2934	2554	3262	2838	3324	3602	2964	3190	0	0	0	804	586	734	340	0	608	326
1408	182.07741	8.99	181.07	41700	0	0	0	0	16740	0	0	0	4628	4976	5428	5240	5526	5264	6818	6384	7266	0	0	0	0	670	740	852	622	714	0	0	0	11020	0	10828	0	10576	0	0	1526	0	1386	0	0	1276	0	0	0
1409	228.08330	9	227.076	6738	3768	2842	3662	3238	2620	2064	2194	2118	0	0	0	1174	1276	0	1168	0	1412	0	0	0	0	0	0	0	0	0	2302	2478	1696	1746	0	1388	1686	1428	1574	0	0	0	0	0	0	0	0	0	0
1410	97.96542	9.05	96.9581	0	4720	3916	2788	2710	2614	2872	2670	2718	3986	3904	5906	0	4906	4632	4684	4144	5160	0	0	0	0	0	0	0	0	0	0	11334	8364	5652	0	5906	4958	4564	4520	6098	6078	0	0	0	0	0	0	0	1742
1411	247.99813	9.02	246.991	2066	2562	2124	2442	2626	2458	2378	2930	2420	2324	2986	3292	1658	1920	1768	2040	1942	1808	8432	0	0	0	0	0	0	0	0	8410	6846	5962	8276	8896	10102	9988	9670	11136	3218	3162	3056	3132	2692	2440	2122	2000	2118	1168
1412	130.02425	9.01	129.017	2194	1898	1770	1966	1802	1808	2084	1730	1766	0	0	1100	0	0	1220	1446	1410	1658	0	624	0	590	418	0	376	592	0	0	772	0	0	972	0	1058	984	0	320	0	550	354	440	0	454	408	230	234
1413	127.91011	9.01	126.903	3630	3110	2580	2276	0	1212	1234	1134	0	0	0	0	0	0	0	0	0	0	1108	0	0	964	0	0	1064	0	0	0	0	1034	0	0	0	850	0	0	0	0	0	0	792	0	0	858	0	570
1414	409.95686	9.02	203.971	0	188	1526	400	490	958	1208	0	2586	4040	4072	4380	2732	2526	1868	1686	1948	2414	3372	3560	4130	9364	10244	0	10492	10130	8378	2168	1330	0	0	0	1088	946	894	0	1162	1248	1576	1922	2274	1902	2038	2022	2302	358
1415	218.05527	9.04	217.048	0	0	0	0	0	0	0	0	0	0	0	0	0	0	0	0	0	19384	0	0	0	0	0	0	0	0	0	31318	0	0	0	0	0	0	0	0	1922	1704	1870	2820	1616	2014	2238	1674	2342	0
1416	174.01498	9.1	173.008	4734	4122	3338	3556	3256	2912	2888	2776	3024	2054	2076	1780	1946	1930	1798	1756	2404	2166	0	0	1040	0	706	0	470	482	418	1064	0	0	1016	1308	1012	1088	1152	1258	568	448	454	488	332	0	0	0	0	0
1417	232.00237	9.08	230.995	1812	14308	11796	6148	4070	4858	4848	2604	2652	3332	0	0	8884	11824	0	0	0	8924	6206	5558	4012	4220	3856	3776	3896	4342	3912	1554	2016	1678	2218	1936	1984	2088	1944	2276	2544	2154	2242	2044	1924	2096	1950	2142	1802	0
1418	398.01496	9.09	397.008	0	0	0	0	0	0	0	0	0	0	0	0	0	0	0	0	0	0	0	0	0	0	0	0	0	0	0	0	0	0	0	0	0	0	0	0	0	0	0	0	0	0	0	0	0	0
1419	156.00700	9.12	155	3746	3448	2638	2308	2702	1980	2222	2352	1874	1978	1826	1602	2204	1566	1408	1556	1632	1362	9710	11000	11700	0	0	14516	14890	15938	16764	6718	5438	4978	4798	4434	3368	3190	2426	2700	1790	1788	1800	1500	1398	1448	0	0	0	314
1420	263.82777	9.15	262.82	0	0	0	0	0	0	0	0	0	0	0	0	0	0	0	0	0	0	0	0	0	0	0	0	0	0	0	0	0	0	0	0	0	0	0	0	0	0	0	0	0	0	0	0	0	0
1421	86.03442	9.16	85.0272	1402	1050	1024	986	1084	0	0	1082	0	0	718	0	0	0	670	0	696	1192	322	452	450	0	288	412	322	160	202	264	332	430	276	406	394	294	426	0	250	240	168	162	244	284	530	378	288	132
1422	182.07772	9.22	181.07	0	0	0	0	0	0	0	11026	10358	4678	5384	4870	5690	5574	5376	7590	6348	6986	1144	1168	1130	782	692	558	0	526	472	0	0	0	12228	0	11678	12396	11452	0	1680	2126	1510	1636	1422	1420	1624	1594	1504	656
1423	97.96497	9.22	96.9577	9402	4878	3872	3132	3160	3206	3106	3842	2602	4540	4892	7168	6150	5828	4622	3954	4234	5440	0	10400	0	0	0	0	0	0	0	0	10672	7218	5658	5200	5392	4872	4550	3730	6332	6334	0	16564	0	0	0	0	0	1966
1424	228.08401	9.24	227.077	5146	3146	2548	2904	2982	2282	1902	1610	1980	0	0	0	1092	0	0	1362	1234	1304	0	0	0	0	0	0	0	0	0	3186	2280	1896	2028	1834	1744	1568	1738	1636	220	0	200	0	0	0	0	0	0	0
1425	345.75313	9.2	344.746	0	0	0	0	0	0	0	0	0	0	0	0	0	0	0	0	0	0	0	0	0	0	0	0	0	0	0	0	0	0	0	188	318	394	0	352	0	0	0	0	0	0	204	0	0	0
1426	204.97949	9.22	203.972	0	156	0	0	0	0	0	2192	3152	4610	4782	4328	2928	2412	2110	1694	2022	2520	3698	3642	4544	0	10304	11524	0	10768	8842	2114	1336	1098	0	0	0	0	0	0	0	0	1588	1748	1944	2504	2036	2120	2070	168
1427	112.01397	9.28	111.007	3790	3090	3160	2706	2130	2568	2020	2014	1982	2798	1800	2336	1898	1954	1740	1788	1828	1892	1658	1370	1422	1184	1124	0	876	760	622	754	0	0	0	0	0	0	0	858	966	996	1382	1244	1382	1284	0	1446	1132	116
1428	93.93272	9.28	92.9254	0	9726	12668	13056	0	0	16592	0	0	9234	10082	8048	9568	0	0	11584	0	9976	1296	1148	1050	524	0	200	264	120	220	5784	6620	7632	7526	6738	7154	0	7922	9202	5290	5274	4146	3560	3378	3812	3796	3724	3964	0
1429	136.03589	9.28	135.029	2330	3056	2612	2774	2516	2360	2710	2382	2498	0	0	0	0	0	0	0	0	0	0	0	1180	0	0	0	0	0	0	1444	2516	3032	3040	3248	3646	3448	3154	2898	0	0	0	0	0	0	0	0	0	326
1430	109.90654	9.28	108.899	12694	0	15186	14988	14602	0	0	11846	12752	7234	7232	6200	9284	11194	9924	6386	7342	5474	0	0	0	246	120	104	128	0	106	5812	8162	9144	8794	8822	8950	9804	0	0	4534	4162	3676	3176	3170	3260	3086	3494	3304	284
1431	130.02441	9.33	129.017	2606	2316	2912	2262	1810	2200	2044	1926	1918	1258	1416	1260	1226	0	0	0	1702	1424	0	0	0	0	570	0	0	394	0	0	0	0	0	1034	0	1186	972	0	314	0	470	246	450	494	608	390	384	0
1432	219.83744	9.33	218.83	0	0	0	0	0	0	0	0	0	0	0	0	0	0	0	0	0	0	0	0	0	0	0	0	94	0	0	0	0	0	0	0	0	0	0	0	0	0	0	0	0	0	0	0	0	0
1433	232.00262	9.33	230.995	2048	14224	0	6188	4000	4540	4358	3386	2798	4126	0	0	8368	10670	0	0	0	0	6328	5252	4676	4062	3916	5210	4196	4714	4450	1684	1822	2092	1850	2092	1986	2114	2032	2164	2436	2436	2056	2226	2000	2098	1952	0	1838	1104
1434	170.99469	9.38	169.987	1530	1208	0	0	0	0	0	0	788	1284	1804	1630	1310	0	1124	1006	1026	1368	2534	2204	6920	2188	944	0	836	526	592	188	0	0	450	686	612	774	0	0	0	1588	1566	0	482	0	590	410	196	0
1435	318.06217	9.36	317.055	0	0	0	8216	5318	4122	3984	3456	3874	5790	7018	7628	5598	5808	8072	7728	7790	7464	8270	0	8754	0	0	7140	6272	5984	5238	2810	3016	2440	2482	2434	1774	1830	1850	1942	2196	2598	2510	2630	2836	2480	2190	2664	2766	1326
1436	331.88588	9.39	330.879	0	0	0	0	0	0	0	0	0	0	0	0	0	0	0	0	0	0	0	0	0	0	0	244	0	270	0	0	0	0	0	364	196	0	0	0	0	0	92	0	104	0	0	0	0	0
1437	380.10955	9.42	379.102	0	0	0	0	0	0	0	0	0	0	0	0	0	0	0	0	0	0	0	0	0	0	0	0	0	0	0	0	0	0	0	0	0	0	0	0	0	0	0	0	0	0	0	0	0	0
1438	263.82806	9.4	262.821	0	0	0	0	0	0	0	0	0	0	0	0	0	0	0	0	0	0	0	0	0	0	0	0	0	0	0	0	0	0	0	0	0	0	0	0	0	0	0	0	0	0	0	0	0	0
1439	398.01508	9.43	397.008	0	0	0	0	0	0	0	0	0	0	0	0	0	0	0	0	0	0	0	0	0	0	0	0	0	0	0	0	0	0	0	0	0	0	0	0	0	0	0	0	0	0	0	0	0	0
1440	463.99148	9.4	230.988	0	0	0	0	0	0	0	0	0	4244	0	0	0	0	0	0	0	0	0	0	0	0	0	0	0	0	0	0	0	0	0	0	0	0	0	0	0	0	0	0	0	2036	0	0	0	0
1441	247.99796	9.43	246.991	0	3584	3322	3132	3454	3134	2692	3238	2944	2472	2696	2684	2126	2292	1802	1812	2044	1782	0	0	0	0	0	0	0	0	0	7974	7596	6802	8886	10060	10424	10146	10424	10500	3636	3296	3242	3180	3122	2530	2364	2474	1972	1358
1442	344.13189	9.46	343.125	0	0	0	0	0	0	0	0	0	0	0	0	198	0	0	0	0	0	0	0	0	0	0	0	0	0	244	0	0	0	0	0	0	0	0	0	0	0	0	0	0	0	0	0	0	0
1443	228.08382	9.49	227.077	4412	3286	3146	3032	2614	2210	1650	1482	1756	1066	0	0	1096	0	1306	1256	1138	1350	186	0	0	0	0	0	0	0	0	4056	2934	2448	2196	2092	1774	1864	1724	1784	0	0	250	0	0	0	0	0	0	0
1444	345.75202	9.45	344.745	0	0	0	0	0	0	0	0	0	0	0	0	0	0	0	0	0	268	0	0	0	0	0	0	0	0	0	0	308	0	404	262	318	0	398	430	154	250	126	0	0	0	0	0	0	0
1445	86.03564	9.45	85.0284	1046	1640	1486	1628	0	1316	1328	0	0	0	0	0	0	646	0	0	0	0	250	386	294	264	0	252	168	272	270	330	214	322	346	386	462	268	0	0	274	0	230	248	374	98	208	284	366	166
1446	182.07717	9.49	181.07	0	0	0	0	0	0	0	0	0	4924	4910	5608	6666	6762	6988	8506	0	7914	0	0	0	0	0	506	540	504	558	0	0	0	0	14226	0	0	0	0	1452	0	1222	1404	1308	0	1502	1484	1624	0
1447	136.03535	9.5	135.028	2654	3070	3296	3104	3204	2514	2760	2432	2714	0	1220	1014	926	1078	1036	0	842	0	0	0	1206	0	0	0	0	0	0	1498	2800	2680	3266	2946	3250	3018	2900	3162	670	574	656	0	0	552	0	728	616	322
1448	97.96515	9.46	96.9579	11674	5000	4256	3246	3636	3080	3312	3060	2758	3758	4346	6734	5592	6516	4988	4364	4252	4880	9514	10250	0	0	0	0	0	0	0	0	9752	6834	5482	5444	5422	4378	4318	4144	6194	6506	13672	0	0	0	20798	0	0	1594
1449	331.88509	9.58	330.878	0	0	0	182	246	0	0	0	0	0	0	0	0	0	0	0	0	0	0	0	0	0	0	0	0	226	248	0	0	0	0	0	0	230	0	0	0	0	0	0	0	0	102	0	0	0
1450	219.83674	9.57	218.829	0	0	0	0	0	0	0	0	0	0	0	0	0	0	0	0	0	0	0	0	0	0	0	0	84	0	0	0	0	0	0	0	0	0	0	0	0	0	0	0	0	0	0	0	0	0
1451	156.00676	9.54	154.999	4094	3620	4072	2974	2450	2848	2394	2188	2106	2006	1728	1828	1884	1580	1496	1532	1282	1372	9536	10766	12262	0	13784	14426	0	0	0	6720	5878	5210	4764	4138	3714	2502	2626	2362	2106	1694	2092	1476	1554	1628	1188	1156	1270	230
1452	204.97990	9.58	203.973	0	0	1646	0	0	994	0	1858	2444	4914	4928	4694	3124	2532	2188	1734	1818	2336	3136	3472	4392	10416	10466	0	0	10046	8926	2178	1524	0	0	0	0	0	0	0	1494	1640	1630	1834	1874	1950	2212	1798	2258	348
1453	380.10932	9.61	379.102	388	338	0	0	0	104	308	282	274	0	0	0	0	0	0	0	224	0	0	0	0	0	0	222	0	0	0	0	0	0	0	0	0	0	0	0	0	0	0	0	0	0	0	0	0	0
1454	263.82818	9.61	262.821	0	0	0	0	0	0	0	0	0	0	0	0	0	0	0	0	0	0	0	0	0	0	0	0	0	0	0	0	0	0	0	0	0	0	0	0	0	0	0	0	0	0	0	0	0	0
1455	109.90710	9.66	108.9	12814	13260	0	0	0	0	0	13208	12784	5976	6044	6130	9732	9512	9260	6940	5866	5910	0	0	0	148	162	74	74	0	0	6734	8624	9756	9072	9700	0	10826	10844	10970	4412	4216	4012	3412	3144	3126	3496	3624	3504	260
1456	170.99521	9.64	169.988	1824	0	0	0	0	0	836	0	0	1056	2278	1662	1286	1504	0	0	1044	1498	2466	1950	7382	2454	1096	0	582	348	0	258	486	0	672	0	0	0	732	0	804	1500	1350	0	538	580	0	200	0	0
1457	218.05470	9.64	217.047	0	0	0	0	0	0	0	0	0	0	0	0	0	0	0	0	0	0	0	0	0	0	0	0	0	0	0	0	0	0	0	0	0	0	0	0	0	1762	1774	0	1600	2234	2290	1934	2406	0
1458	97.96522	9.66	96.9579	11398	5238	5390	3522	3224	3006	3074	3080	3550	4172	4310	6234	5732	0	5042	4736	4428	4684	9900	10220	0	0	0	0	0	0	0	0	10014	7346	5502	5262	5144	4184	4000	4268	5918	6302	0	0	0	0	20050	0	0	1976
1459	463.99415	9.63	230.99	0	0	0	0	0	4366	4160	0	2828	0	0	0	0	0	0	0	0	0	0	0	0	4742	0	0	0	0	0	0	0	0	0	0	2074	0	0	0	0	0	0	0	0	2328	0	0	0	0
1460	93.93241	9.64	92.9251	0	0	10296	0	11520	0	0	0	0	7610	7398	6958	7922	7550	7174	11560	11404	9906	0	0	0	0	0	248	230	130	150	5950	7228	7654	8298	0	7536	8258	8306	8548	4592	4726	3614	3268	3050	2722	3572	3286	3934	22690
1461	192.02558	9.7	191.018	19606	18770	0	11706	7368	7596	6282	5788	6440	8652	9490	10978	8248	7806	7782	7240	7808	9048	6924	5666	4818	4370	3224	2890	2532	1926	1740	1340	0	0	0	0	1122	930	0	1426	1184	1340	1198	1382	1188	1062	0	1076	1012	274
1462	247.99889	9.68	246.992	2388	4248	3614	4042	3708	3580	3316	3796	3902	2960	2688	2668	1966	2328	2262	1804	1868	1880	0	0	0	0	0	0	0	0	0	0	0	7236	9260	0	0	10348	10426	10648	3542	3190	3094	2968	2872	2340	2488	2056	2292	0
1463	183.05519	9.68	182.048	0	0	0	0	0	0	0	0	0	1336	0	1990	2402	2742	3576	2150	2168	1928	0	0	0	0	0	0	0	0	0	0	0	0	0	0	0	0	0	0	352	342	344	320	314	338	478	502	466	0
1464	130.02464	9.73	111.007	5074	4076	3784	3216	2778	2374	2384	2088	1702	2596	2458	2592	2162	1978	1968	1896	1682	1858	1872	1338	1352	1174	0	892	736	862	0	816	1042	836	0	0	0	0	900	1114	0	996	1156	1196	1158	1460	0	1370	1150	0
1465	278.10201	9.71	277.095	0	0	0	0	0	0	402	0	0	0	0	0	0	0	0	342	0	266	0	0	0	0	0	0	0	0	0	0	0	0	260	0	0	0	0	0	0	0	0	0	0	0	0	0	0	0
1466	318.06142	9.7	317.054	0	0	0	7952	5394	4974	4456	3784	3900	5854	0	0	6328	6464	7584	7214	7840	7514	8452	8394	9666	8278	7978	7082	6264	5944	5898	2994	2914	2698	2592	0	1972	1694	1954	1704	2338	2394	2668	2728	2712	2840	2432	3188	2992	1390
1467	398.01611	9.72	397.009	0	0	0	0	0	0	0	0	0	0	0	0	0	0	0	0	0	0	0	0	0	0	0	0	0	0	350	0	0	0	0	0	0	0	0	0	0	0	0	0	0	0	0	0	0	0
1468	344.13250	9.73	343.125	0	0	0	0	0	0	0	0	0	0	0	0	160	0	0	0	0	0	0	0	0	0	0	0	0	0	0	0	0	0	0	0	0	0	0	0	0	0	0	0	0	0	0	0	0	0
1469	409.95777	9.75	203.972	0	0	1328	612	692	954	0	1798	3700	5550	5152	4586	3750	3014	2244	1908	1918	2288	3474	3332	4176	10370	10398	10972	9330	10810	9036	2052	1464	1050	0	0	1106	0	930	0	1228	1524	1522	1988	1870	2222	2100	1998	2016	222
1470	182.07723	9.74	181.07	0	0	0	0	0	0	0	0	0	8672	10282	0	0	0	7688	8358	8182	8412	994	614	954	606	516	702	534	406	532	0	0	15716	0	18860	16984	0	0	14012	1498	1364	1302	1258	1570	1232	1282	1294	1532	0
1471	262.01524	9.78	261.008	1684	0	0	2274	0	2266	0	1606	1808	1740	2788	3534	1794	1850	1286	1306	0	2240	2270	1176	1602	902	0	744	646	0	0	0	1094	1374	0	1212	0	0	0	0	476	340	398	486	0	512	426	534	392	0
1472	463.99426	9.8	230.99	0	0	0	0	0	0	4890	3526	0	0	0	0	0	0	0	0	0	0	0	5666	3826	0	0	5214	4918	5366	4840	0	0	0	2342	0	0	0	2248	0	0	0	0	0	2394	2356	0	0	0	0
1473	331.88459	9.79	330.877	220	0	0	214	136	188	0	176	194	0	0	0	0	124	106	0	0	0	106	200	100	0	110	0	0	234	306	0	0	190	304	0	220	0	0	0	0	152	0	0	50	0	0	0	0	0
1474	228.08352	9.82	227.076	4068	3320	3092	2592	2398	2402	1818	1924	1502	0	0	1340	0	1224	1674	1228	1448	0	0	0	0	0	0	0	0	0	0	5076	3574	3346	2444	1992	2186	2218	1898	2020	0	0	0	0	0	0	0	0	0	0
1475	269.97987	9.83	268.973	0	0	778	716	664	0	650	792	606	398	0	0	0	0	0	0	0	0	1074	2460	3668	2432	2572	3404	4652	3810	3408	1142	1062	0	1406	1664	1456	1278	1598	1498	574	446	536	286	456	400	238	320	180	0
1476	218.05420	9.81	217.047	98134	0	0	0	0	0	0	0	0	0	0	0	0	0	0	0	0	0	0	0	0	0	0	0	0	0	0	0	0	0	37304	0	0	0	0	0	2150	2358	1924	1976	1768	1844	2002	1972	2218	0
1477	174.01467	9.87	173.007	7040	6152	5594	5500	4918	5542	4480	4396	3350	2516	3052	2390	2610	2408	2182	2352	1968	1972	1026	0	1026	736	756	328	506	412	344	0	0	966	0	1118	0	1098	0	1104	406	516	412	278	158	240	316	368	176	134
1478	242.11458	9.88	241.107	314	254	146	0	0	170	0	142	0	268	242	0	190	0	194	218	0	146	480	332	0	340	268	474	0	422	334	312	0	0	282	128	304	222	152	338	784	572	416	602	432	476	754	0	638	256
1479	232.00263	9.91	230.995	3504	0	12178	6430	4850	4972	4506	4282	3458	4676	0	0	7176	0	10730	0	0	7292	7322	5946	4912	5412	5674	5022	5932	5438	5946	1692	2020	2410	2062	2524	2366	2120	2432	2634	2952	2186	2390	2268	2080	2228	2170	1852	1946	1156
1480	380.10986	9.96	379.103	0	0	0	0	0	0	0	0	0	0	0	0	0	0	0	0	0	0	0	0	0	0	0	366	0	0	0	0	0	0	0	0	0	0	0	0	0	0	0	0	0	0	0	0	0	0
1481	109.90669	10.01	108.899	0	13108	0	15204	14894	15444	0	0	13968	6582	6402	6160	9104	9632	10392	6764	6272	5620	788	0	324	90	86	0	116	0	0	6872	8076	9290	8552	9416	9520	10676	10928	10774	3950	3840	3820	3302	3024	3166	3346	3486	3210	304
1482	409.95968	9.99	203.973	0	396	1518	580	0	1190	1182	2688	3824	6106	5198	5066	3858	2636	2332	1832	1990	2304	3294	3598	4022	9836	11470	9654	0	9300	9056	2534	1448	1072	0	0	0	906	0	0	1266	1418	1512	1742	2004	2124	2294	1930	2592	476
1483	247.99790	9.97	246.991	3270	4518	4126	4494	0	3980	4256	4554	3730	2766	3036	2628	2306	2312	2540	2272	2010	2110	0	0	0	0	0	0	0	0	0	9758	8426	0	0	0	0	10854	11656	12468	4542	2986	3796	3180	3018	2654	2244	1980	2290	0
1484	217.98722	10.02	216.98	2906	0	0	0	0	0	16822	0	0	0	10692	9636	6618	6550	6144	4770	4602	3858	5532	10870	0	0	0	0	0	0	0	7774	5780	0	7424	9280	0	11672	11410	0	6096	5252	4964	4512	4412	4186	3452	3154	3172	2022
1485	218.05465	10.02	217.047	0	97464	0	0	0	0	0	0	0	0	0	0	0	0	0	21544	0	0	0	0	0	0	0	0	0	0	0	0	0	0	36572	0	38500	0	0	0	2074	1784	1784	0	1642	1812	2120	0	2096	0
1486	278.09703	10	277.09	0	0	0	0	0	0	0	0	0	0	0	0	0	242	514	0	682	302	0	0	0	0	0	0	0	0	0	0	322	366	0	0	0	142	258	0	0	1010	0	462	536	404	1328	0	0	0
1487	183.05526	10.01	182.048	0	0	0	0	0	0	0	0	0	2772	2378	2176	4840	3948	5216	2438	2420	1742	0	0	142	0	0	0	0	0	0	0	0	0	0	0	0	0	0	0	634	520	640	392	336	440	368	408	432	0
1488	340.18884	10.09	339.182	510	332	334	334	422	246	430	0	436	0	0	922	0	0	0	420	732	646	14034	16110	11858	8588	8726	8362	7164	7094	6324	634	660	358	596	618	0	518	670	434	2452	2444	2412	2714	2864	3032	2674	2906	3420	1128
1489	130.02433	10.09	129.017	4716	4210	4020	4876	3758	4476	3616	4180	3224	2218	1858	1840	2020	1748	1776	1522	1610	1552	0	0	0	0	0	0	366	370	298	988	0	0	894	0	0	908	1032	0	0	486	494	230	378	310	382	332	366	0
1490	182.07732	10.07	181.07	0	0	0	0	0	0	0	0	0	0	0	0	0	0	0	0	8384	8482	0	0	0	0	140	468	0	360	0	0	0	23456	0	0	0	0	0	0	1494	1364	0	0	0	1162	1428	1302	1510	0
1491	86.03504	10.1	85.0278	1556	1780	1714	1488	1906	1828	1772	1764	1556	0	0	0	888	0	0	0	0	0	0	0	334	286	326	170	218	200	170	0	370	0	412	0	0	382	0	0	0	280	0	212	382	192	0	294	210	0
1492	97.96578	10.09	96.9585	10862	6330	4374	3706	3598	3686	3322	3542	2922	4304	4950	7822	6018	6328	5284	3568	3754	3840	8532	9722	18138	0	0	0	0	0	0	0	9740	6532	4718	4522	4728	4120	4386	3596	5668	5778	0	14986	14824	0	17546	16942	0	1896
1493	242.11440	10.1	241.107	186	0	194	328	0	0	0	0	0	144	218	184	330	0	0	0	242	0	0	518	4062	2984	3516	2996	2848	3126	2646	0	190	200	0	0	0	298	452	0	0	0	424	552	0	596	0	0	1530	0
1494	232.00319	10.15	230.996	3272	13942	0	6538	5594	5144	5290	4646	4012	5098	0	0	7468	0	10106	0	8588	6798	7468	6212	5098	6188	0	5300	6628	6602	6264	2216	2138	2232	2678	2544	2672	2642	2588	3418	2674	2454	2556	2194	2568	0	1972	2226	2156	1144
1495	302.20855	10.22	301.201	1096	798	880	870	866	0	0	882	0	2284	2604	2144	1844	1674	1738	1680	1372	1444	5018	4878	4468	3238	3034	3716	2854	3034	3054	622	564	732	612	762	626	594	684	634	7088	7002	7492	6206	6680	7010	7638	7462	7758	5476
1496	174.01467	10.22	173.007	6916	7464	8140	6494	6640	6258	6056	6018	5268	3072	2954	3106	2962	2548	2524	2608	2360	2490	0	0	0	736	446	374	412	0	0	0	0	0	0	1072	1088	1002	0	0	0	568	302	400	438	146	296	240	248	0
1497	217.98718	10.21	216.98	3504	0	0	0	0	0	0	0	0	16566	0	10314	6810	7108	6912	5952	5254	4264	6424	0	0	0	0	0	0	0	0	6864	7268	9096	0	10760	0	0	0	0	6774	6288	5552	4886	4514	4640	4044	3622	3184	2506
1498	262.01472	10.25	261.007	1870	1812	0	2130	2008	2246	1988	1888	1914	2128	2888	4142	2430	2010	2060	2220	2182	4674	2854	1428	1490	826	1050	1342	994	1058	870	418	0	1306	1254	0	0	1008	0	0	948	336	500	426	510	466	0	462	592	248
1499	228.08436	10.2	227.077	4174	3280	3232	2950	2892	2580	2332	2126	2008	1632	2000	2104	0	2120	1956	1228	1448	1524	0	0	0	0	0	0	0	0	0	5526	4588	3362	3506	3242	2590	2700	2372	2056	0	0	0	0	0	0	0	0	0	0
1500	208.02027	10.25	207.013	278	0	0	0	0	0	0	0	0	296	0	0	0	0	0	0	0	0	340	320	0	0	0	0	0	0	0	0	0	0	0	0	0	0	0	0	0	0	0	0	0	0	0	0	0	0
1501	331.88397	10.29	330.877	172	0	0	0	0	332	0	0	180	172	0	242	0	0	0	0	0	0	104	0	106	136	0	0	146	216	0	0	0	0	308	52	0	130	66	212	0	0	0	0	118	0	46	0	0	0
1502	409.95833	10.27	203.972	0	270	1734	398	660	1162	1524	2608	5000	6218	5708	5830	4120	3060	2756	2020	2328	2744	3162	3950	4016	8748	10800	10008	9734	10308	0	2172	1736	922	920	936	1038	0	0	914	1124	1172	1612	1612	1508	1932	1880	1840	1956	386
1503	214.11931	10.29	213.112	852	1102	860	930	806	742	830	670	812	1660	1832	1568	2206	2106	2204	2340	1714	2324	4706	5130	4196	3522	3886	2590	2246	3000	3096	838	1420	1042	1146	1236	1000	1026	1124	1032	7444	6794	6814	6956	7190	7674	8580	8718	8296	1314
1504	269.98041	10.32	268.973	0	0	0	566	898	734	1068	0	0	406	0	0	0	0	0	0	0	0	1204	2010	2926	2938	2790	3040	3124	3244	3192	1550	0	0	1324	1472	1654	1280	0	1532	304	294	382	364	0	0	260	234	300	518
1505	136.03529	10.33	135.028	3344	3842	4124	3576	3846	3296	3164	2950	2498	1186	1268	1232	1102	1172	1240	0	0	0	1170	1322	0	0	1006	1116	934	0	0	1558	2962	2782	3330	3566	3056	3426	2884	2822	0	558	674	534	728	0	570	598	624	0
1506	247.99677	10.3	246.989	3926	5440	4970	4714	5412	5636	5446	4894	4956	2912	3112	3118	2964	2568	2800	2176	2210	2740	0	0	0	0	0	0	345890	351410	353004	0	8962	9108	0	11616	12402	11814	11774	0	3336	3222	3522	2814	2948	3328	2502	2372	2218	1220
1507	86.03475	10.34	85.0275	2408	2142	1724	2012	1722	1728	0	1720	2062	0	0	860	0	1086	0	0	0	0	0	440	442	254	0	204	156	0	240	0	392	0	0	0	290	0	384	0	446	258	0	220	302	294	316	164	320	96
1508	182.07762	10.3	181.07	0	0	0	0	0	0	0	0	0	0	0	0	0	18324	0	8194	8658	7822	662	634	432	350	384	350	390	358	302	36968	29652	0	22664	19772	0	20870	17728	0	0	1378	1286	1326	1250	1244	1404	1226	1532	360
1509	183.05503	10.33	182.048	0	0	0	0	0	0	0	0	0	2942	2922	3354	7998	7842	6730	2498	2034	1822	0	0	0	0	0	0	0	0	0	0	0	0	0	0	0	0	0	0	416	372	408	550	400	628	304	628	446	0
1510	109.90686	10.32	108.9	8894	11836	11180	13278	14660	0	14496	14364	12842	6190	6320	5974	0	9254	8160	5920	6196	4512	0	0	164	72	68	0	0	0	56	6530	8130	9862	9280	9202	10266	10046	10612	0	3790	3672	3478	2922	2892	2638	3010	3124	3176	0
1511	218.05434	10.38	217.047	0	0	98364	98544	0	0	0	0	0	0	0	49684	0	54264	53574	0	20122	20122	0	0	0	0	0	0	0	0	0	0	0	0	0	0	0	42400	43290	42438	1888	1832	0	1758	1490	1630	1664	2114	2364	284
1512	232.00307	10.38	230.996	3544	0	12282	7424	5724	4920	5142	5268	4766	4810	0	0	7418	9736	0	0	0	6706	0	6376	5656	5802	6540	0	0	6568	7010	2626	2730	2474	2784	2878	3004	2940	3096	3252	2788	2780	2218	2664	2334	2698	2436	1966	2112	1266
1513	344.13297	10.44	343.126	0	0	0	0	0	380	0	168	0	0	0	0	0	274	0	0	0	0	0	0	0	0	0	0	0	0	0	0	0	0	294	0	0	0	0	0	0	0	0	0	0	0	0	0	0	0
1514	188.10336	10.46	187.096	440	328	356	438	228	262	236	222	292	0	358	0	360	388	282	242	362	404	0	0	0	852	612	828	0	684	452	374	152	320	172	210	234	260	232	288	834	812	0	796	0	0	0	996	0	524
1515	280.16671	10.47	279.159	0	438	0	0	316	0	228	0	0	0	272	452	482	466	370	312	374	616	13664	14542	14396	11276	10768	11184	9892	10108	11148	352	392	0	228	0	0	220	0	0	1308	0	1112	1094	1768	1760	1952	1954	1400	1210
1516	324.19391	10.47	323.187	738	0	0	0	592	720	790	0	0	1764	1564	1752	2324	2164	2320	1896	2066	1790	0	11250	0	0	8042	8770	7858	6724	7726	1728	1514	0	1682	1688	1660	1396	1476	1542	6344	6684	6086	6838	7196	7240	8038	8162	8754	1514
1517	238.01079	10.49	237.004	3344	1046	0	0	0	0	0	20534	15528	0	2848	8604	7984	0	8378	0	10526	7326	4124	1638	0	1422	1122	0	1540	1456	1288	388	0	0	0	1182	1642	1330	0	0	1186	0	1190	1690	0	1592	1436	1790	1970	600
1518	247.99745	10.49	246.99	4738	5128	5224	5770	6156	0	5382	7056	5520	3242	3388	3546	3042	2984	3146	2434	2524	3552	0	74890	0	0	0	352650	0	0	0	0	0	9356	0	0	0	0	0	0	4008	3138	2926	2804	2868	2838	2386	2072	2394	0
1519	368.21950	10.47	367.212	1938	1792	1894	1664	1584	1784	1434	0	1422	5128	5552	4990	5002	4884	5322	4538	4480	4410	2824	2486	2002	1868	1710	1754	1796	1678	1636	3042	2850	3046	3374	3678	3824	3436	3260	3116	13916	13444	13398	15018	15774	15340	16270	15862	0	1842
1520	182.07654	10.51	181.069	0	0	0	0	0	24468	0	0	0	0	0	0	0	0	0	8320	8974	8142	0	562	582	346	604	0	450	332	292	0	0	0	0	0	19708	0	0	0	1394	1234	0	1222	1466	1244	1264	0	1262	478
1521	214.12044	10.47	213.113	0	468	0	1062	0	0	432	0	466	1424	1796	0	0	2196	2288	0	1950	1990	3256	0	2938	0	2558	2290	0	2208	0	0	1014	0	0	0	0	0	430	0	6272	5872	0	2906	6736	8448	8064	8568	8144	0
1522	217.98721	10.48	216.98	4260	0	0	0	0	0	0	0	0	0	0	0	8524	8080	7112	6242	5408	5174	6986	0	0	0	0	0	0	0	0	8324	0	0	0	12454	0	0	0	0	7686	6248	6504	5248	5132	4714	4072	4428	3862	2470
1523	136.03440	10.51	135.027	3296	3988	3678	4202	3764	3182	3308	3084	2854	0	0	0	0	0	0	0	0	0	0	1274	0	0	0	0	0	0	0	1954	3024	2856	3498	3480	3452	2844	2996	3234	0	0	0	0	0	0	0	0	0	0
1524	342.20333	10.54	341.196	0	452	498	0	0	494	488	432	614	0	1170	1182	1366	1434	1336	0	0	1196	0	0	0	0	8426	8744	7220	5978	7370	0	1204	1174	964	1058	0	902	1068	1220	4134	4620	4106	4132	4232	4252	4802	4724	5130	0
1525	112.01348	10.54	111.006	6788	5420	5742	4268	3238	3122	3262	2882	2702	2884	2986	2668	2384	2538	2686	2226	2164	2182	1758	1706	1334	1226	0	946	908	0	708	564	1012	718	0	1032	0	0	0	792	938	1248	1536	1410	1306	0	1104	0	1480	278
1526	86.03493	10.56	85.0277	2102	2288	2220	2214	2134	1946	1930	1964	1634	1110	0	1222	992	0	1330	0	1146	0	608	356	312	310	372	352	298	296	276	424	0	0	0	484	408	0	542	480	342	330	300	198	286	440	132	308	0	78
1527	340.18959	10.55	339.182	398	460	528	0	524	466	0	500	602	1094	0	0	1250	0	1064	0	0	0	14226	13130	11232	8874	9270	8592	0	7624	7200	1166	0	0	692	724	0	698	0	0	3046	3690	3406	3452	3714	3810	3762	4234	4066	0
1528	284.16194	10.54	283.155	590	506	566	428	322	454	540	494	582	1142	1080	1318	936	820	798	712	922	784	3268	3174	2984	2724	2722	2804	2188	2302	2048	326	558	556	0	414	710	508	404	0	4764	4618	5100	4538	5242	5174	5224	4634	4578	2058
1529	79.92393	10.56	78.9167	1178	924	0	0	944	0	0	0	1108	0	0	0	620	0	0	442	410	344	0	0	0	90	0	0	0	0	0	0	360	588	0	0	0	0	0	0	0	0	0	0	376	0	428	0	0	0
1530	477.17798	10.6	476.171	216	234	294	0	0	0	274	0	0	0	0	0	0	0	150	0	0	0	0	0	0	0	0	0	0	0	0	0	0	0	0	0	0	0	0	0	0	0	0	410	0	0	0	0	0	0
1531	183.05565	10.6	182.048	0	0	0	0	0	0	0	0	0	3504	2970	4602	8354	0	7920	2444	2210	2082	0	0	0	0	0	0	0	0	0	0	0	0	0	0	0	0	0	0	378	582	532	378	376	0	460	334	538	0
1532	130.02447	10.61	129.017	7300	7108	5484	6636	4932	4730	5170	5126	4834	2094	1968	2436	2008	2340	2488	2388	1902	1944	1244	0	0	0	640	374	592	568	300	0	968	1072	0	0	0	1044	0	0	586	418	190	394	460	276	322	454	250	236
1533	228.08290	10.6	227.076	4272	2976	3072	3236	3070	2488	2136	2660	2004	2008	2216	2016	1766	2150	2204	1466	1340	1470	0	0	0	0	0	0	0	0	0	4724	4532	3024	3370	3088	2556	2830	2318	2192	0	0	0	0	0	0	0	0	0	0
1534	301.93640	10.64	149.961	0	0	0	3194	2218	1524	1002	914	0	0	0	0	952	0	0	0	0	0	0	0	0	2164	2214	2090	2200	2132	2150	886	0	0	0	0	0	0	0	0	268	266	488	386	0	0	530	514	0	0
1535	263.82817	10.64	262.821	0	0	0	0	0	0	0	0	0	0	0	0	0	0	0	0	0	0	0	0	0	0	0	0	0	0	0	0	0	0	0	0	0	0	0	0	0	0	0	0	0	0	0	0	0	0
1536	218.05430	10.67	217.047	0	0	0	0	93756	93972	0	0	0	50066	49914	0	51368	0	0	0	0	0	0	0	0	0	0	0	0	0	0	0	0	0	0	0	0	0	0	0	1816	1588	1338	1564	1300	1462	1912	0	0	0
1537	247.99809	10.71	246.991	5024	6222	6432	6688	5760	6772	0	7122	0	3578	3134	3842	3334	2958	2800	2650	2744	2808	34258	0	0	301258	319334	0	0	0	0	0	0	0	0	13682	0	0	0	0	3964	3488	2960	2682	3038	2914	2250	2316	2082	0
1538	368.22064	10.7	367.213	1706	2508	1792	1458	1410	1452	0	0	0	4822	0	0	4976	5284	5142	5558	5044	4322	2704	2694	1878	0	1650	0	0	0	1662	3292	2660	2824	3716	3274	3124	3084	3134	3340	0	0	12740	0	0	0	0	0	15808	1324
1539	362.18515	10.68	361.178	0	0	0	0	0	0	0	306	0	0	0	3512	4456	0	4340	3876	3282	3596	0	0	6436	4006	3802	3756	0	2948	2372	0	0	0	0	0	0	2206	2266	2400	0	0	0	0	0	9564	0	0	0	0
1540	344.21897	10.69	343.212	608	956	782	0	896	894	0	0	674	1500	1744	1454	2072	1720	2080	1714	1540	1590	19520	17410	14222	11420	11910	10746	10390	9762	9556	1454	1296	1264	1482	1490	1520	1234	1486	1288	4764	4912	4994	5442	5322	4966	6208	5890	6012	1534
1541	136.03556	10.75	135.028	3378	4182	4030	3624	4014	3504	3256	3174	3326	1132	1460	0	0	1086	0	988	970	1098	1016	1096	1164	982	0	0	0	0	0	1662	3040	2966	3264	3682	3620	2962	2826	3066	640	0	0	550	626	690	490	404	424	0
1542	221.83474	10.74	220.827	0	0	0	0	0	0	0	0	0	0	0	0	0	0	0	0	0	0	0	0	0	0	0	0	0	0	0	0	0	0	0	0	0	0	0	0	0	0	0	0	0	0	0	0	0	0
1543	232.00258	10.74	230.995	4388	12902	12670	7076	6694	0	5948	5738	5098	5096	9862	0	7620	9910	9980	0	0	7324	7040	0	6506	6714	6992	6886	0	7308	7908	2344	3240	2672	3710	3442	3174	3450	3940	3360	2854	2724	2808	2580	3002	2288	1936	1888	1848	0
1544	422.16245	10.75	421.155	0	0	0	0	0	0	0	0	0	0	0	0	0	0	0	0	0	0	0	0	0	3056	2888	3052	3056	2950	3054	0	0	0	0	0	0	0	0	0	0	0	0	0	0	0	0	0	0	0
1545	112.01343	10.77	111.006	6786	6416	5706	4294	3770	3604	3502	2824	3078	3032	3192	2832	2382	2444	2396	2408	2204	2600	1704	1792	1890	1338	1200	738	0	670	576	0	0	0	0	0	0	0	852	714	0	1362	1410	1438	1436	1380	1366	1168	1422	270
1546	477.17638	10.77	476.169	394	352	0	0	0	0	0	0	0	0	370	0	0	0	0	0	0	0	0	0	0	0	0	0	0	0	0	0	0	0	0	0	0	0	0	0	0	0	0	460	0	0	0	0	0	0
1547	326.20857	10.79	325.201	2066	2154	2008	2158	2264	2682	1900	2358	1962	10334	10734	10190	12792	12406	11920	9090	9664	9768	40178	40268	37686	30318	30082	30910	27178	24976	26962	4882	4982	5518	5386	4616	4470	4574	4248	4846	23726	22214	22864	24562	24234	26026	26302	25956	29714	1990
1548	126.10203	10.78	125.095	0	0	0	380	336	370	398	268	232	166	234	282	0	270	0	124	128	0	122	244	218	0	0	0	122	110	220	0	0	0	58	0	0	0	0	230	152	184	0	128	150	0	296	194	110	0
1549	342.20383	10.86	323.186	0	828	0	0	672	0	0	0	0	1814	2038	2008	2514	2564	2638	2314	2188	2520	21436	18558	17712	15166	15942	15180	14920	13520	14182	1650	1542	1670	1814	1774	1806	1772	1624	1622	7048	7644	7280	8014	8038	7734	8918	7988	8846	0
1550	301.93582	10.83	149.961	0	0	0	2636	2496	1360	0	894	746	882	0	0	1080	1026	1252	0	0	800	0	1188	1288	2782	2064	1906	2458	1846	2208	0	694	350	0	150	0	0	0	0	568	350	312	256	0	0	502	0	0	0
1551	174.01451	10.82	173.007	0	9184	8542	8480	0	8588	7474	7598	6666	3830	4126	3222	2984	3124	3236	3064	2924	2670	1368	0	1108	0	328	626	0	576	0	620	1110	1212	0	1122	0	0	1124	0	620	450	354	348	196	228	218	184	296	94
1552	263.82804	10.82	262.821	0	0	0	0	0	0	0	0	0	0	0	0	0	0	0	0	0	0	0	0	0	0	0	0	0	0	0	0	0	0	0	0	0	0	0	0	0	0	0	0	0	0	0	0	0	0
1553	182.07724	10.85	181.07	0	0	0	0	0	0	0	0	0	19160	18360	19214	17886	0	0	7788	8472	8022	0	584	524	382	0	0	420	0	426	0	0	0	0	18086	16624	0	0	17148	1532	0	1232	1256	1176	0	0	1332	1376	596
1554	324.19292	10.82	323.186	0	0	0	0	0	0	0	0	0	1874	0	1938	2366	2606	2428	0	2188	2482	0	0	0	0	0	0	0	0	0	1724	0	0	2214	1828	1580	1690	0	0	6948	0	7238	0	0	7386	7898	8828	8832	0
1555	79.92414	10.84	78.9169	1156	0	0	0	0	0	0	0	0	0	0	0	0	0	0	0	320	364	0	0	0	0	0	0	466	544	0	0	444	0	0	0	0	0	0	0	0	518	0	0	0	0	0	0	472	0
1556	362.18400	10.88	361.177	0	0	0	0	1462	1272	2552	1258	0	4300	3630	3726	4358	4604	5166	3696	3548	3774	0	12652	8794	4726	3816	6246	3430	3020	0	2734	2096	2462	2666	2370	3148	2240	2358	3406	10614	10248	0	9934	0	10170	0	0	0	0
1557	97.96475	10.93	96.9575	0	4436	4702	3230	3684	2866	3016	3478	3338	4092	3976	0	5130	5446	4404	4548	3312	4166	6760	8138	0	0	0	0	0	0	0	0	8584	5792	4118	3820	3714	3350	3366	2988	4810	5360	10242	0	0	0	0	0	0	1712
1558	238.01003	10.89	237.003	3652	1614	0	0	0	0	0	19788	0	21732	3568	0	7138	0	7206	8152	0	7684	3532	1926	1688	1626	1392	1790	1442	1388	1674	620	1248	1318	1358	1826	1886	1646	1928	2140	1216	1604	1454	1718	1860	1618	1830	1964	2124	854
1559	221.83520	10.91	220.828	0	0	0	0	0	0	0	0	0	0	0	0	0	0	0	0	0	0	0	0	0	0	0	0	0	0	0	0	0	0	0	0	0	0	0	0	0	0	0	0	0	0	0	0	0	0
1560	170.09171	10.89	169.084	0	1732	0	1304	0	0	1086	0	0	664	0	478	366	426	536	378	524	502	0	0	1552	1258	1232	1294	1046	510	1252	342	306	314	350	260	312	0	362	156	0	0	318	480	366	424	574	0	444	332
1561	192.02554	10.89	191.018	0	0	20530	15430	12578	10388	9240	7200	7050	10386	12484	0	9792	10326	9662	9576	9602	8526	7634	6160	5444	4166	3852	2884	2460	2122	1702	1224	0	1200	0	0	1144	1166	1088	1090	1214	1278	1266	1304	1226	1114	0	0	0	346
1562	242.11439	10.91	241.107	808	728	676	432	694	360	404	550	430	2304	2718	2690	1800	1982	1984	1748	378	1514	722	590	0	0	294	440	468	446	0	0	370	184	0	284	590	238	316	310	0	0	0	0	392	0	806	632	830	314
1563	340.18783	10.98	339.181	652	584	608	520	662	512	598	442	416	1064	1426	1108	1274	1358	1340	0	1484	0	8536	4824	0	5718	0	3824	0	3354	3758	0	0	986	766	940	0	766	752	764	3724	3810	3668	4070	3860	4342	4506	4330	4566	0
1564	126.10204	10.96	125.095	0	0	0	844	414	0	420	520	392	258	284	158	200	332	148	96	102	140	204	116	294	402	440	374	718	330	740	136	128	0	172	118	118	0	104	186	136	262	0	220	174	266	0	224	200	132
1565	232.00274	10.98	230.995	4710	11502	12138	7296	6594	7782	6346	5994	6698	5570	9382	0	8914	10012	10142	11112	0	9110	7050	6950	6278	7040	6552	7870	7366	7958	0	3798	3366	3388	3766	3900	3744	4384	3736	4366	2486	2470	2430	2426	3106	2498	2152	2556	2068	1318
1566	218.05376	10.99	217.046	0	0	0	0	0	0	86998	85148	0	0	0	0	0	0	0	0	0	0	0	0	0	0	0	0	0	0	0	0	0	0	0	0	0	0	0	0	1586	0	0	0	0	1542	1512	1438	1450	0
1567	130.02446	10.97	129.017	0	7752	6752	7764	6606	5852	5798	5458	5496	2850	2576	2684	2394	2442	2846	2372	2612	2326	0	968	904	0	0	0	0	332	602	0	0	1132	982	0	1042	1024	0	634	200	402	564	358	354	314	310	278	346	242
1568	156.00748	11	155	5556	4290	3876	3240	3186	2848	3012	2804	2528	2192	2182	2214	2164	1882	1726	1578	1990	1408	8824	11332	0	0	0	0	16010	0	0	8686	6416	5780	5640	4674	3558	3260	2636	2420	2018	2198	1864	1722	1804	1612	1448	1422	1332	260
1569	414.15733	11	413.15	0	0	496	504	692	576	400	540	0	0	802	708	0	970	1264	0	0	768	19090	19306	15458	10072	10218	9690	9906	9550	9630	1312	0	0	0	1272	0	1282	1614	996	2182	2038	2134	1910	1578	0	2562	0	2146	0
1570	196.10827	11.01	195.101	540	0	0	0	0	0	0	0	0	0	172	0	0	226	0	246	0	1866	428	628	476	478	538	420	0	370	420	0	0	0	0	0	0	0	0	0	0	0	382	356	3464	2956	2738	3292	0	0
1571	280.16672	11.01	279.159	556	242	0	376	414	288	264	306	460	516	538	458	544	774	432	0	578	0	5846	4352	4116	3166	3940	3130	3228	3198	3416	666	740	556	392	314	396	0	528	222	1506	1734	1460	2080	1790	1616	1856	1860	2010	0
1572	370.13085	11.02	369.124	0	0	0	0	0	0	0	0	0	0	590	0	0	314	0	0	0	0	0	728	0	0	0	0	0	0	0	0	0	0	0	0	0	0	0	0	506	0	680	0	0	0	0	788	0	1846
1573	364.19932	11.02	363.192	2878	2840	2662	2946	2870	2688	2912	2536	2666	8018	8858	7410	9780	10590	9908	8220	8386	7290	0	0	0	5114	0	0	0	0	0	4112	5228	4128	2884	6540	6654	6300	6720	7070	17976	16610	17630	17232	15986	15568	15600	0	16434	6566
1574	182.01079	11.04	216.98	0	0	0	0	0	0	0	0	0	19890	14824	11332	9086	9296	7644	7864	0	6210	8270	0	0	0	0	0	0	0	0	0	0	0	0	0	0	0	0	0	7140	6188	6182	5860	6192	5676	5278	4720	5056	2478
1575	334.15274	11.03	333.145	298	624	0	382	0	398	454	0	0	0	516	422	0	598	510	0	0	0	1002	942	0	0	664	626	0	0	0	0	346	0	0	0	0	346	0	0	984	1010	992	0	970	1042	1210	1384	0	1634
1576	386.18223	11.04	385.175	1524	2128	2170	1946	2556	2248	0	2254	1814	3562	3980	4158	5374	4558	5462	5232	4614	5514	1706	1484	1024	762	730	832	824	700	0	2992	2710	3536	3736	3150	3784	0	1948	3502	10546	10880	0	9950	10000	10138	10852	11014	10698	4750
1577	328.22432	11.06	327.217	6240	6934	7172	6318	7236	6030	5502	5956	5358	22852	23652	22822	27872	27834	27684	22792	21302	21806	52034	49760	40304	34236	34552	34984	34042	30764	32810	18086	16470	16172	19476	17990	18858	16580	17678	18056	47002	47788	47318	48536	47662	49714	50508	57872	0	24376
1578	247.99794	11.05	246.991	5858	6670	6892	7610	7338	7096	7374	7246	7006	3648	4148	3824	3312	3346	3118	2670	3066	3156	0	0	0	0	0	0	0	0	0	0	11820	10910	13836	14912	0	0	0	15086	3896	3088	2890	3102	3190	2606	2240	0	2284	1450
1579	370.23482	11.06	369.228	5490	5182	3142	4152	4304	4348	4246	4524	3996	12692	12498	13564	16390	15096	16008	17050	16540	16102	3304	2974	2906	2204	2636	2430	2168	2074	2004	8354	0	7138	10540	9158	10318	9464	9324	9884	15642	15698	16000	17572	16736	17700	17730	18258	19290	5616
1580	426.19240	11.07	425.185	0	0	0	0	0	0	0	0	0	0	0	0	0	0	0	0	0	0	1190	908	0	3688	3560	4140	4110	4374	4718	0	0	0	0	0	0	0	0	0	0	0	1640	1730	1464	1836	1662	0	1884	0
1581	262.01400	11.06	261.007	2234	1790	1968	2668	2780	2714	2686	2580	2670	2586	4014	5706	3776	4188	3526	2650	3666	6500	4026	1752	1910	982	0	1080	716	0	674	0	1264	1348	1456	1232	1216	1276	0	0	686	0	538	646	430	490	370	658	396	240
1582	477.17712	11.08	476.17	290	370	306	0	0	0	0	0	0	0	0	0	0	0	0	0	0	0	0	0	0	0	0	0	0	0	0	0	0	0	0	0	0	0	0	0	0	0	0	0	0	0	0	0	0	0
1583	208.10819	11.06	207.101	366	306	330	462	0	432	484	0	0	774	506	718	836	600	562	938	784	952	690	710	878	514	256	604	632	480	504	796	980	956	1094	1108	1082	898	906	936	726	780	878	650	776	874	988	650	1018	650
1584	350.20820	11.1	349.201	1746	1684	2000	2018	0	2020	1554	1804	1852	4350	4298	4706	5646	4956	5272	5898	5386	6214	2236	1986	1834	1508	1530	1694	1404	0	1512	3188	3336	2778	2934	3180	3970	3712	3934	3892	11682	11614	11886	13768	14384	13570	15694	13952	14410	0
1585	406.21009	11.12	405.203	4082	3684	4346	4800	4100	4716	3462	3802	4036	10386	10676	10264	13594	12394	13370	12872	11756	11632	0	0	0	0	0	0	0	846	0	4516	5800	5432	6982	7268	7434	7168	7368	6904	11436	9824	9882	9592	9666	9360	10428	9916	10442	4000
1586	344.17432	11.13	343.167	718	824	0	692	0	738	698	650	0	2648	3068	2352	3820	3368	3430	3226	2938	3174	7068	5976	4768	3506	3302	3236	2814	2146	1914	1658	1622	1856	1864	2386	2156	2134	2040	2304	4924	4846	4838	4756	4356	4472	5028	4798	4828	3258
1587	342.20321	11.13	341.196	1300	740	1218	954	622	1150	1088	1002	0	1472	1680	1490	0	1622	1692	1320	1094	1560	14528	14418	12478	9314	9688	8748	8208	8348	8002	1278	0	1038	0	1134	1008	988	1198	1226	4336	4352	4324	4712	4480	4540	5034	5726	5674	1096
1588	324.19311	11.19	359.163	1886	1938	2024	1990	1966	2036	1624	1814	1586	4514	4942	4180	6678	6472	6544	5776	5930	6210	74828	72396	58656	42440	40538	41572	40866	40526	38040	6434	6926	7024	8338	8370	8728	8042	8114	7790	12724	12758	14140	12700	12422	12574	15988	15618	15490	8054
1589	326.20840	11.16	325.201	2196	1814	1782	1864	1806	1844	2062	1898	1724	6164	6532	4466	8390	5402	0	6760	7136	5426	31344	31646	28698	25354	28750	26414	27780	27386	24708	4894	4132	4006	5084	4556	4234	4464	4558	4602	15718	17506	14874	16622	19214	21178	0	22024	0	3776
1590	458.13689	11.19	457.13	0	0	0	0	0	0	0	0	0	0	0	0	0	0	0	0	0	0	1378	1204	2136	11498	14532	15128	15662	17762	19316	0	0	0	0	0	0	0	0	0	0	0	0	0	0	0	0	0	0	0
1591	366.21119	11.15	365.204	1872	0	0	2168	1802	0	1878	0	0	4872	0	4568	5946	0	0	5368	4472	0	5428	0	3678	5304	2738	0	4966	4156	3666	0	4166	0	3954	0	3588	0	0	0	12636	16382	21692	25058	13400	20374	20028	31316	21742	3736
1592	174.01484	11.15	173.008	12288	10552	9560	11206	9200	9118	8740	7880	7878	4196	3532	4166	3250	3276	3224	2784	2946	2948	1290	1118	0	0	766	650	0	0	0	0	1038	1060	0	1162	0	964	0	0	0	0	390	174	138	268	170	214	148	0
1593	396.14659	11.16	395.139	0	1116	618	0	732	1156	0	1110	964	0	2440	0	3226	2968	3090	2914	0	2676	13978	11646	8678	5668	5092	4970	4784	0	4138	3170	3388	2490	4928	5410	5058	4740	5054	4918	5860	6414	5926	5698	5470	0	3608	0	7244	0
1594	130.02426	11.18	129.017	8492	7654	7382	7816	6764	7242	6456	6622	5806	2702	2892	2676	2616	2368	0	2332	2078	2196	1036	0	0	0	0	678	0	740	518	0	0	1090	0	996	0	0	0	820	340	0	120	390	326	470	384	294	414	0
1595	242.11478	11.2	241.107	552	370	396	352	0	346	254	0	260	0	0	508	0	0	354	0	238	0	514	620	0	0	0	282	124	282	0	0	0	392	0	0	0	262	360	0	488	596	470	0	0	702	650	612	822	238
1596	362.18328	11.2	361.176	2866	2778	2662	2416	2748	2584	2724	2414	2988	6730	7378	6356	9722	9524	9468	7548	6842	7558	169082	161528	128854	110298	105650	109574	105054	111950	102886	7172	7588	7886	10406	9314	9600	8690	8920	9690	13456	14230	14278	13614	14712	13952	15218	14958	16554	9786
1597	226.11947	11.22	225.112	420	228	362	294	466	340	268	288	292	578	718	444	0	0	508	396	500	550	504	0	540	774	408	494	290	338	406	538	250	162	334	254	456	296	364	0	0	0	0	0	1136	0	0	0	854	498
1598	174.12375	11.21	173.116	0	300	0	0	244	0	274	0	0	0	256	0	0	0	0	1048	208	0	0	1194	182	1118	150	0	890	1206	1010	0	0	0	0	0	0	630	0	0	130	1776	0	1072	1132	1438	0	1634	0	0
1599	267.82420	11.2	266.817	0	0	0	0	0	0	0	0	0	0	0	0	0	0	0	0	0	0	0	0	0	0	0	0	0	0	0	0	0	0	0	0	0	0	0	0	0	0	0	0	0	0	0	0	0	0
1600	97.96513	11.22	96.9579	8398	4966	3484	2742	2910	3326	2680	2888	2862	3654	3842	5096	4570	5110	4700	3484	3078	3806	6834	7646	14546	0	0	0	0	0	0	0	7932	5060	3570	3820	3546	2918	3060	2796	4558	4902	9852	9760	10078	12242	0	13788	12930	1196
1601	364.19675	11.22	363.189	2910	3276	3430	3318	3042	3546	2942	3316	3480	6594	7374	0	0	0	0	0	4840	7284	0	0	0	0	0	0	0	0	0	4634	4890	6110	6342	5904	4154	5680	0	6406	17902	17244	16364	15744	15276	16104	18614	17254	17734	0
1602	201.99155	11.2	200.984	122	88	144	242	86	324	284	276	280	96	186	0	136	116	294	352	196	236	1898	3274	0	0	15424	17474	16320	16474	15042	0	400	380	332	290	346	270	266	268	230	96	176	192	368	0	104	170	110	312
1603	104.00878	11.21	103.002	658	0	0	860	0	894	934	0	758	0	0	398	590	426	0	598	636	402	610	612	492	88	236	0	260	248	288	494	0	260	320	0	278	312	0	272	540	570	550	420	354	346	456	348	0	0
1604	156.00714	11.22	155	5308	4974	4316	3674	3274	3150	2916	2934	2766	2704	2488	2448	2120	1904	1858	1610	1576	1526	9606	11404	12644	15222	16308	15846	17996	17952	21110	7688	7268	6448	5660	5282	3918	2702	2446	2472	2400	1878	1800	1638	2026	1540	1222	0	1148	110
1605	346.23471	11.23	345.227	1112	860	968	734	714	0	720	698	772	1404	1020	1188	0	1414	1782	1186	992	1128	20080	17434	14744	10772	11838	10802	10046	10662	9236	782	1018	802	0	348	0	834	704	710	3018	3060	3270	3528	3024	3064	3570	3116	3858	0
1606	218.05404	11.23	217.047	0	0	0	0	0	0	0	0	82002	0	0	0	0	0	0	0	0	0	0	0	0	0	0	0	0	0	0	0	0	0	0	0	0	0	0	0	0	0	1310	0	0	0	0	1390	1232	438
1607	330.23913	11.25	329.233	18818	18266	16464	18718	18406	18366	14408	14942	14954	41700	42146	41004	46170	46128	46712	41090	42546	37278	47800	48950	39942	34148	37594	38396	33198	34348	33500	28114	27918	27756	31432	29726	31680	28348	29030	29614	105924	104914	107658	105620	103450	105874	117282	114910	114848	33836
1608	414.15784	11.27	413.151	504	0	442	0	0	0	0	764	0	942	0	0	1128	774	776	970	734	870	26164	25144	19376	15194	14732	14768	16130	14722	13884	1140	1372	1034	1608	1664	0	1334	1618	0	1838	2178	2130	1910	1308	1868	2268	2352	2456	2380
1609	158.09189	11.24	157.085	0	0	258	304	216	274	216	334	242	172	0	196	156	86	320	242	178	0	0	1314	0	1214	1414	0	1600	1608	1524	0	0	0	0	0	0	664	530	0	0	434	0	0	580	0	346	0	404	366
1610	328.22466	11.27	327.217	6608	5602	6744	7060	6932	6338	6216	3972	6340	0	0	0	0	0	0	0	0	0	0	0	0	0	0	0	0	0	0	0	0	14250	0	0	0	0	0	0	47326	48098	48066	47584	49490	50840	58102	52478	52250	0
1611	196.10870	11.29	195.101	782	614	588	228	650	652	700	622	624	1426	1246	1236	1424	1610	1578	1414	1428	1268	212	206	560	688	256	524	552	330	0	1792	1290	1180	1914	1686	1792	1670	1786	2002	2260	1978	2770	3032	432	600	2426	2900	2572	2380
1612	388.19793	11.25	387.191	3744	3652	3150	3964	4130	3622	3776	3950	3908	4332	0	12350	0	0	3820	11268	9958	0	2094	2098	0	1374	1418	1380	1040	1000	0	3530	4250	5238	5734	5094	0	0	5174	9736	0	0	0	0	0	0	0	0	6174	7418
1613	230.15095	11.27	229.144	4892	5330	4842	5300	5124	4418	4674	4710	5250	4790	5602	5496	7580	7452	7406	6610	7304	7918	5448	4422	5104	3818	4800	5680	3822	4216	3524	3356	3824	3320	4090	4204	5022	4010	3532	4204	23618	24080	24446	29048	27552	28214	28930	28144	29340	0
1614	238.01041	11.28	237.003	3152	2200	28328	24130	25712	27948	28170	0	0	0	4106	0	6292	6200	6622	5720	7328	7364	3344	2096	2204	2298	2298	1624	1990	1604	1556	0	1284	1776	2036	2400	2076	2578	2552	3212	1402	1512	1904	1828	2490	1972	2422	2214	2694	0
1615	398.16103	11.29	397.154	0	2124	1624	1814	2086	1594	1468	0	0	3056	2994	3346	5112	6220	5056	4602	4248	4108	23406	20080	14802	10388	9868	9512	8368	7708	7458	4086	4874	5378	6530	7762	7230	7158	6972	0	7836	7638	7558	6156	6352	0	7902	7920	8196	7578
1616	477.17753	11.31	476.17	0	316	248	0	0	0	0	0	0	0	0	0	0	0	0	0	0	0	0	0	0	0	0	0	0	0	0	0	0	0	0	0	0	0	0	0	0	0	0	0	0	0	0	0	0	0
1617	282.18164	11.29	281.174	460	596	512	520	606	534	472	0	380	716	1000	0	674	598	804	640	678	672	2142	1988	1800	0	2298	2016	1380	1904	1506	566	514	600	0	310	606	408	262	442	1900	2458	1982	2378	2032	2360	2470	2250	2590	1362
1618	344.21844	11.31	343.211	1088	1204	1614	1048	1044	900	1036	0	1112	1008	0	0	1748	1852	1858	1614	0	0	30744	28566	21540	17442	18054	18954	18160	15800	15342	1406	1304	1512	1178	1442	1156	1362	1228	1136	6034	4740	5988	4844	5414	4710	5890	5412	5270	0
1619	306.18315	11.32	305.175	1526	1866	1658	1880	1428	1642	1592	1762	1768	5048	4986	5436	8392	8868	7844	8376	8364	7796	69178	68548	55394	50312	53144	53874	45996	47880	47158	5118	5880	5638	6248	6632	5260	5210	4962	5576	15580	13804	13076	14552	16038	14994	15286	15740	16644	4326
1620	538.25300	11.31	537.246	1000	790	862	0	878	896	766	1040	592	1078	818	932	826	1158	860	820	0	0	1192	0	952	948	1132	0	898	1138	1162	0	0	0	310	0	366	0	0	386	0	1372	0	1038	0	968	1078	0	0	21624
1621	301.93647	11.32	149.961	0	0	0	2808	2422	1488	960	1106	0	0	1020	944	0	974	0	0	904	0	0	866	1172	1620	1846	1802	1550	1416	1620	0	448	424	248	242	218	120	96	268	358	262	450	458	336	424	0	310	0	0
1622	217.98714	11.32	216.98	0	0	0	0	0	0	0	0	0	18760	15388	12650	9066	8726	8370	7706	7524	6880	12072	0	0	0	0	0	0	0	0	0	0	0	0	0	0	0	0	0	7614	6428	6342	5544	5658	5680	5060	5108	5014	2826
1623	592.23901	11.34	591.232	0	0	0	0	570	390	0	0	0	0	0	0	0	0	570	0	0	0	0	0	0	0	0	0	0	0	0	0	0	0	0	0	400	0	0	0	0	0	0	0	0	0	0	0	0	7556
1624	192.02524	11.34	191.018	0	30468	0	16958	0	0	8636	7760	6500	11210	12302	12456	0	0	10694	9250	8974	9060	6630	7036	5518	4558	3932	3070	2174	2082	1688	0	1160	0	0	0	1078	1240	1226	1196	0	0	0	1290	0	0	956	0	0	0
1625	86.03468	11.34	85.0274	3142	2868	2850	3016	2442	2498	2604	2276	1930	1158	1360	0	0	0	0	1148	1038	1014	0	0	436	314	280	528	358	264	288	242	504	582	0	458	474	396	296	408	254	164	180	176	260	228	126	0	162	132
1626	208.10851	11.35	207.101	416	0	0	206	0	0	0	0	0	0	0	0	394	0	0	320	208	0	0	0	288	270	546	312	0	246	0	0	392	0	532	714	620	454	0	0	0	0	0	0	822	0	0	0	1020	0
1627	212.14006	11.38	211.133	776	0	646	662	404	0	470	528	622	944	1074	1152	1078	1178	798	1046	1142	944	0	0	0	0	564	0	0	676	0	1280	260	834	864	882	844	1096	672	948	1158	1416	1406	1528	1804	1790	1528	1758	1680	702
1628	308.19799	11.37	307.191	2796	2362	2086	2316	2784	2318	2294	2294	2544	9128	9906	9756	16380	14916	16414	13228	13396	13892	74498	71478	64628	57588	57208	61430	55924	58300	59038	6474	6772	6968	6752	7612	6534	6048	6102	5802	24698	26926	25988	27300	29868	29604	30712	32326	30932	7850
1629	294.18257	11.37	293.175	4482	5364	5070	3892	4026	4068	2950	3178	2894	10876	11126	10894	7690	8072	6698	11620	11286	11758	5598	5030	4928	5462	5918	6398	5850	5460	5870	11058	12262	12014	10162	10878	11810	9018	8444	9306	6324	5646	6900	2292	2772	1560	6306	7188	7224	7092
1630	258.14559	11.36	257.138	526	394	336	0	434	256	0	0	370	392	726	768	776	404	872	206	896	214	0	0	0	0	0	0	0	0	380	0	0	364	0	0	300	282	152	0	430	0	714	654	466	700	904	574	704	352
1631	254.15082	11.39	253.144	974	1222	770	924	826	910	746	1062	800	968	1106	906	2348	2598	2118	2622	2392	2884	14636	14184	12836	11826	12158	12198	12354	13048	12390	1044	784	1010	1150	792	960	1036	880	1076	3826	3778	3428	4808	4020	4764	4604	4904	4746	516
1632	247.99792	11.38	246.991	5572	6524	7660	6948	7494	7618	7174	7686	7262	3192	3424	3474	3310	3300	3886	2836	3210	4156	0	0	213074	0	0	0	0	0	0	13380	0	0	0	14204	15202	0	13396	0	3234	2764	2668	2536	2574	2870	2352	2282	2018	0
1633	262.01339	11.39	261.006	2378	1758	2094	2796	2710	2692	3328	3016	3490	2882	3728	5222	4726	5118	4066	3402	3754	5686	4126	1410	1674	0	0	0	0	0	1002	0	0	1280	1380	0	0	0	1084	684	448	426	0	0	420	524	0	468	0	0
1634	396.14865	11.42	395.141	1126	960	1248	0	1328	900	1202	1082	0	2602	2162	1986	3188	2922	3028	2836	2772	2474	14526	11644	9094	6422	5608	6136	5638	5546	4528	3164	4150	3342	4084	4946	5438	4704	4400	3896	3774	6170	4610	4416	3648	5296	7248	7100	6268	2424
1635	352.22389	11.39	351.217	4800	4622	5346	4738	4808	4640	4152	4454	4428	21568	23260	23552	17670	18518	18716	18344	17098	17384	3392	3326	2908	2616	2364	2382	2128	2116	2296	9002	9972	9608	9058	9816	10518	8410	9710	10154	27546	25974	25656	28460	27726	28660	31782	31186	33194	2542
1636	350.20857	11.4	349.201	2464	2484	2006	2136	2414	2654	2444	1858	2000	5272	4366	5200	6248	5860	6314	6214	6054	6496	2484	1728	2174	2292	1512	1672	0	1940	0	3632	3618	3670	4756	3990	3904	4096	3844	4018	13688	13696	13262	14190	15010	14278	14830	16346	15066	1592
1637	344.17443	11.4	343.167	1692	1262	1676	2238	1900	2322	1996	2154	1748	4708	4566	4170	7638	8044	7558	7298	8034	7472	13496	11846	8490	6250	6060	5646	5168	4932	4072	2446	2466	3216	3314	3230	4186	3316	3478	3818	21742	23638	24056	22548	23152	22824	27022	28254	29238	2908
1638	370.23492	11.41	369.228	3882	3290	4784	3602	3966	4208	3390	3366	3392	4208	0	0	0	0	5784	0	0	12010	1860	0	1660	1778	1786	1496	1282	0	1268	8794	9008	9134	0	6348	0	6350	5070	0	18328	18132	18180	18434	20190	17152	20804	20300	21728	2572
1639	201.99284	11.4	200.986	228	148	326	274	352	0	294	330	230	130	222	100	300	236	306	238	356	232	2084	4618	0	14448	0	0	10360	0	0	0	0	0	416	400	360	0	366	330	140	0	0	0	170	0	268	0	0	180
1640	330.23914	11.46	329.233	3648	4522	0	4434	0	0	0	0	4300	0	0	0	0	0	0	0	0	0	64084	60882	50204	43354	47914	47838	41680	39978	42308	0	0	0	0	0	0	0	5674	4830	0	0	0	0	0	0	0	0	0	0
1641	312.19325	11.47	311.186	6290	6792	6798	5096	6650	5668	5048	5764	5312	9410	10688	9066	5418	6300	5936	4794	4922	4788	31168	29820	26260	22360	22974	22984	21592	20298	20766	1876	2206	2256	2334	2524	2512	2116	1976	0	62566	56894	56136	53352	52882	51824	65622	57772	59728	582
1642	158.09222	11.45	157.085	0	618	496	464	244	398	232	350	362	320	278	336	232	192	166	294	248	144	932	1266	1358	1142	1440	0	1380	1568	1594	1186	0	696	0	0	0	420	396	392	0	470	470	0	414	0	396	0	0	256
1643	352.21659	11.48	351.209	0	0	0	0	3458	0	0	3536	3080	0	0	0	0	0	0	0	0	0	0	3164	0	0	0	0	0	0	0	0	0	0	0	0	0	0	0	0	0	0	0	0	0	0	0	0	0	0
1644	174.01441	11.47	173.007	11942	10446	0	10766	9476	8644	8526	7962	7524	3918	3636	3286	2770	2950	2762	2798	2606	2616	1348	1240	0	908	724	0	0	0	0	598	1154	0	1166	0	1262	858	648	0	400	184	254	284	0	300	282	212	230	0
1645	310.21353	11.49	309.206	3750	3324	3516	4004	3636	3696	3092	3744	3550	7190	7656	7698	9714	0	9916	10306	8976	6270	66644	66936	56984	54206	54162	58594	47624	56290	54506	7026	6448	6370	6652	7488	7126	2076	6964	6836	23316	22596	23138	0	26186	0	26454	27322	27726	5006
1646	186.12412	11.48	185.117	526	1386	1124	1164	270	1136	1046	1206	928	84	2224	288	1496	1764	1920	1936	1976	286	576	568	622	592	536	530	690	546	410	1378	1668	2104	1714	1956	1606	1602	1542	1746	10422	8738	9760	11886	12398	12544	12036	12058	13686	2316
1647	380.19605	11.49	379.189	686	926	1088	808	612	932	796	856	740	1014	0	0	1120	904	0	0	0	1184	16434	16872	13392	10292	9504	9750	9126	9528	8782	1050	0	0	1118	0	900	866	916	0	3934	3678	0	0	3274	3912	4924	0	0	830
1648	354.23796	11.53	353.233	7974	7712	7858	7802	8164	7882	6880	7174	6634	32438	33382	32210	34804	34848	35174	38248	36302	37538	5376	4410	3676	3466	3518	3564	3238	3098	3248	10938	11512	11226	13514	13474	13900	12538	12388	11562	29150	29262	28250	29648	30740	29166	30976	32572	32058	3456
1649	318.15913	11.54	317.152	1488	0	978	0	0	1026	0	928	808	644	954	576	854	738	864	832	950	0	3178	3724	2702	2462	2296	0	2346	2816	3098	822	672	774	0	952	1084	896	1028	936	4144	3620	3524	3830	4240	3582	3652	3632	5302	4430
1650	334.21463	11.55	333.207	0	3440	2802	3528	3422	3674	3246	0	0	15226	14800	0	16906	17892	0	0	0	0	5452	0	0	3550	0	3640	1816	2418	0	4438	0	5644	7520	0	7382	0	0	4622	0	0	0	0	0	0	0	0	0	0
1651	232.00296	11.56	230.996	5176	9406	10320	7562	7930	7606	7272	8010	7530	4698	8642	9524	8562	9460	9598	10556	10700	11582	6690	5424	6406	8100	7720	9420	10450	10146	0	3938	4112	3772	5024	5078	5170	5050	4994	5266	2500	2306	2430	2644	2098	2694	2012	1896	2116	1192
1652	104.00841	11.52	103.001	562	662	718	706	0	0	0	978	0	1024	590	716	366	786	754	530	656	562	0	320	258	290	222	244	202	228	196	296	284	544	366	214	472	306	482	424	378	384	402	252	518	514	458	428	424	0
1653	340.18906	11.54	339.182	0	0	580	0	0	0	606	0	0	0	0	0	0	0	0	0	882	1352	4424	3542	3554	2672	2168	2148	2608	2600	2954	980	964	0	1002	858	0	870	788	742	2474	2888	2650	2640	2738	2952	2838	3050	3268	638
1654	170.09185	11.53	169.085	4502	3146	2978	2696	2438	1676	1598	1282	1252	1638	2232	1630	1298	1310	1480	1644	1178	1496	1014	654	724	406	0	0	438	356	458	354	896	1150	1262	402	286	922	200	246	1646	1686	2218	2136	1848	0	2106	2330	0	3426
1655	346.18619	11.53	345.179	0	0	0	0	0	0	1442	0	0	2252	0	0	0	5942	7106	4314	0	3750	0	0	7586	5190	0	5736	3854	4016	3158	1778	0	0	2048	2180	2498	0	2184	2918	0	0	9946	0	0	0	13998	9946	0	3884
1656	174.12413	11.54	173.117	2144	2618	2236	1860	1958	2034	1710	2136	1794	1332	434	1276	994	1306	1024	280	1016	1012	1002	310	1218	218	996	1010	220	332	406	436	550	972	618	844	480	196	702	650	1494	236	1528	272	146	236	1540	226	1668	1964
1657	344.21885	11.56	343.212	0	804	954	872	0	810	0	1088	0	1524	0	0	0	0	0	0	0	0	26696	25130	20418	18018	17216	16886	16056	15610	14434	1680	1262	0	0	1034	0	1242	0	0	0	0	0	0	0	0	0	0	0	0
1658	352.21396	11.54	351.207	0	0	0	0	0	0	0	0	0	0	0	0	0	0	0	0	0	0	0	0	0	0	0	0	0	0	0	0	0	0	0	0	0	0	0	0	0	0	0	0	0	0	0	0	0	0
1659	126.10226	11.51	125.095	1194	1224	1338	980	602	834	688	322	378	570	538	492	486	418	428	476	402	420	364	136	252	192	216	146	270	120	144	394	120	464	134	110	296	184	472	132	58	254	250	132	238	244	226	234	670	1008
1660	127.90979	11.54	126.903	2168	1964	1680	1680	0	0	1698	1536	0	1376	998	1066	0	0	1284	1096	1162	1326	1738	1802	1704	1642	1528	0	1694	1552	1418	1670	1512	1698	1866	0	1862	1746	1634	1658	0	0	0	0	0	1156	0	0	0	0
1661	247.99754	11.57	246.99	5950	6170	6716	7016	7354	7378	6902	7556	6574	3282	4336	3364	4298	3478	3410	2888	3232	3252	0	0	0	0	0	0	0	0	0	0	0	12666	0	0	0	12756	13014	0	2914	2692	2494	2430	2346	2096	2476	2222	2208	0
1662	192.02541	11.59	191.018	36022	0	23296	0	0	0	8722	7270	6558	10572	0	0	0	9122	0	8514	8768	0	7204	7280	5248	4264	3292	2628	2032	1956	1708	1372	1364	0	0	0	1088	0	1092	0	0	1310	0	1146	1122	938	608	0	786	0
1663	362.18538	11.59	397.155	1764	1674	716	1936	906	1944	1766	1902	2068	2106	2892	3304	2816	5320	4600	0	3520	4350	0	0	0	0	1806	1244	3412	0	0	5506	5894	5950	0	8690	8058	7656	8078	8124	7158	7096	7290	6012	5790	0	6932	7670	7966	9598
1664	258.14610	11.62	257.139	472	496	480	0	492	0	0	0	244	792	0	0	438	622	0	704	144	952	0	0	0	0	0	0	0	0	0	0	0	0	0	0	0	0	0	0	0	0	308	0	328	0	0	0	0	0
1665	346.19006	11.6	345.183	9918	9944	9232	10338	10794	10198	8714	8824	10140	6310	5964	6506	14546	12724	14210	11434	14948	13058	11364	9636	6960	5130	5550	4468	4450	3912	3958	6268	6982	6526	8968	8816	9372	7488	9266	8850	46386	46682	46258	41696	41134	41330	52270	56038	54968	4064
1666	188.10316	11.59	187.096	0	432	508	304	396	236	238	320	298	370	340	426	390	284	236	242	410	326	474	366	484	0	558	600	0	250	488	396	152	0	334	162	220	322	0	250	628	0	0	794	0	0	778	0	0	480
1667	208.10871	11.62	207.101	420	0	318	562	0	454	0	0	0	0	0	0	428	332	336	596	310	386	0	244	140	172	0	258	224	284	280	304	210	308	0	528	502	552	456	244	454	380	588	476	368	518	0	0	696	416
1668	308.19714	11.64	307.19	2128	1902	0	2196	1912	1792	1580	0	2190	4994	4810	3330	4926	7728	7516	4576	6902	5538	6484	0	0	0	0	0	0	0	6692	5408	5304	5310	5750	4842	5324	4674	4940	4570	17096	16388	0	18844	17696	17582	18046	19680	19068	3278
1669	264.17173	11.67	263.164	0	202	0	0	0	0	0	0	0	1544	1494	1926	1120	1244	1276	1044	998	1072	10620	11212	10372	10266	10062	11532	9476	9514	9724	368	398	498	414	246	250	416	0	0	1750	1400	1220	1610	1526	1610	1544	1526	1698	600
1670	388.19997	11.66	387.193	6004	5954	6390	6724	6504	6734	6254	5966	5884	15008	15390	14570	16064	15358	17020	16242	16050	16180	2378	2054	1388	1430	0	1238	1450	1284	1280	11552	12502	12622	14906	15678	14138	13596	13904	14166	15980	17502	15508	17860	16652	16630	18630	19988	18178	3430
1671	217.98714	11.66	216.98	0	0	0	0	0	0	0	0	0	0	15004	0	9558	9300	9864	8228	0	7438	0	0	0	0	0	0	0	0	0	0	0	0	0	0	0	0	0	0	0	6712	6560	5844	6192	5924	5262	4940	5410	2554
1672	310.21319	11.63	309.206	0	3506	0	0	0	3956	0	0	0	0	0	2802	0	0	4682	0	0	0	0	0	0	0	0	0	0	0	0	0	0	6360	0	0	0	7448	0	0	0	0	0	0	0	24700	0	0	0	6606
1673	86.03472	11.65	85.0274	2810	2786	2244	2484	2830	2444	2456	2832	2432	1084	1272	1140	994	0	1044	1166	976	1064	590	572	324	390	328	184	418	274	182	260	288	0	468	0	464	0	160	324	216	178	164	272	196	202	134	240	194	0
1674	354.23841	11.71	353.233	11152	9158	9598	8386	9600	8360	8104	9380	8522	30432	29690	30628	29886	30780	30560	34424	34822	35646	3132	0	2122	1718	2686	1826	3082	1782	1822	13586	15588	14286	16162	18452	17696	17178	16638	16548	0	0	0	0	0	0	0	0	0	4944
1675	127.91025	11.72	126.903	0	1900	1998	1608	0	0	0	0	0	0	0	0	0	0	0	0	0	0	0	1516	1890	1800	0	0	1776	0	1648	1882	1580	1594	1666	0	0	1862	0	0	0	0	0	0	0	1128	0	0	0	0
1676	370.19057	11.72	369.183	2842	2898	3054	4078	3634	3228	3574	3376	2872	9292	8946	7202	10496	10944	10634	11626	11400	11814	1728	0	1104	886	0	994	942	0	0	3658	4270	4998	5040	5286	5230	4888	5230	5602	18306	18262	19154	21158	17898	18268	22844	22302	20840	2358
1677	328.22422	11.72	327.217	2480	2382	2332	2492	2556	2546	0	0	2430	0	0	3598	3220	3192	3820	3722	3184	4278	0	0	0	0	0	0	0	0	0	4778	4360	3026	2790	0	3486	3236	3384	4216	0	0	0	0	0	10400	0	10964	0	4220
1678	186.12439	11.74	185.117	1414	0	0	0	1450	388	0	0	0	1750	0	2088	222	0	0	434	186	1648	474	550	0	0	0	562	490	486	476	314	0	248	0	232	0	0	0	0	0	0	0	1332	0	0	0	0	0	0
1679	296.19810	11.7	295.191	1388	1464	1372	0	1172	1088	1128	1084	1192	2566	2686	2622	1378	1404	1328	1052	1434	1362	12864	15378	13322	11662	12712	13086	11448	12540	12266	792	674	546	738	986	900	480	788	636	13194	12386	12356	11488	12138	12490	13152	14664	14464	0
1680	126.10236	11.72	125.095	0	888	0	0	970	0	270	474	322	362	292	272	0	218	236	112	174	224	178	214	0	262	0	0	136	136	152	236	0	0	0	126	0	124	0	0	70	170	244	0	240	204	256	0	0	0
1681	170.09206	11.74	169.085	3186	2386	2008	2076	1686	1392	0	964	0	0	0	0	604	0	0	376	0	0	0	0	0	422	314	0	310	0	280	402	232	0	200	460	256	332	356	194	0	0	0	0	0	516	326	518	490	308
1682	340.18864	11.75	339.181	0	0	0	0	0	0	0	0	0	0	0	0	0	0	0	0	0	0	0	3128	0	0	0	0	0	0	0	0	0	0	0	0	984	0	0	814	0	2554	0	2328	0	2614	2492	2830	3110	868
1683	334.21409	11.76	333.207	4894	4110	4550	4394	5724	4162	4078	4256	4652	15310	15904	15012	18050	18834	19428	19926	20188	21178	5124	4676	3964	3164	4168	3264	3606	3418	3498	7408	7362	7154	8346	7638	7578	6504	7048	6870	24954	24706	24486	26896	27848	28012	29218	28798	28738	2712
1684	266.18708	11.8	265.179	1734	0	1642	0	0	1580	0	0	1406	3148	2504	2922	2398	2392	1988	1906	2196	2222	4242	4538	4194	4280	5684	4126	4304	3648	3930	1496	1486	1586	1350	1350	864	1214	1348	1390	9924	10040	8950	8808	8746	9536	11904	10620	10706	6664
1685	320.17459	11.78	319.167	2166	1560	1668	1618	2306	1912	1786	1564	1668	1230	1692	1362	1354	1460	1560	1106	1222	1156	19102	18220	14802	13808	12240	11500	11734	12110	11572	1528	1684	1532	1898	2140	1946	1620	1890	1776	3800	3570	8932	7584	7932	6864	8978	8550	8780	4768
1686	356.15230	11.77	355.145	672	0	820	836	538	896	782	1054	890	770	0	630	874	828	982	620	0	560	7456	5824	4354	3218	3808	3080	2890	2850	2528	676	662	584	0	916	1040	710	828	498	3108	2466	2904	2692	1716	2130	2962	3060	2544	2144
1687	214.11860	11.77	213.111	408	0	926	860	754	998	986	1262	874	894	1148	1308	1488	1870	1340	1068	1216	1270	0	406	0	0	356	440	0	0	342	262	0	1214	934	0	0	886	1176	314	0	0	0	0	0	0	0	0	0	0
1688	312.22888	11.79	311.222	4528	2784	0	0	4592	3574	3764	2594	3422	6758	5466	3062	0	5810	0	0	5346	5246	0	0	17748	0	0	0	0	0	0	3896	6490	0	3286	6652	3174	4208	7422	3710	0	0	0	0	0	0	0	0	0	4378
1689	188.13968	11.76	187.132	1694	224	1456	1718	1378	242	1176	1646	436	1342	832	1246	698	746	216	1370	1664	1048	1624	1348	1446	1084	1078	1010	1160	1120	1260	646	454	706	800	614	502	512	564	628	978	1206	1070	1146	1160	954	0	1084	1510	2346
1690	184.10828	11.77	183.101	0	0	0	0	0	0	0	0	0	444	376	454	284	0	0	200	224	432	456	0	160	416	0	302	316	430	902	0	0	0	0	0	376	0	0	0	396	512	0	552	802	0	0	0	0	294
1691	578.23747	11.79	577.23	0	0	0	0	0	0	0	0	0	0	0	0	0	0	0	0	0	0	2386	4604	14346	16402	16090	17352	16918	16076	16678	0	0	0	0	0	0	0	0	0	0	0	0	0	0	0	0	0	0	1972
1692	326.20750	11.77	325.2	0	0	0	0	0	0	1962	0	0	0	0	0	4038	3004	3566	2906	3002	4318	11940	12324	0	9108	0	9850	10328	10190	0	2884	0	2490	0	2666	2728	2726	2412	2498	8860	9492	10282	8606	9894	9462	9564	10222	10162	2902
1693	330.23987	11.78	329.233	2564	2480	2058	2044	1908	3020	2482	1692	2764	0	3346	0	3116	7756	0	3748	3156	4008	113706	113902	100194	79342	81038	82900	70490	72584	72284	3564	2860	2840	3306	2940	2940	2728	2610	3002	0	0	0	0	6036	0	0	0	0	0
1694	267.82411	11.79	266.817	0	0	0	0	0	0	0	0	0	0	0	0	0	0	0	0	0	0	0	0	0	0	0	0	0	0	0	0	0	0	0	0	0	0	0	0	0	0	0	0	0	0	0	0	0	0
1695	308.19811	11.82	343.167	2334	2172	2436	2280	2490	2772	2022	1920	2300	6770	6326	7334	10984	12146	13076	11250	11472	14454	11302	9958	8536	7352	7002	7820	7774	7124	6826	6550	6654	6854	8444	9140	9778	7984	7522	7354	21904	26122	21994	21950	23942	24416	27200	24960	26754	1804
1696	350.20875	11.82	349.201	2182	2572	2586	2694	4820	2250	2086	4728	2742	3774	3962	4714	4646	4622	4590	5446	6094	5308	39042	2984	33304	3840	29360	4090	2554	2754	3380	3734	3438	3064	4090	3672	4342	3674	3720	3542	26294	25730	24922	27334	26210	26510	27000	27844	26388	0
1697	310.21362	11.81	309.206	3188	2894	3188	2856	2790	2980	2988	2738	2714	5642	5722	6526	7380	10098	9628	8920	0	10598	41630	42218	39732	33838	34922	35608	31302	31458	35546	6072	6190	5176	7188	6024	5906	5580	5604	6026	0	0	0	24984	0	0	0	0	0	5948
1698	386.94711	11.84	385.939	0	0	0	0	0	0	0	0	0	0	0	0	0	0	0	0	0	0	0	0	0	0	0	0	0	0	0	0	0	0	0	0	0	0	0	0	0	0	78	0	0	0	0	0	0	0
1699	282.18178	11.85	281.175	558	514	396	394	0	390	344	332	466	596	0	436	394	462	288	490	262	432	15574	13942	11918	12508	11594	13054	12588	13742	12338	638	414	332	370	326	370	538	0	0	604	0	0	0	0	1376	0	0	0	1510
1700	188.10380	11.83	187.097	0	0	436	400	416	368	294	288	272	658	546	0	354	310	372	468	0	318	474	586	0	658	412	706	510	570	550	226	352	260	220	260	338	238	352	318	458	702	0	550	608	0	0	772	0	614
1701	692.32129	11.88	691.314	0	0	390	0	0	0	0	0	0	0	0	0	0	0	0	0	0	0	0	0	0	0	0	0	0	818	0	0	0	0	0	0	0	0	0	0	0	0	0	0	0	0	0	0	0	0
1702	138.02947	11.85	137.022	2284	2540	2650	2622	2688	2752	2768	2902	2670	1298	0	0	0	928	940	0	0	862	1296	1636	3150	4638	4940	6862	6864	8424	8350	1484	1840	1614	0	2194	2672	2118	1976	2264	0	0	0	754	0	0	0	984	0	566
1703	112.01413	11.83	111.007	0	6658	5348	4566	4026	3300	3908	3610	3354	2802	3258	2938	2356	2448	2598	2360	2288	2204	2218	1564	1844	1276	1260	1120	1130	1076	0	868	820	0	1086	0	834	0	858	0	884	910	1202	0	1146	0	930	1084	0	0
1704	192.02560	11.83	191.018	0	0	0	0	12170	0	8476	7088	7522	9652	9742	0	9158	8392	9940	7566	8296	0	7222	6448	5140	4376	2968	2570	2026	1804	1504	0	1248	0	1016	1186	0	890	1030	1404	1192	1184	1250	0	1106	1160	934	952	0	280
1705	201.99290	11.84	200.986	370	396	466	344	402	454	402	312	250	158	238	216	386	186	248	288	418	260	2502	0	12610	14090	12746	0	6790	0	3178	0	0	492	416	294	368	266	384	340	150	0	148	168	202	118	0	266	298	284
1706	130.02435	11.86	129.017	8120	7214	6892	0	6172	6148	6134	5804	5356	2594	2246	2046	2192	2074	2000	2588	1862	1796	1182	0	0	0	0	0	0	0	0	0	0	1162	0	0	0	0	0	0	566	512	330	308	0	480	340	288	278	0
1707	217.98741	11.89	216.98	0	0	0	0	0	0	0	0	0	0	13510	0	9338	9446	8616	8416	8238	8236	18004	33612	0	0	0	0	0	0	0	0	0	23098	0	31096	34152	0	31414	0	7858	6606	5470	6236	5754	6230	5108	4920	5442	2696
1708	311.81345	11.88	310.806	0	0	0	0	0	0	0	0	0	0	0	0	0	0	0	0	0	0	0	0	0	0	0	0	0	0	0	0	0	0	0	0	0	0	0	0	0	0	0	0	0	0	0	0	0	0
1709	174.01482	11.87	173.008	9870	10152	9570	0	7856	9100	8330	7678	7074	3418	3336	3430	3528	2550	2518	2546	2578	2612	1172	1276	1086	722	790	0	0	0	0	388	0	1130	0	0	838	592	0	556	370	298	176	306	248	354	214	206	218	0
1710	232.00207	11.84	230.995	6324	8362	9110	7830	7360	8234	7202	7820	7550	4544	8042	0	7836	9210	10028	10812	0	14172	6766	5534	7190	8378	8344	9980	0	9964	11124	4718	4580	4192	5180	5238	6084	5432	4840	5410	2512	2718	2322	2194	2188	2340	2024	1746	2014	1174
1711	372.20504	11.89	371.198	3368	3620	4150	3834	3986	3966	3784	4172	3698	3528	0	0	11942	0	0	12502	0	13150	1564	0	1090	1078	934	1222	0	960	0	3968	4256	0	0	0	4610	5080	0	5530	13908	13530	12812	12366	13556	13012	15070	15328	14684	2102
1712	127.91012	11.88	126.903	2162	1912	1824	2094	0	1472	1442	1366	1222	0	1252	1042	1100	1208	1114	1192	1380	0	1384	1500	1744	1650	1724	1626	1636	1788	1630	0	1932	1932	2062	1874	2114	1858	1908	1958	1088	1096	0	0	0	1200	0	0	0	1318
1713	228.09651	11.85	227.089	0	0	0	0	0	0	0	0	0	0	0	0	0	0	0	0	0	0	1026	378	0	190	230	0	0	0	256	0	0	0	0	0	0	0	0	0	1182	1268	1146	0	0	0	0	0	1462	440
1714	332.19588	11.91	331.189	1062	1390	1214	1186	0	1470	784	1130	1224	4386	3988	2888	2472	2688	5864	2974	2598	3290	3334	2086	812	1416	1728	1864	1606	1406	1832	2358	1862	1880	2000	2150	1402	2002	1722	1312	5974	3282	6628	6820	7530	7244	7580	7422	7600	678
1715	310.21412	11.93	309.207	0	3006	0	3304	0	0	2066	0	2150	0	2418	6182	4836	9702	8058	8272	0	8282	0	0	0	0	0	0	0	0	0	0	0	6502	6532	2588	6122	2172	0	2404	0	0	7880	23288	0	9590	10578	0	0	7860
1716	312.22937	11.93	311.222	4658	5416	4384	4668	4710	4654	4860	4240	4232	8668	9080	9080	10182	10618	10834	11472	10568	10396	48448	50052	45474	38218	40010	42110	36070	39274	37016	7050	7484	6378	8300	7874	8672	7284	6984	7996	31902	32456	31420	32372	35270	34772	35804	37356	36204	10070
1717	346.19037	11.92	345.183	8198	6556	6426	8160	7912	7222	5858	6196	6992	17960	16216	15190	23194	23734	24400	24096	22822	24078	30148	25842	21390	18206	17712	19176	18324	19912	19762	17174	19486	19930	26976	25578	25948	22488	22286	22812	52268	46494	47844	48692	48408	45428	55420	55860	53512	19154
1718	146.09245	11.93	145.085	776	536	518	584	0	464	542	506	0	1706	1610	1788	1264	1260	1388	1278	1274	1068	0	292	438	568	406	306	250	226	234	274	306	312	256	164	388	240	282	172	0	324	406	0	364	368	352	276	178	228
1719	302.16343	11.96	301.156	0	0	0	0	630	402	0	0	0	0	844	904	0	904	406	0	524	582	0	0	0	0	494	0	0	0	0	0	0	0	0	0	0	0	378	0	0	0	1600	0	1132	0	1438	0	0	1632
1720	328.22457	11.92	327.217	2682	2790	2516	2814	2476	2840	2580	2246	2464	2736	2946	2132	4142	2864	3054	2824	3000	2964	118516	118962	97388	79778	76786	79528	75060	73174	72500	4238	3924	2584	2526	0	2990	2486	2498	2924	10206	11570	10572	10330	11668	7432	11382	11034	0	2478
1721	214.11910	11.96	213.112	914	1106	300	288	392	712	576	418	254	206	474	432	360	570	570	410	264	416	498	330	318	264	446	190	418	200	280	266	324	194	394	340	190	370	132	194	518	598	648	660	0	864	908	0	0	330
1722	104.00865	11.94	103.001	0	0	0	846	880	0	768	0	0	0	0	0	560	616	0	434	588	674	0	0	452	316	172	400	286	326	404	368	238	410	200	478	484	428	662	480	442	396	540	334	0	340	0	380	468	0
1723	135.89935	11.95	134.892	0	0	0	0	0	0	0	0	0	0	0	0	0	0	0	0	0	0	0	0	11758	0	0	12576	11420	10458	10120	0	2796	4476	3340	5740	4558	3062	4472	4668	0	0	0	9368	0	7264	6308	0	0	276
1724	364.20073	11.98	363.193	1450	1592	1666	1260	1826	1598	1790	1680	1730	0	1974	0	1988	1850	1766	0	0	0	34186	33360	23584	18726	19798	18324	18534	19116	18138	1034	0	1638	0	2064	2050	1174	1932	0	6052	4590	4450	0	4552	4252	5728	2714	6314	1942
1725	336.22941	11.95	335.222	5726	5046	4378	4754	4894	4638	4776	4768	4486	16128	16806	17344	21294	22284	23280	22720	21986	23504	3558	3678	3140	2976	0	3320	2972	2768	2980	6032	6100	6910	6656	7044	6118	5572	6222	5974	15954	15952	15246	18646	18008	18776	20530	19670	19826	1788
1726	354.24028	11.97	353.233	3468	0	3998	3874	0	0	2244	3226	0	0	0	0	5466	0	0	0	0	0	2608	2410	2082	0	0	0	1916	1640	1620	5318	0	0	3160	2944	0	3134	0	0	14752	12380	13700	16014	17248	15594	15938	15330	16602	0
1727	267.82422	11.98	266.817	0	0	0	0	0	0	0	0	0	0	0	0	0	0	0	0	0	0	0	0	0	0	0	0	0	0	0	0	0	0	0	0	0	0	0	0	0	0	0	0	0	0	0	0	0	0
1728	286.21345	11.98	285.206	2064	1928	2510	2208	1856	2012	1912	2192	1926	1644	1492	0	1616	1292	0	0	0	1214	12214	12824	11026	10444	11354	10072	9046	9684	9244	1928	1604	0	1196	0	1206	1130	1042	0	3146	4062	3526	3436	3526	3672	3614	3912	3454	1242
1729	292.20350	12.01	291.196	3396	3126	2906	2948	2498	2644	2032	2354	2434	32512	31984	31300	40894	38048	41468	38474	38330	40540	25482	26504	25616	21142	23556	23494	23568	23638	23842	10362	10602	11078	11530	12220	10696	9944	8732	8552	27770	29944	31100	32782	35964	33926	35146	35884	34730	2282
1730	334.21407	12.02	333.206	3798	4050	2492	3202	3822	2906	3322	3030	3486	9166	10148	9594	11144	6848	6962	6682	0	0	4910	0	2464	2350	2140	1466	1720	1708	1202	5012	5588	6346	6628	5992	5714	0	5108	6152	0	0	10452	0	0	11584	0	0	12170	1570
1731	228.09897	12.01	227.092	0	0	0	0	0	0	0	0	0	0	0	0	0	0	0	0	0	0	0	0	0	0	0	0	0	0	0	0	0	0	0	0	0	0	0	0	0	0	0	0	0	0	0	0	0	188
1732	350.21688	12.03	349.21	3078	2230	0	0	3140	2290	0	0	0	0	0	0	0	0	0	2308	0	0	5102	5350	0	2602	3058	3398	2476	2324	0	0	0	0	0	0	0	0	0	0	0	0	0	0	0	0	0	0	0	10484
1733	268.20289	12.03	267.196	10180	8984	8586	9230	8042	7798	6284	6854	7278	13026	12078	13488	10208	9938	9916	9490	10268	11036	13418	14790	12466	11318	11456	13102	13470	12880	12650	2700	2970	2702	3034	2878	2788	2546	2462	2638	39932	38146	40890	34940	34662	34532	39232	38842	36696	7368
1734	524.28821	11.99	523.281	1128	1064	1094	1066	0	1354	0	0	1704	0	846	0	0	1006	0	1016	0	1030	0	1024	0	978	0	0	0	0	768	0	0	0	0	0	0	0	0	0	1186	1534	1382	1248	0	1144	1460	1196	1138	0
1735	582.23336	12.04	581.226	0	0	0	0	0	0	0	0	0	0	0	0	0	0	0	0	0	0	0	0	0	0	0	0	0	0	0	0	0	0	0	0	0	0	0	0	0	0	0	0	0	0	0	0	0	0
1736	188.13964	12	187.132	0	1282	0	0	268	1806	0	0	1188	310	0	198	0	0	962	0	0	130	0	328	0	236	0	234	0	0	260	0	184	0	0	144	0	96	146	322	0	0	260	0	1336	0	204	0	340	0
1737	336.22912	12.04	335.222	0	0	5398	3412	2834	4520	3144	0	0	0	0	0	0	12162	0	0	0	0	0	2478	0	1392	0	2272	0	0	0	0	0	4872	4154	0	6246	6140	5234	5580	0	0	0	0	0	0	0	0	0	0
1738	348.20316	12.01	347.196	5092	0	0	0	0	0	0	0	0	0	8354	0	9638	10752	11052	15138	9414	0	14738	0	0	0	9344	0	0	0	0	0	7260	15732	0	19162	0	14914	10874	13868	21614	0	0	0	0	0	0	29754	0	0
1739	316.20364	12.03	315.196	912	0	866	0	0	656	544	0	540	2052	1766	1950	1338	1786	1986	2110	2044	2010	0	0	0	0	0	0	0	0	0	1218	1314	1182	1460	1214	1054	1192	1274	0	7992	8408	8534	10324	10278	9696	10772	10916	11004	540
1740	326.20672	12.02	325.199	3004	0	2522	0	0	0	0	0	0	0	0	0	3552	0	3596	0	3444	0	0	0	0	8526	9524	0	0	8736	0	2968	0	2744	0	0	2454	1960	2016	0	11070	11620	10720	12268	11956	12714	13754	14022	15686	0
1741	314.24519	12.04	313.238	3532	2980	3304	3420	2894	2860	2890	2702	2754	6012	5886	6208	5468	5236	4262	6112	6306	6116	26086	24994	23376	20564	21364	21890	20160	20210	20630	4918	4662	3338	4048	4638	4022	3528	3342	2878	13690	13576	13368	14280	13508	13844	14706	15638	15212	11016
1742	348.20612	12.07	347.198	12642	12602	14228	13782	12818	13646	11722	11940	13180	19964	20052	12210	20994	24486	23598	23698	24356	22498	121062	118398	103600	79628	80228	86078	85390	90056	85050	25418	25704	26094	34068	35824	34596	31990	31592	34422	75202	72516	73616	71086	68094	71274	72754	74216	76372	21616
1743	270.21862	12.09	269.211	17428	15830	14240	16704	12344	14020	11310	12038	10590	32026	33478	35888	25480	25134	24466	21712	22502	21380	27374	28478	32364	26728	29164	28874	27870	27906	26688	5158	5828	5114	6244	5526	5018	4360	4930	5282	52234	49788	53498	49054	49398	50406	50908	53608	56494	6838
1744	290.18760	12.08	289.18	388	0	298	346	526	238	0	0	0	1736	0	1602	1780	0	2182	0	0	1820	2014	1826	0	2110	0	2522	1962	2398	1996	0	0	0	0	990	0	366	0	342	3356	3054	2654	3032	0	4220	0	2674	0	254
1745	188.10378	12.07	187.096	658	646	418	0	478	464	0	346	436	494	408	388	568	216	618	348	538	346	572	790	554	0	506	372	550	428	404	314	286	444	260	206	372	220	228	306	682	590	0	666	586	872	670	0	1060	544
1746	386.17953	12.05	385.172	4002	3198	4156	4224	4004	3774	3634	3948	4508	5758	5750	6716	6526	6816	6948	6978	5794	6966	17920	15966	13332	9686	8774	9348	8844	7990	7336	4948	7856	7338	9660	10154	10634	8980	9910	10888	17086	17662	17352	14934	15750	15024	17670	16778	18136	0
1747	338.24462	12.06	337.237	1724	2274	1764	3114	2638	2014	1596	2200	2284	5614	6054	7696	5232	5162	7246	6524	8638	8890	5676	6036	5788	5516	5740	5286	4916	5068	5456	2274	1498	1826	1898	2152	2214	2736	2306	1690	4664	4630	4136	4634	4908	5174	5558	5184	5338	0
1748	366.21375	12.07	365.206	1278	1156	1148	954	1706	994	1458	1758	918	2112	0	2138	2296	2584	2248	2572	2502	2692	11952	10920	0	7548	8566	7312	0	6988	7640	0	1522	1534	1642	0	848	0	0	0	5128	2972	4794	3218	5530	3018	4082	0	6888	1248
1749	311.81330	12.09	310.806	0	0	0	0	0	0	0	0	0	0	0	0	0	0	0	0	0	0	0	0	0	0	0	0	0	0	0	0	0	0	0	0	0	0	0	0	0	0	0	0	0	52	0	0	0	0
1750	130.02435	12.14	129.017	0	6100	4840	5594	5292	5276	5026	5842	5282	2034	2066	2120	2090	1940	2120	2126	2400	1978	1058	1050	974	0	0	756	622	0	0	602	784	1058	0	888	0	0	488	596	408	202	314	386	370	310	396	260	336	182
1751	174.01479	12.1	173.008	8116	8118	0	7040	7428	7526	7860	0	6354	3350	3122	2818	2646	2692	2342	2232	2072	1578	0	0	0	0	0	0	0	0	0	418	0	0	718	0	556	472	0	0	444	308	332	202	106	222	0	130	210	0
1752	217.98708	12.11	216.98	0	0	0	0	0	0	0	0	0	0	0	0	8614	7888	7604	0	9078	8236	0	0	0	0	0	0	0	0	0	27038	0	0	28478	0	0	31478	0	0	6996	6040	5832	5874	5616	5370	5364	5054	5754	2378
1753	304.18025	12.1	303.173	1758	1712	2092	1700	2152	2224	1732	1832	1920	2290	2412	2352	1924	2166	2064	1432	1584	1628	704	1084	0	0	0	0	0	830	0	0	0	0	1124	938	658	954	914	1022	4822	4742	4670	3174	3266	3558	3678	3398	4286	1706
1754	848.45636	12.11	847.449	522	0	0	0	0	0	0	0	0	0	0	0	484	0	0	0	0	0	934	0	0	0	0	0	0	0	0	622	0	0	0	0	0	0	0	0	0	0	0	0	0	1056	1132	0	0	5366
1755	260.19804	12.11	259.191	5430	5428	4624	5130	5150	5280	5044	4632	420	1166	2206	1082	2654	2446	2380	2516	2228	2532	75976	77786	62454	49572	47938	52900	47494	47204	50234	284	0	418	0	0	668	510	586	0	664	556	568	600	672	832	786	790	864	5692
1756	294.21859	12.12	293.211	9602	8714	7938	10230	9812	9596	7990	7086	6696	50564	44932	49478	65880	69308	72408	72046	73428	74488	101280	103750	99896	91448	93874	96918	99842	92266	99108	26928	26190	22536	28890	27196	28330	24476	24598	24122	49952	46390	48120	67934	67510	66000	70736	68036	65378	25716
1757	330.19501	12.17	329.188	2088	2218	4206	5488	4864	2824	4074	4302	2780	11108	11214	11632	15282	13936	15164	13764	13132	13888	8860	7758	6786	4952	4642	4416	3718	4124	3612	3416	6132	4264	7054	7216	8452	4660	5454	8154	12666	12098	12158	13040	14266	11202	13704	13286	12552	6194
1758	198.12403	12.16	197.117	632	250	406	330	182	0	196	0	164	206	0	316	238	282	214	180	308	232	202	222	338	322	326	256	362	196	122	0	220	196	252	322	246	0	0	206	504	330	728	502	398	620	0	446	436	316
1759	135.89975	12.14	134.892	0	0	0	0	0	23146	0	0	0	22634	21334	0	20422	20728	0	0	14510	11294	11028	10472	11536	12706	12580	0	0	9908	8918	1624	2706	5016	3462	5204	5792	3630	4308	4882	14004	0	0	0	0	0	0	0	7628	366
1760	131.94916	12.17	130.942	4624	4984	3884	3812	3198	3136	3562	3084	2932	4762	4760	4838	4444	5394	4256	4220	4212	5814	6866	7116	6510	6720	6080	6550	8202	8002	7726	14156	11998	10958	10034	9240	8266	9024	8202	8206	6146	5788	6038	6622	5452	5938	6552	5130	5632	4396
1761	196.81747	12.15	195.81	5722	7538	8910	0	7482	7434	6774	0	7950	9958	9636	0	10208	10528	0	0	7192	6188	5970	5150	3300	1882	1802	1846	1642	0	990	78	0	1058	514	926	1302	0	1036	0	5508	5190	5552	4732	0	4520	3468	3674	3888	0
1762	316.26056	12.15	315.253	3542	3490	3162	3322	3208	3384	2676	3496	2578	6346	5962	6072	4588	4800	4358	6336	5730	5400	16904	15460	14620	12990	13154	14152	13264	13134	13074	2998	2940	2264	2778	2936	2772	2998	2660	2870	12988	12026	11898	12748	14330	12898	14154	13026	12302	2750
1763	127.90986	12.16	126.903	2082	1912	1748	1774	1750	1680	1278	1392	1528	1370	1330	1162	1212	1190	1106	1224	1054	1374	1670	1646	1964	2182	1772	2112	1992	2044	2058	1970	0	1774	1788	2028	1478	1508	2076	1856	0	996	1134	0	1106	0	1122	0	1210	0
1764	340.15709	12.16	339.15	468	0	0	406	368	670	0	0	578	0	0	0	0	0	0	0	0	0	0	0	0	0	0	0	0	0	0	0	0	0	0	0	0	0	650	0	1068	0	918	0	0	0	1054	0	0	606
1765	146.09259	12.19	145.085	0	844	420	428	500	598	0	578	0	1346	1480	0	0	1138	1406	0	1268	0	0	722	564	0	408	392	188	406	158	338	0	230	196	242	250	202	0	0	244	192	208	0	0	276	444	270	390	94
1766	228.09917	12.17	227.092	0	0	0	0	0	0	0	0	0	0	0	0	0	0	0	0	0	0	806	238	424	168	0	316	316	276	190	0	0	0	0	0	0	0	0	0	554	698	386	524	556	0	760	0	588	368
1767	186.08778	12.17	185.081	424	0	252	480	356	170	0	244	440	326	396	330	286	300	246	202	236	0	0	466	0	1908	0	2584	0	420	228	0	196	0	146	220	0	164	260	0	0	264	412	106	264	202	124	302	178	308
1768	500.22727	12.2	499.22	0	0	0	0	0	0	0	0	0	448	0	934	0	0	0	0	0	0	0	0	0	0	0	0	0	0	0	0	0	0	0	0	0	0	0	0	0	0	0	0	0	0	0	0	0	0
1769	436.26517	12.18	435.258	0	0	0	0	0	0	0	0	0	0	0	0	0	0	0	0	0	0	0	0	0	1314	0	0	0	0	830	0	0	0	0	0	0	0	0	0	0	0	0	0	0	952	0	0	0	0
1770	372.20613	12.18	371.199	4924	5060	4700	6142	6306	5112	5220	5204	5350	19268	20652	18922	17458	17424	16406	19534	23014	22452	1400	1674	1302	1394	1184	0	0	1132	0	6462	7078	6966	9084	8624	8720	8420	8196	8476	19314	20284	19872	22336	20812	21794	25402	24786	23732	0
1771	318.21887	12.21	317.212	2932	2454	2398	2670	2826	2884	2464	2474	2212	49444	49908	51368	27268	26736	26904	24656	25464	27504	2234	2440	1990	1834	1750	2476	1636	1710	1926	8916	9158	7966	8704	9278	9820	9436	8872	8144	23568	21870	21824	33328	34110	35940	30594	32148	32036	0
1772	416.27644	12.21	415.269	0	0	0	0	0	0	0	0	0	488	0	0	0	800	582	0	0	0	0	0	0	0	0	0	0	0	0	894	908	828	502	464	596	0	0	0	0	0	0	0	0	0	0	0	0	0
1773	354.19643	12.22	353.189	1418	1782	1848	1606	0	1798	1706	1920	1786	13312	11006	11790	7636	7436	7858	7416	7060	7190	0	0	0	0	0	0	0	0	0	2724	2792	2880	3608	3704	3898	3670	3722	3922	6418	5822	5742	7056	7092	7188	6912	6644	7436	2262
1774	158.09254	12.24	157.085	890	0	0	666	754	318	412	422	470	458	420	410	410	358	206	394	538	282	962	0	0	1116	1402	1330	1192	0	1234	0	0	726	0	744	492	702	578	528	400	618	494	498	408	0	558	720	358	446
1775	138.02960	12.24	137.022	1740	2164	2294	2482	2388	2822	2396	3036	2746	1332	0	0	0	0	0	710	0	1042	0	1732	3572	5238	5156	6676	7368	7470	7636	1702	1658	1696	1844	1888	2222	2308	2060	1776	606	0	0	0	636	0	0	0	0	0
1776	710.33410	12.21	709.327	3790	730	0	0	4782	778	4276	0	0	0	0	13114	0	0	0	0	0	0	0	0	0	0	0	0	0	0	0	0	0	412	0	0	0	1072	634	0	0	0	0	0	1290	0	0	3162	0	0
1777	310.21378	12.21	309.207	2600	1780	2042	1842	2100	1914	2072	1676	2046	1162	0	3078	0	2132	0	3180	2754	0	8700	8904	9044	7708	9046	7936	8044	8652	7380	2184	1916	0	2368	2574	1792	0	2490	0	5728	7216	5796	3580	0	0	0	0	0	2250
1778	278.17271	12.25	313.142	19630	20072	23642	18416	20746	20216	3934	3656	4252	96070	88140	82194	75822	66232	59954	97496	95076	90530	33980	31034	31934	35336	33530	33844	27920	29248	26960	92786	111738	116298	120300	129724	134704	103966	98088	107970	44938	38052	37630	4732	5496	3916	29110	26692	25730	75332
1779	306.19607	12.26	305.189	7328	7714	6992	7372	7276	7088	6186	6184	7686	5898	6670	5260	6518	5992	5500	4246	5232	5028	3816	2926	2628	0	2908	3002	0	0	0	2596	0	0	2290	2586	2710	2502	3438	3136	17850	18944	17798	14296	14362	14152	16144	15024	15076	1896
1780	326.18219	12.24	325.175	0	0	0	0	0	0	0	0	0	0	0	0	0	0	0	0	0	0	0	0	0	0	0	0	0	0	0	9240	8826	7616	6958	6400	6160	5506	0	4964	0	0	0	0	0	0	0	0	0	4508
1781	194.07011	12.26	193.063	1320	1084	1572	994	1282	1022	906	806	0	1098	1092	944	916	924	846	804	792	650	0	0	0	0	0	0	0	0	0	1470	856	622	1178	1092	736	1146	1182	1046	612	0	606	862	0	664	1008	864	0	2230
1782	242.18715	12.23	241.18	1322	1460	1342	986	936	1122	1214	996	1014	1140	1218	1194	1140	1064	984	1222	932	862	0	4226	3740	908	3680	3522	428	3792	3744	734	524	474	458	382	392	416	506	418	1200	0	1370	1326	1474	1092	1190	0	1244	518
1783	436.26542	12.24	435.258	0	0	0	0	0	0	0	0	0	0	0	0	0	0	0	0	0	0	864	0	0	0	934	830	0	0	906	0	710	0	484	0	0	0	0	0	786	0	0	0	0	0	0	0	0	0
1784	328.22419	12.22	327.217	1910	2204	1444	0	2106	1028	1280	1158	0	1144	1740	1664	1910	2200	2594	2046	0	2128	0	9050	0	0	0	0	0	0	0	2956	2250	1834	1880	0	1788	2102	0	0	14454	14442	15610	18536	19036	18946	18554	19318	18636	0
1785	184.10853	12.24	183.101	0	0	0	0	0	0	0	0	0	0	420	412	0	0	0	0	0	0	184	110	104	254	324	180	306	154	240	0	0	0	0	0	0	0	0	0	534	540	564	716	306	0	414	748	704	262
1786	272.23399	12.23	271.227	4258	3440	3590	4286	3448	3502	3100	3098	3108	4136	4258	4908	4896	3878	4708	4520	4036	3586	16544	18816	16908	16000	15296	14358	15024	14734	15280	4612	4246	3856	5276	5222	4716	4662	4084	4520	9922	11876	11472	11064	11058	13840	12348	11354	12144	5516
1787	294.21854	12.26	293.211	14200	13390	12666	12206	13138	12648	11476	11234	10660	28074	0	0	0	0	0	0	0	0	63574	67686	62236	0	0	58008	57250	54358	0	23814	22714	21860	26958	25368	24850	24772	26466	23850	67068	62454	68240	71524	72954	74774	81530	76220	79400	24764
1788	284.23397	12.22	283.227	3304	3344	2588	2438	2502	2352	2124	2194	2240	1630	1650	1654	738	916	1000	866	888	708	15546	16996	13208	14466	12490	12580	13020	12996	14006	538	878	936	420	574	718	754	0	0	2784	2948	2406	3308	3670	3820	3244	3450	3430	1254
1789	286.21324	12.27	285.206	2204	1736	2134	2254	2224	2108	2986	2246	1964	1426	1398	2024	1872	1614	1940	2136	1880	1962	276180	256564	235524	188138	186160	194392	179902	184186	192846	3360	2422	1306	1734	0	1304	1268	1120	1036	2408	2654	3288	2374	2590	2582	3144	2936	3018	7116
1790	334.22245	12.31	333.215	0	4564	0	0	6450	0	0	5062	0	9042	5892	0	6434	0	0	0	0	0	0	0	0	0	0	0	8904	9058	8804	0	4486	0	5416	6138	5574	0	0	5012	0	0	0	0	12274	0	0	0	0	0
1791	830.44494	12.28	829.438	0	0	0	0	0	0	0	0	0	0	0	0	0	0	0	744	0	0	0	0	0	0	0	0	0	0	1070	526	0	0	0	0	0	606	0	0	922	0	0	0	0	0	1160	0	870	2268
1792	296.23441	12.3	295.227	23558	19380	18102	21798	21804	19192	17412	16610	17702	49766	48204	51058	64440	65662	64188	69906	71684	69652	93378	96854	88142	84238	82794	86654	88100	85626	94112	32512	27810	30550	33678	33782	36304	30970	29618	32166	98600	95440	102694	102390	112752	110594	116342	122048	123332	32270
1793	332.21015	12.31	331.203	5842	6404	5056	6608	6470	6992	6042	6334	6506	12074	11452	10868	15492	17188	14716	14158	14492	15104	8772	7850	7236	6100	4686	6096	5354	4808	4196	6372	7960	6678	8418	7044	8338	8792	9268	9080	22632	20986	19184	18116	17934	15964	19342	19392	19056	8546
1794	232.09345	12.29	231.086	356	0	506	0	0	0	606	0	0	556	0	0	442	0	0	0	0	0	0	0	0	0	0	0	0	0	0	0	0	0	0	0	272	0	0	0	0	276	0	350	0	304	0	0	274	0
1795	314.24466	12.29	313.237	2540	2966	3104	2940	2464	2526	2580	2668	2594	3258	2484	2634	2730	2266	2828	3256	3134	3730	73922	66876	62500	46682	45712	52040	49022	50392	47878	5090	3476	4038	3316	3498	3238	3110	3294	2610	8238	8536	9020	8234	9054	8656	9788	10076	9290	2470
1796	600.45713	12.33	599.45	0	0	0	0	0	0	0	0	0	0	0	0	0	0	0	0	0	0	12412	12374	10386	7116	8702	8082	7130	8144	7718	0	0	0	0	0	0	0	0	0	0	0	0	0	0	0	0	0	0	0
1797	556.29058	12.36	555.283	716	1172	1206	2968	4840	0	0	0	0	0	0	0	0	0	0	0	0	0	0	0	0	0	0	0	0	0	0	0	0	0	0	0	0	0	0	0	0	0	0	0	0	0	0	0	0	0
1798	111.98053	12.34	110.973	0	0	950	0	896	0	0	0	0	1004	0	0	862	0	0	0	690	830	2678	5164	15604	15626	17184	0	0	15992	15806	0	0	0	0	0	0	934	0	1028	1274	1128	1238	0	0	0	0	0	1540	188
1799	312.22812	12.36	311.221	2974	3080	2714	2590	2204	2712	2922	2538	2316	3094	3050	3264	3284	3802	3738	4192	4634	3704	30342	32478	25970	21902	24338	23232	23998	23426	24432	2642	2250	2076	2546	1948	2046	2062	1998	2282	9352	6596	10788	0	0	0	0	0	0	2426
1800	274.21358	12.36	273.206	1086	790	882	1032	1028	492	956	712	784	0	0	366	0	0	262	360	0	320	51472	49452	45028	34986	35396	37228	37880	37924	36290	0	0	456	408	236	194	0	210	0	0	426	494	0	222	0	0	0	0	0
1801	712.33945	12.37	711.332	2102	840	2652	0	0	0	2624	4214	4426	13934	13188	12998	13850	12544	12906	11528	9664	10144	0	0	0	0	0	0	0	0	0	3870	4278	0	0	0	1012	5072	5758	0	0	2034	2172	2708	0	1604	0	2136	1960	0
1802	334.22538	12.37	333.218	5670	5360	6198	6498	8600	8586	5862	5734	6272	10626	8440	8072	8664	8088	7874	9904	10110	9802	19034	14532	14216	12174	11690	9320	10834	10542	10018	6220	6272	4818	8424	8312	7814	5710	5196	6268	23336	20820	20420	14812	18706	18260	19830	18374	19574	34186
1803	712.34050	12.39	711.333	0	0	0	0	0	0	0	0	2900	0	0	0	0	0	0	11368	9894	0	0	0	0	0	0	0	0	0	0	3044	0	0	0	0	0	0	0	0	0	0	0	0	0	0	0	0	2092	0
1804	344.23451	12.36	343.227	0	0	0	0	0	0	0	0	0	50752	51540	48200	14322	14110	14136	9708	9488	10292	0	0	0	0	0	0	1218	0	0	0	0	0	0	0	698	0	0	0	1168	0	0	0	1498	0	0	0	0	0
1805	320.23419	12.37	319.227	16060	14782	14380	16580	14948	15438	13976	14544	12490	91624	90218	99492	85382	80172	84580	111600	117874	115266	6098	6016	4886	5200	4102	4804	4278	4080	3982	17594	16722	16078	19076	19852	20962	16720	16318	16526	18320	16130	16968	22808	23094	23822	26160	23736	23298	1744
1806	380.21060	12.39	379.203	0	0	0	742	0	0	0	0	586	13310	13244	12550	4296	4622	3786	2928	3302	2746	1394	0	0	0	0	0	1028	0	0	852	0	0	0	0	0	0	0	0	0	0	0	0	0	0	1460	0	0	0
1807	212.13995	12.41	211.133	860	0	658	1138	570	640	436	408	394	324	270	0	114	322	362	160	204	260	270	422	348	356	218	300	388	0	400	284	0	222	0	0	232	148	156	0	184	236	376	540	356	0	256	0	0	1424
1808	296.23432	12.4	295.227	0	0	0	17192	0	0	0	0	0	0	0	0	0	0	0	0	0	0	0	0	0	0	0	0	0	0	0	0	0	0	0	0	0	0	0	0	0	75672	0	78522	0	0	0	0	0	30308
1809	186.08766	12.38	185.08	350	478	340	234	252	416	346	352	234	224	328	270	270	488	314	202	264	360	0	724	0	1986	2758	2434	1252	628	482	166	132	120	236	272	242	178	202	176	240	334	178	162	98	242	438	238	270	0
1810	368.18829	12.38	367.181	1580	1382	1758	2016	1912	2418	1962	2362	1706	3308	2610	2664	2386	2606	2896	2630	2960	3164	0	0	0	0	0	0	0	0	0	2086	2454	2126	3344	4066	3604	3970	4214	3608	5412	4272	4198	3150	3850	3680	0	5414	4726	2300
1811	298.24995	12.38	297.243	22812	19904	18170	19394	18766	17602	15806	18198	15348	36340	38656	33958	30822	30966	31474	37034	40070	38430	231946	225164	206594	187694	192026	207656	208672	215034	212644	20986	19088	18014	22846	24812	21508	20270	17734	20256	114368	113758	111248	108198	109834	111260	124130	118868	126520	216846
1812	260.19819	12.41	259.191	0	0	0	0	0	0	0	0	4970	0	0	0	0	0	0	0	0	0	16174	15770	14314	0	9752	12280	12078	12112	11478	0	0	0	0	0	0	0	0	0	0	0	0	0	0	0	0	0	516	0
1813	500.27456	12.44	499.267	7946	9188	10924	13716	11640	11280	10716	11776	9664	8058	8288	7772	8048	8804	7742	9168	8644	7728	1274	0	0	0	0	0	0	1220	0	3708	4348	4956	5874	5728	5466	6670	5496	5946	0	1454	1784	0	1872	0	0	1604	1662	2240
1814	330.23949	12.43	329.232	1262	956	1210	1240	1218	1478	1586	974	1318	0	0	1518	1498	0	1544	0	1284	0	0	0	0	4456	0	0	3034	0	0	2578	2142	0	1738	1898	2474	2210	1840	2170	10848	11314	10472	11598	12438	12166	11804	11634	11938	1538
1815	346.25147	12.43	345.243	0	0	0	0	0	0	0	0	0	6606	7176	5996	2204	2194	0	1254	730	1848	3936	5024	4422	3612	3616	3972	3632	4104	3636	0	0	0	0	0	0	958	860	0	0	0	0	0	0	0	0	0	0	0
1816	248.17577	12.44	247.168	312	0	192	0	164	0	0	286	0	3090	2916	3528	1294	1204	1134	1076	1094	1162	9194	9762	9234	8858	8442	9234	12084	10868	10892	726	404	512	440	406	564	464	476	420	552	180	198	484	350	484	464	528	432	134
1817	310.21348	12.43	309.206	0	2350	0	2078	1682	2032	0	2094	0	0	1328	1848	0	0	0	2238	2096	1140	4708	4202	0	3872	3600	4504	3484	4386	2354	0	1914	1692	1862	1566	0	0	1518	0	2852	0	2940	0	2754	0	3262	3492	3306	0
1818	578.27594	12.47	577.269	1942	1646	1604	1318	0	1460	0	1508	1140	1558	1008	0	1446	1448	1630	1530	1292	1346	1046	1010	1802	4944	4476	2936	1628	1274	1842	0	1126	0	0	1020	0	1016	0	0	2346	2802	2882	3640	3518	3160	2956	2428	0	0
1819	500.23127	12.47	499.224	0	0	0	0	0	0	0	0	0	0	0	0	0	0	0	0	0	0	0	0	0	0	0	0	0	0	0	0	0	0	0	0	0	0	0	0	0	0	0	0	0	0	0	0	0	0
1820	135.89994	12.44	134.893	0	0	0	0	0	0	0	0	0	0	0	0	0	0	0	16832	15388	12002	12112	10204	12430	13112	12452	11078	0	10380	9258	1996	2230	3966	2696	3738	4320	3304	4006	3814	0	0	0	0	0	0	13070	9454	0	246
1821	400.16101	12.45	399.154	524	0	0	0	0	0	0	0	0	0	0	0	0	0	0	0	0	0	0	0	0	0	0	0	0	0	562	874	638	884	0	774	0	0	0	0	0	0	0	0	0	0	0	0	0	738
1822	286.21360	12.49	285.206	2638	2856	2590	2656	2798	3000	3902	2500	2706	2526	2002	2486	1896	2288	1772	1894	1732	1728	69732	0	73952	57662	59498	62268	61696	60956	63254	2934	2300	1868	1704	1488	1550	0	1262	0	2714	0	2324	0	0	2494	1920	0	0	1486
1823	528.26045	12.48	527.253	18394	15166	0	14238	16310	0	18902	14326	12584	12600	6990	5620	5824	6276	7210	6092	4680	5018	0	2922	4752	11886	11884	7226	2628	2048	0	1368	0	0	1164	932	0	1196	1124	1396	2674	3014	4280	4600	3928	3932	3310	2848	1548	0
1824	196.81690	12.45	195.81	10066	8094	8166	8568	12136	9378	12250	9058	11700	13720	13336	12448	13248	12486	10976	11354	8536	6422	0	4446	2970	0	1536	1636	1378	1296	0	0	436	0	130	0	1042	542	0	836	7210	5640	6178	4860	5584	4688	4256	3816	3758	0
1825	478.26909	12.47	477.262	0	0	0	0	0	0	0	0	0	7818	7680	8438	8594	0	9236	7810	8238	8002	0	256	0	0	0	0	0	0	0	6782	7470	7582	9858	11032	9494	9280	8774	9924	0	0	0	0	0	0	0	0	0	0
1826	368.15536	12.48	367.148	0	0	0	0	0	0	0	0	0	0	0	0	0	0	0	0	0	0	0	1472	1450	1614	1570	1732	1764	1766	2028	0	0	0	0	0	0	0	0	0	0	0	0	0	0	0	0	0	0	0
1827	272.23448	12.45	271.227	3744	3560	3390	3134	3142	3112	2890	2866	2732	2726	2892	2904	2326	2282	2388	2932	3072	2866	11658	11216	10526	10030	10354	10216	9136	12046	9344	4248	3468	3138	4558	4818	4470	4232	3794	4320	7080	6534	6364	7100	6600	6302	6148	6586	6614	8498
1828	832.45896	12.48	831.452	0	0	0	0	0	0	0	0	0	0	0	0	0	0	0	0	0	0	0	0	0	0	0	0	0	0	0	0	0	0	0	0	0	0	0	0	0	0	0	0	0	0	0	0	0	1576
1829	300.22946	12.47	299.222	1460	1328	1422	1286	1452	1584	1488	0	1140	0	0	0	0	1028	0	0	0	0	74714	73254	68090	51854	58094	56234	54698	60202	55636	1156	816	780	0	0	850	612	430	0	2888	2860	2550	2522	2572	2770	3712	0	1296	0
1830	334.22689	12.55	333.219	8340	8142	8598	9038	2088	0	8300	7692	7844	0	12410	11602	8960	8112	9032	11064	11016	13282	15524	14048	12888	9978	10028	9124	0	0	0	0	0	5668	0	0	0	8238	7646	7220	29378	30324	29670	23004	26076	27068	31616	28724	31658	14906
1831	158.09271	12.52	157.085	0	0	836	0	512	382	374	198	312	0	0	412	244	340	392	284	0	384	0	0	0	0	0	0	0	1478	1214	0	0	0	0	392	0	0	356	408	440	0	346	168	322	274	436	0	420	334
1832	814.45381	12.53	813.447	0	0	0	0	0	0	0	0	0	0	328	0	0	0	0	0	0	0	0	0	0	0	0	0	0	0	0	0	0	0	0	0	0	0	0	0	0	0	0	0	0	0	0	0	0	3030
1833	814.47334	12.52	813.466	0	0	0	0	0	0	0	0	0	0	0	0	0	0	0	0	0	456	0	0	0	0	0	0	0	566	0	0	0	0	0	0	0	0	0	0	0	0	0	0	0	750	0	0	0	0
1834	556.28998	12.53	555.283	0	1014	0	3392	6258	12672	16178	21880	24920	37548	31238	35242	34048	35260	35452	26610	21286	19382	32862	41216	49532	86384	72618	56712	81482	78746	75760	33558	0	0	22404	21456	20676	19136	19056	0	38568	0	0	0	0	0	0	0	0	14986
1835	582.30490	12.52	581.298	0	0	0	876	726	0	2998	6240	14600	37734	35338	32850	25664	26546	30294	28702	26844	23644	14938	13976	15352	28794	29156	24732	22422	24596	19666	13244	9608	7380	5608	5330	5960	5174	5278	6202	9388	0	12474	0	0	12988	12346	0	17188	4808
1836	194.07001	12.52	193.063	476	708	0	0	0	788	0	0	0	834	936	958	910	1000	0	750	0	710	0	0	0	0	0	0	0	0	0	0	0	0	0	0	0	0	0	0	0	0	0	0	0	0	0	0	0	0
1837	104.00848	12.54	103.001	0	620	606	0	0	0	0	0	0	860	0	444	390	600	526	416	572	610	588	678	464	422	420	560	502	358	438	348	0	444	490	584	738	726	602	402	438	344	170	0	274	0	470	328	172	0
1838	324.20533	12.54	323.198	0	1754	1470	1688	1658	2394	1948	1596	1860	0	0	0	0	0	0	0	0	0	18444	16132	17690	13540	11992	12136	12524	11924	10600	0	0	0	0	0	0	0	0	0	0	0	0	0	0	0	0	0	0	0
1839	250.19234	12.55	249.185	376	0	360	0	368	312	240	290	234	2446	3086	2156	1144	866	1102	922	1042	946	710	1026	1136	688	748	794	1000	1054	1006	0	626	686	964	518	728	596	490	592	790	734	734	1010	1278	1002	1402	1202	1240	3566
1840	832.46146	12.56	831.454	0	0	410	0	0	0	0	0	0	0	0	0	0	0	0	0	0	0	530	0	704	0	0	0	0	0	0	0	0	0	0	0	542	0	0	0	0	0	928	0	0	0	0	0	0	7016
1841	288.22916	12.56	287.222	17990	18448	17954	19360	23640	23258	20456	20348	19614	7514	7368	7940	6308	6344	5088	5328	5024	5590	501946	519458	492922	389680	363030	384888	431230	420288	407768	8386	5484	4824	4728	3842	3692	3548	3244	1626	2840	3488	2720	3654	3332	3132	3588	3152	3986	11488
1842	832.48418	12.58	831.477	656	0	0	0	0	0	724	0	0	0	0	0	0	0	0	0	0	0	732	0	0	0	0	0	0	0	800	0	0	0	0	0	0	0	0	676	1314	1518	1640	1592	1688	1490	0	1486	0	0
1843	832.46452	12.59	831.457	0	0	0	0	0	0	0	0	0	0	358	0	0	0	0	0	0	0	0	0	1084	0	0	0	0	0	0	0	0	0	0	0	0	0	0	0	0	0	0	0	0	0	0	0	0	0
1844	260.19827	12.58	259.191	0	3126	3022	3644	3810	3858	3744	3452	3730	0	604	0	214	0	0	0	0	0	0	0	0	11178	2232	0	0	0	0	1310	1424	1166	0	1136	1056	1070	1186	0	402	388	0	824	406	0	0	0	0	0
1845	198.12462	12.56	197.117	468	330	394	264	392	410	236	424	290	322	450	266	206	220	252	202	262	208	262	244	252	214	228	164	274	0	0	148	312	0	294	418	0	172	0	0	238	406	390	152	228	346	444	310	284	186
1846	298.25027	12.58	297.243	9574	0	0	7414	2624	7178	7416	6486	0	0	0	0	0	6726	0	0	0	0	0	0	0	0	0	0	0	0	0	0	0	2948	2978	0	3042	5910	0	3084	0	0	0	0	0	0	0	0	0	0
1847	232.09399	12.57	231.087	538	0	478	450	0	378	0	0	0	0	0	0	0	692	0	0	0	0	0	188	0	0	0	0	0	0	0	0	0	0	0	0	0	0	0	0	0	0	0	0	0	282	490	0	0	0
1848	156.00720	12.59	155	4318	3526	3260	2900	2774	2872	2812	3028	2456	2176	1994	1752	1828	1540	1778	1400	0	0	6074	8562	11246	14180	15946	15730	16380	18148	19426	6166	5720	5390	5064	4028	3220	2506	2296	2034	0	0	1242	0	0	0	0	0	864	234
1849	270.21882	12.59	269.212	6500	5558	6068	5566	5388	4840	5060	5436	5220	4332	4896	4958	3992	4534	4368	3724	3678	4096	17260	16304	15932	15906	15670	15818	14876	16348	15948	5282	3922	4092	4660	4302	4644	4858	3850	3802	11714	13012	13764	12722	13070	13838	13582	15420	15112	4806
1850	192.02564	12.61	191.018	0	0	0	0	10022	8088	6974	0	5480	0	0	0	8150	8552	0	6724	6640	6386	7408	4458	4344	3436	2684	2448	2420	1866	1692	0	0	0	918	0	1080	782	0	0	0	1130	1180	1068	0	0	868	0	1030	0
1851	314.24418	12.63	313.237	4938	2890	4400	5660	4932	4256	4870	4274	5582	2990	2912	2960	2660	2218	2394	2458	2242	2866	471432	502962	482748	409048	407254	413736	423194	412556	418118	11538	6950	3972	2946	3304	2510	2206	2844	2456	3868	4846	3624	3966	4148	5820	3912	4316	4222	2014
1852	214.11915	12.61	213.112	552	396	518	410	520	376	0	512	0	238	426	218	0	380	506	212	330	440	274	178	344	280	342	326	166	222	134	214	304	252	300	360	278	332	174	224	246	644	456	552	484	422	750	404	456	316
1853	350.22170	12.64	349.214	1346	844	1270	1434	1482	1264	1454	1262	1054	948	0	0	0	0	1146	1008	1566	1694	22690	22392	22414	16902	15426	16062	15038	14092	14594	0	448	0	0	0	0	0	0	0	3494	3838	0	0	3392	0	0	0	0	0
1854	628.48730	12.63	627.48	0	0	0	0	0	0	264	0	0	0	0	0	0	0	0	0	0	0	230004	248710	240968	172134	171970	183162	198040	193452	200212	0	0	0	0	0	0	0	0	0	0	0	0	0	0	0	0	0	0	0
1855	310.21436	12.62	309.207	0	0	0	1622	0	0	0	0	0	0	0	0	0	0	0	1258	1654	0	1926	2194	0	0	1728	2332	0	3188	0	0	0	0	0	0	0	0	0	0	0	0	0	0	0	0	2752	0	0	0
1856	131.94895	12.67	130.942	6530	7038	6674	0	5288	4302	5064	5108	5042	0	5972	6874	0	6038	6188	6466	7354	0	9810	10556	10040	9990	10462	0	11458	12760	12218	0	0	0	15420	0	9850	0	12798	12988	6116	6488	6816	6852	6616	6518	7376	0	5600	6950
1857	562.33305	12.62	561.326	9334	9884	7472	8292	0	0	7472	6968	7122	9400	10772	9968	11180	11284	12558	12650	13608	12478	450	0	0	0	0	0	0	0	0	20544	17590	16426	19008	17374	17570	15668	13938	15552	2094	1988	2048	2526	2412	2710	2700	2438	2844	3038
1858	111.98084	12.63	110.974	976	0	0	0	0	0	0	0	0	0	0	998	0	0	0	1056	980	0	2898	7144	22312	22034	22990	23884	21836	19114	18162	0	0	0	0	0	0	0	0	1160	1142	1312	0	1204	1134	1274	1204	1430	1760	256
1859	480.28479	12.63	479.278	2504	962	2418	3106	3372	3496	3498	2710	3544	7642	6706	6992	8938	9590	8708	8190	8170	8382	0	0	0	0	0	0	0	0	0	11586	13428	13222	17494	18742	17300	16272	16104	17008	0	1178	0	0	0	0	0	0	0	0
1860	416.27754	12.64	415.27	0	618	372	0	0	0	0	0	0	726	0	0	0	768	0	656	308	908	0	0	0	364	366	0	0	0	0	0	0	0	0	0	0	0	0	0	726	962	506	670	0	618	0	0	0	0
1861	186.08804	12.64	185.081	0	396	432	254	268	280	254	520	386	458	270	0	268	286	304	186	114	272	0	478	0	2192	2402	3086	0	0	290	270	284	170	180	336	194	290	0	208	134	216	0	346	352	278	554	182	214	1058
1862	482.26574	12.65	481.258	1026	1030	1172	1078	0	0	0	1432	0	1304	0	0	0	900	0	1204	1706	1512	0	1182	852	1404	1884	1824	0	2324	0	0	42062	33416	23890	21366	23164	23412	26884	0	0	0	16702	7284	5208	5118	3992	3802	3778	1224
1863	700.38292	12.62	699.376	0	0	0	0	0	0	0	3088	0	0	0	1026	3242	0	3286	0	0	0	0	0	0	0	0	0	0	0	0	0	988	0	0	0	0	0	0	0	0	0	0	0	0	0	0	0	0	0
1864	394.17218	12.65	393.165	0	0	0	894	0	0	0	0	0	0	0	0	0	0	0	2402	0	632	1486	1380	1846	2062	1906	2234	2494	2474	2536	916	834	896	1128	290	1250	924	1110	0	0	0	0	0	0	0	0	0	0	0
1865	616.32434	12.69	615.317	2276	0	0	0	0	736	1064	0	0	942	694	0	694	0	912	680	0	0	0	4354	0	0	0	3106	2600	0	0	0	0	0	0	0	0	0	0	890	0	0	760	0	0	0	618	0	0	0
1866	752.34307	12.72	751.336	0	0	0	0	0	0	0	0	0	0	0	0	0	0	0	0	0	0	0	0	904	3552	4568	4934	4764	5604	0	0	0	0	0	0	0	0	0	0	0	0	0	0	850	1234	0	0	0	0
1867	294.21844	12.7	293.211	0	0	2636	3610	3594	0	0	2930	0	0	0	0	4564	4510	3700	5288	5626	6480	3104	4264	0	0	0	0	0	0	0	2872	3672	3296	3374	2710	2442	3476	2582	3244	5676	6676	5878	7024	6426	7160	8254	8458	7880	3454
1868	276.20804	12.68	275.201	3082	2208	2408	3090	2750	2716	2390	2394	2200	53042	55266	57656	38508	36444	41700	39818	42256	45768	14774	13830	16156	12194	13274	14490	17630	18834	14884	19802	15322	13504	17312	17266	13118	11576	12072	11438	7304	7380	7022	9200	7754	8474	10568	12544	9720	454
1869	400.16131	12.68	399.154	0	0	326	0	0	0	0	0	0	0	0	0	0	0	0	0	476	0	0	0	2240	1806	2572	0	0	2810	0	660	0	0	832	790	842	0	0	0	0	0	0	0	0	0	0	0	0	0
1870	700.38386	12.71	699.377	0	0	0	842	0	0	2528	0	3466	3318	2956	0	3390	3778	2886	3544	2902	3226	20270	19512	19320	19674	20596	22094	21770	22908	21580	5276	4680	4250	5184	4630	4134	3662	4334	3638	7658	7676	8022	9266	9168	8880	8418	8150	8468	13594
1871	288.22913	12.69	287.222	0	0	0	0	0	0	0	0	0	4300	4490	1728	1128	3494	4052	1528	4690	5522	0	0	0	0	0	0	0	0	57400	0	0	0	0	0	0	0	0	3100	3454	3540	3170	1930	2780	3002	0	2884	3272	0
1872	600.45751	12.67	599.45	0	0	0	0	0	0	0	0	0	0	430	406	0	0	0	0	0	0	13180	13976	12518	8592	9078	8818	9860	9170	9324	0	0	156	0	0	0	0	0	0	0	0	0	0	0	0	0	0	0	0
1873	252.20798	12.72	251.201	922	988	874	1016	1178	994	850	1122	808	3832	4424	3906	1698	1308	1474	1892	1762	2562	1698	1354	1336	1548	1306	1338	1774	1428	1598	1048	954	754	840	1020	920	740	774	820	2322	2326	2592	2810	2486	3488	3852	3048	2906	5462
1874	716.36859	12.74	715.361	0	0	0	3000	2872	0	0	4378	3516	6780	6212	3020	4634	4026	4204	6678	5988	6342	1238	524	1388	982	0	956	882	766	720	1624	0	0	2224	2390	1956	2148	1852	0	2772	2814	2386	2616	2312	2776	2112	0	2214	3432
1875	556.28956	12.74	555.282	0	0	0	0	0	0	0	0	0	0	0	0	0	0	0	0	0	19564	0	0	0	0	0	0	0	0	0	0	26924	28282	0	0	0	0	0	0	0	0	0	0	0	0	0	0	0	0
1876	484.27964	12.75	483.272	952	940	968	0	0	1238	1190	960	1188	0	0	0	1382	0	0	0	0	0	1226	1408	0	1840	1408	1482	1580	0	1592	4820	5424	5022	4422	4154	3798	3910	0	4228	7186	6312	6916	4628	3382	1936	1428	1354	1354	422
1877	244.20281	12.75	243.196	9010	8710	8924	11394	10538	11178	10950	10916	11630	3372	3534	3734	3974	4474	5230	7182	7366	8118	14068	14374	15200	11300	9994	11836	13230	12630	13202	3512	4166	3368	4280	4478	5118	3850	4260	4546	4768	5188	4984	4922	4624	4716	7900	6424	5842	1240
1878	260.19786	12.76	259.191	3214	3968	4868	5290	4704	5632	5400	4180	4034	1872	2012	1758	4634	5306	4066	7216	6010	5684	1916	0	1832	0	1354	2222	2064	0	1848	2864	2568	2760	4002	3316	3584	3202	3526	2956	9916	9318	10670	11118	11268	11528	13472	13124	13606	374
1879	528.25988	12.77	527.253	0	16570	14028	14350	0	19320	0	14374	0	0	0	5638	5468	5658	7170	5512	5354	4246	0	0	0	0	9696	0	0	0	0	0	0	0	0	0	0	0	0	0	2620	2716	4338	4406	4144	3890	3212	2974	0	0
1880	528.30468	12.79	527.297	0	0	0	0	0	0	0	0	0	0	9294	8732	10880	11378	11538	9698	9620	9184	58100	51162	42696	34110	32020	30152	25336	23634	21430	9672	11984	13280	16336	16030	17530	15074	15430	15984	8900	7354	7976	6454	6774	5524	6208	5668	5524	25476
1881	456.28477	12.79	455.277	6228	6364	7314	7210	7258	7378	7364	6396	6578	12236	10834	11368	16982	14974	15820	16298	17238	17806	0	692	0	0	0	0	0	0	0	22782	27144	24782	33656	36184	36004	34328	33240	34918	0	1930	0	1590	1252	1482	1782	0	1508	0
1882	590.29438	12.81	589.287	0	424	0	0	428	508	0	0	0	0	450	400	0	0	0	0	0	0	1242	1168	1716	7716	9876	11030	11040	12670	13888	946	420	0	348	0	0	0	258	0	0	0	516	882	0	0	0	0	822	0
1883	232.09419	12.84	231.087	0	0	0	0	0	0	0	0	0	0	0	0	0	0	0	0	0	0	0	0	0	0	0	0	0	0	0	0	0	0	0	0	0	0	0	0	0	0	0	376	0	160	0	0	0	86
1884	62.99431	12.81	61.987	0	0	0	0	712	0	0	0	906	1000	1206	0	1274	1350	1616	1414	1502	1966	7714	8836	8334	6896	8138	9268	10892	12720	13138	2482	2804	1758	1780	1774	1422	1386	0	1298	1150	914	1298	0	914	1264	1620	1424	1768	2182
1885	582.30485	12.79	581.298	0	0	0	0	646	0	0	6606	0	0	0	0	0	0	0	0	0	0	0	0	0	0	0	0	0	0	0	0	9462	0	5702	5618	5324	4858	5720	5706	0	0	0	0	0	12866	0	0	0	3616
1886	212.14037	12.82	211.133	446	0	188	336	318	366	0	302	0	290	334	0	364	232	156	364	390	0	186	388	388	0	408	362	104	0	190	360	0	0	152	0	0	200	0	0	0	0	0	0	0	0	452	0	0	74
1887	302.22427	12.82	301.217	3582	2930	3314	2758	3844	3332	2700	2958	2904	118866	112730	122016	48510	51310	44170	46806	49922	53558	2004	2208	1758	1834	1726	2028	2042	2152	2050	27960	22220	21520	21722	21634	20062	35402	31380	31184	27188	24676	27864	28974	31192	28464	34818	37508	40090	1656
1888	324.26602	12.83	323.259	0	2496	0	1526	0	2008	1692	728	1846	3690	3098	3560	1846	0	2114	0	0	1604	2274	2148	2048	1820	2398	2208	1184	2278	2630	980	1470	896	576	772	674	0	1132	1396	2224	2016	2122	1842	1844	1860	2102	2432	2364	18238
1889	278.22377	12.85	277.216	6528	5738	6296	5892	6170	5206	5702	5484	5094	31158	31734	35170	28128	35394	30970	40684	45990	38412	23862	23878	23036	18900	21766	23436	26114	27814	26744	19218	18352	13698	17816	17232	17870	14040	12490	12968	17666	20590	19938	19730	20676	20576	25334	21932	25348	17498
1890	554.31967	12.84	553.312	23550	26456	28698	31284	33690	32020	29086	28860	27642	31692	33842	30640	24896	25300	25170	24960	24548	24982	0	2728	2236	0	0	0	0	1462	0	12244	13574	16038	18030	17262	18020	15556	15966	16388	5436	5772	5254	5710	5782	5726	5300	5018	4972	6286
1891	214.12051	12.86	213.113	404	358	554	456	0	542	0	0	0	268	430	334	234	326	332	326	266	442	344	218	266	292	236	462	388	582	334	334	230	420	224	0	0	306	290	210	530	598	468	0	504	706	0	0	716	0
1892	400.16157	12.85	399.154	0	0	0	0	0	0	0	392	0	0	0	0	0	0	0	0	768	0	0	0	0	0	0	532	0	0	0	0	644	806	0	0	716	0	798	620	0	906	0	872	602	870	0	1138	0	188
1893	314.19907	12.86	313.192	0	0	0	0	0	0	0	0	0	0	0	0	3104	0	0	0	4086	3648	0	0	0	0	0	0	0	0	0	0	0	0	0	0	0	0	0	0	0	0	0	0	0	0	0	0	0	0
1894	314.24481	12.84	313.238	2750	4354	2580	3224	3302	3658	3496	3752	3588	0	1438	2642	0	0	1710	2120	1564	1668	264158	231504	183986	126188	130444	131978	147118	142792	138694	7536	6866	5336	4446	5670	3274	2514	2776	2506	4736	3590	4714	4466	3090	3818	5080	4876	4282	0
1895	298.25034	12.84	297.243	4696	4812	4346	4398	0	4342	4060	4552	0	3196	4312	3756	0	3346	3620	5002	5828	5598	13222	12896	13222	10870	12198	12006	11890	0	12890	3694	2964	2650	2804	0	2326	2308	2436	2378	10770	11506	10460	11372	12130	11942	14414	13198	15732	6530
1896	270.21889	12.85	269.212	10632	10938	10060	15116	13124	16620	13320	13952	12642	4496	4320	5352	3356	3592	3518	4408	4918	5734	75352	74658	74004	55048	55926	61056	58552	59498	61274	4010	3822	3436	4012	3648	3690	4064	4560	4112	20294	20454	19814	18792	19220	18336	25156	26514	25646	2334
1897	186.08700	12.86	185.08	528	260	406	426	296	312	326	328	448	402	430	564	0	538	450	454	458	648	0	0	1346	2912	4042	4376	0	0	380	316	242	0	0	0	232	0	262	138	268	0	0	334	424	410	296	308	490	0
1898	310.21443	12.87	309.207	0	1588	0	1664	1916	2008	0	1830	1994	0	0	1766	4634	3362	3730	4342	4790	4556	2580	2536	2642	1744	2406	2682	2536	2208	3168	2452	1976	2222	1828	2152	2290	1996	2216	2212	16472	17442	16252	17170	16436	14966	20082	21146	21962	1340
1899	296.23469	12.9	295.227	1970	4626	1770	3354	6088	5260	3284	4620	4710	1878	2584	2218	2598	4240	4570	3004	2570	3198	6026	6224	4690	5044	5456	5708	5618	6334	5630	2808	2368	1974	4426	3558	4786	3790	3994	3916	0	0	0	0	10262	10080	0	0	0	2294
1900	312.22811	12.87	311.221	0	0	0	0	0	0	0	0	0	0	0	0	0	0	0	0	0	0	10886	10914	9336	0	0	0	0	8956	8980	0	2122	0	0	0	0	0	0	0	0	0	0	0	0	0	4066	0	4442	0
1901	104.00888	12.87	103.002	574	302	802	0	0	0	0	0	0	680	580	560	504	432	722	636	782	898	822	704	526	298	362	514	358	638	542	674	754	588	710	694	782	766	0	776	446	456	486	0	242	318	0	652	402	0
1902	628.48748	12.88	627.48	0	0	0	0	0	242	0	0	0	0	0	0	0	0	0	0	0	0	64136	51396	39298	22962	22676	24494	28008	27048	25840	0	0	0	0	0	0	0	0	0	0	0	0	0	0	0	0	0	0	0
1903	130.02458	12.89	129.017	10280	9550	8528	10184	9884	9256	7060	8388	7158	5348	4562	3926	3442	3180	3440	4116	4272	3086	1640	1234	0	0	1230	1068	0	0	0	422	0	0	946	0	0	654	518	586	0	664	404	526	412	464	536	626	522	266
1904	131.94922	12.89	130.942	8938	8750	7110	7328	6086	6584	5936	4970	5556	8142	8662	8482	8308	8108	8300	9866	10318	10816	11340	0	10142	6462	9446	10170	0	0	10378	20016	18012	16286	16580	14692	13640	13904	13658	0	9370	10152	9364	10850	9346	9592	9762	9264	9008	5748
1905	174.01466	12.9	173.007	14982	12200	11050	12058	12164	10352	10952	11002	9342	5700	5576	5492	3666	4116	4370	4606	3742	2986	1848	0	1224	0	920	0	0	0	0	340	634	1096	0	550	458	328	470	0	476	400	308	326	592	294	316	0	244	0
1906	112.01413	12.91	111.007	12098	8582	7464	7608	6524	5498	4684	3894	4268	5198	5746	5904	3766	3844	3694	3530	3134	2896	2314	3278	0	0	0	0	0	0	0	528	620	886	590	0	736	946	0	590	1014	970	1002	1028	1132	0	1010	1054	1076	196
1907	288.22958	12.92	287.222	13498	11122	12138	18364	18206	19430	15982	14636	15780	2436	1780	0	0	0	1294	0	1590	1894	85138	0	0	59076	0	0	0	0	0	19616	19974	23738	20274	21130	23186	17900	20182	19790	3218	3386	2850	3080	0	2526	0	0	2732	0
1908	482.26449	12.97	481.257	0	0	0	0	0	0	0	0	1056	0	0	0	0	0	0	0	0	0	0	0	782	0	1974	1704	1984	3512	0	0	0	0	0	0	0	0	0	0	0	33690	18076	6970	5710	4618	4264	3538	4168	1068
1909	135.89983	12.93	134.893	42406	46710	45806	0	46798	47256	0	0	0	57248	54982	55338	51042	50698	52286	56974	0	0	0	15174	15234	16778	15572	7742	11828	11134	9922	2772	4460	5924	3080	8912	5836	0	4314	0	49368	45666	47118	42122	45904	42462	0	32136	0	0
1910	210.09087	12.93	209.084	612	744	692	498	1348	1778	2126	2916	3014	3498	4370	4406	0	1088	0	0	0	944	0	0	1172	0	1518	1674	0	2198	2382	572	498	576	634	612	902	0	0	824	0	1406	0	0	0	0	0	19470	0	4542
1911	101.93868	12.93	100.931	0	0	0	17256	16494	14652	0	0	13470	23228	22108	23772	23096	22008	22484	0	23206	22356	18324	20288	0	0	0	0	0	0	0	0	0	0	22296	21904	21680	0	20692	19278	23784	25486	25280	23622	24804	25942	24808	22382	22314	10074
1912	206.06019	12.95	205.053	0	0	0	510	0	1576	1714	1352	1218	1448	1890	450	296	420	0	276	0	0	0	0	0	0	0	0	0	0	0	0	0	312	910	0	1096	276	0	0	224	350	446	322	252	364	382	0	0	0
1913	258.21869	12.93	257.211	1960	1926	1944	2196	1822	2100	2302	1748	2184	1210	996	1128	970	1032	1062	1946	2162	1838	11634	14158	11836	7992	6210	6760	10086	7576	9290	1308	1356	1456	2086	2038	2126	1882	2154	1902	1624	2182	1736	1816	1762	1650	2314	2442	1990	2110
1914	212.03405	12.93	211.027	634	1110	1026	1662	2046	2512	1936	1832	1936	3364	3320	1912	0	0	726	0	1124	0	0	554	444	274	200	172	0	254	350	520	628	0	536	0	0	458	550	0	708	0	1182	1012	1252	1266	0	1500	0	168
1915	286.21390	12.93	285.207	4936	4172	4818	5660	7010	1686	6742	6110	5728	1378	0	0	1342	1254	1060	1554	1594	1718	14292	12188	10368	5314	0	7588	7754	7820	8476	2648	2532	2124	2714	2350	2426	1968	1870	1984	38120	39348	39994	44760	41314	38916	44692	42542	43948	0
1916	254.22382	12.94	253.217	22028	18250	18666	17196	20998	19380	15084	13650	15008	38048	36904	33624	20706	17088	20858	20258	25290	24060	24588	25820	25668	22052	24570	24492	30862	30306	30838	8234	7000	6082	6338	7648	6174	6382	6216	7360	52482	45276	47068	53642	54414	48322	61414	53130	53840	14692
1917	260.12572	12.94	259.118	390	640	558	342	398	692	242	612	500	404	0	0	0	0	0	0	1510	1670	0	994	524	304	0	306	0	278	218	0	3536	3578	8130	4354	4538	5706	5752	5696	7148	9852	13680	13254	13792	13866	19034	19298	21876	2638
1918	46.00474	12.95	44.9975	0	3586	3770	0	0	2670	0	2588	2318	4462	4716	0	3900	3408	3720	4096	4908	5142	4252	4916	4756	4612	4588	5074	4594	5428	5304	5886	7260	4550	6220	5152	4390	4218	4686	4920	6216	5930	6418	5022	5470	4894	5826	6412	7002	11092
1919	244.20322	12.96	243.196	1952	1602	1330	0	0	0	0	1530	0	0	1020	0	0	0	0	0	0	0	0	2076	0	1588	0	0	1428	0	0	852	0	0	0	0	0	0	0	0	0	0	0	0	0	0	1490	0	0	2208
1920	192.02578	12.95	191.018	54564	40448	33736	23870	15954	12202	9634	8328	8226	18206	20774	20460	12640	13550	14190	11848	9564	9180	8840	8584	7908	6016	5664	4242	2890	2998	2410	0	0	754	0	0	904	0	0	0	1676	1348	1274	0	1136	1088	1110	666	0	116
1921	111.98103	12.95	110.974	1240	1078	0	0	992	1068	800	978	0	1066	1240	1126	1020	1056	1008	990	1214	0	4216	8012	22610	23828	25972	25472	22520	18450	18364	1292	0	1040	704	0	0	0	1278	0	1342	1434	1440	1426	1814	1684	1528	1322	1548	350
1922	247.99705	13	246.99	0	4596	5696	5398	6134	5376	5386	5562	5652	2790	2572	3082	2932	3204	3012	2560	2782	2778	0	0	0	0	0	0	0	0	98662	9212	7884	8538	8128	0	9856	8574	8648	0	2744	2090	2062	2070	2130	2090	1936	1718	1802	994
1923	220.05157	12.96	219.044	32260	34196	34898	36666	40952	41632	39320	37260	38206	27506	26386	26080	26620	26158	27696	29830	23468	20594	448	0	0	0	0	0	0	0	0	31598	0	37132	0	0	0	0	43416	0	2814	2106	2102	1146	1092	1486	1844	1402	1496	196
1924	218.05432	12.97	217.047	93410	102076	104460	113322	116906	111506	105090	108134	109354	81158	77940	76008	72570	75022	77832	86166	0	0	0	0	0	0	0	0	0	0	0	92386	100000	0	0	0	0	0	122666	0	6956	5596	4462	3330	3306	3724	3714	3686	3646	436
1925	238.01039	12.97	237.003	1260	4392	13178	9428	11834	10836	9880	7782	8180	8034	10398	14292	10602	9884	10182	12188	12360	12144	3980	4066	3580	2788	3242	2364	2076	2280	2182	1530	2676	3510	2640	3456	3338	4504	4908	5340	2530	7598	8242	11040	13882	14294	17450	20236	20492	952
1926	380.01981	12.97	379.013	328	276	0	0	0	0	0	0	0	0	0	0	500	0	1032	3602	3344	7256	37100	36548	3230	2000	0	0	1238	0	0	0	298	0	604	0	538	0	0	246	0	518	0	0	0	0	0	0	1060	0
1927	314.28139	12.97	313.274	0	0	0	0	0	0	0	0	0	0	0	846	0	0	0	1110	0	0	0	0	0	0	0	0	0	0	0	0	0	0	0	0	0	0	0	0	0	0	0	0	0	0	0	0	0	4728
1928	217.98687	12.98	216.98	0	0	0	0	0	0	0	0	0	21932	19388	16722	12156	12582	11552	0	12920	12084	24930	40118	126536	170726	0	205280	243048	248162	256246	0	0	0	0	0	0	0	0	0	9860	8444	9188	8348	8120	7876	7540	7720	7456	2218
1929	156.00747	12.98	155	5404	4816	4718	3940	3052	3224	2712	3282	2732	2928	2584	2380	2196	2380	1986	1926	2280	1728	8826	11242	14376	16426	18764	17470	18062	21932	20828	7304	6390	5982	5330	4036	3512	2814	2200	2422	1898	1800	1516	1334	1494	1904	1288	0	1270	296
1930	232.00313	12.99	230.996	6338	7448	7710	8344	9338	8630	0	0	9458	5874	9632	7366	10156	9086	0	0	0	0	5972	4874	8514	9916	9886	11436	10908	11280	11452	4650	4362	4424	5310	5228	5168	5754	5052	5764	2594	2690	3092	2370	2210	2508	1786	1998	2158	1190
1931	328.23933	13.01	327.232	0	0	0	0	0	0	0	0	0	112042	108430	111986	30282	29198	31194	22262	25820	25720	0	0	0	0	0	0	0	0	0	0	0	0	0	0	0	0	0	0	0	0	0	0	0	0	0	0	0	0
1932	272.23497	13.01	253.217	0	2940	2884	0	0	0	0	2676	0	0	0	0	0	0	0	0	0	0	0	0	0	0	0	0	0	0	0	4624	3732	3554	4820	3632	1612	2820	2604	2274	0	0	0	0	0	0	0	0	0	0
1933	470.32289	13.03	469.316	0	0	0	0	0	0	0	0	0	1114	0	0	0	0	678	902	0	0	0	0	642	0	0	0	0	0	0	0	0	0	0	0	0	0	0	0	0	0	0	0	0	0	0	0	0	330
1934	304.23959	13.03	303.232	26230	20576	21054	24894	25202	25976	21274	20892	20536	160848	160376	152994	119452	116034	125776	226784	237002	231848	2428	2960	2214	1780	1774	1886	2092	0	2082	39062	38466	31394	40576	35778	34488	27922	28018	27510	16354	16748	15848	19986	20874	19736	23994	23370	24080	3920
1935	402.29778	13.01	401.291	264	0	460	246	0	264	0	0	0	708	0	0	262	524	0	0	0	0	0	0	0	0	194	0	0	0	0	630	330	540	540	0	156	498	0	282	0	0	0	512	0	0	426	0	572	1248
1936	280.23977	13.08	279.232	11212	9786	9088	9228	9290	10118	10010	8410	9420	25472	27230	25682	24414	27002	24620	29534	32494	34044	16534	14690	15388	12658	12720	14508	14032	14538	16702	22604	20388	20312	22124	19110	20684	16870	14292	14750	20168	19256	18866	23902	23090	21948	26128	29364	26634	21760
1937	284.23450	13.03	283.227	1374	1296	1538	2114	2014	2118	2106	2182	2288	0	0	0	0	0	0	0	0	0	17758	20774	17626	11840	12922	11746	13576	14244	14698	964	854	1186	1470	1282	1356	1052	1342	1594	2266	1766	1944	2342	2634	2176	2516	2144	2770	354
1938	340.21164	13.05	339.204	0	0	0	0	0	0	0	0	11018	35656	36464	43916	41488	41038	37396	44938	44716	42606	0	0	0	0	0	0	0	0	0	0	0	0	0	5732	0	0	6796	5812	0	0	0	0	0	0	0	0	0	0
1939	205.98700	13.07	204.98	606	0	0	434	0	426	254	0	410	414	538	0	0	330	372	472	320	282	132	246	0	0	228	144	0	0	294	0	204	272	266	0	174	0	0	0	238	0	194	204	162	98	186	0	0	0
1940	296.23477	13.07	295.228	4114	0	4306	5254	0	0	5060	0	0	2846	0	2698	4514	0	2100	5962	7128	6996	0	5984	5452	5152	3536	5340	4252	5482	4370	3538	2804	2978	0	0	1436	0	0	0	11612	11584	11678	11624	0	0	16416	16204	16838	2132
1941	186.08757	13.08	185.08	0	532	540	0	0	0	216	0	0	0	248	0	0	0	388	0	0	0	0	0	0	2864	0	4350	0	0	0	338	0	0	0	0	0	264	0	0	0	300	0	0	246	0	266	0	0	0
1942	260.19847	13.08	259.191	4524	0	0	0	0	0	0	0	0	0	458	0	0	334	0	0	0	0	1810	1980	1654	0	0	1504	1300	0	0	948	2498	776	0	0	858	0	0	0	0	1124	0	0	0	3904	3214	2696	4248	238
1943	182.07705	13.09	181.07	54200	49246	0	0	0	40964	0	0	0	0	0	0	0	0	0	0	0	0	1064	0	0	924	810	724	624	0	860	0	0	0	0	0	0	0	0	0	3388	2540	2426	1960	1854	1814	2324	0	2262	1028
1944	183.05527	13.1	182.048	0	0	0	0	0	0	0	0	0	5098	5000	4918	10998	10838	0	9072	4760	3326	176	274	0	0	0	0	0	192	0	0	0	0	0	0	0	0	0	0	522	372	396	384	302	234	368	372	670	0
1945	312.22864	13.09	311.221	0	0	0	0	0	0	0	0	0	0	0	0	0	0	0	0	0	0	0	0	0	0	0	0	0	0	0	0	0	2392	3132	3662	3848	0	2844	0	22988	26526	24400	30834	31620	30442	38928	33622	37048	1004
1946	400.25071	13.11	399.243	0	0	0	0	0	0	558	0	0	0	0	0	0	0	0	0	0	586	0	0	0	0	0	0	0	0	0	0	456	0	0	0	756	0	0	0	820	1040	0	0	0	0	0	584	1102	11126
1947	288.22953	13.11	287.222	0	0	0	1702	0	2642	0	2274	0	0	0	0	0	0	0	0	0	1554	0	0	0	0	0	0	0	0	0	4110	0	0	2822	0	0	3656	2668	2882	2242	0	0	0	0	0	0	0	0	0
1948	135.89948	13.11	134.892	0	0	0	0	0	0	0	0	0	0	0	0	0	0	0	0	0	0	0	0	0	0	0	13008	0	0	0	0	7824	0	0	0	0	0	0	0	0	0	0	0	0	0	0	0	0	0
1949	260.12648	13.12	259.119	600	506	0	0	416	550	0	0	0	0	0	0	1586	0	0	0	1290	1922	926	0	0	204	0	430	358	224	0	14128	9576	6424	9250	7768	6926	9286	7480	8486	7346	7604	0	0	0	0	0	0	2444	2118
1950	328.29718	13.14	327.29	0	0	404	2534	0	0	0	0	0	4738	0	0	0	0	0	934	0	0	0	0	0	0	0	0	0	0	0	0	0	0	0	0	0	0	0	0	0	0	0	0	0	0	0	714	0	7872
1951	268.24091	13.17	267.234	1728	1662	1474	1722	1408	1540	1300	1088	1202	1822	2424	1742	930	0	1320	1866	1330	1544	8346	8592	7984	6386	6252	6052	6406	7894	9742	1272	794	564	914	0	736	684	864	754	2752	1962	1838	2242	2538	2682	3066	2704	2806	1714
1952	330.25568	13.14	329.248	0	0	0	0	536	0	0	0	0	6052	6312	7188	2122	2740	3146	1630	2052	2082	0	0	0	0	0	0	0	0	0	0	0	0	0	0	0	2542	2096	0	0	0	0	0	0	0	0	0	0	0
1953	314.24531	13.16	313.238	1576	3060	0	0	0	1640	0	0	0	0	950	1424	0	0	1218	0	0	0	0	0	0	0	0	0	0	0	0	0	4002	6714	5370	2954	3016	2342	5412	3042	2874	4466	0	3446	3152	3698	0	3624	0	0
1954	366.23519	13.18	365.228	0	0	0	0	0	0	0	0	0	2700	3208	2508	0	0	0	0	0	0	0	0	0	0	0	0	0	1430	0	0	0	0	0	0	0	0	0	0	0	0	0	0	0	0	0	0	0	0
1955	254.22372	13.19	253.216	0	1514	0	2268	2026	0	1666	0	1150	2834	3120	3398	2366	3250	0	2386	2466	2882	18372	18338	15722	11842	13804	12644	15700	14950	18394	0	782	0	1272	0	3502	0	0	0	7872	9426	8072	7998	9732	8966	9564	9404	10410	4956
1956	298.25046	13.17	297.243	2634	2158	0	2272	4196	0	2182	0	5190	2446	2284	0	3446	1692	1966	2320	0	0	0	0	0	0	0	0	0	0	0	3024	2314	1850	2108	0	1850	1584	0	1634	0	0	0	5110	0	0	0	0	0	5408
1957	272.23423	13.19	271.227	0	9728	9568	9004	9936	8088	0	9872	0	2940	3210	2710	2324	2290	2782	0	10402	9354	69728	81938	78182	44556	33150	37124	52626	44754	41404	15026	16948	15366	22926	21988	21188	19446	20058	20154	11998	11276	10454	8852	8704	7964	12918	12104	13714	4530
1958	131.94903	13.18	130.942	7156	7924	6410	6478	6308	5618	5498	5434	5714	7270	7344	7644	6672	7952	7532	8686	0	8454	8902	8656	7722	6570	0	7808	8472	0	9410	21146	0	16684	0	0	11522	0	0	0	8130	0	7912	8976	9522	8220	9772	8734	8560	5876
1959	557.29197	13.22	556.285	0	0	0	764	2820	3542	4468	0	0	0	8620	0	0	9982	0	0	0	5014	0	0	0	0	0	0	0	0	0	0	0	0	8258	0	7514	0	7192	0	0	13608	0	15910	0	0	20032	0	0	3496
1960	556.29017	13.25	555.283	0	0	0	3556	7420	12718	18230	22948	25180	0	0	0	35622	37564	36228	22160	19082	0	0	0	0	0	0	0	0	0	0	40094	33446	34996	26262	25824	24310	21482	22204	24874	41544	45784	0	0	51622	0	0	65960	0	10748
1961	210.09007	13.2	209.083	1102	0	0	0	1604	0	0	3232	3096	4252	4930	4606	0	0	0	0	0	0	0	0	0	0	0	2310	0	3882	3338	734	0	648	698	744	0	930	808	934	0	1656	0	0	0	0	0	0	0	3636
1962	408.25421	13.23	443.224	2456	2670	2696	1938	2210	2070	0	0	0	7280	6962	5910	6684	6052	5438	7870	8182	7532	4776	4888	4514	5294	5266	4798	3920	0	4158	15330	18492	17338	20584	19162	21084	15720	15254	16700	5462	4116	4322	0	640	956	3992	4090	3978	10590
1963	62.99382	13.25	61.9866	0	0	0	0	510	0	0	0	620	986	0	0	1256	1590	1348	1320	1352	1212	6300	7106	8732	6466	7800	8430	10306	11598	12670	3268	2414	1856	1670	1582	1796	1158	1210	1102	0	0	0	0	0	0	1028	0	0	2202
1964	306.25479	13.26	305.248	3188	2654	2442	3008	2850	3008	2912	1974	2508	13306	14838	14278	12794	13524	12608	18046	19606	19306	0	0	0	0	0	0	0	0	0	5414	4476	3796	4406	4272	3740	4102	3666	4346	0	1410	1548	1872	1924	2010	2156	2022	1782	644
1965	334.22685	13.26	333.22	0	4044	3394	4620	5066	5204	5020	5092	4760	1690	0	0	0	0	0	1744	2262	1918	33810	26116	17446	13286	13814	12310	14702	12118	14202	1676	1830	2240	2942	2172	3010	3106	2464	2354	6416	6908	6410	5912	6304	5332	6584	7968	6862	0
1966	582.30425	13.28	581.297	0	0	0	0	828	0	3180	7208	16272	0	0	0	27872	28652	0	0	0	0	0	14270	0	0	0	0	0	0	0	17168	11418	9176	6256	6170	6846	5924	6256	7322	10096	11596	13468	0	14702	14232	0	17386	0	3746
1967	482.26445	13.3	481.257	938	824	0	0	0	972	1450	0	1298	0	1212	1112	1120	1202	0	0	1424	1516	1606	0	1434	1200	1800	1960	1978	3816	0	63282	48880	41628	27820	24262	26982	28898	32306	38886	45478	0	0	6922	5550	5350	4266	4610	4252	0
1968	344.13170	13.31	343.124	294	0	0	0	0	0	0	0	0	0	0	0	0	0	0	0	0	0	0	0	0	0	0	0	0	0	0	0	0	0	0	0	0	0	0	0	0	0	0	0	0	0	0	0	0	0
1969	394.28427	13.32	393.277	2232	0	0	3598	3012	0	2078	0	2218	3638	5582	0	0	0	0	0	5140	0	1034	0	0	2566	2234	0	0	0	0	3724	0	0	0	0	0	0	1768	2006	0	0	0	0	0	0	0	3042	3070	10094
1970	205.98740	13.32	204.98	312	408	0	0	0	206	112	0	0	0	0	428	394	314	432	0	228	0	0	0	0	0	0	0	0	258	444	322	148	244	72	0	206	228	192	172	142	0	146	234	198	182	294	0	230	0
1971	364.27495	13.34	363.268	1224	1086	1230	1350	1230	1594	1450	1196	1322	2890	2484	2192	2166	2558	2384	2218	2454	3084	3198	2580	2268	1630	1440	1610	0	1824	1434	404	562	346	394	740	0	522	486	0	1416	1250	1724	1374	1248	1388	1456	1930	1736	1010
1972	186.08786	13.35	185.081	328	338	556	434	492	430	162	382	498	388	258	498	0	462	414	418	240	0	0	0	0	4350	4938	4522	0	0	0	0	336	428	196	156	242	158	206	242	290	222	0	336	452	338	586	488	522	0
1973	232.00332	13.35	230.996	7262	0	8432	8488	0	8646	8916	0	0	6290	10016	9736	13066	0	0	0	0	0	7492	6382	9552	12140	11992	11290	12142	13086	13484	5228	4890	4376	5670	5820	6576	5896	6256	5784	2808	2732	2578	2866	2692	2678	2546	2328	2214	942
1974	206.05962	13.35	205.052	0	0	0	538	1312	1414	1350	1380	1120	1578	2102	870	518	320	304	0	194	0	0	0	308	296	0	0	318	0	0	0	0	344	1226	1424	1092	164	0	266	486	408	366	0	310	238	342	236	0	0
1975	328.29758	13.37	327.29	1854	2444	1890	1894	2690	2708	2352	2254	2134	5448	4352	4334	3882	3516	4026	4370	0	4368	6544	6832	5884	3628	4510	4242	3934	5198	5068	1158	878	0	0	1192	1168	1116	0	1072	2896	2844	2490	2456	2636	0	2942	3120	3370	20876
1976	288.22944	13.36	287.222	1724	2550	1738	2542	3724	3172	3302	3390	3546	1308	0	984	1378	1350	1196	3348	3360	3576	29212	28000	20304	0	7526	0	8646	11600	12338	10476	11230	10490	16108	16634	14526	14740	13890	13448	54520	46360	43014	39484	39384	37570	46394	49178	49036	878
1977	298.24998	13.38	297.243	18732	17206	17670	24006	26062	24972	24350	24068	24770	2214	4506	4840	5282	5130	5800	9142	8702	10674	307456	241936	186808	131036	127434	125168	167286	165678	161166	12224	10848	9578	15280	15190	14870	16936	13262	13518	31536	33874	30310	30476	30962	29642	38732	39690	39936	5314
1978	111.98063	13.39	110.973	1516	1072	0	0	962	0	0	1006	940	0	0	0	1200	1004	902	1194	1168	0	5760	12394	31746	28318	27890	28742	23556	21546	18596	1396	1700	1180	1288	0	0	1130	0	1346	1296	1726	1352	1530	1512	1874	1756	1480	1602	0
1979	183.05533	13.4	182.048	0	0	0	0	0	0	0	0	0	5592	5540	5864	0	0	11664	10536	6292	6278	0	0	0	150	0	0	0	0	188	0	0	0	0	0	0	0	0	0	0	734	610	294	426	608	522	552	626	0
1980	130.02448	13.38	129.017	7566	6798	6650	7542	6924	7300	6430	6848	5670	2786	3288	3508	2734	2472	2082	4024	3394	2230	1612	1564	1206	1202	0	0	832	1076	820	708	988	1056	0	922	878	668	662	770	452	0	418	386	420	330	236	208	484	0
1981	174.01495	13.37	173.008	10970	8810	8554	8582	9078	8470	7552	7926	7934	4056	3748	3796	3092	3078	2876	4298	3282	2260	2006	2122	1672	0	0	0	0	0	0	768	962	0	976	640	710	516	466	0	332	540	282	330	272	370	200	322	0	0
1982	182.07748	13.37	181.07	0	0	44588	44910	42954	0	37798	0	38066	28342	28066	0	27410	27672	28258	0	0	0	1056	1232	916	0	750	632	0	0	0	0	0	0	0	0	0	0	0	0	3394	3284	2622	2272	1942	2388	2308	2458	2306	0
1983	247.99726	13.37	246.99	5216	5574	6268	5764	6324	5298	0	5864	5996	2924	2546	2644	2958	2860	3176	2680	3014	3130	0	0	0	0	0	0	0	0	0	9384	8158	7778	10142	0	10426	0	9020	9794	2866	2620	2448	2526	2090	2450	2064	2056	1886	924
1984	270.13720	13.4	269.131	12990	10754	10952	11922	11316	8062	5400	1778	1848	1956	1858	2060	0	1096	1140	1918	4220	4368	3652	4110	8148	3916	3414	3612	4700	5598	6038	4994	1758	4732	2314	4516	1630	4760	5500	4812	4336	4978	6832	5430	2590	3572	3338	3308	2182	418
1985	135.89976	13.42	134.892	41816	48754	51088	51476	53592	53700	56928	56714	0	51504	49062	51114	48102	47960	49138	60848	58652	56486	36706	30408	28564	25622	23248	21132	21184	18428	17780	3538	18690	28854	0	0	0	0	0	0	59668	53948	51478	54420	50848	48238	47350	42458	42180	0
1986	222.09161	13.43	221.084	0	0	0	0	0	0	0	662	0	346	0	0	0	0	0	0	306	0	446	0	0	700	0	498	378	262	332	0	0	0	0	0	0	0	0	0	0	0	252	676	0	610	832	644	792	0
1987	380.01945	13.41	379.012	406	0	0	0	0	0	0	0	0	0	0	0	0	0	1256	3718	4008	8600	68992	49492	4774	1860	1582	1158	1310	1300	1246	0	522	568	0	962	538	0	0	528	320	0	550	0	0	0	0	0	0	264
1988	156.00718	13.41	155	4450	4484	4150	3304	3818	3066	2924	2544	2946	2370	2146	2262	2214	1864	1744	2018	1558	0	8828	11050	12584	14122	14606	16314	17696	19296	20926	8210	7378	0	0	4592	3542	2830	2344	2634	1684	1746	1374	1380	1490	1448	1282	1228	1136	136
1989	238.01072	13.42	237.003	0	4424	7906	6988	8290	7684	7760	6350	5910	5216	7944	9870	7816	7838	7900	11862	11562	13584	7920	7984	6006	3970	3420	2980	3014	2790	2924	1640	3300	2820	3240	4186	4470	4598	5882	6596	2852	8752	9084	13062	15478	14856	15438	17356	17762	0
1990	266.15474	13.42	265.147	0	12802	0	12606	0	0	0	11712	10130	12740	10502	12254	13364	15354	16234	17088	20306	19336	0	0	0	0	19620	0	0	0	0	7624	4666	6284	3958	4946	6086	5384	5412	5078	11414	12024	0	0	11784	13884	0	9462	13410	1370
1991	217.98686	13.41	216.98	0	0	0	0	0	0	0	0	0	19776	0	15034	0	13134	10882	15170	14396	14002	42424	67770	229772	289382	293574	316730	379872	362476	367414	0	0	0	0	0	0	0	0	0	11792	10682	9090	8934	9220	9720	8068	8490	8318	1904
1992	201.99219	13.41	200.985	0	330	0	0	0	0	0	416	0	156	508	484	0	534	454	706	0	0	14998	16794	4486	2538	2236	2228	2370	1934	1738	0	0	476	514	0	0	516	0	406	374	372	396	336	544	372	360	544	336	258
1993	210.09126	13.39	209.084	0	714	0	0	1770	2630	2776	2998	4586	4884	5444	4838	1362	1274	1012	1204	1686	1230	1558	1734	2000	3062	2830	3406	4076	4298	4366	1194	0	730	832	1014	1170	768	1170	1016	1506	2000	1214	24180	25744	23350	21138	20216	25528	3890
1994	557.29457	13.42	556.287	0	0	524	0	2316	4340	5832	7032	8194	10192	8782	9642	11442	11204	11734	7090	5278	5252	0	0	0	0	0	0	0	0	0	12320	10254	10818	8356	8358	0	6622	6854	8234	13108	0	16688	0	15210	18872	0	20218	22772	0
1995	298.16005	13.42	297.153	0	0	18058	17238	0	0	0	0	14012	0	0	20996	0	20578	20878	22574	0	20402	0	18978	0	0	0	0	0	0	0	11534	9778	0	4924	6670	7584	8836	9230	10212	19094	19990	23876	25748	0	22400	0	21162	21158	1796
1996	340.20694	13.43	339.2	0	0	0	0	16726	0	11976	0	0	0	0	0	0	0	0	0	39448	0	0	0	0	0	0	0	0	0	0	19454	0	23096	0	12592	0	0	7942	10236	16550	18170	23040	26840	31466	0	0	26730	0	1462
1997	312.17536	13.42	311.168	0	0	0	0	0	0	0	0	0	0	0	0	0	0	0	54042	0	0	0	0	0	0	0	0	0	0	0	0	0	0	0	0	16278	0	0	0	39768	0	48852	54112	59372	58122	44354	0	46142	2880
[truncated: 541 more rows]
[truncated: 62 more columns]
